# Supplementary material for: Temporal Quantitative Proteomics Analysis of Neuroblastoma Cells Treated with Bovine Milk-Derived Extracellular Vesicles Highlights the Anti-Proliferative Properties of Milk-Derived Extracellular Vesicles
Source: MDPI journal article supplement (doi:10.3390/cells10040750), 2021-03-29
Supplement: s1 [file s1]

# Temporal Quantitative Proteomics Analysis of Neuroblastoma Cells Treated with Bovine Milk-Derived Extracellular Vesicles Highlights the Anti-Proliferative Properties of Milk-Derived Extracellular Vesicles

Pamali Fonseka <sup>1,\*</sup> Taeyoung Kang <sup>1</sup>, Sing Chee <sup>1</sup>, Sai V. Chitti <sup>1</sup>, Rahul Sanwani <sup>1</sup>, Ching-Seng Ang <sup>2</sup> and Suresh Mathivanan <sup>1,\*</sup>

Supplementary Figure:

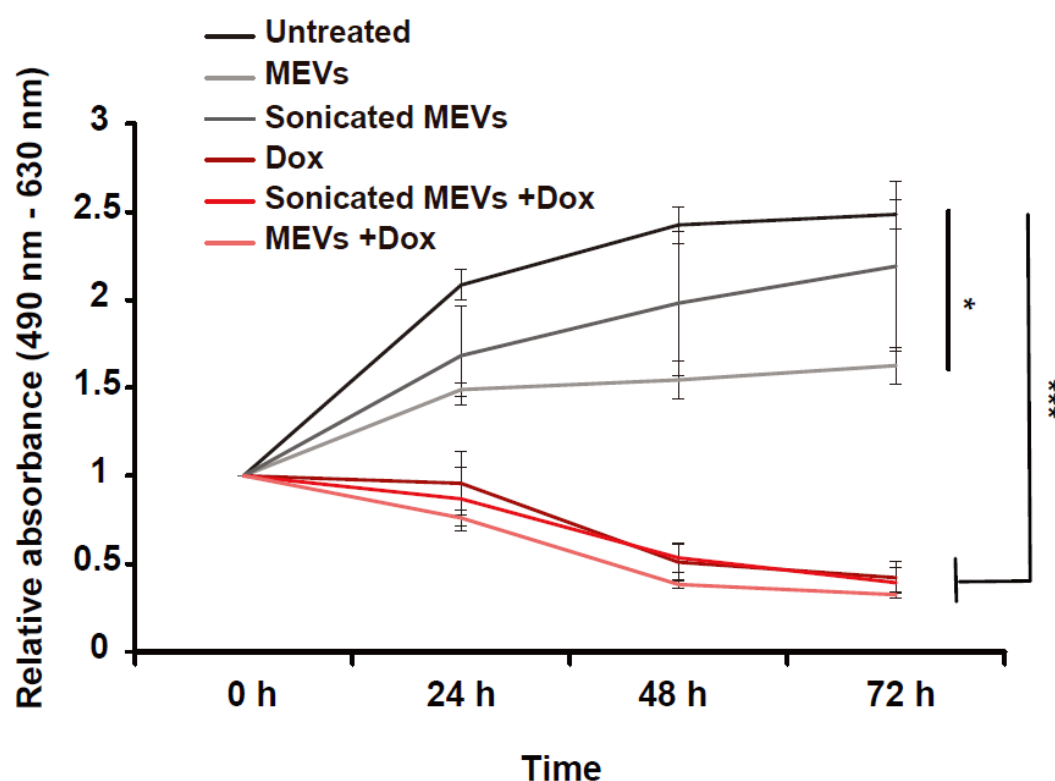

**Figure S1.** Sonicated MEVs did not decrease the proliferation rate of NBL cells. The relative proliferation rate of NBL cells were analyzed in the presence and absence of MEVs (100  $\mu$ g/mL) or sonicated MEVs (100  $\mu$ g/mL) or combinatorial treatment using MTS assay. Doxorubicin and combinatorial treatment of doxorubicin and MEVs or sonicated MEVs decreased proliferation rate of SK-N-BE2 cells significantly. Error bars represent the standard error of mean, n = 3, \* denotes the significance of p < 0.05, \*\* denotes the significance of p < 0.01, \*\*\*\* denotes the significance of p < 0.0001 as determined by t-test and one-way analysis of variance (ANOVA) with Turkey-Kramer multiple comparison post-hoc test using GraphPad Prism 8 software

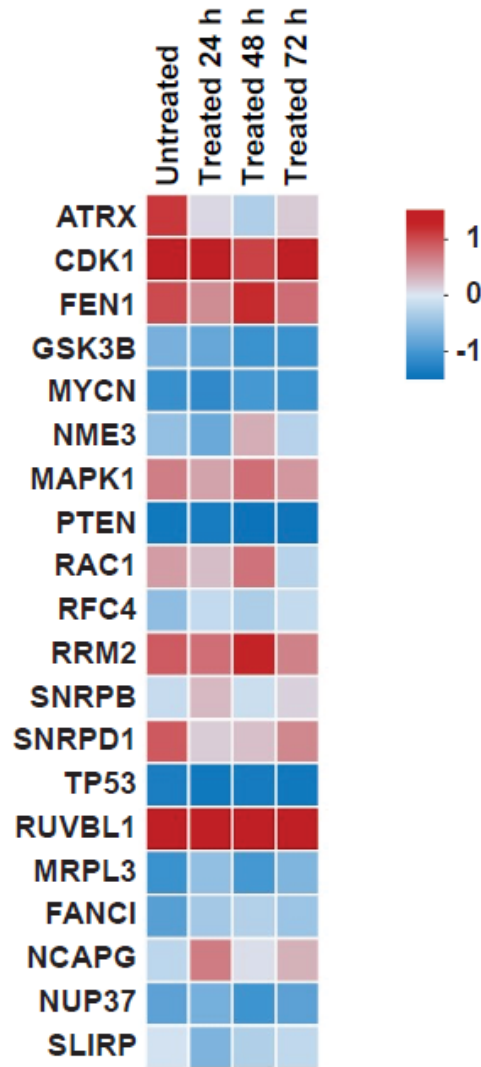

**Figure S2.** Heatmap of proteins that are crucial in NBL aggressiveness. Heatmap was generated using the quantitative abundance of proteins involved in NBL aggressiveness.

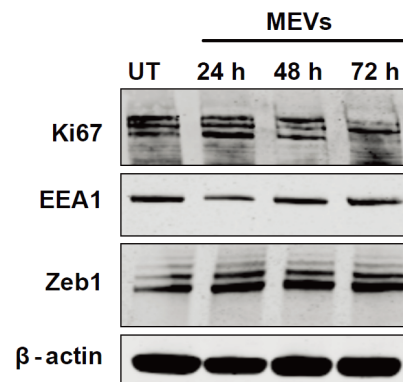

**Figure S3.** Validation of proteomics analysis using Western blotting. Ki67 and EEA1 expression levels were decreased upon treatment of MEVs. Zeb1 protein expression levels were increased upon treatment with MEVs in SK-N-BE2 cells. Here,  $\beta$ -actin was used as the loading control.
