# Supplementary material for: Temporal Quantitative Proteomics Analysis of Neuroblastoma Cells Treated with Bovine Milk-Derived Extracellular Vesicles Highlights the Anti-Proliferative Properties of Milk-Derived Extracellular Vesicles
Source: Cells. 2021 Mar 29;10(4):750. doi: 10.3390/cells10040750 (PMC8065825; doi:10.3390/cells10040750)
Supplement: Supplementary file 1 [file cells-10-00750-s001.zip › cells-1140147-supplementary/FONSEKA_MEV NBL_Supp Table_1.xlsx]

## Sheet: Untreated vs MEV treated 24 h
					Untreated Rep 1			Untreated Rep 2			Untreated Rep 3			Untreated	Untreated	Treated - 24 h Rep 1			Treated - 24 h Rep 2			Treated - 24 h Rep 3			Treated - 24 h	Treated - 24 h	24 h/UT
Entrez ID	Gene Symbol	Gene Desc	Alternate names	Refseq	No. of peptides	No. of spectra	NSpC	No. of peptides	No. of spectra	NSpC	No. of peptides	No. of spectra	NSpC	Average NspC	SD	No. of peptides	No. of spectra	NSpC	No. of peptides	No. of spectra	NSpC	No. of peptides	No. of spectra	NSpC	Average NspC	SD	FOLD
6407	SEMG2	semenogelin II	SGII	NP_002999	0	0	0.2243	0	0	0.2332	0	0	0.2225	0.226667	0.00572917	0	0	0.6891	42	66	12.0592	0	0	0.2279	4.3254	6.70164	19.0826
2059	EPS8	epidermal growth factor receptor pathway substrate 8	DFNB102	NP_004438	0	0	0.2243	0	0	0.2332	0	0	0.2225	0.226667	0.00572917	5	18	10.622	0	0	0.2239	0	0	0.2279	3.69127	6.00219	16.285
6406	SEMG1	semenogelin I	CT103|SEMG|SGI|dJ172H20.2	NP_002998	0	0	0.2243	0	0	0.2332	0	0	0.2225	0.226667	0.00572917	0	0	0.6891	34	54	9.9052	0	0	0.2279	3.6074	5.45893	15.915
1832	DSP	desmoplakin	DCWHKTA|DP	NP_001008844;NP_001305963;NP_004406	0	0	0.2243	1	1	0.4197	8	8	1.6464	0.763467	0.770859	21	25	14.4902	0	0	0.2239	4	4	0.9574	5.22383	8.03329	6.84225
388015	RTL1	retrotransposon-like 1	MART1|Mar1|PEG11	NP_001128360	2	2	0.5833	0	0	0.2332	0	0	0.2225	0.346333	0.205289	9	10	6.2049	0	0	0.2239	0	0	0.2279	2.2189	3.45198	6.40683
54762	GRAMD1C	GRAM domain containing 1C	-	NP_001165576;NP_060047	0	0	0.2243	0	0	0.2332	0	0	0.2225	0.226667	0.00572917	4	4	2.8947	1	1	0.403	1	1	0.4103	1.236	1.43648	5.45294
5289	PIK3C3	phosphatidylinositol 3-kinase catalytic subunit type 3	VPS34|Vps34|hVps34	NP_001294949;NP_002638	0	0	0.2243	0	0	0.2332	0	0	0.2225	0.226667	0.00572917	1	4	2.8947	0	0	0.2239	0	0	0.2279	1.1155	1.54083	4.92132
84936	ZFYVE19	zinc finger, FYVE domain containing 19	ANCHR|MPFYVE	NP_001070736;NP_001245349;NP_001245350;NP_116239	0	0	0.2243	0	0	0.2332	0	0	0.2225	0.226667	0.00572917	3	3	2.3432	2	2	0.5821	1	1	0.4103	1.11187	1.06982	4.90529
1659	DHX8	DEAH-box helicase 8	DDX8|HRH1|PRP22|PRPF22	NP_001289552;NP_001309145;NP_001309146;NP_001309147;NP_001309148;NP_001309149;NP_001309150;NP_004932	1	1	0.4038	0	0	0.2332	2	3	0.7564	0.464467	0.266824	4	6	3.9978	6	8	1.657	1	1	0.4103	2.0217	1.82134	4.35273
27445	PCLO	piccolo presynaptic cytomatrix protein	ACZ|PCH3	NP_055325;NP_149015	0	0	0.2243	0	0	0.2332	0	0	0.2225	0.226667	0.00572917	1	1	1.2404	3	3	0.7612	4	4	0.9574	0.986333	0.240907	4.35147
576	ADGRB2	adhesion G protein-coupled receptor B2	BAI2	NP_001281264;NP_001281265	0	0	0.2243	0	0	0.2332	0	0	0.2225	0.226667	0.00572917	3	3	2.3432	0	0	0.2239	0	0	0.2279	0.931667	1.22243	4.11029
7625	ZNF74	zinc finger protein 74	COS52|ZFP520|ZNF520|hZNF7	NP_001243452;NP_001243453;NP_001243454;NP_003417	1	1	0.4038	0	0	0.2332	1	1	0.4004	0.3458	0.0975293	1	4	2.8947	1	2	0.5821	2	2	0.5926	1.35647	1.33216	3.92269
1861	TOR1A	torsin family 1, member A (torsin A)	DQ2|DYT1	NP_000104	1	1	0.4038	0	0	0.2332	1	1	0.4004	0.3458	0.0975293	0	0	0.6891	6	7	1.4778	9	9	1.8694	1.34543	0.60118	3.89078
10349	ABCA10	ATP binding cassette subfamily A member 10	EST698739	NP_525021	0	0	0.2243	0	0	0.2332	0	0	0.2225	0.226667	0.00572917	1	2	1.7917	0	0	0.2239	2	2	0.5926	0.8694	0.819733	3.83559
221322	TBC1D32	TBC1 domain family member 32	BROMI|C6orf170|C6orf171|bA301B7.2|bA57L9.1|dJ310J6.1	NP_689943	0	0	0.2243	0	0	0.2332	0	0	0.2225	0.226667	0.00572917	1	2	1.7917	1	1	0.403	1	1	0.4103	0.868333	0.799667	3.83088
54443	ANLN	anillin actin binding protein	FSGS8|Scraps|scra	NP_001271230;NP_001271231;NP_061155	0	0	0.2243	1	1	0.4197	0	0	0.2225	0.288833	0.113337	1	1	1.2404	6	6	1.2987	3	3	0.775	1.1047	0.287013	3.8247
63922	CHTF18	chromosome transmission fidelity factor 18	C16orf41|C321D2.2|C321D2.3|C321D2.4|CHL12|Ctf18|RUVBL	NP_071375	0	0	0.2243	0	0	0.2332	0	0	0.2225	0.226667	0.00572917	0	0	0.6891	4	4	0.9404	4	4	0.9574	0.8623	0.150236	3.80426
5294	PIK3CG	phosphatidylinositol-4,5-bisphosphate 3-kinase catalytic subunit gamma	PI3CG|PI3K|PI3Kgamma|PIK3|p110gamma|p120-PI3K	NP_001269355;NP_001269356;NP_002640	1	1	0.4038	0	0	0.2332	1	1	0.4004	0.3458	0.0975293	1	4	2.8947	1	2	0.5821	1	1	0.4103	1.2957	1.38744	3.74696
6558	SLC12A2	solute carrier family 12 (sodium/potassium/chloride transporter), member 2	BSC|BSC2|NKCC1|PPP1R141	NP_001037;NP_001243390	0	0	0.2243	0	0	0.2332	1	1	0.4004	0.285967	0.099202	3	3	2.3432	1	1	0.403	1	1	0.4103	1.05217	1.11807	3.67933
3727	JUND	jun D proto-oncogene	AP-1	NP_001273897;NP_005345	0	0	0.2243	0	0	0.2332	0	0	0.2225	0.226667	0.00572917	2	2	1.7917	0	0	0.2239	1	1	0.4103	0.808633	0.856447	3.5675
6416	MAP2K4	mitogen-activated protein kinase kinase 4	JNKK|JNKK1|MAPKK4|MEK4|MKK4|PRKMK4|SAPKK-1|SAPKK1|SEK1|SERK1|SKK1	NP_001268364;NP_003001	0	0	0.2243	0	0	0.2332	0	0	0.2225	0.226667	0.00572917	2	2	1.7917	0	0	0.2239	1	1	0.4103	0.808633	0.856447	3.5675
23774	BRD1	bromodomain containing 1	BRL|BRPF1|BRPF2	NP_001291737;NP_001291738	0	0	0.2243	0	0	0.2332	0	0	0.2225	0.226667	0.00572917	2	2	1.7917	1	1	0.403	0	0	0.2279	0.807533	0.856798	3.56265
3963	LGALS7	lectin, galactoside-binding, soluble, 7	GAL7|LGALS7A	NP_002298	0	0	0.2243	0	0	0.2332	0	0	0.2225	0.226667	0.00572917	1	2	1.7917	1	1	0.403	0	0	0.2279	0.807533	0.856798	3.56265
653499	LGALS7B	lectin, galactoside-binding, soluble, 7B	GAL7|Gal-7|HKL-14|LGALS7|PI7	NP_001035972	0	0	0.2243	0	0	0.2332	0	0	0.2225	0.226667	0.00572917	1	2	1.7917	1	1	0.403	0	0	0.2279	0.807533	0.856798	3.56265
79677	SMC6	structural maintenance of chromosomes 6	SMC-6|SMC6L1|hSMC6	NP_001135758;NP_078900	2	2	0.5833	0	0	0.2332	0	0	0.2225	0.346333	0.205289	3	3	2.3432	3	3	0.7612	2	2	0.5926	1.23233	0.965725	3.55823
10580	SORBS1	sorbin and SH3 domain containing 1	CAP|FLAF2|R85FL|SH3D5|SH3P12|SORB1	NP_001030126;NP_001030127;NP_001030128;NP_001030129;NP_001277223;NP_001277224;NP_001277225;NP_001277226;NP_001277227;NP_006425;NP_056200;NP_079267	0	0	0.2243	0	0	0.2332	0	0	0.2225	0.226667	0.00572917	1	1	1.2404	2	2	0.5821	1	2	0.5926	0.805033	0.377075	3.55162
9212	AURKB	aurora kinase B	AIK2|AIM-1|AIM1|ARK2|AurB|IPL1|PPP1R48|STK12|STK5|aurkb-sv1|aurkb-sv2	NP_001243763;NP_001271455;NP_001300879;NP_001300880;NP_001300881;NP_001300882;NP_001300883;NP_001300884;NP_004208	0	0	0.2243	0	0	0.2332	0	0	0.2225	0.226667	0.00572917	0	0	0.6891	1	1	0.403	6	6	1.3222	0.804767	0.470389	3.55044
114793	FMNL2	formin like 2	FHOD2	NP_443137	0	0	0.2243	0	0	0.2332	0	0	0.2225	0.226667	0.00572917	1	1	1.2404	3	3	0.7612	1	1	0.4103	0.803967	0.416699	3.54691
5297	PI4KA	phosphatidylinositol 4-kinase, catalytic, alpha	PI4K-ALPHA|PIK4CA|PMGYCHA|pi4K230	NP_477352	0	0	0.2243	0	0	0.2332	0	0	0.2225	0.226667	0.00572917	1	1	1.2404	3	3	0.7612	1	1	0.4103	0.803967	0.416699	3.54691
79971	WLS	wntless Wnt ligand secretion mediator	C1orf139|EVI|GPR177|MRP|mig-14	NP_001002292;NP_001180263;NP_079187	0	0	0.2243	0	0	0.2332	0	0	0.2225	0.226667	0.00572917	1	1	1.2404	3	3	0.7612	1	1	0.4103	0.803967	0.416699	3.54691
3150	HMGN1	high mobility group nucleosome binding domain 1	HMG14	NP_004956	1	1	0.4038	0	0	0.2332	1	1	0.4004	0.3458	0.0975293	2	4	2.8947	1	1	0.403	0	0	0.2279	1.1752	1.4917	3.3985
23380	SRGAP2	SLIT-ROBO Rho GTPase activating protein 2	ARHGAP34|FNBP2|SRGAP2A|SRGAP3	NP_001164108;NP_001287881;NP_056141	1	1	0.4038	1	1	0.4197	0	0	0.2225	0.348667	0.109552	3	4	2.8947	1	1	0.403	0	0	0.2279	1.1752	1.4917	3.37055
84196	USP48	ubiquitin specific peptidase 48	RAP1GA1|USP31	NP_001027902;NP_115612	0	0	0.2243	1	1	0.4197	1	1	0.4004	0.348133	0.107676	2	2	1.7917	5	5	1.1195	2	2	0.5926	1.16793	0.601015	3.35484
54926	UBE2R2	ubiquitin conjugating enzyme E2R 2	CDC34B|E2-CDC34B|UBC3B	NP_060281	1	1	0.4038	0	0	0.2332	2	2	0.5784	0.405133	0.172604	3	3	2.3432	6	7	1.4778	0	0	0.2279	1.34963	1.06346	3.33133
55511	SAGE1	sarcoma antigen 1	CT14|SAGE	NP_061136	2	3	0.7627	0	0	0.2332	1	1	0.4004	0.465433	0.270674	1	5	3.4462	0	0	0.2239	1	4	0.9574	1.5425	1.68895	3.31412
51703	ACSL5	acyl-CoA synthetase long-chain family member 5	ACS2|ACS5|FACL5	NP_057318;NP_976313;NP_976314	0	0	0.2243	0	0	0.2332	0	0	0.2225	0.226667	0.00572917	2	2	1.7917	0	0	0.2239	0	0	0.2279	0.747833	0.904017	3.29926
170689	ADAMTS15	ADAM metallopeptidase with thrombospondin type 1 motif 15	-	NP_620686	0	0	0.2243	0	0	0.2332	0	0	0.2225	0.226667	0.00572917	2	2	1.7917	0	0	0.2239	0	0	0.2279	0.747833	0.904017	3.29926
9912	ARHGAP44	Rho GTPase activating protein 44	NPC-A-10|RICH2	NP_001308093;NP_001308095;NP_001308096;NP_001308097;NP_055674	0	0	0.2243	0	0	0.2332	0	0	0.2225	0.226667	0.00572917	2	2	1.7917	0	0	0.2239	0	0	0.2279	0.747833	0.904017	3.29926
8938	BAIAP3	BAI1-associated protein 3	BAP3	NP_001186025;NP_001186026;NP_001186027;NP_001186028;NP_001273393;NP_003924	0	0	0.2243	0	0	0.2332	0	0	0.2225	0.226667	0.00572917	1	2	1.7917	0	0	0.2239	0	0	0.2279	0.747833	0.904017	3.29926
256076	COL6A5	collagen type VI alpha 5	COL29A1|VWA4	NP_001265227;NP_694996	0	0	0.2243	0	0	0.2332	0	0	0.2225	0.226667	0.00572917	2	2	1.7917	0	0	0.2239	0	0	0.2279	0.747833	0.904017	3.29926
100128553	CTAGE4	CTAGE family member 4	cTAGE-4	NP_940897	0	0	0.2243	0	0	0.2332	0	0	0.2225	0.226667	0.00572917	2	2	1.7917	0	0	0.2239	0	0	0.2279	0.747833	0.904017	3.29926
100142659	CTAGE8	CTAGE family member 8	-	NP_001265436	0	0	0.2243	0	0	0.2332	0	0	0.2225	0.226667	0.00572917	2	2	1.7917	0	0	0.2239	0	0	0.2279	0.747833	0.904017	3.29926
643854	CTAGE9	CTAGE family member 9	-	NP_001139131	0	0	0.2243	0	0	0.2332	0	0	0.2225	0.226667	0.00572917	2	2	1.7917	0	0	0.2239	0	0	0.2279	0.747833	0.904017	3.29926
254228	FAM26E	family with sequence similarity 26 member E	C6orf188|dJ493F7.3	NP_714922	0	0	0.2243	0	0	0.2332	0	0	0.2225	0.226667	0.00572917	2	2	1.7917	0	0	0.2239	0	0	0.2279	0.747833	0.904017	3.29926
80000	GREB1L	growth regulation by estrogen in breast cancer-like	C18orf6|KIAA1772	NP_001136438	0	0	0.2243	0	0	0.2332	0	0	0.2225	0.226667	0.00572917	2	2	1.7917	0	0	0.2239	0	0	0.2279	0.747833	0.904017	3.29926
146850	PIK3R6	phosphoinositide-3-kinase regulatory subunit 6	C17orf38|HsT41028|p84 PIKAP|p87(PIKAP)|p87PIKAP	NP_001010855;NP_001277140	0	0	0.2243	0	0	0.2332	0	0	0.2225	0.226667	0.00572917	1	2	1.7917	0	0	0.2239	0	0	0.2279	0.747833	0.904017	3.29926
89777	SERPINB12	serpin peptidase inhibitor, clade B (ovalbumin), member 12	YUKOPIN	NP_001294857;NP_536722	0	0	0.2243	0	0	0.2332	0	0	0.2225	0.226667	0.00572917	2	2	1.7917	0	0	0.2239	0	0	0.2279	0.747833	0.904017	3.29926
6560	SLC12A4	solute carrier family 12 (potassium/chloride transporter), member 4	KCC1	NP_001139433;NP_001139434;NP_001139435;NP_001139436;NP_005063	0	0	0.2243	0	0	0.2332	0	0	0.2225	0.226667	0.00572917	2	2	1.7917	0	0	0.2239	0	0	0.2279	0.747833	0.904017	3.29926
54434	SSH1	slingshot protein phosphatase 1	SSH1L	NP_001154802;NP_001154803;NP_061857	0	0	0.2243	0	0	0.2332	0	0	0.2225	0.226667	0.00572917	2	2	1.7917	0	0	0.2239	0	0	0.2279	0.747833	0.904017	3.29926
9895	TECPR2	tectonin beta-propeller repeat containing 2	KIAA0329|SPG49	NP_001166102;NP_055659	0	0	0.2243	0	0	0.2332	0	0	0.2225	0.226667	0.00572917	1	2	1.7917	0	0	0.2239	0	0	0.2279	0.747833	0.904017	3.29926
79770	TXNDC15	thioredoxin domain containing 15	C5orf14|UNQ335	NP_078991	0	0	0.2243	0	0	0.2332	0	0	0.2225	0.226667	0.00572917	2	2	1.7917	0	0	0.2239	0	0	0.2279	0.747833	0.904017	3.29926
6304	SATB1	SATB homeobox 1	-	NP_001124482;NP_001182399;NP_001309800;NP_001309801;NP_001309802;NP_001309803;NP_001309804;NP_001309805;NP_002962	0	0	0.2243	0	0	0.2332	0	0	0.2225	0.226667	0.00572917	0	0	0.6891	0	0	0.2239	2	6	1.3222	0.745067	0.551285	3.28706
5092	PCBD1	pterin-4 alpha-carbinolamine dehydratase/dimerization cofactor of hepatocyte nuclear factor 1 alpha	DCOH|PCBD|PCD|PHS	NP_000272;NP_001276726;NP_001309933	2	2	0.5833	1	1	0.4197	1	1	0.4004	0.4678	0.10049	3	4	2.8947	4	4	0.9404	3	3	0.775	1.5367	1.17897	3.28495
55250	ELP2	elongator acetyltransferase complex subunit 2	SHINC-2|STATIP1|StIP	NP_001229804;NP_001229805;NP_001229806;NP_001229807;NP_001229808;NP_001311394;NP_001311395;NP_001311396;NP_001311397;NP_060725	0	0	0.2243	0	0	0.2332	0	0	0.2225	0.226667	0.00572917	1	1	1.2404	2	2	0.5821	1	1	0.4103	0.744267	0.438167	3.28353
93081	TEX30	testis expressed 30	C13orf27	NP_001273704;NP_001273705;NP_620134	0	0	0.2243	0	0	0.2332	0	0	0.2225	0.226667	0.00572917	1	1	1.2404	2	2	0.5821	1	1	0.4103	0.744267	0.438167	3.28353
55170	PRMT6	protein arginine methyltransferase 6	HRMT1L6	NP_060607	0	0	0.2243	0	0	0.2332	1	1	0.4004	0.285967	0.099202	2	3	2.3432	0	0	0.2239	0	0	0.2279	0.931667	1.22243	3.25796
5629	PROX1	prospero homeobox 1	-	NP_001257545;NP_002754	0	0	0.2243	1	1	0.4197	0	0	0.2225	0.288833	0.113337	3	3	2.3432	0	0	0.2239	0	0	0.2279	0.931667	1.22243	3.22562
8861	LDB1	LIM domain binding 1	CLIM2|NLI	NP_001106878;NP_001308541;NP_003884	1	1	0.4038	0	0	0.2332	1	1	0.4004	0.3458	0.0975293	2	2	1.7917	2	3	0.7612	3	3	0.775	1.1093	0.591016	3.20792
55246	CCDC25	coiled-coil domain containing 25	-	NP_001291458;NP_001291459;NP_001291461;NP_060716	3	3	0.7627	1	2	0.6063	2	3	0.7564	0.708467	0.088535	1	6	3.9978	2	5	1.1195	2	8	1.6869	2.26807	1.52462	3.20137
23061	TBC1D9B	TBC1 domain family member 9B	-	NP_055858;NP_942568	0	0	0.2243	1	1	0.4197	1	1	0.4004	0.348133	0.107676	1	1	1.2404	7	7	1.4778	2	2	0.5926	1.1036	0.458182	3.17005
1828	DSG1	desmoglein 1	CDHF4|DG1|DSG|EPKHE|EPKHIA|PPKS1|SPPK1	NP_001933	3	3	0.7627	3	4	0.9795	4	4	0.9344	0.8922	0.114395	11	12	7.3088	2	2	0.5821	1	1	0.4103	2.76707	3.93419	3.1014
1282	COL4A1	collagen type IV alpha 1	BSVD|RATOR	NP_001290039;NP_001836	0	0	0.2243	0	0	0.2332	2	2	0.5784	0.3453	0.20192	3	3	2.3432	0	0	0.2239	2	2	0.5926	1.05323	1.13225	3.0502
23325	KIAA1033	KIAA1033	MRT43|SWIP	NP_001280569;NP_056090	0	0	0.2243	0	0	0.2332	4	4	0.9344	0.463967	0.407432	3	3	2.3432	6	6	1.2987	2	2	0.5926	1.4115	0.880734	3.04224
1475	CSTA	cystatin A	AREI|STF1|STFA	NP_005204	2	2	0.5833	0	0	0.2332	0	0	0.2225	0.346333	0.205289	2	3	2.3432	2	2	0.5821	0	0	0.2279	1.05107	1.13295	3.03484
29763	PACSIN3	protein kinase C and casein kinase substrate in neurons 3	SDPIII	NP_001171903;NP_001171904;NP_057307	0	0	0.2243	1	1	0.4197	1	1	0.4004	0.348133	0.107676	3	3	2.3432	0	0	0.2239	2	2	0.5926	1.05323	1.13225	3.02537
57647	DHX37	DEAH-box helicase 37	DDX37	NP_116045	2	2	0.5833	1	1	0.4197	1	1	0.4004	0.4678	0.10049	4	4	2.8947	4	4	0.9404	1	1	0.4103	1.41513	1.30847	3.02508
55274	PHF10	PHD finger protein 10	BAF45A|XAP135	NP_060758;NP_579866	0	0	0.2243	0	0	0.2332	0	0	0.2225	0.226667	0.00572917	1	1	1.2404	0	0	0.2239	2	2	0.5926	0.685633	0.514596	3.02485
64411	ARAP3	ArfGAP with RhoGAP domain, ankyrin repeat and PH domain 3	CENTD3|DRAG1	NP_071926	1	1	0.4038	0	0	0.2332	0	0	0.2225	0.2865	0.101726	1	1	1.2404	2	2	0.5821	3	3	0.775	0.865833	0.338419	3.02211
8914	TIMELESS	timeless circadian clock	TIM|TIM1|hTIM	NP_003911	0	0	0.2243	0	0	0.2332	0	0	0.2225	0.226667	0.00572917	1	1	1.2404	1	1	0.403	1	1	0.4103	0.684567	0.48138	3.02015
64061	TSPYL2	TSPY-like 2	CDA1|CINAP|CTCL|DENTT|HRIHFB2216|NP79|SE204|TSPX	NP_071400	0	0	0.2243	0	0	0.2332	0	0	0.2225	0.226667	0.00572917	1	1	1.2404	1	1	0.403	1	1	0.4103	0.684567	0.48138	3.02015
55275	VPS53	VPS53 GARP complex subunit	HCCS1|PCH2E|hVps53L|pp13624	NP_001121631;NP_060759	0	0	0.2243	0	0	0.2332	0	0	0.2225	0.226667	0.00572917	1	1	1.2404	1	1	0.403	1	1	0.4103	0.684567	0.48138	3.02015
11128	POLR3A	polymerase (RNA) III (DNA directed) polypeptide A, 155kDa	ADDH|HLD7|RPC1|RPC155|hRPC155	NP_008986	4	4	0.9422	0	0	0.2332	0	0	0.2225	0.465967	0.412465	2	2	1.7917	9	9	1.8361	2	2	0.5926	1.4068	0.705467	3.0191
84167	C19orf44	chromosome 19 open reading frame 44	-	NP_001275763;NP_115583	0	0	0.2243	0	0	0.2332	0	0	0.2225	0.226667	0.00572917	1	1	1.2404	2	2	0.5821	0	0	0.2279	0.683467	0.513805	3.01529
283638	CEP170B	centrosomal protein 170B	CEP170R|FAM68C|KIAA0284	NP_001106197;NP_055820	0	0	0.2243	0	0	0.2332	0	0	0.2225	0.226667	0.00572917	1	1	1.2404	2	2	0.5821	0	0	0.2279	0.683467	0.513805	3.01529
56288	PARD3	par-3 family cell polarity regulator	ASIP|Baz|PAR3|PAR3alpha|PARD-3|PARD3A|PPP1R118|SE2-5L16|SE2-5LT1|SE2-5T2	NP_001171714;NP_001171715;NP_001171716;NP_001171717;NP_001171718;NP_001171719;NP_001171720;NP_001171721;NP_001171722;NP_001171723;NP_062565	0	0	0.2243	0	0	0.2332	0	0	0.2225	0.226667	0.00572917	1	1	1.2404	2	2	0.5821	0	0	0.2279	0.683467	0.513805	3.01529
57572	DOCK6	dedicator of cytokinesis 6	AOS2|ZIR1	NP_065863	1	1	0.4038	1	1	0.4197	0	0	0.2225	0.348667	0.109552	2	2	1.7917	5	5	1.1195	0	0	0.2279	1.04637	0.784461	3.00105
6904	TBCD	tubulin folding cofactor D	SSD-1|tfcD	NP_005984	3	3	0.7627	2	2	0.6063	6	6	1.2904	0.886467	0.358451	4	4	2.8947	14	17	3.2697	7	8	1.6869	2.6171	0.82711	2.95228
196374	KRT78	keratin 78, type II	CK-78|K5B|K78|Kb40	NP_001287743;NP_775487	2	5	1.1217	1	1	0.4197	1	1	0.4004	0.647267	0.410985	6	7	4.5495	1	2	0.5821	1	2	0.5926	1.90807	2.28755	2.94788
54906	FAM208B	family with sequence similarity 208 member B	C10orf18|bA318E3.2	NP_001308712;NP_001308713;NP_001308714;NP_060252	4	4	0.9422	1	1	0.4197	2	2	0.5784	0.646767	0.267875	3	3	2.3432	4	4	0.9404	12	12	2.4166	1.90007	0.831906	2.93779
10644	IGF2BP2	insulin like growth factor 2 mRNA binding protein 2	IMP-2|IMP2|VICKZ2	NP_001007226;NP_001278798;NP_001278801;NP_001278802;NP_001278803;NP_001278804;NP_006539	1	1	0.4038	0	0	0.2332	2	2	0.5784	0.405133	0.172604	3	3	2.3432	2	2	0.5821	2	2	0.5926	1.17263	1.01375	2.89444
4695	NDUFA2	NADH:ubiquinone oxidoreductase subunit A2	B8|CD14|CIB8	NP_001171941;NP_002479	1	1	0.4038	1	1	0.4197	1	1	0.4004	0.407967	0.0103026	3	3	2.3432	2	2	0.5821	2	2	0.5926	1.17263	1.01375	2.87434
22862	FNDC3A	fibronectin type III domain containing 3A	FNDC3|HUGO|bA203I16.1|bA203I16.5	NP_001073141;NP_001265367;NP_055738	0	0	0.2243	1	1	0.4197	2	2	0.5784	0.407467	0.177367	2	2	1.7917	5	5	1.1195	2	2	0.5926	1.16793	0.601015	2.86633
57708	MIER1	mesoderm induction early response 1, transcriptional regulator	ER1|MI-ER1	NP_001071168;NP_001071169;NP_001071170;NP_001071171;NP_001071172;NP_001139582;NP_001139583;NP_001139584;NP_001139585;NP_001265144;NP_065999	0	0	0.2243	2	2	0.6063	0	0	0.2225	0.351033	0.221069	3	3	2.3432	0	0	0.2239	1	1	0.4103	0.992467	1.17348	2.82727
51611	DPH5	diphthamide biosynthesis 5	AD-018|CGI-30|HSPC143|NPD015	NP_001070862;NP_001070863;NP_057042	0	0	0.2243	0	0	0.2332	1	1	0.4004	0.285967	0.099202	2	2	1.7917	1	1	0.403	0	0	0.2279	0.807533	0.856798	2.82387
339448	C1orf174	chromosome 1 open reading frame 174	-	NP_997239	1	1	0.4038	0	0	0.2332	0	0	0.2225	0.2865	0.101726	1	2	1.7917	1	1	0.403	0	0	0.2279	0.807533	0.856798	2.81862
55813	UTP6	UTP6 small subunit processome component	C17orf40|HCA66	NP_060898	0	0	0.2243	0	0	0.2332	1	1	0.4004	0.285967	0.099202	0	0	0.6891	2	2	0.5821	5	5	1.1398	0.803667	0.295975	2.81035
3832	KIF11	kinesin family member 11	EG5|HKSP|KNSL1|MCLMR|TRIP5	NP_004514	3	3	0.7627	2	2	0.6063	5	5	1.1124	0.827133	0.259129	5	6	3.9978	11	11	2.1945	3	3	0.775	2.32243	1.6152	2.80781
5829	PXN	paxillin	-	NP_001074324;NP_001230685;NP_002850;NP_079433	0	0	0.2243	2	2	0.6063	0	0	0.2225	0.351033	0.221069	1	1	1.2404	5	5	1.1195	1	2	0.5926	0.984167	0.344453	2.80363
57117	INTS12	integrator complex subunit 12	INT12|PHF22|SBBI22	NP_001135943;NP_065128	0	0	0.2243	1	1	0.4197	0	0	0.2225	0.288833	0.113337	2	2	1.7917	0	0	0.2239	1	1	0.4103	0.808633	0.856447	2.79965
23413	NCS1	neuronal calcium sensor 1	FLUP|FREQ	NP_001122298;NP_055101	0	0	0.2243	1	1	0.4197	0	0	0.2225	0.288833	0.113337	2	2	1.7917	1	1	0.403	0	0	0.2279	0.807533	0.856798	2.79585
4684	NCAM1	neural cell adhesion molecule 1	CD56|MSK39|NCAM	NP_000606;NP_001070150;NP_001229536;NP_001229537;NP_851996	2	2	0.5833	2	2	0.6063	1	1	0.4004	0.53	0.112825	3	5	3.4462	3	3	0.7612	0	0	0.2279	1.47843	1.72487	2.7895
11016	ATF7	activating transcription factor 7	ATFA	NP_001123532;NP_001193611;NP_001193612;NP_006847	0	0	0.2243	0	0	0.2332	0	0	0.2225	0.226667	0.00572917	1	1	1.2404	0	0	0.2239	1	1	0.4103	0.624867	0.541154	2.75676
51654	CDK5RAP1	CDK5 regulatory subunit associated protein 1	C20orf34|C42|CGI-05|HSPC167	NP_001265096;NP_001265097;NP_001265098;NP_057166;NP_057492	0	0	0.2243	0	0	0.2332	0	0	0.2225	0.226667	0.00572917	1	1	1.2404	0	0	0.2239	1	1	0.4103	0.624867	0.541154	2.75676
64793	CEP85	centrosomal protein 85kDa	CCDC21	NP_001268446;NP_001268447;NP_001306873;NP_073615	0	0	0.2243	0	0	0.2332	0	0	0.2225	0.226667	0.00572917	1	1	1.2404	0	0	0.2239	1	1	0.4103	0.624867	0.541154	2.75676
1559	CYP2C9	cytochrome P450 family 2 subfamily C member 9	CPC9|CYP2C|CYP2C10|CYPIIC9|P450IIC9	NP_000762	0	0	0.2243	0	0	0.2332	0	0	0.2225	0.226667	0.00572917	1	1	1.2404	0	0	0.2239	1	1	0.4103	0.624867	0.541154	2.75676
80204	FBXO11	F-box protein 11	FBX11|PRMT9|UBR6|UG063H01|VIT1	NP_001177203;NP_079409	0	0	0.2243	0	0	0.2332	0	0	0.2225	0.226667	0.00572917	1	1	1.2404	0	0	0.2239	1	1	0.4103	0.624867	0.541154	2.75676
83903	GSG2	germ cell associated 2 (haspin)	HASPIN	NP_114171	0	0	0.2243	0	0	0.2332	0	0	0.2225	0.226667	0.00572917	1	1	1.2404	0	0	0.2239	1	1	0.4103	0.624867	0.541154	2.75676
29915	HCFC2	host cell factor C2	HCF-2|HCF2	NP_037452	0	0	0.2243	0	0	0.2332	0	0	0.2225	0.226667	0.00572917	1	1	1.2404	0	0	0.2239	1	1	0.4103	0.624867	0.541154	2.75676
56062	KLHL4	kelch like family member 4	DKELCHL|KHL4	NP_061990;NP_476503	0	0	0.2243	0	0	0.2332	0	0	0.2225	0.226667	0.00572917	1	1	1.2404	0	0	0.2239	1	1	0.4103	0.624867	0.541154	2.75676
125113	KRT222	keratin 222, type II	KA21|KRT222P	NP_689562	0	0	0.2243	0	0	0.2332	0	0	0.2225	0.226667	0.00572917	1	1	1.2404	0	0	0.2239	1	1	0.4103	0.624867	0.541154	2.75676
23101	MCF2L2	MCF.2 cell line derived transforming sequence-like 2	ARHGEF22	NP_055893	0	0	0.2243	0	0	0.2332	0	0	0.2225	0.226667	0.00572917	1	1	1.2404	0	0	0.2239	1	1	0.4103	0.624867	0.541154	2.75676
51001	MTERF3	mitochondrial transcription termination factor 3	CGI-12|MTERFD1	NP_001273572;NP_057026	0	0	0.2243	0	0	0.2332	0	0	0.2225	0.226667	0.00572917	1	1	1.2404	0	0	0.2239	1	1	0.4103	0.624867	0.541154	2.75676
10443	N4BP2L2	NEDD4 binding protein 2-like 2	92M18.3|CG005|PFAAP5	NP_001265361;NP_001307765;NP_055702;NP_149102	0	0	0.2243	0	0	0.2332	0	0	0.2225	0.226667	0.00572917	1	1	1.2404	0	0	0.2239	1	1	0.4103	0.624867	0.541154	2.75676
64324	NSD1	nuclear receptor binding SET domain protein 1	ARA267|KMT3B|SOTOS|SOTOS1|STO	NP_071900;NP_758859	0	0	0.2243	0	0	0.2332	0	0	0.2225	0.226667	0.00572917	1	1	1.2404	0	0	0.2239	1	1	0.4103	0.624867	0.541154	2.75676
5293	PIK3CD	phosphatidylinositol-4,5-bisphosphate 3-kinase catalytic subunit delta	APDS|IMD14|P110DELTA|PI3K|p110D	NP_005017	0	0	0.2243	0	0	0.2332	0	0	0.2225	0.226667	0.00572917	1	1	1.2404	0	0	0.2239	1	1	0.4103	0.624867	0.541154	2.75676
55124	PIWIL2	piwi-like RNA-mediated gene silencing 2	CT80|HILI|PIWIL1L|mili	NP_001129193;NP_060538	0	0	0.2243	0	0	0.2332	0	0	0.2225	0.226667	0.00572917	1	1	1.2404	0	0	0.2239	1	1	0.4103	0.624867	0.541154	2.75676
9989	PPP4R1	protein phosphatase 4 regulatory subunit 1	MEG1|PP4(Rmeg)|PP4R1	NP_001035847;NP_005125	0	0	0.2243	0	0	0.2332	0	0	0.2225	0.226667	0.00572917	1	1	1.2404	0	0	0.2239	1	1	0.4103	0.624867	0.541154	2.75676
6317	SERPINB3	serpin peptidase inhibitor, clade B (ovalbumin), member 3	HsT1196|SCC|SCCA-1|SCCA-PD|SCCA1|T4-A	NP_008850	0	0	0.2243	0	0	0.2332	0	0	0.2225	0.226667	0.00572917	1	1	1.2404	0	0	0.2239	1	1	0.4103	0.624867	0.541154	2.75676
58472	SQRDL	sulfide quinone reductase-like (yeast)	CGI-44|PRO1975|SQOR	NP_001258142;NP_067022	0	0	0.2243	0	0	0.2332	0	0	0.2225	0.226667	0.00572917	1	1	1.2404	0	0	0.2239	1	1	0.4103	0.624867	0.541154	2.75676
85378	TUBGCP6	tubulin gamma complex associated protein 6	GCP-6|GCP6|MCCRP|MCCRP1|MCPHCR	NP_065194	0	0	0.2243	0	0	0.2332	0	0	0.2225	0.226667	0.00572917	1	1	1.2404	0	0	0.2239	1	1	0.4103	0.624867	0.541154	2.75676
8408	ULK1	unc-51 like autophagy activating kinase 1	ATG1|ATG1A|UNC51|Unc51.1|hATG1	NP_003556	0	0	0.2243	0	0	0.2332	0	0	0.2225	0.226667	0.00572917	1	1	1.2404	0	0	0.2239	1	1	0.4103	0.624867	0.541154	2.75676
151188	ARL6IP6	ADP ribosylation factor like GTPase 6 interacting protein 6	AIP-6|PFAAP1	NP_689735	0	0	0.2243	0	0	0.2332	0	0	0.2225	0.226667	0.00572917	1	1	1.2404	1	1	0.403	0	0	0.2279	0.623767	0.541149	2.75191
23080	AVL9	AVL9 homolog (S. cerevisiase)	KIAA0241	NP_055875	0	0	0.2243	0	0	0.2332	0	0	0.2225	0.226667	0.00572917	1	1	1.2404	1	1	0.403	0	0	0.2279	0.623767	0.541149	2.75191
8314	BAP1	BRCA1 associated protein 1	HUCEP-13|UCHL2|hucep-6	NP_004647	0	0	0.2243	0	0	0.2332	0	0	0.2225	0.226667	0.00572917	1	1	1.2404	1	1	0.403	0	0	0.2279	0.623767	0.541149	2.75191
127795	C1orf87	chromosome 1 open reading frame 87	CREF	NP_689590	0	0	0.2243	0	0	0.2332	0	0	0.2225	0.226667	0.00572917	1	1	1.2404	1	1	0.403	0	0	0.2279	0.623767	0.541149	2.75191
57118	CAMK1D	calcium/calmodulin dependent protein kinase ID	CKLiK|CaM-K1|CaMKID	NP_065130;NP_705718	0	0	0.2243	0	0	0.2332	0	0	0.2225	0.226667	0.00572917	1	1	1.2404	1	1	0.403	0	0	0.2279	0.623767	0.541149	2.75191
1062	CENPE	centromere protein E	CENP-E|KIF10|MCPH13|PPP1R61	NP_001273663;NP_001804	0	0	0.2243	0	0	0.2332	0	0	0.2225	0.226667	0.00572917	1	1	1.2404	1	1	0.403	0	0	0.2279	0.623767	0.541149	2.75191
10655	DMRT2	doublesex and mab-3 related transcription factor 2	-	NP_001124337;NP_006548;NP_870987	0	0	0.2243	0	0	0.2332	0	0	0.2225	0.226667	0.00572917	1	1	1.2404	1	1	0.403	0	0	0.2279	0.623767	0.541149	2.75191
346007	EYS	eyes shut homolog (Drosophila)	C6orf178|C6orf179|C6orf180|EGFL10|EGFL11|RP25|SPAM|bA166P24.2|bA307F22.3|bA74E24.1|dJ1018A4.2|dJ22I17.2|dJ303F19.1	NP_001136272;NP_001136273;NP_001278938;NP_938024	0	0	0.2243	0	0	0.2332	0	0	0.2225	0.226667	0.00572917	1	1	1.2404	1	1	0.403	0	0	0.2279	0.623767	0.541149	2.75191
2256	FGF11	fibroblast growth factor 11	FGF-11|FHF-3|FHF3	NP_001290389;NP_004103	0	0	0.2243	0	0	0.2332	0	0	0.2225	0.226667	0.00572917	1	1	1.2404	1	1	0.403	0	0	0.2279	0.623767	0.541149	2.75191
3062	HCRTR2	hypocretin (orexin) receptor 2	OX2R	NP_001517	0	0	0.2243	0	0	0.2332	0	0	0.2225	0.226667	0.00572917	1	1	1.2404	1	1	0.403	0	0	0.2279	0.623767	0.541149	2.75191
100505385	IQCJ-SCHIP1	IQCJ-SCHIP1 readthrough	-	NP_001184042;NP_001184043	0	0	0.2243	0	0	0.2332	0	0	0.2225	0.226667	0.00572917	1	1	1.2404	1	1	0.403	0	0	0.2279	0.623767	0.541149	2.75191
91624	NEXN	nexilin (F actin binding protein)	CMH20|NELIN	NP_001165780;NP_653174	0	0	0.2243	0	0	0.2332	0	0	0.2225	0.226667	0.00572917	1	1	1.2404	1	1	0.403	0	0	0.2279	0.623767	0.541149	2.75191
11097	NUPL2	nucleoporin like 2	CG1|NLP-1|NLP_1|hCG1	NP_031368	0	0	0.2243	0	0	0.2332	0	0	0.2225	0.226667	0.00572917	1	1	1.2404	1	1	0.403	0	0	0.2279	0.623767	0.541149	2.75191
9678	PHF14	PHD finger protein 14	-	NP_055475	0	0	0.2243	0	0	0.2332	0	0	0.2225	0.226667	0.00572917	1	1	1.2404	1	1	0.403	0	0	0.2279	0.623767	0.541149	2.75191
10743	RAI1	retinoic acid induced 1	SMCR|SMS	NP_109590	0	0	0.2243	0	0	0.2332	0	0	0.2225	0.226667	0.00572917	1	1	1.2404	1	1	0.403	0	0	0.2279	0.623767	0.541149	2.75191
84501	SPIRE2	spire-type actin nucleation factor 2	Spir-2	NP_115827	0	0	0.2243	0	0	0.2332	0	0	0.2225	0.226667	0.00572917	1	1	1.2404	1	1	0.403	0	0	0.2279	0.623767	0.541149	2.75191
6881	TAF10	TATA-box binding protein associated factor 10	TAF2A|TAF2H|TAFII30	NP_006275	0	0	0.2243	0	0	0.2332	0	0	0.2225	0.226667	0.00572917	1	1	1.2404	1	1	0.403	0	0	0.2279	0.623767	0.541149	2.75191
122402	TDRD9	tudor domain containing 9	C14orf75|HIG-1|NET54	NP_694591	0	0	0.2243	0	0	0.2332	0	0	0.2225	0.226667	0.00572917	1	1	1.2404	1	1	0.403	0	0	0.2279	0.623767	0.541149	2.75191
7468	WHSC1	Wolf-Hirschhorn syndrome candidate 1	MMSET|NSD2|REIIBP|TRX5|WHS	NP_001035889;NP_015627;NP_579877;NP_579878;NP_579889;NP_579890	0	0	0.2243	0	0	0.2332	0	0	0.2225	0.226667	0.00572917	1	1	1.2404	1	1	0.403	0	0	0.2279	0.623767	0.541149	2.75191
22899	ARHGEF15	Rho guanine nucleotide exchange factor 15	ARGEF15|E5|Ephexin5|Vsm-RhoGEF	NP_079290;NP_776089	0	0	0.2243	0	0	0.2332	0	0	0.2225	0.226667	0.00572917	0	0	0.6891	0	0	0.2239	3	4	0.9574	0.623467	0.371128	2.75059
26512	INTS6	integrator complex subunit 6	DBI-1|DDX26|DDX26A|DICE1|HDB|INT6|Notchl2	NP_001035026;NP_001035027;NP_001293020;NP_036273	0	0	0.2243	0	0	0.2332	0	0	0.2225	0.226667	0.00572917	0	0	0.6891	0	0	0.2239	4	4	0.9574	0.623467	0.371128	2.75059
64755	C16orf58	chromosome 16 open reading frame 58	RUS	NP_073581	0	0	0.2243	0	0	0.2332	0	0	0.2225	0.226667	0.00572917	0	0	0.6891	1	1	0.403	3	3	0.775	0.622367	0.194772	2.74574
9400	RECQL5	RecQ helicase-like 5	RECQ5	NP_001003715;NP_001003716;NP_004250	0	0	0.2243	0	0	0.2332	0	0	0.2225	0.226667	0.00572917	0	0	0.6891	1	1	0.403	3	3	0.775	0.622367	0.194772	2.74574
57511	COG6	component of oligomeric golgi complex 6	CDG2L|COD2|SHNS	NP_001138551;NP_065802	0	0	0.2243	0	0	0.2332	0	0	0.2225	0.226667	0.00572917	0	0	0.6891	2	2	0.5821	2	2	0.5926	0.621267	0.0589795	2.74088
63971	KIF13A	kinesin family member 13A	RBKIN|bA500C11.2	NP_001099036;NP_001099037;NP_001099038;NP_001230352;NP_071396	0	0	0.2243	0	0	0.2332	0	0	0.2225	0.226667	0.00572917	0	0	0.6891	2	2	0.5821	2	2	0.5926	0.621267	0.0589795	2.74088
339230	CCDC137	coiled-coil domain containing 137	RaRF	NP_954981	4	5	1.1217	2	2	0.6063	0	0	0.2225	0.650167	0.451202	1	1	1.2404	9	11	2.1945	8	9	1.8694	1.7681	0.485049	2.71946
84816	RTN4IP1	reticulon 4 interacting protein 1	NIMP	NP_001305675;NP_116119	2	2	0.5833	0	0	0.2332	1	1	0.4004	0.405633	0.175109	0	0	0.6891	6	7	1.4778	5	5	1.1398	1.10223	0.39569	2.71731
55602	CDKN2AIP	CDKN2A interacting protein	CARF	NP_001304272;NP_060102	3	3	0.7627	2	2	0.6063	2	2	0.5784	0.649133	0.099336	5	5	3.4462	2	2	0.5821	5	5	1.1398	1.7227	1.51842	2.65385
10456	HAX1	HCLS1 associated protein X-1	HCLSBP1|HS1BP1|SCN3	NP_001018238;NP_006109	1	1	0.4038	1	1	0.4197	0	0	0.2225	0.348667	0.109552	0	0	0.6891	5	5	1.1195	3	4	0.9574	0.922	0.217373	2.64436
64062	RBM26	RNA binding motif protein 26	ARRS2|C13orf10|PPP1R132|PRO1777|SE70-2|ZC3H17	NP_001273560;NP_001273561;NP_071401	3	3	0.7627	0	0	0.2332	3	3	0.7564	0.5841	0.303905	2	2	1.7917	6	6	1.2987	7	7	1.5045	1.53163	0.247617	2.62221
91156	IGFN1	immunoglobulin-like and fibronectin type III domain containing 1	EEF1A2BP1	NP_001158058	0	0	0.2243	0	0	0.2332	1	1	0.4004	0.285967	0.099202	2	2	1.7917	0	0	0.2239	0	0	0.2279	0.747833	0.904017	2.61511
5558	PRIM2	primase, DNA, polypeptide 2 (58kDa)	PRIM2A|p58	NP_000938;NP_001269416;NP_001269417	1	1	0.4038	0	0	0.2332	0	0	0.2225	0.2865	0.101726	2	2	1.7917	0	0	0.2239	0	0	0.2279	0.747833	0.904017	2.61024
8927	BSN	bassoon presynaptic cytomatrix protein	ZNF231	NP_003449	1	1	0.4038	0	0	0.2332	0	0	0.2225	0.2865	0.101726	1	1	1.2404	0	0	0.2239	3	3	0.775	0.746433	0.508852	2.60535
9079	LDB2	LIM domain binding 2	CLIM1|LDB-2|LDB1	NP_001124306;NP_001281;NP_001291363;NP_001291364	0	0	0.2243	0	0	0.2332	1	1	0.4004	0.285967	0.099202	1	1	1.2404	1	2	0.5821	1	1	0.4103	0.744267	0.438167	2.60263
63932	CXorf56	chromosome X open reading frame 56	-	NP_001164040;NP_001164041;NP_071384	1	1	0.4038	0	0	0.2332	0	0	0.2225	0.2865	0.101726	1	1	1.2404	3	3	0.7612	0	0	0.2279	0.743167	0.506491	2.59395
6672	SP100	SP100 nuclear antigen	lysp100b	NP_001073860;NP_001193630;NP_001193631;NP_001193632;NP_001193633;NP_003104	4	7	1.4807	4	8	1.7259	2	3	0.7564	1.321	0.504094	2	11	6.7568	5	10	2.0153	3	7	1.5045	3.42553	2.89624	2.59314
4090	SMAD5	SMAD family member 5	DWFC|JV5-1|MADH5	NP_001001419;NP_001001420;NP_005894	1	1	0.4038	0	0	0.2332	2	2	0.5784	0.405133	0.172604	2	2	1.7917	2	2	0.5821	2	3	0.775	1.0496	0.649875	2.59075
22853	LMTK2	lemur tyrosine kinase 2	AATYK2|BREK|KPI-2|KPI2|LMR2|PPP1R100|cprk	NP_055731	0	0	0.2243	1	1	0.4197	0	0	0.2225	0.288833	0.113337	2	2	1.7917	0	0	0.2239	0	0	0.2279	0.747833	0.904017	2.58915
80305	TRABD	TraB domain containing	LP6054|PP2447	NP_001307413;NP_001307414;NP_001307416;NP_001307417;NP_079480	1	1	0.4038	0	0	0.2332	0	0	0.2225	0.2865	0.101726	0	0	0.6891	2	3	0.7612	3	3	0.775	0.741767	0.0461296	2.58906
23369	PUM2	pumilio RNA binding family member 2	PUMH2|PUML2	NP_001269681;NP_001269719;NP_001269720;NP_056132	5	5	1.1217	2	2	0.6063	1	1	0.4004	0.709467	0.371552	2	4	2.8947	8	8	1.657	4	4	0.9574	1.83637	0.981026	2.58838
85313	PPIL4	peptidylprolyl isomerase like 4	HDCME13P	NP_624311	2	2	0.5833	0	0	0.2332	1	1	0.4004	0.405633	0.175109	2	2	1.7917	2	2	0.5821	3	3	0.775	1.0496	0.649875	2.58756
387104	SOGA3	SOGA family member 3	C6orf174|dJ403A15.3	NP_001012279	1	1	0.4038	0	0	0.2332	0	0	0.2225	0.2865	0.101726	0	0	0.6891	5	5	1.1195	1	1	0.4103	0.739633	0.35729	2.58162
51567	TDP2	tyrosyl-DNA phosphodiesterase 2	AD022|EAP2|EAPII|TTRAP|dJ30M3.3|hTDP2	NP_057698	0	0	0.2243	1	1	0.4197	2	2	0.5784	0.407467	0.177367	1	2	1.7917	0	0	0.2239	5	5	1.1398	1.0518	0.787596	2.58132
26088	GGA1	golgi-associated, gamma adaptin ear containing, ARF binding protein 1	-	NP_001001560;NP_001166158;NP_001166159;NP_037497	0	0	0.2243	1	1	0.4197	0	0	0.2225	0.288833	0.113337	1	1	1.2404	1	1	0.403	2	2	0.5926	0.745333	0.439096	2.5805
84779	NAA11	N(alpha)-acetyltransferase 11, NatA catalytic subunit	ARD1B|ARD2|hARD2	NP_116082	2	2	0.5833	0	0	0.2332	2	3	0.7564	0.5243	0.266543	2	3	2.3432	4	5	1.1195	2	2	0.5926	1.35177	0.898115	2.57823
3655	ITGA6	integrin subunit alpha 6	CD49f|ITGA6B|VLA-6	NP_000201;NP_001073286;NP_001303235	0	0	0.2243	1	1	0.4197	0	0	0.2225	0.288833	0.113337	1	1	1.2404	2	2	0.5821	1	1	0.4103	0.744267	0.438167	2.5768
65263	PYCRL	pyrroline-5-carboxylate reductase-like	PYCR3	NP_075566	0	0	0.2243	1	1	0.4197	0	0	0.2225	0.288833	0.113337	1	1	1.2404	3	3	0.7612	0	0	0.2279	0.743167	0.506491	2.57299
23759	PPIL2	peptidylprolyl isomerase like 2	CYC4|CYP60|Cyp-60|UBOX7|hCyP-60	NP_001304925;NP_055152;NP_680480;NP_680481	0	0	0.2243	1	1	0.4197	0	0	0.2225	0.288833	0.113337	0	0	0.6891	2	2	0.5821	4	4	0.9574	0.742867	0.193341	2.57196
64328	XPO4	exportin 4	exp4	NP_071904	1	1	0.4038	1	1	0.4197	1	1	0.4004	0.407967	0.0103026	0	0	0.6891	7	7	1.4778	4	4	0.9574	1.04143	0.401009	2.55274
51106	TFB1M	transcription factor B1, mitochondrial	CGI-75|CGI75|mtTFB|mtTFB1	NP_057104	1	1	0.4038	2	2	0.6063	2	2	0.5784	0.5295	0.10975	0	0	0.6891	7	7	1.4778	9	9	1.8694	1.34543	0.60118	2.54095
22904	SBNO2	strawberry notch homolog 2 (Drosophila)	KIAA0963|SNO|STNO	NP_001093592;NP_055778	1	1	0.4038	0	0	0.2332	3	3	0.7564	0.464467	0.266824	3	4	2.8947	1	1	0.403	0	0	0.2279	1.1752	1.4917	2.53021
25942	SIN3A	SIN3 transcription regulator family member A	-	NP_001138829;NP_001138830;NP_056292	3	3	0.7627	0	0	0.2332	3	3	0.7564	0.5841	0.303905	3	4	2.8947	5	5	1.1195	1	1	0.4103	1.47483	1.27975	2.52497
2801	GOLGA2	golgin A2	GM130	NP_004477	3	3	0.7627	1	1	0.4197	4	4	0.9344	0.7056	0.262058	3	5	3.4462	6	6	1.2987	2	2	0.5926	1.77917	1.48623	2.52149
5981	RFC1	replication factor C subunit 1	A1|MHCBFB|PO-GA|RECC1|RFC|RFC140	NP_001191676;NP_002904	5	5	1.1217	1	1	0.4197	4	4	0.9344	0.825267	0.363502	4	4	2.8947	12	12	2.3737	4	4	0.9574	2.07527	1.00254	2.51466
30062	RAX	retina and anterior neural fold homeobox	MCOP3|RX	NP_038463	1	1	0.4038	0	0	0.2332	1	1	0.4004	0.3458	0.0975293	2	2	1.7917	1	1	0.403	1	1	0.4103	0.868333	0.799667	2.51109
121441	NEDD1	neural precursor cell expressed, developmentally down-regulated 1	GCP-WD|TUBGCP7	NP_001128647;NP_001128648;NP_001128649;NP_690869	2	2	0.5833	0	0	0.2332	0	0	0.2225	0.346333	0.205289	2	2	1.7917	0	0	0.2239	2	2	0.5926	0.8694	0.819733	2.5103
84946	LTV1	LTV1 ribosome biogenesis factor	C6orf93|dJ468K18.4	NP_116249	2	2	0.5833	0	0	0.2332	0	0	0.2225	0.346333	0.205289	2	2	1.7917	1	1	0.403	1	1	0.4103	0.868333	0.799667	2.50722
112939	NACC1	nucleus accumbens associated 1, BEN and BTB (POZ) domain containing	BEND8|BTBD14B|BTBD30|NAC-1|NAC1	NP_443108	2	2	0.5833	0	0	0.2332	0	0	0.2225	0.346333	0.205289	2	2	1.7917	1	1	0.403	1	1	0.4103	0.868333	0.799667	2.50722
23168	RTF1	RTF1 homolog, Paf1/RNA polymerase II complex component	GTL7|KIAA0252	NP_055953	4	4	0.9422	2	2	0.6063	5	5	1.1124	0.886967	0.257531	6	7	4.5495	4	4	0.9404	5	5	1.1398	2.2099	2.0286	2.49153
8788	DLK1	delta-like 1 homolog (Drosophila)	DLK|DLK-1|Delta1|FA1|PREF1|Pref-1|ZOG|pG2	NP_001304101;NP_003827	1	1	0.4038	1	1	0.4197	0	0	0.2225	0.348667	0.109552	2	2	1.7917	1	1	0.403	1	1	0.4103	0.868333	0.799667	2.49044
10403	NDC80	NDC80 kinetochore complex component	HEC|HEC1|HsHec1|KNTC2|TID3|hsNDC80	NP_006092	1	1	0.4038	1	1	0.4197	0	0	0.2225	0.348667	0.109552	2	2	1.7917	1	1	0.403	1	1	0.4103	0.868333	0.799667	2.49044
256536	TCERG1L	transcription elongation regulator 1 like	-	NP_777597	1	1	0.4038	1	1	0.4197	0	0	0.2225	0.348667	0.109552	2	2	1.7917	1	1	0.403	1	1	0.4103	0.868333	0.799667	2.49044
441376	AARD	alanine and arginine rich domain containing protein	C8orf85	NP_001020528	0	0	0.2243	0	0	0.2332	0	0	0.2225	0.226667	0.00572917	1	1	1.2404	0	0	0.2239	0	0	0.2279	0.564067	0.585725	2.48853
85320	ABCC11	ATP binding cassette subfamily C member 11	EWWD|MRP8|WW	NP_115972;NP_149163;NP_660187	0	0	0.2243	0	0	0.2332	0	0	0.2225	0.226667	0.00572917	1	1	1.2404	0	0	0.2239	0	0	0.2279	0.564067	0.585725	2.48853
368	ABCC6	ATP binding cassette subfamily C member 6	ABC34|ARA|EST349056|GACI2|MLP1|MOAT-E|MOATE|MRP6|PXE|PXE1|URG7	NP_001072996;NP_001162	0	0	0.2243	0	0	0.2332	0	0	0.2225	0.226667	0.00572917	1	1	1.2404	0	0	0.2239	0	0	0.2279	0.564067	0.585725	2.48853
23527	ACAP2	ArfGAP with coiled-coil, ankyrin repeat and PH domains 2	CENTB2|CNT-B2	NP_036419	0	0	0.2243	0	0	0.2332	0	0	0.2225	0.226667	0.00572917	1	1	1.2404	0	0	0.2239	0	0	0.2279	0.564067	0.585725	2.48853
177	AGER	advanced glycosylation end product-specific receptor	RAGE	NP_001127;NP_001193858;NP_001193861;NP_001193863;NP_001193865;NP_001193869;NP_001193883;NP_001193895;NP_751947	0	0	0.2243	0	0	0.2332	0	0	0.2225	0.226667	0.00572917	1	1	1.2404	0	0	0.2239	0	0	0.2279	0.564067	0.585725	2.48853
239	ALOX12	arachidonate 12-lipoxygenase	12-LOX|12S-LOX|LOG12	NP_000688	0	0	0.2243	0	0	0.2332	0	0	0.2225	0.226667	0.00572917	1	1	1.2404	0	0	0.2239	0	0	0.2279	0.564067	0.585725	2.48853
91056	AP5B1	adaptor related protein complex 5, beta 1 subunit	AP-5|PP1030	NP_612377	0	0	0.2243	0	0	0.2332	0	0	0.2225	0.226667	0.00572917	1	1	1.2404	0	0	0.2239	0	0	0.2279	0.564067	0.585725	2.48853
84334	APOPT1	apoptogenic 1, mitochondrial	APOP|APOP1|C14orf153	NP_001289581;NP_001289582;NP_001289583;NP_115750	0	0	0.2243	0	0	0.2332	0	0	0.2225	0.226667	0.00572917	1	1	1.2404	0	0	0.2239	0	0	0.2279	0.564067	0.585725	2.48853
398	ARHGDIG	Rho GDP dissociation inhibitor (GDI) gamma	RHOGDI-3	NP_001167	0	0	0.2243	0	0	0.2332	0	0	0.2225	0.226667	0.00572917	1	1	1.2404	0	0	0.2239	0	0	0.2279	0.564067	0.585725	2.48853
646450	ARIH2OS	ariadne homolog 2 opposite strand	C3orf71	NP_001116512	0	0	0.2243	0	0	0.2332	0	0	0.2225	0.226667	0.00572917	1	1	1.2404	0	0	0.2239	0	0	0.2279	0.564067	0.585725	2.48853
23439	ATP1B4	ATPase, Na+/K+ transporting, beta 4 polypeptide	-	NP_001135919;NP_036201	0	0	0.2243	0	0	0.2332	0	0	0.2225	0.226667	0.00572917	1	1	1.2404	0	0	0.2239	0	0	0.2279	0.564067	0.585725	2.48853
27087	B3GAT1	beta-1,3-glucuronyltransferase 1	CD57|GLCATP|GLCUATP|HNK1|LEU7|NK-1|NK1	NP_061114;NP_473366	0	0	0.2243	0	0	0.2332	0	0	0.2225	0.226667	0.00572917	1	1	1.2404	0	0	0.2239	0	0	0.2279	0.564067	0.585725	2.48853
11041	B4GAT1	beta-1,4-glucuronyltransferase 1	B3GN-T1|B3GNT1|B3GNT6|BETA3GNTI|MDDGA13|iGAT|iGNT	NP_006867	0	0	0.2243	0	0	0.2332	0	0	0.2225	0.226667	0.00572917	1	1	1.2404	0	0	0.2239	0	0	0.2279	0.564067	0.585725	2.48853
57597	BAHCC1	BAH domain and coiled-coil containing 1	BAHD2	NP_001278253	0	0	0.2243	0	0	0.2332	0	0	0.2225	0.226667	0.00572917	1	1	1.2404	0	0	0.2239	0	0	0.2279	0.564067	0.585725	2.48853
112401	BIRC8	baculoviral IAP repeat containing 8	ILP-2|ILP2|hILP2	NP_203127	0	0	0.2243	0	0	0.2332	0	0	0.2225	0.226667	0.00572917	1	1	1.2404	0	0	0.2239	0	0	0.2279	0.564067	0.585725	2.48853
79946	C10orf95	chromosome 10 open reading frame 95	-	NP_079162	0	0	0.2243	0	0	0.2332	0	0	0.2225	0.226667	0.00572917	1	1	1.2404	0	0	0.2239	0	0	0.2279	0.564067	0.585725	2.48853
84326	C16orf13	chromosome 16 open reading frame 13	JFP2	NP_001035250;NP_001035251;NP_001035252;NP_001035255;NP_001275639;NP_115742	0	0	0.2243	0	0	0.2332	0	0	0.2225	0.226667	0.00572917	1	1	1.2404	0	0	0.2239	0	0	0.2279	0.564067	0.585725	2.48853
123775	C16orf46	chromosome 16 open reading frame 46	-	NP_001094343;NP_689550	0	0	0.2243	0	0	0.2332	0	0	0.2225	0.226667	0.00572917	1	1	1.2404	0	0	0.2239	0	0	0.2279	0.564067	0.585725	2.48853
284083	C17orf47	chromosome 17 open reading frame 47	-	NP_001033793	0	0	0.2243	0	0	0.2332	0	0	0.2225	0.226667	0.00572917	1	1	1.2404	0	0	0.2239	0	0	0.2279	0.564067	0.585725	2.48853
124583	CANT1	calcium activated nucleotidase 1	DBQD|SCAN-1|SCAN1|SHAPY	NP_001153244;NP_001153245;NP_620148	0	0	0.2243	0	0	0.2332	0	0	0.2225	0.226667	0.00572917	1	1	1.2404	0	0	0.2239	0	0	0.2279	0.564067	0.585725	2.48853
440854	CAPN14	calpain 14	-	NP_001138594;NP_001308199	0	0	0.2243	0	0	0.2332	0	0	0.2225	0.226667	0.00572917	1	1	1.2404	0	0	0.2239	0	0	0.2279	0.564067	0.585725	2.48853
84698	CAPS2	calcyphosine 2	UG0636c06	NP_001273476;NP_001273477;NP_001273478;NP_115995	0	0	0.2243	0	0	0.2332	0	0	0.2225	0.226667	0.00572917	1	1	1.2404	0	0	0.2239	0	0	0.2279	0.564067	0.585725	2.48853
339965	CCDC158	coiled-coil domain containing 158	-	NP_001036249	0	0	0.2243	0	0	0.2332	0	0	0.2225	0.226667	0.00572917	1	1	1.2404	0	0	0.2239	0	0	0.2279	0.564067	0.585725	2.48853
164127	CCDC185	coiled-coil domain containing 185	C1orf65	NP_689823	0	0	0.2243	0	0	0.2332	0	0	0.2225	0.226667	0.00572917	1	1	1.2404	0	0	0.2239	0	0	0.2279	0.564067	0.585725	2.48853
994	CDC25B	cell division cycle 25B	-	NP_001274445;NP_001274446;NP_001274447;NP_001274448;NP_001274449;NP_001274451;NP_001274453;NP_004349;NP_068658;NP_068659	0	0	0.2243	0	0	0.2332	0	0	0.2225	0.226667	0.00572917	1	1	1.2404	0	0	0.2239	0	0	0.2279	0.564067	0.585725	2.48853
1010	CDH12	cadherin 12	CDHB	NP_001304156;NP_001304157;NP_004052	0	0	0.2243	0	0	0.2332	0	0	0.2225	0.226667	0.00572917	1	1	1.2404	0	0	0.2239	0	0	0.2279	0.564067	0.585725	2.48853
1041	CDSN	corneodesmosin	HTSS|HTSS1|HYPT2|PSS|PSS1|S	NP_001255	0	0	0.2243	0	0	0.2332	0	0	0.2225	0.226667	0.00572917	1	1	1.2404	0	0	0.2239	0	0	0.2279	0.564067	0.585725	2.48853
1952	CELSR2	cadherin EGF LAG seven-pass G-type receptor 2	ADGRC2|CDHF10|EGFL2|Flamingo1|MEGF3	NP_001399	0	0	0.2243	0	0	0.2332	0	0	0.2225	0.226667	0.00572917	1	1	1.2404	0	0	0.2239	0	0	0.2279	0.564067	0.585725	2.48853
54480	CHPF2	chondroitin polymerizing factor 2	CSGLCA-T|CSGlcAT|ChSy-3|chPF-2	NP_001271224;NP_061888	0	0	0.2243	0	0	0.2332	0	0	0.2225	0.226667	0.00572917	1	1	1.2404	0	0	0.2239	0	0	0.2279	0.564067	0.585725	2.48853
1129	CHRM2	cholinergic receptor, muscarinic 2	HM2	NP_000730;NP_001006627;NP_001006628;NP_001006629;NP_001006630;NP_001006631;NP_001006632;NP_001006633	0	0	0.2243	0	0	0.2332	0	0	0.2225	0.226667	0.00572917	1	1	1.2404	0	0	0.2239	0	0	0.2279	0.564067	0.585725	2.48853
497190	CLEC18B	C-type lectin domain family 18 member B	MRCL2	NP_001011880	0	0	0.2243	0	0	0.2332	0	0	0.2225	0.226667	0.00572917	1	1	1.2404	0	0	0.2239	0	0	0.2279	0.564067	0.585725	2.48853
91522	COL23A1	collagen type XXIII alpha 1	-	NP_775736	0	0	0.2243	0	0	0.2332	0	0	0.2225	0.226667	0.00572917	1	1	1.2404	0	0	0.2239	0	0	0.2279	0.564067	0.585725	2.48853
1295	COL8A1	collagen type VIII alpha 1	C3orf7	NP_001841;NP_065084	0	0	0.2243	0	0	0.2332	0	0	0.2225	0.226667	0.00572917	1	1	1.2404	0	0	0.2239	0	0	0.2279	0.564067	0.585725	2.48853
23127	COLGALT2	collagen beta(1-O)galactosyltransferase 2	C1orf17|GLT25D2	NP_001290349;NP_001290350;NP_055916	0	0	0.2243	0	0	0.2332	0	0	0.2225	0.226667	0.00572917	1	1	1.2404	0	0	0.2239	0	0	0.2279	0.564067	0.585725	2.48853
9244	CRLF1	cytokine receptor-like factor 1	CISS|CISS1|CLF|CLF-1|NR6|zcytor5	NP_004741	0	0	0.2243	0	0	0.2332	0	0	0.2225	0.226667	0.00572917	1	1	1.2404	0	0	0.2239	0	0	0.2279	0.564067	0.585725	2.48853
441294	CTAGE15	CTAGE family member 15	CTAGE15P|cTAGE-15	NP_001008747	0	0	0.2243	0	0	0.2332	0	0	0.2225	0.226667	0.00572917	1	1	1.2404	0	0	0.2239	0	0	0.2279	0.564067	0.585725	2.48853
340307	CTAGE6	CTAGE family member 6	CTAGE6P	NP_848656	0	0	0.2243	0	0	0.2332	0	0	0.2225	0.226667	0.00572917	1	1	1.2404	0	0	0.2239	0	0	0.2279	0.564067	0.585725	2.48853
256643	CXorf23	chromosome X open reading frame 23	-	NP_938020	0	0	0.2243	0	0	0.2332	0	0	0.2225	0.226667	0.00572917	1	1	1.2404	0	0	0.2239	0	0	0.2279	0.564067	0.585725	2.48853
340602	CXorf67	chromosome X open reading frame 67	-	NP_981952	0	0	0.2243	0	0	0.2332	0	0	0.2225	0.226667	0.00572917	1	1	1.2404	0	0	0.2239	0	0	0.2279	0.564067	0.585725	2.48853
1557	CYP2C19	cytochrome P450 family 2 subfamily C member 19	CPCJ|CYP2C|CYPIIC17|CYPIIC19|P450C2C|P450IIC19	NP_000760	0	0	0.2243	0	0	0.2332	0	0	0.2225	0.226667	0.00572917	1	1	1.2404	0	0	0.2239	0	0	0.2279	0.564067	0.585725	2.48853
1581	CYP7A1	cytochrome P450 family 7 subfamily A member 1	CP7A|CYP7|CYPVII	NP_000771	0	0	0.2243	0	0	0.2332	0	0	0.2225	0.226667	0.00572917	1	1	1.2404	0	0	0.2239	0	0	0.2279	0.564067	0.585725	2.48853
340578	DCAF12L2	DDB1 and CUL4 associated factor 12-like 2	WDR40C	NP_001013650	0	0	0.2243	0	0	0.2332	0	0	0.2225	0.226667	0.00572917	1	1	1.2404	0	0	0.2239	0	0	0.2279	0.564067	0.585725	2.48853
728597	DCDC2C	doublecortin domain containing 2C	-	NP_001274373	0	0	0.2243	0	0	0.2332	0	0	0.2225	0.226667	0.00572917	1	1	1.2404	0	0	0.2239	0	0	0.2279	0.564067	0.585725	2.48853
127579	DCST2	DC-STAMP domain containing 2	-	NP_653223	0	0	0.2243	0	0	0.2332	0	0	0.2225	0.226667	0.00572917	1	1	1.2404	0	0	0.2239	0	0	0.2279	0.564067	0.585725	2.48853
162989	DEDD2	death effector domain containing 2	FLAME-3	NP_001257543;NP_001257544;NP_579874	0	0	0.2243	0	0	0.2332	0	0	0.2225	0.226667	0.00572917	1	1	1.2404	0	0	0.2239	0	0	0.2279	0.564067	0.585725	2.48853
117285	DEFB118	defensin beta 118	C20orf63|DEFB-18|ESC42|ESP13.6	NP_473453	0	0	0.2243	0	0	0.2332	0	0	0.2225	0.226667	0.00572917	1	1	1.2404	0	0	0.2239	0	0	0.2279	0.564067	0.585725	2.48853
3338	DNAJC4	DnaJ heat shock protein family (Hsp40) member C4	DANJC4|HSPF2|MCG18	NP_001294909;NP_001294910;NP_005519	0	0	0.2243	0	0	0.2332	0	0	0.2225	0.226667	0.00572917	1	1	1.2404	0	0	0.2239	0	0	0.2279	0.564067	0.585725	2.48853
1805	DPT	dermatopontin	TRAMP	NP_001928	0	0	0.2243	0	0	0.2332	0	0	0.2225	0.226667	0.00572917	1	1	1.2404	0	0	0.2239	0	0	0.2279	0.564067	0.585725	2.48853
8445	DYRK2	dual specificity tyrosine-(Y)-phosphorylation regulated kinase 2	-	NP_003574;NP_006473	0	0	0.2243	0	0	0.2332	0	0	0.2225	0.226667	0.00572917	1	1	1.2404	0	0	0.2239	0	0	0.2279	0.564067	0.585725	2.48853
1877	E4F1	E4F transcription factor 1	E4F	NP_001275705;NP_001275707;NP_004415	0	0	0.2243	0	0	0.2332	0	0	0.2225	0.226667	0.00572917	1	1	1.2404	0	0	0.2239	0	0	0.2279	0.564067	0.585725	2.48853
80303	EFHD1	EF-hand domain family member D1	MST133|MSTP133|PP3051|SWS2	NP_001230181;NP_001295324;NP_079478	0	0	0.2243	0	0	0.2332	0	0	0.2225	0.226667	0.00572917	1	1	1.2404	0	0	0.2239	0	0	0.2279	0.564067	0.585725	2.48853
1949	EFNB3	ephrin-B3	EFL6|EPLG8|LERK8	NP_001397	0	0	0.2243	0	0	0.2332	0	0	0.2225	0.226667	0.00572917	1	1	1.2404	0	0	0.2239	0	0	0.2279	0.564067	0.585725	2.48853
1999	ELF3	E74-like factor 3 (ets domain transcription factor, epithelial-specific )	EPR-1|ERT|ESE-1|ESX	NP_001107781;NP_004424	0	0	0.2243	0	0	0.2332	0	0	0.2225	0.226667	0.00572917	1	1	1.2404	0	0	0.2239	0	0	0.2279	0.564067	0.585725	2.48853
55556	ENOSF1	enolase superfamily member 1	RTS|TYMSAS	NP_001119595;NP_001305688;NP_001305689;NP_059982;NP_974487	0	0	0.2243	0	0	0.2332	0	0	0.2225	0.226667	0.00572917	1	1	1.2404	0	0	0.2239	0	0	0.2279	0.564067	0.585725	2.48853
283849	EXOC3L1	exocyst complex component 3-like 1	EXOC3L	NP_848611	0	0	0.2243	0	0	0.2332	0	0	0.2225	0.226667	0.00572917	1	1	1.2404	0	0	0.2239	0	0	0.2279	0.564067	0.585725	2.48853
9715	FAM131B	family with sequence similarity 131 member B	-	NP_001026860;NP_001265226;NP_055505	0	0	0.2243	0	0	0.2332	0	0	0.2225	0.226667	0.00572917	1	1	1.2404	0	0	0.2239	0	0	0.2279	0.564067	0.585725	2.48853
134145	FAM173B	family with sequence similarity 173 member B	JS-2	NP_001245317;NP_001245318;NP_954584	0	0	0.2243	0	0	0.2332	0	0	0.2225	0.226667	0.00572917	1	1	1.2404	0	0	0.2239	0	0	0.2279	0.564067	0.585725	2.48853
8603	FAM193A	family with sequence similarity 193 member A	C4orf8|RES4-22	NP_001243595;NP_001243596;NP_001243597;NP_003695	0	0	0.2243	0	0	0.2332	0	0	0.2225	0.226667	0.00572917	1	1	1.2404	0	0	0.2239	0	0	0.2279	0.564067	0.585725	2.48853
63939	FAM217B	family with sequence similarity 217 member B	C20orf177|dJ551D2.5	NP_001177755;NP_001177756;NP_071389	0	0	0.2243	0	0	0.2332	0	0	0.2225	0.226667	0.00572917	1	1	1.2404	0	0	0.2239	0	0	0.2279	0.564067	0.585725	2.48853
138311	FAM69B	family with sequence similarity 69 member B	C9orf136|pp6977	NP_689634	0	0	0.2243	0	0	0.2332	0	0	0.2225	0.226667	0.00572917	1	1	1.2404	0	0	0.2239	0	0	0.2279	0.564067	0.585725	2.48853
84188	FAR1	fatty acyl-CoA reductase 1	MLSTD2|PFCRD|SDR10E1	NP_115604	0	0	0.2243	0	0	0.2332	0	0	0.2225	0.226667	0.00572917	1	1	1.2404	0	0	0.2239	0	0	0.2279	0.564067	0.585725	2.48853
96459	FNIP1	folliculin interacting protein 1	-	NP_001008738;NP_588613	0	0	0.2243	0	0	0.2332	0	0	0.2225	0.226667	0.00572917	1	1	1.2404	0	0	0.2239	0	0	0.2279	0.564067	0.585725	2.48853
2492	FSHR	follicle stimulating hormone receptor	FSHR1|FSHRO|LGR1|ODG1	NP_000136;NP_852111	0	0	0.2243	0	0	0.2332	0	0	0.2225	0.226667	0.00572917	1	1	1.2404	0	0	0.2239	0	0	0.2279	0.564067	0.585725	2.48853
2595	GANC	glucosidase, alpha; neutral C	-	NP_001288338;NP_001288339;NP_937784	0	0	0.2243	0	0	0.2332	0	0	0.2225	0.226667	0.00572917	1	1	1.2404	0	0	0.2239	0	0	0.2279	0.564067	0.585725	2.48853
10634	GAS2L1	growth arrest specific 2 like 1	GAR22	NP_001265659;NP_006469;NP_689422;NP_689423	0	0	0.2243	0	0	0.2332	0	0	0.2225	0.226667	0.00572917	1	1	1.2404	0	0	0.2239	0	0	0.2279	0.564067	0.585725	2.48853
78997	GDAP1L1	ganglioside induced differentiation associated protein 1-like 1	dJ881L22.1|dJ995J12.1.1	NP_001243666;NP_001243667;NP_001243668;NP_001243669;NP_076939	0	0	0.2243	0	0	0.2332	0	0	0.2225	0.226667	0.00572917	1	1	1.2404	0	0	0.2239	0	0	0.2279	0.564067	0.585725	2.48853
27165	GLS2	glutaminase 2	GA|GLS|LGA|hLGA	NP_001267725;NP_001267726;NP_001267727;NP_037399	0	0	0.2243	0	0	0.2332	0	0	0.2225	0.226667	0.00572917	1	1	1.2404	0	0	0.2239	0	0	0.2279	0.564067	0.585725	2.48853
2760	GM2A	GM2 ganglioside activator	GM2-AP|SAP-3	NP_000396;NP_001161079	0	0	0.2243	0	0	0.2332	0	0	0.2225	0.226667	0.00572917	1	1	1.2404	0	0	0.2239	0	0	0.2279	0.564067	0.585725	2.48853
2965	GTF2H1	general transcription factor IIH subunit 1	BTF2|P62|TFB1|TFIIH	NP_001135779;NP_005307	0	0	0.2243	0	0	0.2332	0	0	0.2225	0.226667	0.00572917	1	1	1.2404	0	0	0.2239	0	0	0.2279	0.564067	0.585725	2.48853
51512	GTSE1	G2 and S-phase expressed 1	B99	NP_057510	0	0	0.2243	0	0	0.2332	0	0	0.2225	0.226667	0.00572917	1	1	1.2404	0	0	0.2239	0	0	0.2279	0.564067	0.585725	2.48853
84667	HES7	hes family bHLH transcription factor 7	SCDO4|bHLHb37	NP_001159439;NP_115969	0	0	0.2243	0	0	0.2332	0	0	0.2225	0.226667	0.00572917	1	1	1.2404	0	0	0.2239	0	0	0.2279	0.564067	0.585725	2.48853
54768	HYDIN	HYDIN, axonemal central pair apparatus protein	CILD5|HYDIN1|HYDIN2|PPP1R31	NP_001185471;NP_001185472;NP_001257903;NP_060028	0	0	0.2243	0	0	0.2332	0	0	0.2225	0.226667	0.00572917	1	1	1.2404	0	0	0.2239	0	0	0.2279	0.564067	0.585725	2.48853
3448	IFNA14	interferon, alpha 14	IFN-alphaH|LEIF2H	NP_002163	0	0	0.2243	0	0	0.2332	0	0	0.2225	0.226667	0.00572917	1	1	1.2404	0	0	0.2239	0	0	0.2279	0.564067	0.585725	2.48853
3475	IFRD1	interferon-related developmental regulator 1	PC4|TIS7	NP_001007246;NP_001184008;NP_001184009;NP_001541	0	0	0.2243	0	0	0.2332	0	0	0.2225	0.226667	0.00572917	1	1	1.2404	0	0	0.2239	0	0	0.2279	0.564067	0.585725	2.48853
50616	IL22	interleukin 22	IL-21|IL-22|IL-D110|IL-TIF|ILTIF|TIFIL-23|TIFa|zcyto18	NP_065386	0	0	0.2243	0	0	0.2332	0	0	0.2225	0.226667	0.00572917	1	1	1.2404	0	0	0.2239	0	0	0.2279	0.564067	0.585725	2.48853
92105	INTS4	integrator complex subunit 4	INT4|MST093	NP_291025	0	0	0.2243	0	0	0.2332	0	0	0.2225	0.226667	0.00572917	1	1	1.2404	0	0	0.2239	0	0	0.2279	0.564067	0.585725	2.48853
654502	IQCJ	IQ motif containing J	-	NP_001036170;NP_001036171;NP_001184029	0	0	0.2243	0	0	0.2332	0	0	0.2225	0.226667	0.00572917	1	1	1.2404	0	0	0.2239	0	0	0.2279	0.564067	0.585725	2.48853
9922	IQSEC1	IQ motif and Sec7 domain 1	ARF-GEP100|ARFGEP100|BRAG2|GEP100	NP_001127854;NP_055684	0	0	0.2243	0	0	0.2332	0	0	0.2225	0.226667	0.00572917	1	1	1.2404	0	0	0.2239	0	0	0.2279	0.564067	0.585725	2.48853
8471	IRS4	insulin receptor substrate 4	IRS-4|PY160	NP_003595	0	0	0.2243	0	0	0.2332	0	0	0.2225	0.226667	0.00572917	1	1	1.2404	0	0	0.2239	0	0	0.2279	0.564067	0.585725	2.48853
23247	KIAA0556	KIAA0556	-	NP_056017	0	0	0.2243	0	0	0.2332	0	0	0.2225	0.226667	0.00572917	1	1	1.2404	0	0	0.2239	0	0	0.2279	0.564067	0.585725	2.48853
25984	KRT23	keratin 23, type I	CK23|HAIK1|K23	NP_001269362;NP_056330	0	0	0.2243	0	0	0.2332	0	0	0.2225	0.226667	0.00572917	1	1	1.2404	0	0	0.2239	0	0	0.2279	0.564067	0.585725	2.48853
283455	KSR2	kinase suppressor of ras 2	-	NP_775869	0	0	0.2243	0	0	0.2332	0	0	0.2225	0.226667	0.00572917	1	1	1.2404	0	0	0.2239	0	0	0.2279	0.564067	0.585725	2.48853
3911	LAMA5	laminin subunit alpha 5	-	NP_005551	0	0	0.2243	0	0	0.2332	0	0	0.2225	0.226667	0.00572917	1	1	1.2404	0	0	0.2239	0	0	0.2279	0.564067	0.585725	2.48853
3991	LIPE	lipase, hormone-sensitive	AOMS4|FPLD6|HSL|LHS	NP_005348	0	0	0.2243	0	0	0.2332	0	0	0.2225	0.226667	0.00572917	1	1	1.2404	0	0	0.2239	0	0	0.2279	0.564067	0.585725	2.48853
10046	MAMLD1	mastermind like domain containing 1	CG1|CXorf6|F18|HYSP2	NP_001170936;NP_001170937;NP_005482	0	0	0.2243	0	0	0.2332	0	0	0.2225	0.226667	0.00572917	1	1	1.2404	0	0	0.2239	0	0	0.2279	0.564067	0.585725	2.48853
91749	MFSD4B	major facilitator superfamily domain containing 4B	KIAA1919|NaGLT1	NP_699200	0	0	0.2243	0	0	0.2332	0	0	0.2225	0.226667	0.00572917	1	1	1.2404	0	0	0.2239	0	0	0.2279	0.564067	0.585725	2.48853
22877	MLXIP	MLX interacting protein	MIR|MONDOA|bHLHe36	NP_055753	0	0	0.2243	0	0	0.2332	0	0	0.2225	0.226667	0.00572917	1	1	1.2404	0	0	0.2239	0	0	0.2279	0.564067	0.585725	2.48853
64066	MMP27	matrix metallopeptidase 27	MMP-27	NP_071405	0	0	0.2243	0	0	0.2332	0	0	0.2225	0.226667	0.00572917	1	1	1.2404	0	0	0.2239	0	0	0.2279	0.564067	0.585725	2.48853
4350	MPG	N-methylpurine DNA glycosylase	AAG|ADPG|APNG|CRA36.1|MDG|Mid1|PIG11|PIG16|anpg	NP_001015052;NP_001015054;NP_002425	0	0	0.2243	0	0	0.2332	0	0	0.2225	0.226667	0.00572917	1	1	1.2404	0	0	0.2239	0	0	0.2279	0.564067	0.585725	2.48853
54587	MXRA8	matrix-remodelling associated 8	-	NP_001269511;NP_001269512;NP_001269513;NP_001269514;NP_115724	0	0	0.2243	0	0	0.2332	0	0	0.2225	0.226667	0.00572917	1	1	1.2404	0	0	0.2239	0	0	0.2279	0.564067	0.585725	2.48853
4606	MYBPC2	myosin binding protein C, fast type	MYBPC|MYBPCF	NP_004524	0	0	0.2243	0	0	0.2332	0	0	0.2225	0.226667	0.00572917	1	1	1.2404	0	0	0.2239	0	0	0.2279	0.564067	0.585725	2.48853
4607	MYBPC3	myosin binding protein C, cardiac	CMD1MM|CMH4|FHC|LVNC10|MYBP-C	NP_000247	0	0	0.2243	0	0	0.2332	0	0	0.2225	0.226667	0.00572917	1	1	1.2404	0	0	0.2239	0	0	0.2279	0.564067	0.585725	2.48853
344148	NCKAP5	NCK associated protein 5	ERIH1|ERIH2|NAP5	NP_997246;NP_997364	0	0	0.2243	0	0	0.2332	0	0	0.2225	0.226667	0.00572917	1	1	1.2404	0	0	0.2239	0	0	0.2279	0.564067	0.585725	2.48853
51335	NGRN	neugrin, neurite outgrowth associated	DSC92	NP_001028260	0	0	0.2243	0	0	0.2332	0	0	0.2225	0.226667	0.00572917	1	1	1.2404	0	0	0.2239	0	0	0.2279	0.564067	0.585725	2.48853
338323	NLRP14	NLR family, pyrin domain containing 14	CLR11.2|GC-LRR|NALP14|NOD5|PAN8	NP_789792	0	0	0.2243	0	0	0.2332	0	0	0.2225	0.226667	0.00572917	1	1	1.2404	0	0	0.2239	0	0	0.2279	0.564067	0.585725	2.48853
4858	NOVA2	neuro-oncological ventral antigen 2	ANOVA|NOVA3	NP_002507	0	0	0.2243	0	0	0.2332	0	0	0.2225	0.226667	0.00572917	1	1	1.2404	0	0	0.2239	0	0	0.2279	0.564067	0.585725	2.48853
283869	NPW	neuropeptide W	L8|L8C|PPL8|PPNPW	NP_001092926	0	0	0.2243	0	0	0.2332	0	0	0.2225	0.226667	0.00572917	1	1	1.2404	0	0	0.2239	0	0	0.2279	0.564067	0.585725	2.48853
729330	OC90	otoconin 90	PLA2L	NP_001073868	0	0	0.2243	0	0	0.2332	0	0	0.2225	0.226667	0.00572917	1	1	1.2404	0	0	0.2239	0	0	0.2279	0.564067	0.585725	2.48853
4957	ODF2	outer dense fiber of sperm tails 2	CT134|ODF2/1|ODF2/2|ODF84	NP_001229281;NP_001229282;NP_001229283;NP_002531;NP_702910;NP_702911;NP_702913;NP_702914;NP_702915;NP_702917;NP_702918	0	0	0.2243	0	0	0.2332	0	0	0.2225	0.226667	0.00572917	1	1	1.2404	0	0	0.2239	0	0	0.2279	0.564067	0.585725	2.48853
219429	OR4C11	olfactory receptor family 4 subfamily C member 11	OR11-136|OR4C11P	NP_001004700	0	0	0.2243	0	0	0.2332	0	0	0.2225	0.226667	0.00572917	1	1	1.2404	0	0	0.2239	0	0	0.2279	0.564067	0.585725	2.48853
5064	PALM	paralemmin	-	NP_001035224;NP_002570	0	0	0.2243	0	0	0.2332	0	0	0.2225	0.226667	0.00572917	1	1	1.2404	0	0	0.2239	0	0	0.2279	0.564067	0.585725	2.48853
5077	PAX3	paired box 3	CDHS|HUP2|WS1|WS3	NP_000429;NP_001120838;NP_039230;NP_852122;NP_852123;NP_852124;NP_852125;NP_852126	0	0	0.2243	0	0	0.2332	0	0	0.2225	0.226667	0.00572917	1	1	1.2404	0	0	0.2239	0	0	0.2279	0.564067	0.585725	2.48853
64430	PCNX4	pecanex homolog 4 (Drosophila)	C14orf135|FBP2|PCNXL4	NP_071940	0	0	0.2243	0	0	0.2332	0	0	0.2225	0.226667	0.00572917	1	1	1.2404	0	0	0.2239	0	0	0.2279	0.564067	0.585725	2.48853
26577	PCOLCE2	procollagen C-endopeptidase enhancer 2	PCPE2	NP_037495	0	0	0.2243	0	0	0.2332	0	0	0.2225	0.226667	0.00572917	1	1	1.2404	0	0	0.2239	0	0	0.2279	0.564067	0.585725	2.48853
5153	PDE1B	phosphodiesterase 1B	HEL-S-79p|PDE1B1|PDES1B	NP_000915;NP_001159447;NP_001275697;NP_001275698;NP_001302463;NP_001302464	0	0	0.2243	0	0	0.2332	0	0	0.2225	0.226667	0.00572917	1	1	1.2404	0	0	0.2239	0	0	0.2279	0.564067	0.585725	2.48853
63895	PIEZO2	piezo-type mechanosensitive ion channel component 2	C18orf30|C18orf58|DA3|DA5|FAM38B|FAM38B2|HsT748|HsT771|MWKS	NP_071351	0	0	0.2243	0	0	0.2332	0	0	0.2225	0.226667	0.00572917	1	1	1.2404	0	0	0.2239	0	0	0.2279	0.564067	0.585725	2.48853
415116	PIM3	Pim-3 proto-oncogene, serine/threonine kinase	pim-3	NP_001001852	0	0	0.2243	0	0	0.2332	0	0	0.2225	0.226667	0.00572917	1	1	1.2404	0	0	0.2239	0	0	0.2279	0.564067	0.585725	2.48853
5334	PLCL1	phospholipase C like 1	PLCE|PLCL|PLDL1|PPP1R127|PRIP	NP_006217	0	0	0.2243	0	0	0.2332	0	0	0.2225	0.226667	0.00572917	1	1	1.2404	0	0	0.2239	0	0	0.2279	0.564067	0.585725	2.48853
79983	POF1B	premature ovarian failure, 1B	POF|POF2B	NP_001294869;NP_079197	0	0	0.2243	0	0	0.2332	0	0	0.2225	0.226667	0.00572917	1	1	1.2404	0	0	0.2239	0	0	0.2279	0.564067	0.585725	2.48853
5473	PPBP	pro-platelet basic protein	B-TG1|Beta-TG|CTAP-III|CTAP3|CTAPIII|CXCL7|LA-PF4|LDGF|MDGF|NAP-2|PBP|SCYB7|TC1|TC2|TGB|TGB1|THBGB|THBGB1	NP_002695	0	0	0.2243	0	0	0.2332	0	0	0.2225	0.226667	0.00572917	1	1	1.2404	0	0	0.2239	0	0	0.2279	0.564067	0.585725	2.48853
54776	PPP1R12C	protein phosphatase 1 regulatory subunit 12C	LENG3|MBS85|p84|p85	NP_001258547;NP_060077	0	0	0.2243	0	0	0.2332	0	0	0.2225	0.226667	0.00572917	1	1	1.2404	0	0	0.2239	0	0	0.2279	0.564067	0.585725	2.48853
23082	PPRC1	peroxisome proliferator-activated receptor gamma, coactivator-related 1	PRC	NP_001275656;NP_001275657;NP_055877	0	0	0.2243	0	0	0.2332	0	0	0.2225	0.226667	0.00572917	1	1	1.2404	0	0	0.2239	0	0	0.2279	0.564067	0.585725	2.48853
63976	PRDM16	PR domain 16	CMD1LL|LVNC8|MEL1|PFM13	NP_071397;NP_955533	0	0	0.2243	0	0	0.2332	0	0	0.2225	0.226667	0.00572917	1	1	1.2404	0	0	0.2239	0	0	0.2279	0.564067	0.585725	2.48853
5593	PRKG2	protein kinase, cGMP-dependent, type II	PRKGR2|cGK2|cGKII	NP_001269409;NP_001269410;NP_001269411;NP_001269412;NP_001269414;NP_006250	0	0	0.2243	0	0	0.2332	0	0	0.2225	0.226667	0.00572917	1	1	1.2404	0	0	0.2239	0	0	0.2279	0.564067	0.585725	2.48853
80863	PRRT1	proline-rich transmembrane protein 1	C6orf31|DSPD1|IFITMD7|NG5	NP_085154	0	0	0.2243	0	0	0.2332	0	0	0.2225	0.226667	0.00572917	1	1	1.2404	0	0	0.2239	0	0	0.2279	0.564067	0.585725	2.48853
5780	PTPN9	protein tyrosine phosphatase, non-receptor type 9	MEG2|PTPMEG2	NP_002824	0	0	0.2243	0	0	0.2332	0	0	0.2225	0.226667	0.00572917	1	1	1.2404	0	0	0.2239	0	0	0.2279	0.564067	0.585725	2.48853
5789	PTPRD	protein tyrosine phosphatase, receptor type D	HPTP|HPTPD|HPTPDELTA|PTPD|RPTPDELTA	NP_001035802;NP_001164496;NP_002830;NP_569075;NP_569076;NP_569077	0	0	0.2243	0	0	0.2332	0	0	0.2225	0.226667	0.00572917	1	1	1.2404	0	0	0.2239	0	0	0.2279	0.564067	0.585725	2.48853
5792	PTPRF	protein tyrosine phosphatase, receptor type F	BNAH2|LAR	NP_002831;NP_569707	0	0	0.2243	0	0	0.2332	0	0	0.2225	0.226667	0.00572917	1	1	1.2404	0	0	0.2239	0	0	0.2279	0.564067	0.585725	2.48853
57610	RANBP10	RAN binding protein 10	-	NP_001307167;NP_001307168;NP_001307169;NP_065901	0	0	0.2243	0	0	0.2332	0	0	0.2225	0.226667	0.00572917	1	1	1.2404	0	0	0.2239	0	0	0.2279	0.564067	0.585725	2.48853
51308	REEP2	receptor accessory protein 2	C5orf19|SGC32445|SPG72	NP_001258732;NP_057690	0	0	0.2243	0	0	0.2332	0	0	0.2225	0.226667	0.00572917	1	1	1.2404	0	0	0.2239	0	0	0.2279	0.564067	0.585725	2.48853
5966	REL	v-rel avian reticuloendotheliosis viral oncogene homolog	C-Rel	NP_001278675;NP_002899	0	0	0.2243	0	0	0.2332	0	0	0.2225	0.226667	0.00572917	1	1	1.2404	0	0	0.2239	0	0	0.2279	0.564067	0.585725	2.48853
6007	RHD	Rh blood group D antigen	CD240D|DIIIc|RH|RH30|RHCED|RHDVA(TT)|RHDel|RHPII|RHXIII|Rh4|RhDCw|RhII|RhK562-II|RhPI	NP_001121163;NP_001269796;NP_001269797;NP_001269798;NP_001269799;NP_001269800;NP_001269801;NP_057208	0	0	0.2243	0	0	0.2332	0	0	0.2225	0.226667	0.00572917	1	1	1.2404	0	0	0.2239	0	0	0.2279	0.564067	0.585725	2.48853
6100	RP9	retinitis pigmentosa 9 (autosomal dominant)	PAP-1|PAP1	NP_976033	0	0	0.2243	0	0	0.2332	0	0	0.2225	0.226667	0.00572917	1	1	1.2404	0	0	0.2239	0	0	0.2279	0.564067	0.585725	2.48853
154661	RUNDC3B	RUN domain containing 3B	RPIB9|RPIP9	NP_001127877;NP_001127878;NP_612147	0	0	0.2243	0	0	0.2332	0	0	0.2225	0.226667	0.00572917	1	1	1.2404	0	0	0.2239	0	0	0.2279	0.564067	0.585725	2.48853
22937	SCAP	SREBF chaperone	-	NP_001306973;NP_036367	0	0	0.2243	0	0	0.2332	0	0	0.2225	0.226667	0.00572917	1	1	1.2404	0	0	0.2239	0	0	0.2279	0.564067	0.585725	2.48853
6328	SCN3A	sodium channel, voltage gated, type III alpha subunit	NAC3|Nav1.3	NP_001075145;NP_001075146;NP_008853	0	0	0.2243	0	0	0.2332	0	0	0.2225	0.226667	0.00572917	1	1	1.2404	0	0	0.2239	0	0	0.2279	0.564067	0.585725	2.48853
85508	SCRT2	scratch family zinc finger 2	ZNF898B	NP_149120	0	0	0.2243	0	0	0.2332	0	0	0.2225	0.226667	0.00572917	1	1	1.2404	0	0	0.2239	0	0	0.2279	0.564067	0.585725	2.48853
6318	SERPINB4	serpin peptidase inhibitor, clade B (ovalbumin), member 4	LEUPIN|PI11|SCCA-2|SCCA1|SCCA2	NP_002965;NP_778206	0	0	0.2243	0	0	0.2332	0	0	0.2225	0.226667	0.00572917	1	1	1.2404	0	0	0.2239	0	0	0.2279	0.564067	0.585725	2.48853
6445	SGCG	sarcoglycan gamma	35DAG|A4|DAGA4|DMDA|DMDA1|LGMD2C|MAM|SCARMD2|SCG3|gamma-SG	NP_000222	0	0	0.2243	0	0	0.2332	0	0	0.2225	0.226667	0.00572917	1	1	1.2404	0	0	0.2239	0	0	0.2279	0.564067	0.585725	2.48853
151246	SGOL2	shugoshin-like 2 (S. pombe)	SGO2|TRIPIN	NP_001153505;NP_001153518;NP_689737	0	0	0.2243	0	0	0.2332	0	0	0.2225	0.226667	0.00572917	1	1	1.2404	0	0	0.2239	0	0	0.2279	0.564067	0.585725	2.48853
117157	SH2D1B	SH2 domain containing 1B	EAT2	NP_444512	0	0	0.2243	0	0	0.2332	0	0	0.2225	0.226667	0.00572917	1	1	1.2404	0	0	0.2239	0	0	0.2279	0.564067	0.585725	2.48853
6452	SH3BP2	SH3-domain binding protein 2	3BP-2|3BP2|CRBM|CRPM|RES4-23	NP_001116153;NP_001139327;NP_001139328;NP_003014	0	0	0.2243	0	0	0.2332	0	0	0.2225	0.226667	0.00572917	1	1	1.2404	0	0	0.2239	0	0	0.2279	0.564067	0.585725	2.48853
134549	SHROOM1	shroom family member 1	APXL2	NP_001166171;NP_597713	0	0	0.2243	0	0	0.2332	0	0	0.2225	0.226667	0.00572917	1	1	1.2404	0	0	0.2239	0	0	0.2279	0.564067	0.585725	2.48853
357	SHROOM2	shroom family member 2	APXL|HSAPXL	NP_001307592;NP_001307593;NP_001640	0	0	0.2243	0	0	0.2332	0	0	0.2225	0.226667	0.00572917	1	1	1.2404	0	0	0.2239	0	0	0.2279	0.564067	0.585725	2.48853
26037	SIPA1L1	signal-induced proliferation-associated 1 like 1	E6TP1	NP_001271174;NP_001271175;NP_001271176;NP_056371	0	0	0.2243	0	0	0.2332	0	0	0.2225	0.226667	0.00572917	1	1	1.2404	0	0	0.2239	0	0	0.2279	0.564067	0.585725	2.48853
345274	SLC10A6	solute carrier family 10 (sodium/bile acid cotransporter), member 6	SOAT	NP_932069	0	0	0.2243	0	0	0.2332	0	0	0.2225	0.226667	0.00572917	1	1	1.2404	0	0	0.2239	0	0	0.2279	0.564067	0.585725	2.48853
57468	SLC12A5	solute carrier family 12 (potassium/chloride transporter), member 5	KCC2	NP_001128243;NP_065759	0	0	0.2243	0	0	0.2332	0	0	0.2225	0.226667	0.00572917	1	1	1.2404	0	0	0.2239	0	0	0.2279	0.564067	0.585725	2.48853
10723	SLC12A7	solute carrier family 12 (potassium/chloride transporter), member 7	KCC4	NP_006589	0	0	0.2243	0	0	0.2332	0	0	0.2225	0.226667	0.00572917	1	1	1.2404	0	0	0.2239	0	0	0.2279	0.564067	0.585725	2.48853
92014	SLC25A51	solute carrier family 25 member 51	CG7943|MCART1	NP_219480	0	0	0.2243	0	0	0.2332	0	0	0.2225	0.226667	0.00572917	1	1	1.2404	0	0	0.2239	0	0	0.2279	0.564067	0.585725	2.48853
147407	SLC25A52	solute carrier family 25 member 52	MCART2	NP_001029344	0	0	0.2243	0	0	0.2332	0	0	0.2225	0.226667	0.00572917	1	1	1.2404	0	0	0.2239	0	0	0.2279	0.564067	0.585725	2.48853
9154	SLC28A1	solute carrier family 28 (concentrative nucleoside transporter), member 1	CNT1|HCNT1	NP_001274690;NP_001274691;NP_001308650;NP_001308651;NP_004204;NP_964014	0	0	0.2243	0	0	0.2332	0	0	0.2225	0.226667	0.00572917	1	1	1.2404	0	0	0.2239	0	0	0.2279	0.564067	0.585725	2.48853
28968	SLC6A16	solute carrier family 6 member 16	NT5|NTT5	NP_054756	0	0	0.2243	0	0	0.2332	0	0	0.2225	0.226667	0.00572917	1	1	1.2404	0	0	0.2239	0	0	0.2279	0.564067	0.585725	2.48853
23137	SMC5	structural maintenance of chromosomes 5	SMC5L1	NP_055925	0	0	0.2243	0	0	0.2332	0	0	0.2225	0.226667	0.00572917	1	1	1.2404	0	0	0.2239	0	0	0.2279	0.564067	0.585725	2.48853
29907	SNX15	sorting nexin 15	HSAF001435	NP_037438;NP_680086	0	0	0.2243	0	0	0.2332	0	0	0.2225	0.226667	0.00572917	1	1	1.2404	0	0	0.2239	0	0	0.2279	0.564067	0.585725	2.48853
6655	SOS2	SOS Ras/Rho guanine nucleotide exchange factor 2	-	NP_008870	0	0	0.2243	0	0	0.2332	0	0	0.2225	0.226667	0.00572917	1	1	1.2404	0	0	0.2239	0	0	0.2279	0.564067	0.585725	2.48853
6667	SP1	Sp1 transcription factor	-	NP_001238754;NP_003100;NP_612482	0	0	0.2243	0	0	0.2332	0	0	0.2225	0.226667	0.00572917	1	1	1.2404	0	0	0.2239	0	0	0.2279	0.564067	0.585725	2.48853
80320	SP6	Sp6 transcription factor	EPFN|EPIPROFIN|KLF14	NP_001245177;NP_954871	0	0	0.2243	0	0	0.2332	0	0	0.2225	0.226667	0.00572917	1	1	1.2404	0	0	0.2239	0	0	0.2279	0.564067	0.585725	2.48853
23145	SSPO	SCO-spondin	-	NP_940857	0	0	0.2243	0	0	0.2332	0	0	0.2225	0.226667	0.00572917	1	1	1.2404	0	0	0.2239	0	0	0.2279	0.564067	0.585725	2.48853
8869	ST3GAL5	ST3 beta-galactoside alpha-2,3-sialyltransferase 5	SATI|SIAT9|SIATGM3S|ST3GalV	NP_001035902;NP_003887	0	0	0.2243	0	0	0.2332	0	0	0.2225	0.226667	0.00572917	1	1	1.2404	0	0	0.2239	0	0	0.2279	0.564067	0.585725	2.48853
6777	STAT5B	signal transducer and activator of transcription 5B	STAT5	NP_036580	0	0	0.2243	0	0	0.2332	0	0	0.2225	0.226667	0.00572917	1	1	1.2404	0	0	0.2239	0	0	0.2279	0.564067	0.585725	2.48853
23075	SWAP70	SWAP switching B-cell complex 70kDa subunit	HSPC321|SWAP-70	NP_001284643;NP_055870	0	0	0.2243	0	0	0.2332	0	0	0.2225	0.226667	0.00572917	1	1	1.2404	0	0	0.2239	0	0	0.2279	0.564067	0.585725	2.48853
6878	TAF6	TATA-box binding protein associated factor 6	MGC:8964|TAF(II)70|TAF(II)80|TAF2E|TAFII-70|TAFII-80|TAFII70|TAFII80|TAFII85	NP_001177344;NP_005632;NP_647476	0	0	0.2243	0	0	0.2332	0	0	0.2225	0.226667	0.00572917	1	1	1.2404	0	0	0.2239	0	0	0.2279	0.564067	0.585725	2.48853
6925	TCF4	transcription factor 4	E2-2|ITF-2|ITF2|PTHS|SEF-2|SEF2|SEF2-1|SEF2-1A|SEF2-1B|SEF2-1D|TCF-4|bHLHb19	NP_001077431;NP_001230155;NP_001230156;NP_001230157;NP_001230159;NP_001230160;NP_001230161;NP_001230162;NP_001230163;NP_001230164;NP_001230165;NP_001293136;NP_001293137;NP_003190	0	0	0.2243	0	0	0.2332	0	0	0.2225	0.226667	0.00572917	1	1	1.2404	0	0	0.2239	0	0	0.2279	0.564067	0.585725	2.48853
100129278	TDRD15	tudor domain containing 15	-	NP_001293066	0	0	0.2243	0	0	0.2332	0	0	0.2225	0.226667	0.00572917	1	1	1.2404	0	0	0.2239	0	0	0.2279	0.564067	0.585725	2.48853
339669	TEX33	testis expressed 33	C22orf33|EAN57|cE81G9.2	NP_001157329;NP_848647	0	0	0.2243	0	0	0.2332	0	0	0.2225	0.226667	0.00572917	1	1	1.2404	0	0	0.2239	0	0	0.2279	0.564067	0.585725	2.48853
29928	TIMM22	translocase of inner mitochondrial membrane 22 homolog (yeast)	TEX4|TIM22	NP_037469	0	0	0.2243	0	0	0.2332	0	0	0.2225	0.226667	0.00572917	1	1	1.2404	0	0	0.2239	0	0	0.2279	0.564067	0.585725	2.48853
84076	TKTL2	transketolase-like 2	-	NP_115512	0	0	0.2243	0	0	0.2332	0	0	0.2225	0.226667	0.00572917	1	1	1.2404	0	0	0.2239	0	0	0.2279	0.564067	0.585725	2.48853
124842	TMEM132E	transmembrane protein 132E	DFNB99	NP_001291367	0	0	0.2243	0	0	0.2332	0	0	0.2225	0.226667	0.00572917	1	1	1.2404	0	0	0.2239	0	0	0.2279	0.564067	0.585725	2.48853
7137	TNNI3	troponin I type 3 (cardiac)	CMD1FF|CMD2A|CMH7|RCM1|TNNC1|cTnI	NP_000354	0	0	0.2243	0	0	0.2332	0	0	0.2225	0.226667	0.00572917	1	1	1.2404	0	0	0.2239	0	0	0.2279	0.564067	0.585725	2.48853
26146	TRAF3IP1	TRAF3 interacting protein 1	IFT54|MIP-T3|MIPT3	NP_001132962;NP_056465	0	0	0.2243	0	0	0.2332	0	0	0.2225	0.226667	0.00572917	1	1	1.2404	0	0	0.2239	0	0	0.2279	0.564067	0.585725	2.48853
11219	TREX2	three prime repair exonuclease 2	-	NP_542432	0	0	0.2243	0	0	0.2332	0	0	0.2225	0.226667	0.00572917	1	1	1.2404	0	0	0.2239	0	0	0.2279	0.564067	0.585725	2.48853
10867	TSPAN9	tetraspanin 9	NET-5|NET5|PP1057	NP_001161792;NP_006666	0	0	0.2243	0	0	0.2332	0	0	0.2225	0.226667	0.00572917	1	1	1.2404	0	0	0.2239	0	0	0.2279	0.564067	0.585725	2.48853
100131187	TSTD1	thiosulfate sulfurtransferase (rhodanese)-like domain containing 1	KAT	NP_001106676;NP_001106677;NP_001106678	0	0	0.2243	0	0	0.2332	0	0	0.2225	0.226667	0.00572917	1	1	1.2404	0	0	0.2239	0	0	0.2279	0.564067	0.585725	2.48853
158248	TTC16	tetratricopeptide repeat domain 16	-	NP_001303966;NP_659402	0	0	0.2243	0	0	0.2332	0	0	0.2225	0.226667	0.00572917	1	1	1.2404	0	0	0.2239	0	0	0.2279	0.564067	0.585725	2.48853
158135	TTLL11	tubulin tyrosine ligase like11	C9orf20|bA244O19.1	NP_001132914;NP_919228	0	0	0.2243	0	0	0.2332	0	0	0.2225	0.226667	0.00572917	1	1	1.2404	0	0	0.2239	0	0	0.2279	0.564067	0.585725	2.48853
9099	USP2	ubiquitin specific peptidase 2	UBP41|USP9	NP_001230688;NP_004196;NP_741994	0	0	0.2243	0	0	0.2332	0	0	0.2225	0.226667	0.00572917	1	1	1.2404	0	0	0.2239	0	0	0.2279	0.564067	0.585725	2.48853
54904	WHSC1L1	Wolf-Hirschhorn syndrome candidate 1-like 1	NSD3|pp14328	NP_060248;NP_075447	0	0	0.2243	0	0	0.2332	0	0	0.2225	0.226667	0.00572917	1	1	1.2404	0	0	0.2239	0	0	0.2279	0.564067	0.585725	2.48853
79844	ZDHHC11	zinc finger, DHHC-type containing 11	ZNF399	NP_079062	0	0	0.2243	0	0	0.2332	0	0	0.2225	0.226667	0.00572917	1	1	1.2404	0	0	0.2239	0	0	0.2279	0.564067	0.585725	2.48853
7753	ZNF202	zinc finger protein 202	ZKSCAN10|ZSCAN42	NP_001288708;NP_001288709;NP_001288748;NP_003446	0	0	0.2243	0	0	0.2332	0	0	0.2225	0.226667	0.00572917	1	1	1.2404	0	0	0.2239	0	0	0.2279	0.564067	0.585725	2.48853
7770	ZNF227	zinc finger protein 227	-	NP_001276095;NP_001276096;NP_001276097;NP_001276098;NP_001276099;NP_001276100;NP_001276101;NP_001276102;NP_872296	0	0	0.2243	0	0	0.2332	0	0	0.2225	0.226667	0.00572917	1	1	1.2404	0	0	0.2239	0	0	0.2279	0.564067	0.585725	2.48853
6940	ZNF354A	zinc finger protein 354A	EZNF|HEL104|HKL1|KID-1|KID1|TCF17	NP_001311268;NP_005640	0	0	0.2243	0	0	0.2332	0	0	0.2225	0.226667	0.00572917	1	1	1.2404	0	0	0.2239	0	0	0.2279	0.564067	0.585725	2.48853
57473	ZNF512B	zinc finger protein 512B	GM632	NP_065764	0	0	0.2243	0	0	0.2332	0	0	0.2225	0.226667	0.00572917	1	1	1.2404	0	0	0.2239	0	0	0.2279	0.564067	0.585725	2.48853
168850	ZNF800	zinc finger protein 800	-	NP_789784	0	0	0.2243	0	0	0.2332	0	0	0.2225	0.226667	0.00572917	1	1	1.2404	0	0	0.2239	0	0	0.2279	0.564067	0.585725	2.48853
148066	ZNRF4	zinc and ring finger 4	RNF204|SPERIZIN|Ssrzf1|spzn	NP_859061	0	0	0.2243	0	0	0.2332	0	0	0.2225	0.226667	0.00572917	1	1	1.2404	0	0	0.2239	0	0	0.2279	0.564067	0.585725	2.48853
8233	ZRSR2	zinc finger (CCCH type), RNA binding motif and serine/arginine rich 2	U2AF1-RS2|U2AF1L2|U2AF1RS2|URP|ZC3H22	NP_005080	0	0	0.2243	0	0	0.2332	0	0	0.2225	0.226667	0.00572917	1	1	1.2404	0	0	0.2239	0	0	0.2279	0.564067	0.585725	2.48853
57522	SRGAP1	SLIT-ROBO Rho GTPase activating protein 1	ARHGAP13	NP_065813	1	1	0.4038	1	1	0.4197	0	0	0.2225	0.348667	0.109552	1	2	1.7917	2	2	0.5821	0	0	0.2279	0.867233	0.819965	2.48728
64780	MICAL1	microtubule associated monooxygenase, calponin and LIM domain containing 1	MICAL|MICAL-1|NICAL	NP_001152763;NP_001273542;NP_073602	0	0	0.2243	1	1	0.4197	1	1	0.4004	0.348133	0.107676	1	1	1.2404	3	3	0.7612	2	2	0.5926	0.864733	0.336081	2.48391
161436	EML5	echinoderm microtubule associated protein like 5	EMAP-2	NP_899243	0	0	0.2243	0	0	0.2332	0	0	0.2225	0.226667	0.00572917	0	0	0.6891	0	0	0.2239	3	3	0.775	0.562667	0.296508	2.48235
84894	LINGO1	leucine rich repeat and Ig domain containing 1	LERN1|LRRN6A|UNQ201	NP_001288115;NP_001288116;NP_001288118;NP_001288120;NP_001288121;NP_001288123;NP_001288124;NP_001288126;NP_001288127;NP_001288128;NP_001288129;NP_116197	0	0	0.2243	0	0	0.2332	0	0	0.2225	0.226667	0.00572917	0	0	0.6891	0	0	0.2239	3	3	0.775	0.562667	0.296508	2.48235
4036	LRP2	LDL receptor related protein 2	DBS|GP330	NP_004516	0	0	0.2243	0	0	0.2332	0	0	0.2225	0.226667	0.00572917	0	0	0.6891	0	0	0.2239	3	3	0.775	0.562667	0.296508	2.48235
375449	MAST4	microtubule associated serine/threonine kinase family member 4	-	NP_001158136;NP_001277155;NP_001277156;NP_001277157;NP_001284580;NP_055998;NP_942123	0	0	0.2243	0	0	0.2332	0	0	0.2225	0.226667	0.00572917	0	0	0.6891	0	0	0.2239	3	3	0.775	0.562667	0.296508	2.48235
94025	MUC16	mucin 16, cell surface associated	CA125	NP_078966	0	0	0.2243	0	0	0.2332	0	0	0.2225	0.226667	0.00572917	0	0	0.6891	0	0	0.2239	3	3	0.775	0.562667	0.296508	2.48235
4791	NFKB2	nuclear factor of kappa light polypeptide gene enhancer in B-cells 2 (p49/p100)	CVID10|H2TF1|LYT-10|LYT10|NF-kB2|p100|p52	NP_001070962;NP_001248332;NP_001275653;NP_001309863;NP_001309864;NP_002493	0	0	0.2243	0	0	0.2332	0	0	0.2225	0.226667	0.00572917	0	0	0.6891	0	0	0.2239	3	3	0.775	0.562667	0.296508	2.48235
5187	PER1	period circadian clock 1	PER|RIGUI|hPER	NP_002607	0	0	0.2243	0	0	0.2332	0	0	0.2225	0.226667	0.00572917	0	0	0.6891	0	0	0.2239	2	3	0.775	0.562667	0.296508	2.48235
20	ABCA2	ATP binding cassette subfamily A member 2	ABC2	NP_001597;NP_997698	0	0	0.2243	0	0	0.2332	0	0	0.2225	0.226667	0.00572917	0	0	0.6891	1	1	0.403	2	2	0.5926	0.561567	0.145553	2.4775
55811	ADCY10	adenylate cyclase 10 (soluble)	HCA2|HEL-S-7a|SAC|SACI|Sacy|hsAC	NP_001161221;NP_001284701;NP_060887	0	0	0.2243	0	0	0.2332	0	0	0.2225	0.226667	0.00572917	0	0	0.6891	1	1	0.403	2	2	0.5926	0.561567	0.145553	2.4775
285313	IGSF10	immunoglobulin superfamily member 10	CMF608	NP_001171616;NP_001171617;NP_849144	0	0	0.2243	0	0	0.2332	0	0	0.2225	0.226667	0.00572917	0	0	0.6891	1	1	0.403	2	2	0.5926	0.561567	0.145553	2.4775
29941	PKN3	protein kinase N3	UTDP4-1	NP_001304855;NP_037487	0	0	0.2243	0	0	0.2332	0	0	0.2225	0.226667	0.00572917	0	0	0.6891	1	1	0.403	2	2	0.5926	0.561567	0.145553	2.4775
6722	SRF	serum response factor	MCM1	NP_001278930;NP_003122	0	0	0.2243	0	0	0.2332	0	0	0.2225	0.226667	0.00572917	0	0	0.6891	1	1	0.403	2	2	0.5926	0.561567	0.145553	2.4775
6860	SYT4	synaptotagmin 4	HsT1192	NP_065834	0	0	0.2243	0	0	0.2332	0	0	0.2225	0.226667	0.00572917	0	0	0.6891	1	1	0.403	2	2	0.5926	0.561567	0.145553	2.4775
7272	TTK	TTK protein kinase	CT96|ESK|MPH1|MPS1|MPS1L1|PYT	NP_001160163;NP_003309	0	0	0.2243	0	0	0.2332	0	0	0.2225	0.226667	0.00572917	0	0	0.6891	1	1	0.403	2	2	0.5926	0.561567	0.145553	2.4775
55690	PACS1	phosphofurin acidic cluster sorting protein 1	MRD17	NP_060496	2	2	0.5833	1	1	0.4197	1	1	0.4004	0.4678	0.10049	0	0	0.6891	11	11	2.1945	2	2	0.5926	1.15873	0.898297	2.47698
29	ABR	active BCR-related	MDB	NP_001083;NP_001153218;NP_001243776;NP_001269078;NP_001309769;NP_001309770;NP_001309771;NP_068781	0	0	0.2243	0	0	0.2332	0	0	0.2225	0.226667	0.00572917	0	0	0.6891	2	2	0.5821	1	1	0.4103	0.5605	0.140649	2.47279
104	ADARB1	adenosine deaminase, RNA-specific, B1	ADAR2|DRABA2|DRADA2|RED1	NP_001103;NP_001153702;NP_056648;NP_056649	0	0	0.2243	0	0	0.2332	0	0	0.2225	0.226667	0.00572917	0	0	0.6891	2	2	0.5821	1	1	0.4103	0.5605	0.140649	2.47279
10659	CELF2	CUGBP, Elav-like family member 2	BRUNOL3|CUGBP2|ETR-3|ETR3|NAPOR	NP_001020247;NP_001020248;NP_001077060;NP_001313246;NP_001313247;NP_001313248;NP_001313249;NP_001313250;NP_001313252;NP_001313253;NP_001313254;NP_001313255;NP_001313256;NP_001313257;NP_001313258;NP_001313259;NP_001313260;NP_001313261;NP_001313262;NP_001313263;NP_001313264;NP_001313265;NP_001313266;NP_001313267;NP_001313268;NP_001313269;NP_001313270;NP_001313271;NP_001313272;NP_001313273;NP_001313…	0	0	0.2243	0	0	0.2332	0	0	0.2225	0.226667	0.00572917	0	0	0.6891	2	2	0.5821	1	1	0.4103	0.5605	0.140649	2.47279
54798	DCHS2	dachsous cadherin-related 2	CDH27|CDHJ|CDHR7|PCDH23|PCDHJ	NP_001136024;NP_060109	0	0	0.2243	0	0	0.2332	0	0	0.2225	0.226667	0.00572917	0	0	0.6891	2	2	0.5821	1	1	0.4103	0.5605	0.140649	2.47279
80258	EFHC2	EF-hand domain (C-terminal) containing 2	MRX74|dJ1158H2.1	NP_079460	0	0	0.2243	0	0	0.2332	0	0	0.2225	0.226667	0.00572917	0	0	0.6891	2	2	0.5821	1	1	0.4103	0.5605	0.140649	2.47279
79633	FAT4	FAT atypical cadherin 4	CDHF14|CDHR11|FAT-J|FATJ|HKLLS2|NBLA00548|VMLDS2	NP_001278214;NP_001278232;NP_078858	0	0	0.2243	0	0	0.2332	0	0	0.2225	0.226667	0.00572917	0	0	0.6891	2	2	0.5821	1	1	0.4103	0.5605	0.140649	2.47279
3050	HBZ	hemoglobin subunit zeta	HBZ-T1|HBZ1	NP_005323	0	0	0.2243	0	0	0.2332	0	0	0.2225	0.226667	0.00572917	0	0	0.6891	1	2	0.5821	1	1	0.4103	0.5605	0.140649	2.47279
4644	MYO5A	myosin VA	GS1|MYH12|MYO5|MYR12	NP_000250;NP_001135967	0	0	0.2243	0	0	0.2332	0	0	0.2225	0.226667	0.00572917	0	0	0.6891	2	2	0.5821	1	1	0.4103	0.5605	0.140649	2.47279
5163	PDK1	pyruvate dehydrogenase kinase 1	-	NP_001265478;NP_002601	0	0	0.2243	0	0	0.2332	0	0	0.2225	0.226667	0.00572917	0	0	0.6891	2	2	0.5821	1	1	0.4103	0.5605	0.140649	2.47279
51371	POMP	proteasome maturation protein	C13orf12|HSPC014|PNAS-110|UMP1	NP_057016	0	0	0.2243	0	0	0.2332	0	0	0.2225	0.226667	0.00572917	0	0	0.6891	2	2	0.5821	1	1	0.4103	0.5605	0.140649	2.47279
29942	PURG	purine-rich element binding protein G	PURG-A|PURG-B	NP_001015508;NP_001310240;NP_001310241;NP_037489	0	0	0.2243	0	0	0.2332	0	0	0.2225	0.226667	0.00572917	0	0	0.6891	2	2	0.5821	1	1	0.4103	0.5605	0.140649	2.47279
4920	ROR2	receptor tyrosine kinase-like orphan receptor 2	BDB|BDB1|NTRKR2	NP_001305133;NP_004551	0	0	0.2243	0	0	0.2332	0	0	0.2225	0.226667	0.00572917	0	0	0.6891	2	2	0.5821	1	1	0.4103	0.5605	0.140649	2.47279
10049	DNAJB6	DnaJ heat shock protein family (Hsp40) member B6	DJ4|DnaJ|HHDJ1|HSJ-2|HSJ2|LGMD1D|LGMD1E|MRJ|MSJ-1	NP_005485;NP_490647	3	4	0.9422	1	1	0.4197	2	2	0.5784	0.646767	0.267875	4	4	2.8947	5	5	1.1195	2	3	0.775	1.5964	1.13748	2.46828
54439	RBM27	RNA binding motif protein 27	ARRS1|Psc1|ZC3H18|ZC3H20	NP_061862	4	4	0.9422	1	1	0.4197	2	2	0.5784	0.646767	0.267875	4	4	2.8947	5	5	1.1195	3	3	0.775	1.5964	1.13748	2.46828
56999	ADAMTS9	ADAM metallopeptidase with thrombospondin type 1 motif 9	-	NP_001305710;NP_891550	0	0	0.2243	0	0	0.2332	0	0	0.2225	0.226667	0.00572917	0	0	0.6891	3	3	0.7612	0	0	0.2279	0.5594	0.289342	2.46794
51479	ANKFY1	ankyrin repeat and FYVE domain containing 1	ANKHZN|BTBD23|ZFYVE14	NP_001244928;NP_057460	0	0	0.2243	0	0	0.2332	0	0	0.2225	0.226667	0.00572917	0	0	0.6891	3	3	0.7612	0	0	0.2279	0.5594	0.289342	2.46794
774	CACNA1B	calcium channel, voltage-dependent, N type, alpha 1B subunit	BIII|CACNL1A5|CACNN|Cav2.2|DYT23	NP_000709;NP_001230741	0	0	0.2243	0	0	0.2332	0	0	0.2225	0.226667	0.00572917	0	0	0.6891	3	3	0.7612	0	0	0.2279	0.5594	0.289342	2.46794
1071	CETP	cholesteryl ester transfer protein, plasma	BPIFF|HDLCQ10	NP_000069;NP_001273014	0	0	0.2243	0	0	0.2332	0	0	0.2225	0.226667	0.00572917	0	0	0.6891	3	3	0.7612	0	0	0.2279	0.5594	0.289342	2.46794
1769	DNAH8	dynein, axonemal, heavy chain 8	ATPase|hdhc9	NP_001193856	0	0	0.2243	0	0	0.2332	0	0	0.2225	0.226667	0.00572917	0	0	0.6891	3	3	0.7612	0	0	0.2279	0.5594	0.289342	2.46794
8225	GTPBP6	GTP binding protein 6 (putative)	PGPL	NP_036359	0	0	0.2243	0	0	0.2332	0	0	0.2225	0.226667	0.00572917	0	0	0.6891	3	3	0.7612	0	0	0.2279	0.5594	0.289342	2.46794
57134	MAN1C1	mannosidase alpha class 1C member 1	HMIC|MAN1A3|MAN1C|pp6318	NP_001275939;NP_065112	0	0	0.2243	0	0	0.2332	0	0	0.2225	0.226667	0.00572917	0	0	0.6891	3	3	0.7612	0	0	0.2279	0.5594	0.289342	2.46794
23324	MAN2B2	mannosidase alpha class 2B member 2	-	NP_001278967;NP_056089	0	0	0.2243	0	0	0.2332	0	0	0.2225	0.226667	0.00572917	0	0	0.6891	3	3	0.7612	0	0	0.2279	0.5594	0.289342	2.46794
9053	MAP7	microtubule associated protein 7	E-MAP-115|EMAP115	NP_001185537;NP_001185538;NP_001185540;NP_001185543;NP_001185544;NP_001185545;NP_001185546;NP_001185547;NP_001185548;NP_003971	0	0	0.2243	0	0	0.2332	0	0	0.2225	0.226667	0.00572917	0	0	0.6891	3	3	0.7612	0	0	0.2279	0.5594	0.289342	2.46794
55588	MED29	mediator complex subunit 29	IXL	NP_001304699;NP_060062	0	0	0.2243	0	0	0.2332	0	0	0.2225	0.226667	0.00572917	0	0	0.6891	3	3	0.7612	0	0	0.2279	0.5594	0.289342	2.46794
5257	PHKB	phosphorylase kinase, beta	-	NP_000284;NP_001027005	0	0	0.2243	0	0	0.2332	0	0	0.2225	0.226667	0.00572917	0	0	0.6891	3	3	0.7612	0	0	0.2279	0.5594	0.289342	2.46794
27330	RPS6KA6	ribosomal protein S6 kinase, 90kDa, polypeptide 6	PP90RSK4|RSK4	NP_055311	0	0	0.2243	0	0	0.2332	0	0	0.2225	0.226667	0.00572917	0	0	0.6891	3	3	0.7612	0	0	0.2279	0.5594	0.289342	2.46794
10244	RABEPK	Rab9 effector protein with kelch motifs	RAB9P40|bA65N13.1|p40	NP_001167623;NP_001167624;NP_005824	0	0	0.2243	2	2	0.6063	0	0	0.2225	0.351033	0.221069	1	1	1.2404	3	3	0.7612	2	2	0.5926	0.864733	0.336081	2.46339
4747	NEFL	neurofilament, light polypeptide	CMT1F|CMT2E|NF-L|NF68|NFL|PPP1R110	NP_006149	1	6	1.3012	3	5	1.1661	3	8	1.6464	1.37123	0.24769	9	13	7.8609	2	4	0.9404	2	6	1.3222	3.3745	3.89002	2.46092
8189	SYMPK	symplekin	SPK|SYM	NP_004810	3	3	0.7627	3	3	0.7929	3	3	0.7564	0.770667	0.0195106	3	3	2.3432	11	11	2.1945	4	5	1.1398	1.8925	0.656084	2.45567
55833	UBAP2	ubiquitin associated protein 2	UBAP-2	NP_001269458;NP_001269459;NP_060919	4	4	0.9422	2	2	0.6063	1	1	0.4004	0.649633	0.273487	3	3	2.3432	7	7	1.4778	4	4	0.9574	1.5928	0.700021	2.45184
4646	MYO6	myosin VI	DFNA22|DFNB37	NP_001287828;NP_004990	0	0	0.2243	0	0	0.2332	3	3	0.7564	0.404633	0.304671	2	2	1.7917	2	2	0.5821	2	2	0.5926	0.9888	0.695352	2.44369
51428	DDX41	DEAD-box helicase 41	ABS	NP_001308661;NP_001308759;NP_057306	2	2	0.5833	0	0	0.2332	1	1	0.4004	0.405633	0.175109	1	1	1.2404	2	2	0.5821	5	5	1.1398	0.987433	0.354614	2.4343
4301	MLLT4	myeloid/lymphoid or mixed-lineage leukemia; translocated to, 4	AF6|MLL-AF6	NP_001035089;NP_001193937;NP_001278893	3	3	0.7627	6	6	1.3526	0	0	0.2225	0.779267	0.565232	4	5	3.4462	10	10	2.0153	0	0	0.2279	1.89647	1.61244	2.43366
8975	USP13	ubiquitin specific peptidase 13 (isopeptidase T-3)	ISOT3|IsoT-3	NP_003931	1	1	0.4038	1	1	0.4197	1	1	0.4004	0.407967	0.0103026	2	2	1.7917	1	1	0.403	3	3	0.775	0.9899	0.718859	2.42642
8566	PDXK	pyridoxal (pyridoxine, vitamin B6) kinase	C21orf124|C21orf97|HEL-S-1a|PKH|PNK|PRED79	NP_003672	2	2	0.5833	0	0	0.2332	1	1	0.4004	0.405633	0.175109	0	0	0.6891	5	5	1.1195	5	5	1.1398	0.9828	0.254554	2.42288
1939	EIF2D	eukaryotic translation initiation factor 2D	HCA56|LGTN	NP_001188407;NP_008824	0	0	0.2243	1	1	0.4197	2	2	0.5784	0.407467	0.177367	1	1	1.2404	3	3	0.7612	4	4	0.9574	0.986333	0.240907	2.42065
29082	CHMP4A	charged multivesicular body protein 4A	C14orf123|CHMP4|CHMP4B|HSPC134|SHAX2|SNF7|SNF7-1|VPS32-1|VPS32A	NP_054888	2	2	0.5833	1	1	0.4197	0	0	0.2225	0.4085	0.180661	1	1	1.2404	4	5	1.1195	2	2	0.5926	0.984167	0.344453	2.40922
10160	FARP1	FERM, ARH/RhoGEF and pleckstrin domain protein 1	CDEP|FARP1-IT1|PLEKHC2|PPP1R75	NP_001001715;NP_001273768;NP_005757	0	0	0.2243	1	1	0.4197	2	2	0.5784	0.407467	0.177367	0	0	0.6891	7	7	1.4778	3	3	0.775	0.980633	0.432696	2.40666
9564	BCAR1	breast cancer anti-estrogen resistance 1	CAS|CAS1|CASS1|CRKAS|P130Cas	NP_001164185;NP_001164186;NP_001164187;NP_001164188;NP_001164189;NP_001164190;NP_001164191;NP_001164192;NP_055382	0	0	0.2243	0	0	0.2332	1	1	0.4004	0.285967	0.099202	1	1	1.2404	0	0	0.2239	2	2	0.5926	0.685633	0.514596	2.3976
6654	SOS1	SOS Ras/Rac guanine nucleotide exchange factor 1	GF1|GGF1|GINGF|HGF|NS4	NP_005624	0	0	0.2243	0	0	0.2332	1	1	0.4004	0.285967	0.099202	1	1	1.2404	0	0	0.2239	2	2	0.5926	0.685633	0.514596	2.3976
221400	TDRD6	tudor domain containing 6	CT41.2|NY-CO-45|SPATA36|TDR2|bA446F17.4	NP_001010870;NP_001161831	1	1	0.4038	0	0	0.2332	0	0	0.2225	0.2865	0.101726	1	1	1.2404	1	1	0.403	1	1	0.4103	0.684567	0.48138	2.38941
738	VPS51	VPS51 GARP complex subunit	ANG2|ANG3|C11orf2|C11orf3|FFR	NP_037397	1	1	0.4038	0	0	0.2332	0	0	0.2225	0.2865	0.101726	1	1	1.2404	1	1	0.403	1	1	0.4103	0.684567	0.48138	2.38941
26586	CKAP2	cytoskeleton associated protein 2	LB1|TMAP|se20-10	NP_001091995;NP_001273615;NP_001273616;NP_060674	1	1	0.4038	0	0	0.2332	0	0	0.2225	0.2865	0.101726	1	1	1.2404	2	2	0.5821	0	0	0.2279	0.683467	0.513805	2.38557
55823	VPS11	VPS11, CORVET/HOPS core subunit	END1|PEP5|RNF108|hVPS11	NP_001277114;NP_068375	1	1	0.4038	0	0	0.2332	0	0	0.2225	0.2865	0.101726	0	0	0.6891	2	2	0.5821	3	3	0.775	0.682067	0.0966421	2.38069
284273	ZADH2	zinc binding alcohol dehydrogenase domain containing 2	-	NP_001293022;NP_787103	1	1	0.4038	0	0	0.2332	0	0	0.2225	0.2865	0.101726	0	0	0.6891	2	2	0.5821	3	3	0.775	0.682067	0.0966421	2.38069
2314	FLII	flightless I actin binding protein	FLI|FLIL|Fli1	NP_001243193;NP_001243194;NP_002009	5	5	1.1217	3	3	0.7929	10	10	2.0024	1.30567	0.625384	5	6	3.9978	16	16	3.0905	11	11	2.2342	3.1075	0.881923	2.38001
57496	MKL2	MKL/myocardin-like 2	MRTF-B|MRTFB|NPD001	NP_001295071;NP_054767	0	0	0.2243	0	0	0.2332	1	1	0.4004	0.285967	0.099202	0	0	0.6891	4	4	0.9404	1	1	0.4103	0.679933	0.265169	2.37767
9897	KIAA0196	KIAA0196	RTSC|SPG8	NP_055661	3	3	0.7627	0	0	0.2332	4	4	0.9344	0.643433	0.365498	2	2	1.7917	8	8	1.657	5	5	1.1398	1.5295	0.344145	2.37709
5979	RET	ret proto-oncogene	CDHF12|CDHR16|HSCR1|MEN2A|MEN2B|MTC1|PTC|RET-ELE1|RET51	NP_065681;NP_066124	1	1	0.4038	0	0	0.2332	0	0	0.2225	0.2865	0.101726	0	0	0.6891	2	3	0.7612	2	2	0.5926	0.680967	0.0845938	2.37685
3297	HSF1	heat shock transcription factor 1	HSTF1	NP_005517	0	0	0.2243	1	1	0.4197	0	0	0.2225	0.288833	0.113337	1	1	1.2404	0	0	0.2239	2	2	0.5926	0.685633	0.514596	2.3738
10802	SEC24A	SEC24 homolog A, COPII coat complex component	-	NP_001239160;NP_068817	1	1	0.4038	1	1	0.4197	2	2	0.5784	0.4673	0.0965433	2	2	1.7917	4	4	0.9404	2	2	0.5926	1.10823	0.616917	2.37157
891	CCNB1	cyclin B1	CCNB	NP_114172	0	0	0.2243	2	2	0.6063	2	2	0.5784	0.469667	0.212951	1	2	1.7917	3	3	0.7612	3	3	0.775	1.1093	0.591016	2.36189
4351	MPI	mannose phosphate isomerase	CDG1B|PMI|PMI1	NP_001276084;NP_001276085;NP_001276086;NP_002426	0	0	0.2243	1	1	0.4197	0	0	0.2225	0.288833	0.113337	0	0	0.6891	2	3	0.7612	2	2	0.5926	0.680967	0.0845938	2.35765
64601	VPS16	VPS16, CORVET/HOPS core subunit	hVPS16	NP_072097;NP_536338	0	0	0.2243	4	4	0.9795	3	3	0.7564	0.6534	0.387993	4	4	2.8947	3	3	0.7612	4	4	0.9574	1.53777	1.17923	2.35348
79598	CEP97	centrosomal protein 97kDa	2810403B08Rik|LRRIQ2	NP_001290330;NP_078824	2	2	0.5833	0	0	0.2332	0	0	0.2225	0.346333	0.205289	1	2	1.7917	0	0	0.2239	1	1	0.4103	0.808633	0.856447	2.33484
4221	MEN1	menin 1	MEAI|SCG2	NP_000235;NP_570711;NP_570712;NP_570713;NP_570714;NP_570715;NP_570716	1	1	0.4038	0	0	0.2332	1	1	0.4004	0.3458	0.0975293	1	1	1.2404	1	1	0.403	2	3	0.775	0.806133	0.419567	2.33121
4086	SMAD1	SMAD family member 1	BSP-1|BSP1|JV4-1|JV41|MADH1|MADR1	NP_001003688;NP_005891	1	1	0.4038	0	0	0.2332	1	1	0.4004	0.3458	0.0975293	1	1	1.2404	2	2	0.5821	1	2	0.5926	0.805033	0.377075	2.32803
282890	ZNF311	zinc finger protein 311	zf31	NP_001010877;NP_001305463;NP_001305464	1	1	0.4038	0	0	0.2332	1	1	0.4004	0.3458	0.0975293	1	1	1.2404	1	2	0.5821	2	2	0.5926	0.805033	0.377075	2.32803
134510	UBLCP1	ubiquitin like domain containing CTD phosphatase 1	CPUB1	NP_659486	5	6	1.3012	2	3	0.7929	2	2	0.5784	0.890833	0.371218	1	1	1.2404	9	11	2.1945	11	14	2.7815	2.07213	0.777803	2.32606
728927	ZNF736	zinc finger protein 736	-	NP_001164376;NP_001281184	1	1	0.4038	0	0	0.2332	1	1	0.4004	0.3458	0.0975293	1	1	1.2404	2	3	0.7612	1	1	0.4103	0.803967	0.416699	2.32495
57082	CASC5	cancer susceptibility candidate 5	AF15Q14|CT29|D40|KNL1|PPP1R55|Spc7|hKNL-1|hSpc105	NP_653091;NP_733468	0	0	0.2243	1	1	0.4197	1	1	0.4004	0.348133	0.107676	2	2	1.7917	1	1	0.403	0	0	0.2279	0.807533	0.856798	2.31961
3835	KIF22	kinesin family member 22	A-328A3.2|KID|KNSL4|OBP|OBP-1|OBP-2|SEMDJL2	NP_001243198;NP_001243199;NP_015556	1	1	0.4038	1	1	0.4197	0	0	0.2225	0.348667	0.109552	2	2	1.7917	1	1	0.403	0	0	0.2279	0.807533	0.856798	2.31606
4342	MOS	v-mos Moloney murine sarcoma viral oncogene homolog	MSV	NP_005363	1	1	0.4038	1	1	0.4197	0	0	0.2225	0.348667	0.109552	1	2	1.7917	1	1	0.403	0	0	0.2279	0.807533	0.856798	2.31606
490	ATP2B1	ATPase, Ca++ transporting, plasma membrane 1	PMCA1|PMCA1kb	NP_001001323;NP_001673	7	7	1.4807	4	5	1.1661	10	11	2.1805	1.6091	0.519246	7	7	4.5495	21	22	4.1659	10	12	2.4166	3.71067	1.13699	2.30605
5058	PAK1	p21 protein (Cdc42/Rac)-activated kinase 1	PAKalpha	NP_001122092;NP_002567	2	2	0.5833	3	3	0.7929	4	5	1.1124	0.829533	0.266445	4	5	3.4462	4	4	0.9404	5	6	1.3222	1.90293	1.35007	2.29398
9646	CTR9	CTR9 homolog, Paf1/RNA polymerase II complex component	SH2BP1|TSBP|p150|p150TSP	NP_055448	4	4	0.9422	0	0	0.2332	7	7	1.4684	0.881267	0.61985	3	3	2.3432	8	9	1.8361	9	9	1.8694	2.01623	0.283651	2.28788
11321	GPN1	GPN-loop GTPase 1	ATPBD1A|MBDIN|NTPBP|RPAP4|XAB1	NP_001138519;NP_001138520;NP_001138521;NP_009197	2	2	0.5833	1	1	0.4197	3	4	0.9344	0.6458	0.26298	3	4	2.8947	3	3	0.7612	2	3	0.775	1.47697	1.22781	2.28703
9904	RBM19	RNA binding motif protein 19	-	NP_001140170;NP_001140171;NP_057280	8	8	1.6602	3	3	0.7929	3	3	0.7564	1.06983	0.511598	5	6	3.9978	10	11	2.1945	5	5	1.1398	2.44403	1.44525	2.2845
3705	ITPK1	inositol-tetrakisphosphate 1-kinase	ITRPK1	NP_001136065;NP_001136066;NP_055031	0	0	0.2243	1	1	0.4197	2	2	0.5784	0.407467	0.177367	1	1	1.2404	1	1	0.403	4	5	1.1398	0.927733	0.457208	2.27683
10589	DRAP1	DR1 associated protein 1	NC2-alpha	NP_006433	2	2	0.5833	0	0	0.2332	1	1	0.4004	0.405633	0.175109	1	1	1.2404	5	5	1.1195	1	1	0.4103	0.9234	0.448451	2.27644
1819	DRG2	developmentally regulated GTP binding protein 2	-	NP_001379	6	6	1.3012	2	2	0.6063	3	3	0.7564	0.887967	0.365655	4	4	2.8947	9	9	1.8361	6	6	1.3222	2.01767	0.801819	2.27223
4952	OCRL	oculocerebrorenal syndrome of Lowe	INPP5F|LOCR|NPHL2|OCRL-1|OCRL1	NP_000267;NP_001305713;NP_001578	2	2	0.5833	1	1	0.4197	0	0	0.2225	0.4085	0.180661	1	1	1.2404	2	2	0.5821	4	4	0.9574	0.926633	0.330227	2.26838
11218	DDX20	DEAD-box helicase 20	DP103|GEMIN3	NP_009135	0	0	0.2243	2	2	0.6063	1	1	0.4004	0.410333	0.191194	1	1	1.2404	2	2	0.5821	4	4	0.9574	0.926633	0.330227	2.25825
122011	CSNK1A1L	casein kinase 1 alpha 1 like	CK1	NP_660204	2	2	0.5833	1	1	0.4197	0	0	0.2225	0.4085	0.180661	0	0	0.6891	4	5	1.1195	4	4	0.9574	0.922	0.217373	2.25704
8449	DHX16	DEAH-box helicase 16	DBP2|DDX16|PRO2014|PRP8|PRPF2|Prp2	NP_001157711;NP_003578	6	6	1.3012	3	3	0.7929	12	13	2.5365	1.54353	0.896705	7	9	5.6531	13	15	2.9113	9	9	1.8694	3.47793	1.95446	2.25323
5331	PLCB3	phospholipase C beta 3	-	NP_000923;NP_001171812;NP_001303243	8	8	1.6602	0	0	0.2332	6	6	1.2904	1.06127	0.74058	7	7	4.5495	5	5	1.1195	7	7	1.5045	2.39117	1.87906	2.25313
55697	VAC14	Vac14 homolog (S. cerevisiae)	ArPIKfyve|TAX1BP2|TRX	NP_060522	2	2	0.5833	1	1	0.4197	1	1	0.4004	0.4678	0.10049	3	3	2.3432	1	1	0.403	1	1	0.4103	1.05217	1.11807	2.24918
51608	GET4	golgi to ER traffic protein 4	C7orf20|CEE|CGI-20|TRC35	NP_057033	1	1	0.4038	1	1	0.4197	2	2	0.5784	0.4673	0.0965433	1	2	1.7917	3	3	0.7612	2	2	0.5926	1.0485	0.649127	2.24374
51300	TIMMDC1	translocase of inner mitochondrial membrane domain containing 1	C3orf1	NP_057673	2	2	0.5833	1	1	0.4197	1	1	0.4004	0.4678	0.10049	2	2	1.7917	4	4	0.9404	1	1	0.4103	1.04747	0.696896	2.23913
2730	GCLM	glutamate-cysteine ligase modifier subunit	GLCLR	NP_001295182;NP_002052	2	2	0.5833	1	1	0.4197	1	1	0.4004	0.4678	0.10049	1	1	1.2404	4	6	1.2987	2	2	0.5926	1.0439	0.391923	2.23151
81551	STMN4	stathmin 4	RB3	NP_001269982;NP_001269983;NP_001269984;NP_110422	1	2	0.5833	2	2	0.6063	0	0	0.2225	0.4707	0.215255	1	2	1.7917	3	3	0.7612	2	2	0.5926	1.0485	0.649127	2.22753
4683	NBN	nibrin	AT-V1|AT-V2|ATV|NBS|NBS1|P95	NP_001019859;NP_002476	2	2	0.5833	1	1	0.4197	2	2	0.5784	0.527133	0.0930722	3	3	2.3432	2	2	0.5821	2	2	0.5926	1.17263	1.01375	2.22455
10427	SEC24B	SEC24 homolog B, COPII coat complex component	SEC24	NP_001036199;NP_001287742;NP_001305014;NP_001305015;NP_006314	2	2	0.5833	0	0	0.2332	3	3	0.7564	0.5243	0.266543	1	1	1.2404	6	6	1.2987	4	4	0.9574	1.1655	0.182562	2.22296
201475	RAB12	RAB12, member RAS oncogene family	-	NP_001020471	1	2	0.5833	1	4	0.9795	1	4	0.9344	0.8324	0.216902	1	6	3.9978	1	4	0.9404	1	2	0.5926	1.8436	1.87368	2.2148
79719	AAGAB	alpha- and gamma-adaptin binding protein	KPPP1|PPKP1|PPKP1A|p34	NP_001258814;NP_001258815;NP_078942	0	0	0.2243	0	0	0.2332	0	0	0.2225	0.226667	0.00572917	0	0	0.6891	0	0	0.2239	2	2	0.5926	0.501867	0.245514	2.21412
140766	ADAMTS14	ADAM metallopeptidase with thrombospondin type 1 motif 14	-	NP_542453;NP_631894	0	0	0.2243	0	0	0.2332	0	0	0.2225	0.226667	0.00572917	0	0	0.6891	0	0	0.2239	2	2	0.5926	0.501867	0.245514	2.21412
181	AGRP	agouti related neuropeptide	AGRT|ART|ASIP2	NP_001129	0	0	0.2243	0	0	0.2332	0	0	0.2225	0.226667	0.00572917	0	0	0.6891	0	0	0.2239	2	2	0.5926	0.501867	0.245514	2.21412
221264	AK9	adenylate kinase 9	AK 9|AKD1|AKD2|C6orf199|C6orf224|dJ70A9.1	NP_001138600;NP_659462	0	0	0.2243	0	0	0.2332	0	0	0.2225	0.226667	0.00572917	0	0	0.6891	0	0	0.2239	2	2	0.5926	0.501867	0.245514	2.21412
407	ARR3	arrestin 3, retinal (X-arrestin)	ARRX	NP_004303	0	0	0.2243	0	0	0.2332	0	0	0.2225	0.226667	0.00572917	0	0	0.6891	0	0	0.2239	2	2	0.5926	0.501867	0.245514	2.21412
284992	CCDC150	coiled-coil domain containing 150	-	NP_001074008	0	0	0.2243	0	0	0.2332	0	0	0.2225	0.226667	0.00572917	0	0	0.6891	0	0	0.2239	2	2	0.5926	0.501867	0.245514	2.21412
23113	CUL9	cullin 9	H7AP1|PARC	NP_055904	0	0	0.2243	0	0	0.2332	0	0	0.2225	0.226667	0.00572917	0	0	0.6891	0	0	0.2239	2	2	0.5926	0.501867	0.245514	2.21412
80067	DCAF17	DDB1 and CUL4 associated factor 17	C2orf37	NP_001158293;NP_079276	0	0	0.2243	0	0	0.2332	0	0	0.2225	0.226667	0.00572917	0	0	0.6891	0	0	0.2239	2	2	0.5926	0.501867	0.245514	2.21412
1608	DGKG	diacylglycerol kinase gamma	DAGK3|DGK-GAMMA	NP_001074213;NP_001074214;NP_001337	0	0	0.2243	0	0	0.2332	0	0	0.2225	0.226667	0.00572917	0	0	0.6891	0	0	0.2239	2	2	0.5926	0.501867	0.245514	2.21412
51626	DYNC2LI1	dynein, cytoplasmic 2, light intermediate chain 1	CGI-60|D2LIC|LIC3	NP_001180393;NP_056337;NP_057092	0	0	0.2243	0	0	0.2332	0	0	0.2225	0.226667	0.00572917	0	0	0.6891	0	0	0.2239	2	2	0.5926	0.501867	0.245514	2.21412
199786	FAM129C	family with sequence similarity 129 member C	BCNP1	NP_001091994;NP_001308755;NP_001308756;NP_001308757;NP_775815	0	0	0.2243	0	0	0.2332	0	0	0.2225	0.226667	0.00572917	0	0	0.6891	0	0	0.2239	2	2	0.5926	0.501867	0.245514	2.21412
145483	FAM161B	family with sequence similarity 161 member B	C14orf44|c14_5547	NP_689658	0	0	0.2243	0	0	0.2332	0	0	0.2225	0.226667	0.00572917	0	0	0.6891	0	0	0.2239	1	2	0.5926	0.501867	0.245514	2.21412
54942	FAM206A	family with sequence similarity 206 member A	C9orf6|CG-8|Simiate	NP_060302	0	0	0.2243	0	0	0.2332	0	0	0.2225	0.226667	0.00572917	0	0	0.6891	0	0	0.2239	1	2	0.5926	0.501867	0.245514	2.21412
157638	FAM84B	family with sequence similarity 84 member B	BCMP101|NSE2	NP_777571	0	0	0.2243	0	0	0.2332	0	0	0.2225	0.226667	0.00572917	0	0	0.6891	0	0	0.2239	2	2	0.5926	0.501867	0.245514	2.21412
84261	FBXW9	F-box and WD repeat domain containing 9	Fbw9	NP_115677	0	0	0.2243	0	0	0.2332	0	0	0.2225	0.226667	0.00572917	0	0	0.6891	0	0	0.2239	2	2	0.5926	0.501867	0.245514	2.21412
50614	GALNT9	polypeptide N-acetylgalactosaminyltransferase 9	GALNAC-T9|GALNACT9	NP_001116108;NP_068580	0	0	0.2243	0	0	0.2332	0	0	0.2225	0.226667	0.00572917	0	0	0.6891	0	0	0.2239	2	2	0.5926	0.501867	0.245514	2.21412
64599	GIGYF1	GRB10 interacting GYF protein 1	GYF1|PERQ1	NP_072096	0	0	0.2243	0	0	0.2332	0	0	0.2225	0.226667	0.00572917	0	0	0.6891	0	0	0.2239	2	2	0.5926	0.501867	0.245514	2.21412
2990	GUSB	glucuronidase, beta	BG|MPS7	NP_000172;NP_001280033;NP_001280034;NP_001271219	0	0	0.2243	0	0	0.2332	0	0	0.2225	0.226667	0.00572917	0	0	0.6891	0	0	0.2239	2	2	0.5926	0.501867	0.245514	2.21412
729920	ISPD	isoprenoid synthase domain containing	MDDGA7|MDDGC7|Nip|hCG_1745121	NP_001094887;NP_001094896	0	0	0.2243	0	0	0.2332	0	0	0.2225	0.226667	0.00572917	0	0	0.6891	0	0	0.2239	2	2	0.5926	0.501867	0.245514	2.21412
90990	KIFC2	kinesin family member C2	-	NP_665697	0	0	0.2243	0	0	0.2332	0	0	0.2225	0.226667	0.00572917	0	0	0.6891	0	0	0.2239	1	2	0.5926	0.501867	0.245514	2.21412
55220	KLHDC8A	kelch domain containing 8A	-	NP_001258792;NP_001258793;NP_001258794;NP_060673	0	0	0.2243	0	0	0.2332	0	0	0.2225	0.226667	0.00572917	0	0	0.6891	0	0	0.2239	2	2	0.5926	0.501867	0.245514	2.21412
8549	LGR5	leucine-rich repeat containing G protein-coupled receptor 5	FEX|GPR49|GPR67|GRP49|HG38	NP_001264155;NP_001264156;NP_003658	0	0	0.2243	0	0	0.2332	0	0	0.2225	0.226667	0.00572917	0	0	0.6891	0	0	0.2239	2	2	0.5926	0.501867	0.245514	2.21412
100505478	LOC100505478	uncharacterized LOC100505478	-	NP_001186162	0	0	0.2243	0	0	0.2332	0	0	0.2225	0.226667	0.00572917	0	0	0.6891	0	0	0.2239	2	2	0.5926	0.501867	0.245514	2.21412
23639	LRRC6	leucine rich repeat containing 6	CILD19|LRTP|TSLRP	NP_001308890;NP_001308891;NP_001308892;NP_001308893;NP_001308894;NP_001308895;NP_036604	0	0	0.2243	0	0	0.2332	0	0	0.2225	0.226667	0.00572917	0	0	0.6891	0	0	0.2239	2	2	0.5926	0.501867	0.245514	2.21412
9794	MAML1	mastermind like transcriptional coactivator 1	Mam-1|Mam1	NP_055572	0	0	0.2243	0	0	0.2332	0	0	0.2225	0.226667	0.00572917	0	0	0.6891	0	0	0.2239	2	2	0.5926	0.501867	0.245514	2.21412
9650	MTFR1	mitochondrial fission regulator 1	CHPPR|FAM54A2	NP_001139310;NP_001139311;NP_055452	0	0	0.2243	0	0	0.2332	0	0	0.2225	0.226667	0.00572917	0	0	0.6891	0	0	0.2239	2	2	0.5926	0.501867	0.245514	2.21412
10397	NDRG1	N-myc downstream regulated 1	CAP43|CMT4D|DRG-1|DRG1|GC4|HMSNL|NDR1|NMSL|PROXY1|RIT42|RTP|TARG1|TDD5	NP_001128714;NP_001245361;NP_001245362;NP_006087	0	0	0.2243	0	0	0.2332	0	0	0.2225	0.226667	0.00572917	0	0	0.6891	0	0	0.2239	2	2	0.5926	0.501867	0.245514	2.21412
348938	NIPAL4	NIPA like domain containing 4	ARCI6|ICHTHYIN|ICHYN	NP_001092757;NP_001165763	0	0	0.2243	0	0	0.2332	0	0	0.2225	0.226667	0.00572917	0	0	0.6891	0	0	0.2239	2	2	0.5926	0.501867	0.245514	2.21412
4907	NT5E	5'-nucleotidase ecto	CALJA|CD73|E5NT|NT|NT5|NTE|eN|eNT	NP_001191742;NP_002517	0	0	0.2243	0	0	0.2332	0	0	0.2225	0.226667	0.00572917	0	0	0.6891	0	0	0.2239	2	2	0.5926	0.501867	0.245514	2.21412
90102	PHLDB2	pleckstrin homology-like domain, family B, member 2	LL5b|LL5beta	NP_001127909;NP_001127910;NP_001127911;NP_665696	0	0	0.2243	0	0	0.2332	0	0	0.2225	0.226667	0.00572917	0	0	0.6891	0	0	0.2239	2	2	0.5926	0.501867	0.245514	2.21412
647286	RD3L	retinal degeneration 3-like	TDRD9-AS1|TDRD9AS1	NP_001244197	0	0	0.2243	0	0	0.2332	0	0	0.2225	0.226667	0.00572917	0	0	0.6891	0	0	0.2239	1	2	0.5926	0.501867	0.245514	2.21412
83852	SETDB2	SET domain, bifurcated 2	C13orf4|CLLD8|CLLL8|KMT1F	NP_001153780;NP_001307628;NP_114121	0	0	0.2243	0	0	0.2332	0	0	0.2225	0.226667	0.00572917	0	0	0.6891	0	0	0.2239	2	2	0.5926	0.501867	0.245514	2.21412
116843	SLC18B1	solute carrier family 18, subfamily B, member 1	C6orf192|dJ55C23.6	NP_439896	0	0	0.2243	0	0	0.2332	0	0	0.2225	0.226667	0.00572917	0	0	0.6891	0	0	0.2239	2	2	0.5926	0.501867	0.245514	2.21412
144195	SLC2A14	solute carrier family 2 (facilitated glucose transporter), member 14	GLUT14|SLC2A3P3	NP_001273162;NP_001273163;NP_001273164;NP_001273165;NP_001273166;NP_703150	0	0	0.2243	0	0	0.2332	0	0	0.2225	0.226667	0.00572917	0	0	0.6891	0	0	0.2239	2	2	0.5926	0.501867	0.245514	2.21412
54498	SMOX	spermine oxidase	C20orf16|PAO|PAO-1|PAO1|PAOH|PAOH1|SMO	NP_001257620;NP_787033;NP_787034;NP_787035;NP_787036	0	0	0.2243	0	0	0.2332	0	0	0.2225	0.226667	0.00572917	0	0	0.6891	0	0	0.2239	1	2	0.5926	0.501867	0.245514	2.21412
6645	SNTB2	syntrophin beta 2	D16S2531E|EST25263|SNT2B2|SNT3|SNTL	NP_006741	0	0	0.2243	0	0	0.2332	0	0	0.2225	0.226667	0.00572917	0	0	0.6891	0	0	0.2239	2	2	0.5926	0.501867	0.245514	2.21412
11037	STON1	stonin 1	SALF|SBLF|STN1|STNB1	NP_001185524;NP_006864	0	0	0.2243	0	0	0.2332	0	0	0.2225	0.226667	0.00572917	0	0	0.6891	0	0	0.2239	2	2	0.5926	0.501867	0.245514	2.21412
286749	STON1-GTF2A1L	STON1-GTF2A1L readthrough	SALF	NP_001185522;NP_001185523;NP_758515	0	0	0.2243	0	0	0.2332	0	0	0.2225	0.226667	0.00572917	0	0	0.6891	0	0	0.2239	2	2	0.5926	0.501867	0.245514	2.21412
6882	TAF11	TATA-box binding protein associated factor 11	MGC:15243|PRO2134|TAF2I|TAFII28	NP_001257417;NP_005634	0	0	0.2243	0	0	0.2332	0	0	0.2225	0.226667	0.00572917	0	0	0.6891	0	0	0.2239	2	2	0.5926	0.501867	0.245514	2.21412
84899	TMTC4	transmembrane and tetratricopeptide repeat containing 4	-	NP_001073137;NP_001273382;NP_116202	0	0	0.2243	0	0	0.2332	0	0	0.2225	0.226667	0.00572917	0	0	0.6891	0	0	0.2239	2	2	0.5926	0.501867	0.245514	2.21412
9819	TSC22D2	TSC22 domain family member 2	TILZ4a|TILZ4b|TILZ4c	NP_001290193;NP_055594	0	0	0.2243	0	0	0.2332	0	0	0.2225	0.226667	0.00572917	0	0	0.6891	0	0	0.2239	2	2	0.5926	0.501867	0.245514	2.21412
151790	WDR49	WD repeat domain 49	-	NP_849146	0	0	0.2243	0	0	0.2332	0	0	0.2225	0.226667	0.00572917	0	0	0.6891	0	0	0.2239	2	2	0.5926	0.501867	0.245514	2.21412
79968	WDR76	WD repeat domain 76	CDW14	NP_001161413;NP_079184	0	0	0.2243	0	0	0.2332	0	0	0.2225	0.226667	0.00572917	0	0	0.6891	0	0	0.2239	2	2	0.5926	0.501867	0.245514	2.21412
55249	YY1AP1	YY1 associated protein 1	HCCA1|HCCA2|YAP|YY1AP	NP_620830;NP_001185828;NP_001185829;NP_001185830;NP_001185831;NP_001185832;NP_001185833;NP_001185834;NP_001185835;NP_060723;NP_620829;NP_620832	0	0	0.2243	0	0	0.2332	0	0	0.2225	0.226667	0.00572917	0	0	0.6891	0	0	0.2239	2	2	0.5926	0.501867	0.245514	2.21412
10520	ZNF211	zinc finger protein 211	C2H2-25|CH2H2-25|ZNF-25|ZNFC25	NP_001252526;NP_001252527;NP_001252528;NP_001252529;NP_001309235;NP_006376;NP_942152	0	0	0.2243	0	0	0.2332	0	0	0.2225	0.226667	0.00572917	0	0	0.6891	0	0	0.2239	2	2	0.5926	0.501867	0.245514	2.21412
84146	ZNF644	zinc finger protein 644	BM-005|MYP21|NatF|ZEP-2	NP_057704;NP_115562;NP_958357	0	0	0.2243	0	0	0.2332	0	0	0.2225	0.226667	0.00572917	0	0	0.6891	0	0	0.2239	2	2	0.5926	0.501867	0.245514	2.21412
374655	ZNF710	zinc finger protein 710	-	NP_940928	0	0	0.2243	0	0	0.2332	0	0	0.2225	0.226667	0.00572917	0	0	0.6891	0	0	0.2239	2	2	0.5926	0.501867	0.245514	2.21412
11222	MRPL3	mitochondrial ribosomal protein L3	COXPD9|MRL3|RPML3	NP_009139	3	3	0.7627	2	2	0.6063	5	5	1.1124	0.827133	0.259129	1	1	1.2404	9	11	2.1945	7	10	2.0518	1.8289	0.514626	2.21113
55	ACPP	acid phosphatase, prostate	5'-NT|ACP-3|ACP3	NP_001090;NP_001127666;NP_001278966	0	0	0.2243	0	0	0.2332	0	0	0.2225	0.226667	0.00572917	0	0	0.6891	1	1	0.403	1	1	0.4103	0.5008	0.163113	2.20941
64431	ACTR6	ARP6 actin-related protein 6 homolog (yeast)	ARP6|CDA12|HSPC281|MSTP136|hARP6|hARPX	NP_071941	0	0	0.2243	0	0	0.2332	0	0	0.2225	0.226667	0.00572917	0	0	0.6891	1	1	0.403	1	1	0.4103	0.5008	0.163113	2.20941
80070	ADAMTS20	ADAM metallopeptidase with thrombospondin type 1 motif 20	ADAM-TS20|ADAMTS-20|GON-1	NP_079279	0	0	0.2243	0	0	0.2332	0	0	0.2225	0.226667	0.00572917	0	0	0.6891	1	1	0.403	1	1	0.4103	0.5008	0.163113	2.20941
113179	ADAT3	adenosine deaminase, tRNA-specific 3	FWP005|MRT36|MST121|MSTP121|S863-5|TAD3	NP_612431	0	0	0.2243	0	0	0.2332	0	0	0.2225	0.226667	0.00572917	0	0	0.6891	1	1	0.403	1	1	0.4103	0.5008	0.163113	2.20941
116988	AGAP3	ArfGAP with GTPase domain, ankyrin repeat and PH domain 3	AGAP-3|CENTG3|CRAG|MRIP-1|cnt-g3	NP_001036000;NP_001268229;NP_001295233;NP_001295234;NP_114152	0	0	0.2243	0	0	0.2332	0	0	0.2225	0.226667	0.00572917	0	0	0.6891	1	1	0.403	1	1	0.4103	0.5008	0.163113	2.20941
130872	AHSA2	AHA1, activator of heat shock 90kDa protein ATPase homolog 2 (yeast)	Hch1	NP_001308229;NP_001308230;NP_001308231;NP_001308232;NP_001308233;NP_001308234;NP_689605	0	0	0.2243	0	0	0.2332	0	0	0.2225	0.226667	0.00572917	0	0	0.6891	1	1	0.403	1	1	0.4103	0.5008	0.163113	2.20941
216	ALDH1A1	aldehyde dehydrogenase 1 family member A1	ALDC|ALDH-E1|ALDH1|ALDH11|HEL-9|HEL-S-53e|HEL12|PUMB1|RALDH1	NP_000680	0	0	0.2243	0	0	0.2332	0	0	0.2225	0.226667	0.00572917	0	0	0.6891	1	1	0.403	1	1	0.4103	0.5008	0.163113	2.20941
379	ARL4D	ADP ribosylation factor like GTPase 4D	ARF4L|ARL6	NP_001652	0	0	0.2243	0	0	0.2332	0	0	0.2225	0.226667	0.00572917	0	0	0.6891	1	1	0.403	1	1	0.4103	0.5008	0.163113	2.20941
245972	ATP6V0D2	ATPase, H+ transporting, lysosomal 38kDa, V0 subunit d2	ATP6D2|VMA6	NP_689778	0	0	0.2243	0	0	0.2332	0	0	0.2225	0.226667	0.00572917	0	0	0.6891	1	1	0.403	1	1	0.4103	0.5008	0.163113	2.20941
54785	BORCS6	BLOC-1 related complex subunit 6	C17orf59|PRO2472	NP_060092	0	0	0.2243	0	0	0.2332	0	0	0.2225	0.226667	0.00572917	0	0	0.6891	1	1	0.403	1	1	0.4103	0.5008	0.163113	2.20941
714	C1QC	complement component 1, q subcomponent, C chain	C1Q-C|C1QG	NP_001107573;NP_758957	0	0	0.2243	0	0	0.2332	0	0	0.2225	0.226667	0.00572917	0	0	0.6891	1	1	0.403	1	1	0.4103	0.5008	0.163113	2.20941
10882	C1QL1	complement component 1, q subcomponent-like 1	C1QRF|C1QTNF14|CRF	NP_006679	0	0	0.2243	0	0	0.2332	0	0	0.2225	0.226667	0.00572917	0	0	0.6891	1	1	0.403	1	1	0.4103	0.5008	0.163113	2.20941
152206	CCDC13	coiled-coil domain containing 13	-	NP_653320	0	0	0.2243	0	0	0.2332	0	0	0.2225	0.226667	0.00572917	0	0	0.6891	1	1	0.403	1	1	0.4103	0.5008	0.163113	2.20941
81620	CDT1	chromatin licensing and DNA replication factor 1	DUP|RIS2	NP_112190	0	0	0.2243	0	0	0.2332	0	0	0.2225	0.226667	0.00572917	0	0	0.6891	1	1	0.403	1	1	0.4103	0.5008	0.163113	2.20941
1438	CSF2RA	colony stimulating factor 2 receptor alpha subunit	CD116|CDw116|CSF2R|CSF2RAX|CSF2RAY|CSF2RX|CSF2RY|GM-CSF-R-alpha|GMCSFR|GMR|SMDP4	NP_001155001;NP_001155002;NP_001155003;NP_001155004;NP_006131;NP_758448;NP_758449;NP_758450;NP_758452	0	0	0.2243	0	0	0.2332	0	0	0.2225	0.226667	0.00572917	0	0	0.6891	1	1	0.403	1	1	0.4103	0.5008	0.163113	2.20941
51167	CYB5R4	cytochrome b5 reductase 4	NCB5OR|cb5/cb5R|dJ676J13.1	NP_057314	0	0	0.2243	0	0	0.2332	0	0	0.2225	0.226667	0.00572917	0	0	0.6891	1	1	0.403	1	1	0.4103	0.5008	0.163113	2.20941
89978	DPH6	diphthamine biosynthesis 6	ATPBD4	NP_001135444;NP_542381	0	0	0.2243	0	0	0.2332	0	0	0.2225	0.226667	0.00572917	0	0	0.6891	1	1	0.403	1	1	0.4103	0.5008	0.163113	2.20941
151651	EFHB	EF-hand domain family member B	CFAP21	NP_653316	0	0	0.2243	0	0	0.2332	0	0	0.2225	0.226667	0.00572917	0	0	0.6891	1	1	0.403	1	1	0.4103	0.5008	0.163113	2.20941
284131	ENDOV	endonuclease V	-	NP_001158109;NP_001158110;NP_775898	0	0	0.2243	0	0	0.2332	0	0	0.2225	0.226667	0.00572917	0	0	0.6891	1	1	0.403	1	1	0.4103	0.5008	0.163113	2.20941
158584	FAAH2	fatty acid amide hydrolase 2	AMDD	NP_777572	0	0	0.2243	0	0	0.2332	0	0	0.2225	0.226667	0.00572917	0	0	0.6891	1	1	0.403	1	1	0.4103	0.5008	0.163113	2.20941
64760	FAM160B2	family with sequence similarity 160 member B2	RAI16	NP_073586	0	0	0.2243	0	0	0.2332	0	0	0.2225	0.226667	0.00572917	0	0	0.6891	1	1	0.403	1	1	0.4103	0.5008	0.163113	2.20941
84070	FAM186B	family with sequence similarity 186 member B	C12orf25	NP_115506	0	0	0.2243	0	0	0.2332	0	0	0.2225	0.226667	0.00572917	0	0	0.6891	1	1	0.403	1	1	0.4103	0.5008	0.163113	2.20941
115572	FAM46B	family with sequence similarity 46 member B	-	NP_443175	0	0	0.2243	0	0	0.2332	0	0	0.2225	0.226667	0.00572917	0	0	0.6891	1	1	0.403	1	1	0.4103	0.5008	0.163113	2.20941
23163	GGA3	golgi-associated, gamma adaptin ear containing, ARF binding protein 3	-	NP_001166174;NP_001166175;NP_001278570;NP_001278571;NP_054720;NP_619525	0	0	0.2243	0	0	0.2332	0	0	0.2225	0.226667	0.00572917	0	0	0.6891	1	1	0.403	1	1	0.4103	0.5008	0.163113	2.20941
10052	GJC1	gap junction protein gamma 1	CX45|GJA7	NP_001073852;NP_005488	0	0	0.2243	0	0	0.2332	0	0	0.2225	0.226667	0.00572917	0	0	0.6891	1	1	0.403	1	1	0.4103	0.5008	0.163113	2.20941
11146	GLMN	glomulin, FKBP associated protein	FAP|FAP48|FAP68|FKBPAP|GLML|GVM|VMGLOM	NP_001306612;NP_444504	0	0	0.2243	0	0	0.2332	0	0	0.2225	0.226667	0.00572917	0	0	0.6891	1	1	0.403	1	1	0.4103	0.5008	0.163113	2.20941
9215	LARGE	like-glycosyltransferase	MDC1D|MDDGA6|MDDGB6	NP_004728;NP_598397	0	0	0.2243	0	0	0.2332	0	0	0.2225	0.226667	0.00572917	0	0	0.6891	1	1	0.403	1	1	0.4103	0.5008	0.163113	2.20941
29995	LMCD1	LIM and cysteine-rich domains 1	-	NP_001265162;NP_001265163;NP_001265164;NP_055398	0	0	0.2243	0	0	0.2332	0	0	0.2225	0.226667	0.00572917	0	0	0.6891	1	1	0.403	1	1	0.4103	0.5008	0.163113	2.20941
84125	LRRIQ1	leucine-rich repeats and IQ motif containing 1	-	NP_001073379	0	0	0.2243	0	0	0.2332	0	0	0.2225	0.226667	0.00572917	0	0	0.6891	1	1	0.403	1	1	0.4103	0.5008	0.163113	2.20941
9500	MAGED1	MAGE family member D1	DLXIN-1|NRAGE	NP_001005332;NP_001005333;NP_008917	0	0	0.2243	0	0	0.2332	0	0	0.2225	0.226667	0.00572917	0	0	0.6891	1	1	0.403	1	1	0.4103	0.5008	0.163113	2.20941
441024	MTHFD2L	methylenetetrahydrofolate dehydrogenase (NADP+ dependent) 2-like	-	NP_001138450	0	0	0.2243	0	0	0.2332	0	0	0.2225	0.226667	0.00572917	0	0	0.6891	1	1	0.403	1	1	0.4103	0.5008	0.163113	2.20941
79133	NDUFAF5	NADH:ubiquinone oxidoreductase complex assembly factor 5	C20orf7|bA526K24.2|dJ842G6.1	NP_001034464;NP_077025	0	0	0.2243	0	0	0.2332	0	0	0.2225	0.226667	0.00572917	0	0	0.6891	1	1	0.403	1	1	0.4103	0.5008	0.163113	2.20941
114548	NLRP3	NLR family, pyrin domain containing 3	AGTAVPRL|AII|AVP|C1orf7|CIAS1|CLR1.1|FCAS|FCAS1|FCU|MWS|NALP3|PYPAF1	NP_001073289;NP_001120933;NP_001120934;NP_001230062;NP_004886;NP_899632	0	0	0.2243	0	0	0.2332	0	0	0.2225	0.226667	0.00572917	0	0	0.6891	1	1	0.403	1	1	0.4103	0.5008	0.163113	2.20941
8829	NRP1	neuropilin 1	BDCA4|CD304|NP1|NRP|VEGF165R	NP_001019799;NP_001019800;NP_001231901;NP_001231902;NP_003864	0	0	0.2243	0	0	0.2332	0	0	0.2225	0.226667	0.00572917	0	0	0.6891	1	1	0.403	1	1	0.4103	0.5008	0.163113	2.20941
5193	PEX12	peroxisomal biogenesis factor 12	PAF-3|PBD3A	NP_000277	0	0	0.2243	0	0	0.2332	0	0	0.2225	0.226667	0.00572917	0	0	0.6891	1	1	0.403	1	1	0.4103	0.5008	0.163113	2.20941
94005	PIGS	phosphatidylinositol glycan anchor biosynthesis class S	-	NP_149975	0	0	0.2243	0	0	0.2332	0	0	0.2225	0.226667	0.00572917	0	0	0.6891	1	1	0.403	1	1	0.4103	0.5008	0.163113	2.20941
51177	PLEKHO1	pleckstrin homology domain containing O1	CKIP-1|CKIP1|JBP|OC120	NP_001291651;NP_001291652;NP_001291653;NP_057358	0	0	0.2243	0	0	0.2332	0	0	0.2225	0.226667	0.00572917	0	0	0.6891	1	1	0.403	1	1	0.4103	0.5008	0.163113	2.20941
53632	PRKAG3	protein kinase, AMP-activated, gamma 3 non-catalytic subunit	AMPKG3	NP_059127	0	0	0.2243	0	0	0.2332	0	0	0.2225	0.226667	0.00572917	0	0	0.6891	1	1	0.403	1	1	0.4103	0.5008	0.163113	2.20941
56984	PSMG2	proteasome (prosome, macropain) assembly chaperone 2	CLAST3|HCCA3|HsT1707|MDS003|PAC2|TNFSF5IP1	NP_064617;NP_671692	0	0	0.2243	0	0	0.2332	0	0	0.2225	0.226667	0.00572917	0	0	0.6891	1	1	0.403	1	1	0.4103	0.5008	0.163113	2.20941
22864	R3HDM2	R3H domain containing 2	CAG6|PR01365	NP_055740	0	0	0.2243	0	0	0.2332	0	0	0.2225	0.226667	0.00572917	0	0	0.6891	1	1	0.403	1	1	0.4103	0.5008	0.163113	2.20941
6000	RGS7	regulator of G-protein signaling 7	-	NP_001269702;NP_001269704;NP_001269707;NP_002915	0	0	0.2243	0	0	0.2332	0	0	0.2225	0.226667	0.00572917	0	0	0.6891	1	1	0.403	1	1	0.4103	0.5008	0.163113	2.20941
79048	SECISBP2	SECIS binding protein 2	SBP2	NP_001269617;NP_001269618;NP_001269619;NP_076982	0	0	0.2243	0	0	0.2332	0	0	0.2225	0.226667	0.00572917	0	0	0.6891	1	1	0.403	1	1	0.4103	0.5008	0.163113	2.20941
9517	SPTLC2	serine palmitoyltransferase long chain base subunit 2	HSN1C|LCB2|LCB2A|NSAN1C|SPT2|hLCB2a	NP_004854	0	0	0.2243	0	0	0.2332	0	0	0.2225	0.226667	0.00572917	0	0	0.6891	1	1	0.403	1	1	0.4103	0.5008	0.163113	2.20941
6773	STAT2	signal transducer and activator of transcription 2	ISGF-3|P113|STAT113	NP_005410;NP_938146	0	0	0.2243	0	0	0.2332	0	0	0.2225	0.226667	0.00572917	0	0	0.6891	1	1	0.403	1	1	0.4103	0.5008	0.163113	2.20941
114790	STK11IP	serine/threonine kinase 11 interacting protein	LIP1|LKB1IP|STK11IP1	NP_443134	0	0	0.2243	0	0	0.2332	0	0	0.2225	0.226667	0.00572917	0	0	0.6891	1	1	0.403	1	1	0.4103	0.5008	0.163113	2.20941
23208	SYT11	synaptotagmin 11	SYT12|sytXI	NP_689493	0	0	0.2243	0	0	0.2332	0	0	0.2225	0.226667	0.00572917	0	0	0.6891	1	1	0.403	1	1	0.4103	0.5008	0.163113	2.20941
51592	TRIM33	tripartite motif containing 33	ECTO|PTC7|RFG7|TF1G|TIF1G|TIF1GAMMA|TIFGAMMA	NP_056990;NP_148980	0	0	0.2243	0	0	0.2332	0	0	0.2225	0.226667	0.00572917	0	0	0.6891	1	1	0.403	1	1	0.4103	0.5008	0.163113	2.20941
56302	TRPV5	transient receptor potential cation channel, subfamily V, member 5	CAT2|ECAC1|OTRPC3	NP_062815	0	0	0.2243	0	0	0.2332	0	0	0.2225	0.226667	0.00572917	0	0	0.6891	1	1	0.403	1	1	0.4103	0.5008	0.163113	2.20941
92912	UBE2Q2	ubiquitin conjugating enzyme E2Q family member 2	-	NP_001138807;NP_001271311;NP_775740	0	0	0.2243	0	0	0.2332	0	0	0.2225	0.226667	0.00572917	0	0	0.6891	1	1	0.403	1	1	0.4103	0.5008	0.163113	2.20941
7398	USP1	ubiquitin specific peptidase 1	UBP	NP_001017415;NP_001017416;NP_003359	0	0	0.2243	0	0	0.2332	0	0	0.2225	0.226667	0.00572917	0	0	0.6891	1	1	0.403	1	1	0.4103	0.5008	0.163113	2.20941
7508	XPC	xeroderma pigmentosum, complementation group C	RAD4|XP3|XPCC|p125	NP_004619	0	0	0.2243	0	0	0.2332	0	0	0.2225	0.226667	0.00572917	0	0	0.6891	1	1	0.403	1	1	0.4103	0.5008	0.163113	2.20941
7571	ZNF23	zinc finger protein 23	KOX16|ZNF359|ZNF612|Zfp612	NP_001291421;NP_001291422;NP_001291423;NP_666016	0	0	0.2243	0	0	0.2332	0	0	0.2225	0.226667	0.00572917	0	0	0.6891	1	1	0.403	1	1	0.4103	0.5008	0.163113	2.20941
8427	ZNF282	zinc finger protein 282	HUB1	NP_001290410;NP_003566	0	0	0.2243	0	0	0.2332	0	0	0.2225	0.226667	0.00572917	0	0	0.6891	1	1	0.403	1	1	0.4103	0.5008	0.163113	2.20941
85460	ZNF518B	zinc finger protein 518B	-	NP_444270	0	0	0.2243	0	0	0.2332	0	0	0.2225	0.226667	0.00572917	0	0	0.6891	1	1	0.403	1	1	0.4103	0.5008	0.163113	2.20941
10347	ABCA7	ATP binding cassette subfamily A member 7	ABCA-SSN|ABCX	NP_061985	0	0	0.2243	0	0	0.2332	0	0	0.2225	0.226667	0.00572917	0	0	0.6891	2	2	0.5821	0	0	0.2279	0.4997	0.241389	2.20456
8227	AKAP17A	A-kinase anchoring protein 17A	721P|AKAP-17A|CCDC133|CXYorf3|DXYS155E|PRKA17A|SFRS17A|XE7|XE7Y	NP_005079	0	0	0.2243	0	0	0.2332	0	0	0.2225	0.226667	0.00572917	0	0	0.6891	2	2	0.5821	0	0	0.2279	0.4997	0.241389	2.20456
242	ALOX12B	arachidonate 12-lipoxygenase, 12R type	12R-LOX|ARCI2	NP_001130	0	0	0.2243	0	0	0.2332	0	0	0.2225	0.226667	0.00572917	0	0	0.6891	1	2	0.5821	0	0	0.2279	0.4997	0.241389	2.20456
84168	ANTXR1	anthrax toxin receptor 1	ATR|GAPO|TEM8	NP_060623;NP_115584;NP_444262	0	0	0.2243	0	0	0.2332	0	0	0.2225	0.226667	0.00572917	0	0	0.6891	2	2	0.5821	0	0	0.2279	0.4997	0.241389	2.20456
23545	ATP6V0A2	ATPase, H+ transporting, lysosomal V0 subunit a2	A2|ARCL|ARCL2A|ATP6A2|ATP6N1D|J6B7|RTF|STV1|TJ6|TJ6M|TJ6S|VPH1|WSS	NP_036595	0	0	0.2243	0	0	0.2332	0	0	0.2225	0.226667	0.00572917	0	0	0.6891	2	2	0.5821	0	0	0.2279	0.4997	0.241389	2.20456
8702	B4GALT4	UDP-Gal:betaGlcNAc beta 1,4- galactosyltransferase, polypeptide 4	B4Gal-T4|beta4Gal-T4	NP_003769;NP_997708	0	0	0.2243	0	0	0.2332	0	0	0.2225	0.226667	0.00572917	0	0	0.6891	2	2	0.5821	0	0	0.2279	0.4997	0.241389	2.20456
573	BAG1	BCL2 associated athanogene 1	BAG-1|HAP|RAP46	NP_001165886;NP_004314	0	0	0.2243	0	0	0.2332	0	0	0.2225	0.226667	0.00572917	0	0	0.6891	2	2	0.5821	0	0	0.2279	0.4997	0.241389	2.20456
622	BDH1	3-hydroxybutyrate dehydrogenase, type 1	BDH|SDR9C1	NP_004042;NP_976059;NP_976060	0	0	0.2243	0	0	0.2332	0	0	0.2225	0.226667	0.00572917	0	0	0.6891	2	2	0.5821	0	0	0.2279	0.4997	0.241389	2.20456
22903	BTBD3	BTB (POZ) domain containing 3	dJ742J24.1	NP_001269479;NP_001269480;NP_001269481;NP_001269483;NP_055777;NP_852108	0	0	0.2243	0	0	0.2332	0	0	0.2225	0.226667	0.00572917	0	0	0.6891	2	2	0.5821	0	0	0.2279	0.4997	0.241389	2.20456
157983	C9orf66	chromosome 9 open reading frame 66	-	NP_689782	0	0	0.2243	0	0	0.2332	0	0	0.2225	0.226667	0.00572917	0	0	0.6891	2	2	0.5821	0	0	0.2279	0.4997	0.241389	2.20456
171425	CLYBL	citrate lyase beta like	CLB	NP_996531	0	0	0.2243	0	0	0.2332	0	0	0.2225	0.226667	0.00572917	0	0	0.6891	2	2	0.5821	0	0	0.2279	0.4997	0.241389	2.20456
1287	COL4A5	collagen type IV alpha 5	ASLN|ATS|CA54	NP_000486;NP_203699	0	0	0.2243	0	0	0.2332	0	0	0.2225	0.226667	0.00572917	0	0	0.6891	2	2	0.5821	0	0	0.2279	0.4997	0.241389	2.20456
51805	COQ3	coenzyme Q3 methyltransferase	DHHBMT|DHHBMTASE|UG0215E05|bA9819.1	NP_059117	0	0	0.2243	0	0	0.2332	0	0	0.2225	0.226667	0.00572917	0	0	0.6891	2	2	0.5821	0	0	0.2279	0.4997	0.241389	2.20456
153090	DAB2IP	DAB2 interacting protein	AF9Q34|AIP-1|AIP1|DIP1/2	NP_115941;NP_619723	0	0	0.2243	0	0	0.2332	0	0	0.2225	0.226667	0.00572917	0	0	0.6891	2	2	0.5821	0	0	0.2279	0.4997	0.241389	2.20456
9704	DHX34	DEAH-box helicase 34	DDX34|HRH1	NP_055496	0	0	0.2243	0	0	0.2332	0	0	0.2225	0.226667	0.00572917	0	0	0.6891	2	2	0.5821	0	0	0.2279	0.4997	0.241389	2.20456
56521	DNAJC12	DnaJ heat shock protein family (Hsp40) member C12	JDP1	NP_068572;NP_957714	0	0	0.2243	0	0	0.2332	0	0	0.2225	0.226667	0.00572917	0	0	0.6891	2	2	0.5821	0	0	0.2279	0.4997	0.241389	2.20456
64174	DPEP2	dipeptidase 2	MBD2	NP_001311088;NP_071750	0	0	0.2243	0	0	0.2332	0	0	0.2225	0.226667	0.00572917	0	0	0.6891	2	2	0.5821	0	0	0.2279	0.4997	0.241389	2.20456
25975	EGFL6	EGF like domain multiple 6	MAEG|W80	NP_001161362;NP_056322	0	0	0.2243	0	0	0.2332	0	0	0.2225	0.226667	0.00572917	0	0	0.6891	2	2	0.5821	0	0	0.2279	0.4997	0.241389	2.20456
9538	EI24	etoposide induced 2.4	EPG4|PIG8|TP53I8	NP_001277064;NP_004870	0	0	0.2243	0	0	0.2332	0	0	0.2225	0.226667	0.00572917	0	0	0.6891	2	2	0.5821	0	0	0.2279	0.4997	0.241389	2.20456
8507	ENC1	ectodermal-neural cortex 1	CCL28|ENC-1|KLHL35|KLHL37|NRPB|PIG10|TP53I10	NP_001243503;NP_001243504;NP_001243505;NP_003624	0	0	0.2243	0	0	0.2332	0	0	0.2225	0.226667	0.00572917	0	0	0.6891	2	2	0.5821	0	0	0.2279	0.4997	0.241389	2.20456
55068	ENOX1	ecto-NOX disulfide-thiol exchanger 1	CNOX|PIG38|bA64J21.1|cCNOX	NP_001121087;NP_001229792;NP_060463	0	0	0.2243	0	0	0.2332	0	0	0.2225	0.226667	0.00572917	0	0	0.6891	2	2	0.5821	0	0	0.2279	0.4997	0.241389	2.20456
2074	ERCC6	excision repair cross-complementation group 6	ARMD5|CKN2|COFS|COFS1|CSB|RAD26|UVSS1	NP_000115;NP_001263987;NP_001263988	0	0	0.2243	0	0	0.2332	0	0	0.2225	0.226667	0.00572917	0	0	0.6891	2	2	0.5821	0	0	0.2279	0.4997	0.241389	2.20456
10841	FTCD	formimidoyltransferase cyclodeaminase	LCHC1	NP_001307341;NP_006648;NP_996848	0	0	0.2243	0	0	0.2332	0	0	0.2225	0.226667	0.00572917	0	0	0.6891	2	2	0.5821	0	0	0.2279	0.4997	0.241389	2.20456
2592	GALT	galactose-1-phosphate uridylyltransferase	-	NP_000146;NP_001245261	0	0	0.2243	0	0	0.2332	0	0	0.2225	0.226667	0.00572917	0	0	0.6891	2	2	0.5821	0	0	0.2279	0.4997	0.241389	2.20456
51291	GMIP	GEM interacting protein	ARHGAP46	NP_001275927;NP_001275928;NP_057657	0	0	0.2243	0	0	0.2332	0	0	0.2225	0.226667	0.00572917	0	0	0.6891	2	2	0.5821	0	0	0.2279	0.4997	0.241389	2.20456
2874	GPS2	G protein pathway suppressor 2	AMF-1	NP_004480	0	0	0.2243	0	0	0.2332	0	0	0.2225	0.226667	0.00572917	0	0	0.6891	2	2	0.5821	0	0	0.2279	0.4997	0.241389	2.20456
2904	GRIN2B	glutamate receptor, ionotropic, N-methyl D-aspartate 2B	EIEE27|GluN2B|MRD6|NMDAR2B|NR2B|hNR3	NP_000825	0	0	0.2243	0	0	0.2332	0	0	0.2225	0.226667	0.00572917	0	0	0.6891	2	2	0.5821	0	0	0.2279	0.4997	0.241389	2.20456
55806	HR	hair growth associated	ALUNC|AU|HSA277165|HYPT4|MUHH|MUHH1	NP_005135;NP_060881	0	0	0.2243	0	0	0.2332	0	0	0.2225	0.226667	0.00572917	0	0	0.6891	1	2	0.5821	0	0	0.2279	0.4997	0.241389	2.20456
354	KLK3	kallikrein related peptidase 3	APS|KLK2A1|PSA|hK3	NP_001025218;NP_001025219;NP_001639	0	0	0.2243	0	0	0.2332	0	0	0.2225	0.226667	0.00572917	0	0	0.6891	2	2	0.5821	0	0	0.2279	0.4997	0.241389	2.20456
24141	LAMP5	lysosomal associated membrane protein family member 5	BAD-LAMP|BADLAMP|C20orf103|LAMP-5|UNC-43	NP_001186826;NP_036393	0	0	0.2243	0	0	0.2332	0	0	0.2225	0.226667	0.00572917	0	0	0.6891	2	2	0.5821	0	0	0.2279	0.4997	0.241389	2.20456
3938	LCT	lactase	LAC|LPH|LPH1	NP_002290	0	0	0.2243	0	0	0.2332	0	0	0.2225	0.226667	0.00572917	0	0	0.6891	2	2	0.5821	0	0	0.2279	0.4997	0.241389	2.20456
79649	MAP7D3	MAP7 domain containing 3	MDP3	NP_001166987;NP_001166988;NP_078873	0	0	0.2243	0	0	0.2332	0	0	0.2225	0.226667	0.00572917	0	0	0.6891	2	2	0.5821	0	0	0.2279	0.4997	0.241389	2.20456
9862	MED24	mediator complex subunit 24	ARC100|CRSP100|CRSP4|DRIP100|THRAP4|TRAP100	NP_001072986;NP_001254726;NP_055630	0	0	0.2243	0	0	0.2332	0	0	0.2225	0.226667	0.00572917	0	0	0.6891	2	2	0.5821	0	0	0.2279	0.4997	0.241389	2.20456
29079	MED4	mediator complex subunit 4	ARC36|DRIP36|HSPC126|TRAP36|VDRIP	NP_001257558;NP_054885	0	0	0.2243	0	0	0.2332	0	0	0.2225	0.226667	0.00572917	0	0	0.6891	2	2	0.5821	0	0	0.2279	0.4997	0.241389	2.20456
84315	MON1A	MON1 homolog A, secretory trafficking associated	SAND1	NP_001135973;NP_115731	0	0	0.2243	0	0	0.2332	0	0	0.2225	0.226667	0.00572917	0	0	0.6891	2	2	0.5821	0	0	0.2279	0.4997	0.241389	2.20456
4854	NOTCH3	notch 3	CADASIL|CASIL|IMF2|LMNS	NP_000426	0	0	0.2243	0	0	0.2332	0	0	0.2225	0.226667	0.00572917	0	0	0.6891	2	2	0.5821	0	0	0.2279	0.4997	0.241389	2.20456
26207	PITPNC1	phosphatidylinositol transfer protein, cytoplasmic 1	M-RDGB-beta|MRDGBbeta|RDGB-BETA|RDGBB|RDGBB1	NP_036549;NP_858057	0	0	0.2243	0	0	0.2332	0	0	0.2225	0.226667	0.00572917	0	0	0.6891	2	2	0.5821	0	0	0.2279	0.4997	0.241389	2.20456
5332	PLCB4	phospholipase C beta 4	ARCND2|PI-PLC	NP_000924;NP_001166117;NP_877949	0	0	0.2243	0	0	0.2332	0	0	0.2225	0.226667	0.00572917	0	0	0.6891	2	2	0.5821	0	0	0.2279	0.4997	0.241389	2.20456
57475	PLEKHH1	pleckstrin homology, MyTH4 and FERM domain containing H1	-	NP_065766	0	0	0.2243	0	0	0.2332	0	0	0.2225	0.226667	0.00572917	0	0	0.6891	2	2	0.5821	0	0	0.2279	0.4997	0.241389	2.20456
171568	POLR3H	polymerase (RNA) III (DNA directed) polypeptide H (22.9kD)	RPC22.9|RPC8	NP_001018060;NP_001018062;NP_001269813;NP_001269814;NP_612211	0	0	0.2243	0	0	0.2332	0	0	0.2225	0.226667	0.00572917	0	0	0.6891	1	2	0.5821	0	0	0.2279	0.4997	0.241389	2.20456
5730	PTGDS	prostaglandin D2 synthase	L-PGDS|LPGDS|PDS|PGD2|PGDS|PGDS2	NP_000945	0	0	0.2243	0	0	0.2332	0	0	0.2225	0.226667	0.00572917	0	0	0.6891	2	2	0.5821	0	0	0.2279	0.4997	0.241389	2.20456
137902	PXDNL	peroxidasin like	PMR1|PRM1|VPO2	NP_653252	0	0	0.2243	0	0	0.2332	0	0	0.2225	0.226667	0.00572917	0	0	0.6891	2	2	0.5821	0	0	0.2279	0.4997	0.241389	2.20456
5863	RGL2	ral guanine nucleotide dissociation stimulator-like 2	HKE1.5|KE1.5|RAB2L	NP_001230667;NP_004752	0	0	0.2243	0	0	0.2332	0	0	0.2225	0.226667	0.00572917	0	0	0.6891	2	2	0.5821	0	0	0.2279	0.4997	0.241389	2.20456
122042	RXFP2	relaxin/insulin-like family peptide receptor 2	GPR106|GREAT|INSL3R|LGR8|LGR8.1|RXFPR2	NP_001159530;NP_570718	0	0	0.2243	0	0	0.2332	0	0	0.2225	0.226667	0.00572917	0	0	0.6891	2	2	0.5821	0	0	0.2279	0.4997	0.241389	2.20456
6259	RYK	receptor-like tyrosine kinase	D3S3195|JTK5|JTK5A|RYK1	NP_001005861;NP_002949	0	0	0.2243	0	0	0.2332	0	0	0.2225	0.226667	0.00572917	0	0	0.6891	2	2	0.5821	0	0	0.2279	0.4997	0.241389	2.20456
6309	SC5D	sterol-C5-desaturase	ERG3|S5DES|SC5DL	NP_001020127;NP_008849	0	0	0.2243	0	0	0.2332	0	0	0.2225	0.226667	0.00572917	0	0	0.6891	2	2	0.5821	0	0	0.2279	0.4997	0.241389	2.20456
113675	SDSL	serine dehydratase-like	SDH 2|SDS-RS1|TDH|cSDH	NP_001291922;NP_612441	0	0	0.2243	0	0	0.2332	0	0	0.2225	0.226667	0.00572917	0	0	0.6891	2	2	0.5821	0	0	0.2279	0.4997	0.241389	2.20456
6574	SLC20A1	solute carrier family 20 (phosphate transporter), member 1	GLVR1|Glvr-1|PIT1|PiT-1	NP_005406	0	0	0.2243	0	0	0.2332	0	0	0.2225	0.226667	0.00572917	0	0	0.6891	2	2	0.5821	0	0	0.2279	0.4997	0.241389	2.20456
6575	SLC20A2	solute carrier family 20 (phosphate transporter), member 2	GLVR-2|GLVR2|IBGC1|IBGC3|MLVAR|PIT-2|PIT2|RAM1	NP_001244109;NP_001244110;NP_006740	0	0	0.2243	0	0	0.2332	0	0	0.2225	0.226667	0.00572917	0	0	0.6891	2	2	0.5821	0	0	0.2279	0.4997	0.241389	2.20456
60386	SLC25A19	solute carrier family 25 (mitochondrial thiamine pyrophosphate carrier), member 19	DNC|MCPHA|MUP1|THMD3|THMD4|TPC	NP_001119593;NP_001119594;NP_068380	0	0	0.2243	0	0	0.2332	0	0	0.2225	0.226667	0.00572917	0	0	0.6891	2	2	0.5821	0	0	0.2279	0.4997	0.241389	2.20456
9497	SLC4A7	solute carrier family 4, sodium bicarbonate cotransporter, member 7	NBC2|NBC3|NBCN1|SBC2|SLC4A6	NP_001245308;NP_001245309;NP_001308032;NP_001308033;NP_001308034;NP_001308035;NP_001308036;NP_001308037;NP_003606	0	0	0.2243	0	0	0.2332	0	0	0.2225	0.226667	0.00572917	0	0	0.6891	2	2	0.5821	0	0	0.2279	0.4997	0.241389	2.20456
79925	SPEF2	sperm flagellar 2	CT122|KPL2	NP_079143;NP_653323	0	0	0.2243	0	0	0.2332	0	0	0.2225	0.226667	0.00572917	0	0	0.6891	2	2	0.5821	0	0	0.2279	0.4997	0.241389	2.20456
375757	SWI5	SWI5 homologous recombination repair protein	C9orf119|SAE3	NP_001035100;NP_001305018;NP_001305021	0	0	0.2243	0	0	0.2332	0	0	0.2225	0.226667	0.00572917	0	0	0.6891	2	2	0.5821	0	0	0.2279	0.4997	0.241389	2.20456
81789	TIGD6	tigger transposable element derived 6	-	NP_001230182;NP_112215	0	0	0.2243	0	0	0.2332	0	0	0.2225	0.226667	0.00572917	0	0	0.6891	1	2	0.5821	0	0	0.2279	0.4997	0.241389	2.20456
55863	TMEM126B	transmembrane protein 126B	HT007	NP_001180466;NP_001180467;NP_001243475;NP_001243476;NP_060950	0	0	0.2243	0	0	0.2332	0	0	0.2225	0.226667	0.00572917	0	0	0.6891	2	2	0.5821	0	0	0.2279	0.4997	0.241389	2.20456
60684	TRAPPC11	trafficking protein particle complex 11	C4orf41|FOIGR|GRY|LGMD2S	NP_068761;NP_951008	0	0	0.2243	0	0	0.2332	0	0	0.2225	0.226667	0.00572917	0	0	0.6891	2	2	0.5821	0	0	0.2279	0.4997	0.241389	2.20456
83707	TRPT1	tRNA phosphotransferase 1	-	NP_001028850;NP_001153861;NP_001153862;NP_001153864;NP_001153865;NP_113660	0	0	0.2243	0	0	0.2332	0	0	0.2225	0.226667	0.00572917	0	0	0.6891	2	2	0.5821	0	0	0.2279	0.4997	0.241389	2.20456
79720	VPS37B	vacuolar protein sorting 37 homolog B (S. cerevisiae)	-	NP_078943	0	0	0.2243	0	0	0.2332	0	0	0.2225	0.226667	0.00572917	0	0	0.6891	2	2	0.5821	0	0	0.2279	0.4997	0.241389	2.20456
401551	WDR38	WD repeat domain 38	-	NP_001038941;NP_001263303;NP_001263304;NP_001263305	0	0	0.2243	0	0	0.2332	0	0	0.2225	0.226667	0.00572917	0	0	0.6891	2	2	0.5821	0	0	0.2279	0.4997	0.241389	2.20456
143570	XRRA1	X-ray radiation resistance associated 1	-	NP_001257309;NP_001257310;NP_892014	0	0	0.2243	0	0	0.2332	0	0	0.2225	0.226667	0.00572917	0	0	0.6891	2	2	0.5821	0	0	0.2279	0.4997	0.241389	2.20456
57683	ZDBF2	zinc finger, DBF-type containing 2	-	NP_001272478;NP_065974	0	0	0.2243	0	0	0.2332	0	0	0.2225	0.226667	0.00572917	0	0	0.6891	2	2	0.5821	0	0	0.2279	0.4997	0.241389	2.20456
11130	ZWINT	ZW10 interacting kinetochore protein	HZwint-1|KNTC2AP|SIP30|ZWINT1	NP_001005413;NP_008988;NP_127490	0	0	0.2243	0	0	0.2332	0	0	0.2225	0.226667	0.00572917	0	0	0.6891	2	2	0.5821	0	0	0.2279	0.4997	0.241389	2.20456
6726	SRP9	signal recognition particle 9kDa	ALURBP	NP_001123912;NP_003124	4	6	1.3012	2	2	0.6063	3	4	0.9344	0.9473	0.34763	3	6	3.9978	4	5	1.1195	4	5	1.1398	2.0857	1.65596	2.20173
9875	URB1	URB1 ribosome biogenesis 1 homolog (S. cerevisiae)	C21orf108|NPA1	NP_055640	3	3	0.7627	6	6	1.3526	1	1	0.4004	0.838567	0.480612	5	5	3.4462	5	5	1.1195	4	4	0.9574	1.84103	1.39248	2.19545
5347	PLK1	polo like kinase 1	PLK|STPK13	NP_005021	4	4	0.9422	2	2	0.6063	0	0	0.2225	0.590333	0.360116	2	3	2.3432	2	2	0.5821	4	4	0.9574	1.29423	0.92761	2.19238
10609	P3H4	prolyl 3-hydroxylase family member 4 (non-enzymatic)	LEPREL4|NO55|NOL55|SC65	NP_006446	1	1	0.4038	3	3	0.7929	2	2	0.5784	0.5917	0.194891	3	4	2.8947	2	2	0.5821	1	1	0.4103	1.2957	1.38744	2.18979
3854	KRT6B	keratin 6B, type II	CK-6B|CK6B|K6B|KRTL1|PC2|PC4	NP_005546	16	56	10.2842	20	42	8.0746	13	46	8.4156	8.9248	1.18956	20	70	39.4284	14	35	6.4967	24	68	12.6431	19.5227	17.5106	2.18747
9470	EIF4E2	eukaryotic translation initiation factor 4E family member 2	4E-LP|4EHP|EIF4EL3|IF4e	NP_001263265;NP_001263266;NP_001269887;NP_004837	0	0	0.2243	0	0	0.2332	1	1	0.4004	0.285967	0.099202	1	1	1.2404	0	0	0.2239	1	1	0.4103	0.624867	0.541154	2.1851
23014	FBXO21	F-box protein 21	FBX21	NP_055817;NP_296373	0	0	0.2243	0	0	0.2332	1	1	0.4004	0.285967	0.099202	1	1	1.2404	0	0	0.2239	1	1	0.4103	0.624867	0.541154	2.1851
222484	LNX2	ligand of numb-protein X 2	PDZRN1	NP_699202	0	0	0.2243	0	0	0.2332	1	1	0.4004	0.285967	0.099202	1	1	1.2404	0	0	0.2239	1	1	0.4103	0.624867	0.541154	2.1851
84627	ZNF469	zinc finger protein 469	BCS|BCS1	NP_001120936	0	0	0.2243	0	0	0.2332	1	1	0.4004	0.285967	0.099202	1	1	1.2404	0	0	0.2239	1	1	0.4103	0.624867	0.541154	2.1851
54805	CNNM2	cyclin and CBS domain divalent metal cation transport mediator 2	ACDP2|HOMG6|HOMGSMR	NP_060119;NP_951058;NP_951059	0	0	0.2243	0	0	0.2332	1	1	0.4004	0.285967	0.099202	1	1	1.2404	1	1	0.403	0	0	0.2279	0.623767	0.541149	2.18126
23503	ZFYVE26	zinc finger, FYVE domain containing 26	FYVE-CENT|SPG15	NP_056161	0	0	0.2243	0	0	0.2332	1	1	0.4004	0.285967	0.099202	1	1	1.2404	1	1	0.403	0	0	0.2279	0.623767	0.541149	2.18126
51806	CALML5	calmodulin like 5	CLSP	NP_059118	1	1	0.4038	0	0	0.2332	0	0	0.2225	0.2865	0.101726	1	1	1.2404	0	0	0.2239	1	1	0.4103	0.624867	0.541154	2.18104
55421	NCBP3	nuclear cap binding subunit 3	C17orf85|ELG|HSA277841	NP_001107590	1	1	0.4038	0	0	0.2332	0	0	0.2225	0.2865	0.101726	1	1	1.2404	0	0	0.2239	1	1	0.4103	0.624867	0.541154	2.18104
53916	RAB4B	RAB4B, member RAS oncogene family	-	NP_057238	2	3	0.7627	2	5	1.1661	2	5	1.1124	1.01373	0.219053	2	7	4.5495	2	5	1.1195	3	4	0.9574	2.2088	2.02873	2.17888
383	ARG1	arginase 1	-	NP_000036;NP_001231367	1	1	0.4038	0	0	0.2332	0	0	0.2225	0.2865	0.101726	1	1	1.2404	1	1	0.403	0	0	0.2279	0.623767	0.541149	2.1772
552889	ATXN7L3B	ataxin 7 like 3B	lnc-SCA7	NP_001129734	1	1	0.4038	0	0	0.2332	0	0	0.2225	0.2865	0.101726	1	1	1.2404	1	1	0.403	0	0	0.2279	0.623767	0.541149	2.1772
701	BUB1B	BUB1 mitotic checkpoint serine/threonine kinase B	BUB1beta|BUBR1|Bub1A|MAD3L|MVA1|SSK1|hBUBR1	NP_001202	1	1	0.4038	0	0	0.2332	0	0	0.2225	0.2865	0.101726	1	1	1.2404	1	1	0.403	0	0	0.2279	0.623767	0.541149	2.1772
22839	DLGAP4	discs large homolog associated protein 4	DAP-4|DAP4|DLP4|SAPAP-4|SAPAP4	NP_001035951;NP_055717;NP_892118	1	1	0.4038	0	0	0.2332	0	0	0.2225	0.2865	0.101726	1	1	1.2404	1	1	0.403	0	0	0.2279	0.623767	0.541149	2.1772
1810	DR1	down-regulator of transcription 1	NC2|NC2-BETA	NP_001929	1	1	0.4038	0	0	0.2332	0	0	0.2225	0.2865	0.101726	1	1	1.2404	1	1	0.403	0	0	0.2279	0.623767	0.541149	2.1772
63897	HEATR6	HEAT repeat containing 6	ABC1	NP_071353	1	1	0.4038	0	0	0.2332	0	0	0.2225	0.2865	0.101726	1	1	1.2404	1	1	0.403	0	0	0.2279	0.623767	0.541149	2.1772
9209	LRRFIP2	leucine rich repeat (in FLII) interacting protein 2	HUFI-2	NP_001127841;NP_001269620;NP_006300;NP_060194	1	1	0.4038	0	0	0.2332	0	0	0.2225	0.2865	0.101726	1	1	1.2404	1	1	0.403	0	0	0.2279	0.623767	0.541149	2.1772
9172	MYOM2	myomesin 2	TTNAP	NP_003961	1	1	0.4038	0	0	0.2332	0	0	0.2225	0.2865	0.101726	1	1	1.2404	1	1	0.403	0	0	0.2279	0.623767	0.541149	2.1772
253959	RALGAPA1	Ral GTPase activating protein catalytic alpha subunit 1	GARNL1|GRIPE|RalGAPalpha1|TULIP1|p240	NP_001269972;NP_001269973;NP_055805;NP_919277	1	1	0.4038	0	0	0.2332	0	0	0.2225	0.2865	0.101726	1	1	1.2404	1	1	0.403	0	0	0.2279	0.623767	0.541149	2.1772
54557	SGTB	small glutamine-rich tetratricopeptide repeat (TPR)-containing, beta	SGT2	NP_061945	1	1	0.4038	0	0	0.2332	0	0	0.2225	0.2865	0.101726	1	1	1.2404	1	1	0.403	0	0	0.2279	0.623767	0.541149	2.1772
4780	NFE2L2	nuclear factor, erythroid 2 like 2	HEBP1|NRF2	NP_001138884;NP_001138885;NP_001300829;NP_001300830;NP_001300831;NP_001300832;NP_001300833;NP_006155	0	0	0.2243	0	0	0.2332	1	1	0.4004	0.285967	0.099202	0	0	0.6891	1	1	0.403	2	3	0.775	0.622367	0.194772	2.17636
80179	MYO19	myosin XIX	MYOHD1	NP_001028752;NP_001157207;NP_079385	0	0	0.2243	0	0	0.2332	1	1	0.4004	0.285967	0.099202	0	0	0.6891	2	2	0.5821	2	2	0.5926	0.621267	0.0589795	2.17251
8559	PRPF18	pre-mRNA processing factor 18	PRP18|hPrp18	NP_003666	0	0	0.2243	0	0	0.2332	1	1	0.4004	0.285967	0.099202	0	0	0.6891	2	2	0.5821	2	2	0.5926	0.621267	0.0589795	2.17251
3024	HIST1H1A	histone cluster 1, H1a	H1.1|H1A|H1F1|HIST1	NP_005316	3	8	1.6602	6	8	1.7259	4	8	1.6464	1.6775	0.0424798	1	6	3.9978	12	26	4.8829	5	10	2.0518	3.64417	1.4483	2.17238
161931	ADAD2	adenosine deaminase domain containing 2	TENRL	NP_001138872;NP_631913	1	1	0.4038	0	0	0.2332	0	0	0.2225	0.2865	0.101726	0	0	0.6891	1	1	0.403	3	3	0.775	0.622367	0.194772	2.17231
253782	CERS6	ceramide synthase 6	CERS5|LASS6	NP_001243055;NP_982288	1	1	0.4038	0	0	0.2332	0	0	0.2225	0.2865	0.101726	0	0	0.6891	1	2	0.5821	2	2	0.5926	0.621267	0.0589795	2.16847
5585	PKN1	protein kinase N1	DBK|PAK-1|PAK1|PKN|PKN-ALPHA|PRK1|PRKCL1	NP_002732;NP_998725	1	1	0.4038	0	0	0.2332	0	0	0.2225	0.2865	0.101726	0	0	0.6891	2	2	0.5821	2	2	0.5926	0.621267	0.0589795	2.16847
10166	SLC25A15	solute carrier family 25 (mitochondrial carrier; ornithine transporter) member 15	D13S327|HHH|ORC1|ORNT1	NP_055067	0	0	0.2243	0	0	0.2332	1	1	0.4004	0.285967	0.099202	0	0	0.6891	4	4	0.9404	0	0	0.2279	0.619133	0.361366	2.16505
159013	CXorf38	chromosome X open reading frame 38	-	NP_659407	1	1	0.4038	0	0	0.2332	0	0	0.2225	0.2865	0.101726	0	0	0.6891	3	3	0.7612	1	1	0.4103	0.6202	0.185319	2.16475
5362	PLXNA2	plexin A2	OCT|PLXN2	NP_079455	0	0	0.2243	1	1	0.4197	0	0	0.2225	0.288833	0.113337	1	1	1.2404	0	0	0.2239	1	1	0.4103	0.624867	0.541154	2.16342
54962	TIPIN	TIMELESS interacting protein	-	NP_001276915;NP_060328	0	0	0.2243	1	1	0.4197	0	0	0.2225	0.288833	0.113337	1	1	1.2404	0	0	0.2239	1	1	0.4103	0.624867	0.541154	2.16342
7148	TNXB	tenascin XB	EDS3|HXBL|TENX|TN-X|TNX|TNXB1|TNXB2|TNXBS|VUR8|XB|XBS	NP_061978;NP_115859	0	0	0.2243	1	1	0.4197	0	0	0.2225	0.288833	0.113337	1	1	1.2404	0	0	0.2239	1	1	0.4103	0.624867	0.541154	2.16342
137492	VPS37A	vacuolar protein sorting 37 homolog A (S. cerevisiae)	HCRP1|PQBP2|SPG53	NP_001138624;NP_689628	0	0	0.2243	1	1	0.4197	0	0	0.2225	0.288833	0.113337	1	1	1.2404	0	0	0.2239	1	1	0.4103	0.624867	0.541154	2.16342
10962	MLLT11	myeloid/lymphoid or mixed-lineage leukemia; translocated to, 11	AF1Q	NP_006809	1	2	0.5833	1	3	0.7929	2	3	0.7564	0.710867	0.111973	3	4	2.8947	2	4	0.9404	1	3	0.775	1.5367	1.17897	2.16173
9372	ZFYVE9	zinc finger, FYVE domain containing 9	MADHIP|NSP|PPP1R173|SARA|SMADIP	NP_004790;NP_015563	1	1	0.4038	0	0	0.2332	0	0	0.2225	0.2865	0.101726	0	0	0.6891	4	4	0.9404	0	0	0.2279	0.619133	0.361366	2.16102
54897	CASZ1	castor zinc finger 1	CAS11|CST|SRG|ZNF693|dJ734G22.1	NP_001073312;NP_060236	0	0	0.2243	1	1	0.4197	0	0	0.2225	0.288833	0.113337	1	1	1.2404	1	1	0.403	0	0	0.2279	0.623767	0.541149	2.15961
127602	DNAH14	dynein, axonemal, heavy chain 14	C1orf67|Dnahc14|HL-18|HL18	NP_001138626;NP_001364;NP_659426	0	0	0.2243	1	1	0.4197	0	0	0.2225	0.288833	0.113337	1	1	1.2404	1	1	0.403	0	0	0.2279	0.623767	0.541149	2.15961
100652824	KIAA2012	KIAA2012	-	NP_001264301	0	0	0.2243	1	1	0.4197	0	0	0.2225	0.288833	0.113337	1	1	1.2404	1	1	0.403	0	0	0.2279	0.623767	0.541149	2.15961
83937	RASSF4	Ras association (RalGDS/AF-6) domain family member 4	AD037	NP_114412	0	0	0.2243	1	1	0.4197	0	0	0.2225	0.288833	0.113337	1	1	1.2404	1	1	0.403	0	0	0.2279	0.623767	0.541149	2.15961
9990	SLC12A6	solute carrier family 12 (potassium/chloride transporter), member 6	ACCPN|KCC3|KCC3A|KCC3B	NP_001035959;NP_001035960;NP_001035961;NP_001035962;NP_005126;NP_598408	0	0	0.2243	1	1	0.4197	0	0	0.2225	0.288833	0.113337	1	1	1.2404	1	1	0.403	0	0	0.2279	0.623767	0.541149	2.15961
6616	SNAP25	synaptosome associated protein 25kDa	CMS18|RIC-4|RIC4|SEC9|SNAP|SNAP-25|bA416N4.2|dJ1068F16.2	NP_001309831;NP_001309832;NP_001309833;NP_001309834;NP_001309835;NP_001309836;NP_001309837;NP_001309838;NP_001309839;NP_003072;NP_570824	0	0	0.2243	1	1	0.4197	0	0	0.2225	0.288833	0.113337	1	1	1.2404	1	1	0.403	0	0	0.2279	0.623767	0.541149	2.15961
6894	TARBP1	TAR (HIV-1) RNA binding protein 1	TRM3|TRP-185|TRP185	NP_005637	0	0	0.2243	1	1	0.4197	0	0	0.2225	0.288833	0.113337	1	1	1.2404	1	1	0.403	0	0	0.2279	0.623767	0.541149	2.15961
64222	TOR3A	torsin family 3 member A	ADIR|ADIR2	NP_071766	0	0	0.2243	1	1	0.4197	0	0	0.2225	0.288833	0.113337	0	0	0.6891	0	0	0.2239	4	4	0.9574	0.623467	0.371128	2.15857
57521	RPTOR	regulatory associated protein of MTOR, complex 1	KOG1|Mip1	NP_001156506;NP_065812	0	0	0.2243	0	0	0.2332	2	2	0.5784	0.3453	0.20192	1	1	1.2404	1	1	0.403	2	2	0.5926	0.745333	0.439096	2.15851
10557	RPP38	ribonuclease P/MRP 38kDa subunit	-	NP_001091059;NP_001252530;NP_006405;NP_892117	1	1	0.4038	0	0	0.2332	1	1	0.4004	0.3458	0.0975293	1	1	1.2404	1	1	0.403	2	2	0.5926	0.745333	0.439096	2.15539
491	ATP2B2	ATPase, Ca++ transporting, plasma membrane 2	PMCA2|PMCA2a|PMCA2i	NP_001001331;NP_001674	5	5	1.1217	3	4	0.9795	5	6	1.2904	1.13053	0.155638	3	3	2.3432	13	14	2.7321	9	11	2.2342	2.4365	0.261734	2.15518
2261	FGFR3	fibroblast growth factor receptor 3	ACH|CD333|CEK2|HSFGFR3EX|JTK4	NP_000133;NP_001156685;NP_075254	1	2	0.5833	1	4	0.9795	1	2	0.5784	0.713733	0.230174	2	4	2.8947	1	3	0.7612	1	4	0.9574	1.53777	1.17923	2.15454
2264	FGFR4	fibroblast growth factor receptor 4	CD334|JTK2|TKF	NP_001278909;NP_002002;NP_075252;NP_998812	1	2	0.5833	1	4	0.9795	1	2	0.5784	0.713733	0.230174	1	3	2.3432	1	3	0.7612	4	7	1.5045	1.5363	0.791479	2.15248
1373	CPS1	carbamoyl-phosphate synthase 1	CPSASE1|PHN	NP_001116105;NP_001116106;NP_001866	1	1	0.4038	0	0	0.2332	1	1	0.4004	0.3458	0.0975293	1	1	1.2404	2	2	0.5821	1	1	0.4103	0.744267	0.438167	2.1523
8487	GEMIN2	gem nuclear organelle associated protein 2	SIP1|SIP1-delta	NP_001009182;NP_001009183;NP_003607	1	1	0.4038	0	0	0.2332	1	1	0.4004	0.3458	0.0975293	1	1	1.2404	2	2	0.5821	1	1	0.4103	0.744267	0.438167	2.1523
284371	ZNF841	zinc finger protein 841	-	NP_001129971;NP_001308278	1	1	0.4038	0	0	0.2332	1	1	0.4004	0.3458	0.0975293	1	1	1.2404	1	2	0.5821	1	1	0.4103	0.744267	0.438167	2.1523
84687	PPP1R9B	protein phosphatase 1 regulatory subunit 9B	PPP1R6|PPP1R9|SPINO|Spn	NP_115984	5	5	1.1217	1	1	0.4197	3	3	0.7564	0.765933	0.351097	2	2	1.7917	10	11	2.1945	4	4	0.9574	1.64787	0.630968	2.15145
112840	WDR89	WD repeat domain 89	C14orf150|MSTP050	NP_001008726;NP_001245201;NP_542397	0	0	0.2243	1	1	0.4197	0	0	0.2225	0.288833	0.113337	0	0	0.6891	2	2	0.5821	2	2	0.5926	0.621267	0.0589795	2.15095
10927	SPIN1	spindlin 1	SPIN	NP_006708	1	1	0.4038	0	0	0.2332	1	1	0.4004	0.3458	0.0975293	1	1	1.2404	3	3	0.7612	0	0	0.2279	0.743167	0.506491	2.14912
150786	WTH3DI	RAB6C-like	-	NP_001071105	0	0	0.2243	1	1	0.4197	0	0	0.2225	0.288833	0.113337	0	0	0.6891	2	3	0.7612	1	1	0.4103	0.6202	0.185319	2.14726
2263	FGFR2	fibroblast growth factor receptor 2	BBDS|BEK|BFR-1|CD332|CEK3|CFD1|ECT1|JWS|K-SAM|KGFR|TK14|TK25	NP_000132;NP_001138385;NP_001138386;NP_001138387;NP_001138388;NP_001138389;NP_001138390;NP_001138391;NP_001307583;NP_001307587;NP_075259;NP_075418	1	2	0.5833	1	4	0.9795	2	3	0.7564	0.773067	0.198625	2	4	2.8947	1	3	0.7612	3	6	1.3222	1.65937	1.10599	2.14647
64795	RMND5A	required for meiotic nuclear division 5 homolog A	CTLH|GID2|GID2A|RMD5|p44CTLH	NP_073617	0	0	0.2243	0	0	0.2332	2	2	0.5784	0.3453	0.20192	0	0	0.6891	3	4	0.9404	2	2	0.5926	0.7407	0.17955	2.14509
11346	SYNPO	synaptopodin	-	NP_001103444;NP_001159680;NP_001159681;NP_009217	0	0	0.2243	0	0	0.2332	2	2	0.5784	0.3453	0.20192	0	0	0.6891	5	5	1.1195	1	1	0.4103	0.739633	0.35729	2.142
64223	MLST8	MTOR associated protein, LST8 homolog	GBL|GbetaL|LST8|POP3|WAT1	NP_001186102;NP_001186103;NP_001186104;NP_071767	2	2	0.5833	0	0	0.2332	0	0	0.2225	0.346333	0.205289	0	0	0.6891	3	3	0.7612	3	3	0.775	0.741767	0.0461296	2.14177
200185	KRTCAP2	keratinocyte associated protein 2	KCP2	NP_776251	0	0	0.2243	1	1	0.4197	1	1	0.4004	0.348133	0.107676	1	1	1.2404	1	1	0.403	2	2	0.5926	0.745333	0.439096	2.14094
57111	RAB25	RAB25, member RAS oncogene family	CATX-8|RAB11C	NP_065120	0	0	0.2243	1	1	0.4197	1	1	0.4004	0.348133	0.107676	1	1	1.2404	1	1	0.403	2	2	0.5926	0.745333	0.439096	2.14094
10813	UTP14A	UTP14A small subunit processome component	NYCO16|SDCCAG16|dJ537K23.3	NP_001159693;NP_006640	8	8	1.6602	0	0	0.2332	4	4	0.9344	0.9426	0.713535	3	3	2.3432	9	9	1.8361	8	9	1.8694	2.01623	0.283651	2.13901
79187	FSD1	fibronectin type III and SPRY domain containing 1	GLFND|MIR1	NP_077309	3	3	0.7627	0	0	0.2332	0	0	0.2225	0.406133	0.308842	2	2	1.7917	1	1	0.403	1	1	0.4103	0.868333	0.799667	2.13805
4440	MSI1	musashi RNA binding protein 1	-	NP_002433	1	1	0.4038	1	1	0.4197	0	0	0.2225	0.348667	0.109552	1	1	1.2404	1	1	0.403	1	2	0.5926	0.745333	0.439096	2.13767
25939	SAMHD1	SAM domain and HD domain 1	CHBL2|DCIP|HDDC1|MOP-5|SBBI88	NP_056289	2	2	0.5833	0	0	0.2332	2	2	0.5784	0.464967	0.200731	3	3	2.3432	1	1	0.403	0	0	0.2279	0.991367	1.17399	2.13212
8624	PSMG1	proteasome (prosome, macropain) assembly chaperone 1	C21LRP|DSCR2|LRPC21|PAC-1|PAC1	NP_001248753;NP_001307724;NP_003711;NP_982257	2	2	0.5833	0	0	0.2332	1	1	0.4004	0.405633	0.175109	1	1	1.2404	2	3	0.7612	2	2	0.5926	0.864733	0.336081	2.13181
8226	PUDP	pseudouridine 5'-phosphatase	DXF68S1E|FAM16AX|GS1|HDHD1|HDHD1A	NP_001129037;NP_001171606;NP_001171607;NP_036212	1	1	0.4038	1	1	0.4197	1	1	0.4004	0.407967	0.0103026	1	2	1.7917	0	0	0.2239	2	2	0.5926	0.8694	0.819733	2.13106
9181	ARHGEF2	Rho/Rac guanine nucleotide exchange factor 2	GEF|GEF-H1|GEFH1|LFP40|P40	NP_001155855;NP_001155856;NP_004714	10	10	2.0193	5	5	1.1661	4	5	1.1124	1.4326	0.508806	4	4	2.8947	12	12	2.3737	15	20	3.8763	3.04823	0.762975	2.12776
5335	PLCG1	phospholipase C gamma 1	NCKAP3|PLC-II|PLC1|PLC148|PLCgamma1	NP_002651;NP_877963	12	13	2.5579	4	4	0.9795	6	7	1.4684	1.6686	0.80802	9	11	6.7568	8	9	1.8361	9	10	2.0518	3.54823	2.78079	2.12647
741	ZNHIT2	zinc finger, HIT-type containing 2	C11orf5|FON	NP_055020	1	1	0.4038	1	1	0.4197	1	1	0.4004	0.407967	0.0103026	1	1	1.2404	2	2	0.5821	3	3	0.775	0.865833	0.338419	2.12231
55798	METTL2B	methyltransferase like 2B	METL|METTL2|METTL2A|PSENIP1	NP_060866	0	0	0.2243	1	1	0.4197	2	2	0.5784	0.407467	0.177367	1	1	1.2404	3	3	0.7612	2	2	0.5926	0.864733	0.336081	2.12222
64756	ATPAF1	ATP synthase mitochondrial F1 complex assembly factor 1	ATP11|ATP11p	NP_001036011;NP_001230657;NP_001243347;NP_073582	2	2	0.5833	0	0	0.2332	2	2	0.5784	0.464967	0.200731	2	2	1.7917	4	4	0.9404	0	0	0.2279	0.986667	0.782926	2.12202
27295	PDLIM3	PDZ and LIM domain 3	ALP	NP_001107579;NP_001244891;NP_001244892;NP_055291	3	3	0.7627	0	0	0.2332	0	0	0.2225	0.406133	0.308842	0	0	0.6891	5	5	1.1195	3	3	0.775	0.8612	0.22778	2.12049
326624	RAB37	RAB37, member RAS oncogene family	-	NP_001006639;NP_001157461;NP_001157462;NP_783865	2	3	0.7627	2	5	1.1661	1	5	1.1124	1.01373	0.219053	2	7	4.5495	2	5	1.1195	1	3	0.775	2.148	2.08688	2.1189
81553	FAM49A	family with sequence similarity 49 member A	-	NP_110424	1	1	0.4038	1	1	0.4197	1	1	0.4004	0.407967	0.0103026	1	1	1.2404	3	4	0.9404	1	1	0.4103	0.8637	0.420332	2.11708
51616	TAF9B	TATA-box binding protein associated factor 9b	DN-7|DN7|TAF9L|TAFII31L|TFIID-31	NP_057059	0	0	0.2243	2	2	0.6063	0	0	0.2225	0.351033	0.221069	1	1	1.2404	3	3	0.7612	0	0	0.2279	0.743167	0.506491	2.11708
57619	SHROOM3	shroom family member 3	APXL3|MSTP013|SHRM|ShrmL	NP_065910	1	8	1.6602	2	9	1.9125	2	5	1.1124	1.5617	0.409044	2	10	6.2049	3	11	2.1945	1	7	1.5045	3.3013	2.53815	2.11391
9722	NOS1AP	nitric oxide synthase 1 adaptor protein	6330408P19Rik|CAPON	NP_001119532;NP_001158229;NP_055512	0	0	0.2243	2	2	0.6063	1	1	0.4004	0.410333	0.191194	1	2	1.7917	2	2	0.5821	0	0	0.2279	0.867233	0.819965	2.11348
5814	PURB	purine-rich element binding protein B	PURBETA	NP_150093	4	4	0.9422	4	4	0.9795	5	5	1.1124	1.01137	0.089463	2	3	2.3432	10	12	2.3737	8	8	1.6869	2.1346	0.388019	2.11061
8120	AP3B2	adaptor related protein complex 3 beta 2 subunit	NAPTB	NP_001265440;NP_001265441;NP_004635	1	1	0.4038	1	1	0.4197	2	2	0.5784	0.4673	0.0965433	1	1	1.2404	4	4	0.9404	3	3	0.775	0.985267	0.235922	2.10842
389541	LAMTOR4	late endosomal/lysosomal adaptor, MAPK and MTOR activator 4	C7orf59	NP_001008396;NP_001305165;NP_001305166	2	2	0.5833	1	1	0.4197	2	2	0.5784	0.527133	0.0930722	1	2	1.7917	3	3	0.7612	3	3	0.775	1.1093	0.591016	2.1044
5747	PTK2	protein tyrosine kinase 2	FADK|FAK|FAK1|FRNK|PPP1R71|p125FAK|pp125FAK	NP_001186578;NP_001303271;NP_005598;NP_722560	1	1	0.4038	1	1	0.4197	3	3	0.7564	0.526633	0.199143	0	0	0.6891	6	6	1.2987	6	6	1.3222	1.10333	0.358929	2.09507
57488	ESYT2	extended synaptotagmin like protein 2	CHR2SYT|E-Syt2|FAM62B	NP_065779	1	1	0.4038	2	2	0.6063	2	2	0.5784	0.5295	0.10975	2	2	1.7917	3	3	0.7612	3	3	0.775	1.1093	0.591016	2.095
55291	PPP6R3	protein phosphatase 6 regulatory subunit 3	C11orf23|PP6R3|SAP190|SAPL|SAPLa|SAPS3	NP_001157632;NP_001157633;NP_001157634;NP_001157635;NP_001157636;NP_060782	9	9	1.8397	4	4	0.9795	4	6	1.2904	1.36987	0.435571	3	5	3.4462	15	15	2.9113	11	11	2.2342	2.8639	0.607389	2.09064
124454	EARS2	glutamyl-tRNA synthetase 2, mitochondrial	COXPD12|MSE1|gluRS	NP_001077083;NP_001295140	1	1	0.4038	3	3	0.7929	1	1	0.4004	0.532367	0.225635	3	3	2.3432	2	2	0.5821	1	1	0.4103	1.11187	1.06982	2.08854
23673	STX12	syntaxin 12	STX13|STX14	NP_803173	3	4	0.9422	1	1	0.4197	1	1	0.4004	0.587433	0.307388	2	2	1.7917	6	7	1.4778	1	1	0.4103	1.2266	0.72415	2.08807
55206	SBNO1	strawberry notch homolog 1 (Drosophila)	MOP3|Sno	NP_001161328;NP_060653	6	6	1.3012	1	1	0.4197	2	2	0.5784	0.766433	0.46987	3	4	2.8947	5	5	1.1195	3	3	0.775	1.5964	1.13748	2.08289
1636	ACE	angiotensin I converting enzyme	ACE1|CD143|DCP|DCP1|ICH|MVCD3	NP_000780;NP_001171528;NP_690043	1	1	0.4038	3	3	0.7929	3	3	0.7564	0.651033	0.214887	3	3	2.3432	3	3	0.7612	4	4	0.9574	1.35393	0.862328	2.07967
1385	CREB1	cAMP responsive element binding protein 1	CREB	NP_001307722;NP_004370;NP_604391	1	1	0.4038	3	3	0.7929	1	1	0.4004	0.532367	0.225635	1	1	1.2404	5	5	1.1195	3	4	0.9574	1.10577	0.141999	2.07708
7264	TSTA3	tissue specific transplantation antigen P35B	FX|P35B|SDR4E1	NP_003304;NP_001304712	6	7	1.4807	3	3	0.7929	4	4	0.9344	1.06933	0.363211	5	5	3.4462	5	5	1.1195	10	10	2.0518	2.20583	1.17097	2.06281
23307	FKBP15	FK506 binding protein 15	FKBP133|KIAA0674|PPP1R76	NP_056073	10	10	2.0193	1	1	0.4197	2	2	0.5784	1.0058	0.881296	2	2	1.7917	13	14	2.7321	7	8	1.6869	2.07023	0.575584	2.0583
79882	ZC3H14	zinc finger CCCH-type containing 14	MSUT-2|NY-REN-37|SUT2|UKp68	NP_001153575;NP_001153576;NP_001313224;NP_001313225;NP_001313226;NP_001313227;NP_001313228;NP_001313229;NP_001313230;NP_001313231;NP_001313232;NP_001313233;NP_001313234;NP_001313235;NP_001313236;NP_001313237;NP_001313238;NP_001313239;NP_001313240;NP_001313241;NP_001313242;NP_001313243;NP_001313244;NP_001313245;NP_079100;NP_997543;NP_997544;NP_997545	4	4	0.9422	4	4	0.9795	4	5	1.1124	1.01137	0.089463	3	5	3.4462	8	8	1.657	3	5	1.1398	2.081	1.21025	2.05761
3006	HIST1H1C	histone cluster 1, H1c	H1.2|H1C|H1F2|H1s-1	NP_005310	16	40	7.4079	20	38	7.3273	12	27	5.0298	6.58833	1.35033	10	36	20.5747	28	73	13.3161	12	34	6.4317	13.4408	7.07233	2.0401
54521	WDR44	WD repeat domain 44	RAB11BP|RPH11	NP_001171894;NP_001171895;NP_061918	5	5	1.1217	0	0	0.2332	3	3	0.7564	0.703767	0.446582	2	3	2.3432	8	8	1.657	0	0	0.2279	1.40937	1.07917	2.00261
10409	BASP1	brain abundant membrane attached signal protein 1	CAP-23|CAP23|NAP-22|NAP22	NP_001258535;NP_006308	7	7	1.4807	4	4	0.9795	3	3	0.7564	1.0722	0.370941	5	6	3.9978	4	5	1.1195	6	6	1.3222	2.1465	1.60647	2.00196
23236	PLCB1	phospholipase C beta 1	EIEE12|PI-PLC|PLC-154|PLC-I|PLC154|PLCB1A|PLCB1B	NP_056007;NP_877398	2	2	0.5833	0	0	0.2332	4	4	0.9344	0.583633	0.3506	2	2	1.7917	5	5	1.1195	2	2	0.5926	1.16793	0.601015	2.00114
54539	NDUFB11	NADH:ubiquinone oxidoreductase subunit B11	CI-ESSS|ESSS|LSDMCA3|NP17.3|Np15|P17.3	NP_001129470;NP_061929	4	6	1.3012	3	6	1.3526	4	9	1.8244	1.49273	0.288379	0	0	0.6891	2	2	0.5821	2	4	0.9574	0.742867	0.193341	0.497655
8099	CDK2AP1	cyclin-dependent kinase 2 associated protein 1	DOC1|DORC1|ST19|doc-1|p12DOC-1	NP_001257362;NP_001257363;NP_004633	4	7	1.4807	4	5	1.1661	5	7	1.4684	1.37173	0.17819	0	0	0.6891	2	2	0.5821	3	3	0.775	0.682067	0.0966421	0.49723
26278	SACS	sacsin molecular chaperone	ARSACS|DNAJC29|PPP1R138|SPAX6	NP_001264984;NP_055178	20	20	3.8148	22	23	4.5258	2	2	0.5784	2.973	2.10403	2	2	1.7917	2	2	0.5821	10	10	2.0518	1.4752	0.784305	0.496199
131076	CCDC58	coiled-coil domain containing 58	-	NP_001017928;NP_001295255	4	5	1.1217	5	7	1.5392	6	11	2.1805	1.6138	0.533328	0	0	0.6891	3	5	1.1195	2	2	0.5926	0.8004	0.280529	0.495972
23265	EXOC7	exocyst complex component 7	2-5-3p|EX070|EXO70|EXOC1|Exo70p|YJL085W	NP_001013861;NP_001138769;NP_001138770;NP_001138771;NP_001269242;NP_001269243;NP_056034	5	5	1.1217	7	7	1.5392	3	5	1.1124	1.25777	0.243773	0	0	0.6891	0	0	0.2239	4	4	0.9574	0.623467	0.371128	0.495693
81689	ISCA1	iron-sulfur cluster assembly 1	HBLD2|ISA1|hIscA	NP_112202	5	6	1.3012	7	8	1.7259	6	7	1.4684	1.4985	0.213944	0	0	0.6891	3	3	0.7612	3	3	0.775	0.741767	0.0461296	0.495006
5438	POLR2I	polymerase (RNA) II (DNA directed) polypeptide I, 14.5kDa	RPB9|hRPB14.5	NP_006224	4	4	0.9422	5	5	1.1661	4	4	0.9344	1.01423	0.131578	0	0	0.6891	0	0	0.2239	2	2	0.5926	0.501867	0.245514	0.494824
65264	UBE2Z	ubiquitin conjugating enzyme E2Z	HOYS7|USE1	NP_075567	4	4	0.9422	7	7	1.5392	6	6	1.2904	1.25727	0.299876	0	0	0.6891	2	2	0.5821	2	2	0.5926	0.621267	0.0589795	0.494141
10577	NPC2	Niemann-Pick disease, type C2	EDDM1|HE1	NP_006423	3	3	0.7627	2	3	0.7929	3	3	0.7564	0.770667	0.0195106	0	0	0.6891	0	0	0.2239	0	0	0.2279	0.3803	0.267436	0.493469
51646	YPEL5	yippee like 5	CGI-127	NP_001120871;NP_001120872;NP_001120873;NP_057145	3	3	0.7627	3	3	0.7929	3	3	0.7564	0.770667	0.0195106	0	0	0.6891	0	0	0.2239	0	0	0.2279	0.3803	0.267436	0.493469
5440	POLR2K	polymerase (RNA) II (DNA directed) polypeptide K, 7.0kDa	ABC10-alpha|RPABC4|RPB10alpha|RPB12|RPB7.0|hRPB7.0|hsRPB10a	NP_005025	3	4	0.9422	3	3	0.7929	2	2	0.5784	0.771167	0.182871	0	0	0.6891	0	0	0.2239	0	0	0.2279	0.3803	0.267436	0.493149
5660	PSAP	prosaposin	GLBA|SAP1	NP_001035930;NP_001035931;NP_002769	15	28	5.2517	11	14	2.8456	10	14	2.7146	3.60397	1.42848	2	3	2.3432	7	8	1.657	4	6	1.3222	1.77413	0.520481	0.492272
57634	EP400	E1A binding protein p400	CAGH32|P400|TNRC12	NP_056224	39	43	7.9471	35	38	7.3273	12	12	2.3585	5.87763	3.06337	1	1	1.2404	10	10	2.0153	27	28	5.3363	2.864	2.17585	0.487271
6206	RPS12	ribosomal protein S12	S12	NP_001007	10	25	4.7129	11	21	4.1524	12	21	3.9611	4.27547	0.390717	3	3	2.3432	7	10	2.0153	5	9	1.8694	2.07597	0.242656	0.485553
6993	DYNLT1	dynein, light chain, Tctex-type 1	CW-1|TCTEL1|tctex-1	NP_001278531;NP_001278532;NP_006510	3	10	2.0193	6	8	1.7259	6	10	2.0024	1.91587	0.164733	0	0	0.6891	3	5	1.1195	2	4	0.9574	0.922	0.217373	0.481244
7555	CNBP	CCHC-type zinc finger, nucleic acid binding protein	CNBP1|DM2|PROMM|RNF163|ZCCHC22|ZNF9	NP_001120664;NP_001120665;NP_001120666;NP_001120667;NP_001120668;NP_003409	9	19	3.6352	10	12	2.4723	9	10	2.0024	2.7033	0.840553	2	2	1.7917	1	1	0.403	6	8	1.6869	1.29387	0.773291	0.478625
633	BGN	biglycan	DSPG1|PG-S1|PGI|SLRR1A	NP_001702	5	6	1.3012	6	7	1.5392	6	9	1.8244	1.55493	0.261955	0	0	0.6891	3	3	0.7612	3	3	0.775	0.741767	0.0461296	0.477041
83443	SF3B5	splicing factor 3b subunit 5	SF3b10|Ysf3	NP_112577	4	7	1.4807	4	7	1.5392	3	6	1.2904	1.43677	0.130088	0	0	0.6891	2	2	0.5821	3	3	0.775	0.682067	0.0966421	0.474723
54454	ATAD2B	ATPase family, AAA domain containing 2B	-	NP_001229267;NP_060022	9	9	1.8397	11	11	2.2857	2	2	0.5784	1.56793	0.885501	1	1	1.2404	3	3	0.7612	0	0	0.2279	0.743167	0.506491	0.473978
4756	NEO1	neogenin 1	IGDCC2|NGN|NTN1R2	NP_001166094;NP_001166095;NP_002490	8	9	1.8397	7	8	1.7259	3	3	0.7564	1.44067	0.595318	0	0	0.6891	2	2	0.5821	3	3	0.775	0.682067	0.0966421	0.473438
116540	MRPL53	mitochondrial ribosomal protein L53	L53MT	NP_444278	5	6	1.3012	5	6	1.3526	5	6	1.2904	1.31473	0.0332351	0	0	0.6891	2	3	0.7612	1	1	0.4103	0.6202	0.185319	0.471731
2195	FAT1	FAT atypical cadherin 1	CDHF7|CDHR8|FAT|ME5|hFat1	NP_005236	12	12	2.3783	4	4	0.9795	0	0	0.2225	1.19343	1.09371	0	0	0.6891	0	0	0.2239	3	3	0.775	0.562667	0.296508	0.471469
2186	BPTF	bromodomain PHD finger transcription factor	FAC1|FALZ|NURF301	NP_004450;NP_872579	42	43	7.9471	40	41	7.8878	19	19	3.605	6.47997	2.48997	1	1	1.2404	11	11	2.1945	27	30	5.7014	3.04543	2.34908	0.469977
10847	SRCAP	Snf2-related CREBBP activator protein	DOMO1|EAF1|FLHS|SWR1	NP_006653	29	29	5.4314	17	17	3.4056	4	4	0.9344	3.25713	2.25217	0	0	0.6891	5	5	1.1195	14	14	2.7815	1.53003	1.10496	0.469748
10204	NUTF2	nuclear transport factor 2	NTF2|PP15	NP_001308967;NP_001308968;NP_001308969;NP_001308970;NP_005787	4	21	3.9944	6	14	2.8456	3	11	2.1805	3.00683	0.917636	1	1	1.2404	2	8	1.657	4	6	1.3222	1.40653	0.220733	0.467779
2280	FKBP1A	FK506 binding protein 1A	FKBP-12|FKBP-1A|FKBP1|FKBP12|PKC12|PKCI2|PPIASE	NP_000792;NP_001186715;NP_463460	5	16	3.0965	6	13	2.659	5	13	2.5365	2.764	0.294396	1	1	1.2404	2	6	1.2987	2	6	1.3222	1.2871	0.0421157	0.465666
7388	UQCRH	ubiquinol-cytochrome c reductase hinge protein	QCR6|UQCR8	NP_001284494;NP_001284495;NP_005995	3	4	0.9422	3	3	0.7929	5	5	1.1124	0.949167	0.159864	0	0	0.6891	0	0	0.2239	1	1	0.4103	0.4411	0.234124	0.464723
59286	UBL5	ubiquitin like 5	HUB1	NP_001041706;NP_077268	4	8	1.6602	4	8	1.7259	5	9	1.8244	1.73683	0.0826442	1	1	1.2404	1	1	0.403	3	3	0.775	0.806133	0.419567	0.46414
9553	MRPL33	mitochondrial ribosomal protein L33	C2orf1|L33mt|MRP-L33|RPL33L	NP_004882;NP_663303	3	4	0.9422	3	4	0.9795	3	4	0.9344	0.952033	0.0241044	0	0	0.6891	1	1	0.403	0	0	0.2279	0.44	0.232816	0.462169
80774	LIMD2	LIM domain containing 2	-	NP_085053	3	5	1.1217	4	4	0.9795	3	3	0.7564	0.952533	0.184137	0	0	0.6891	1	1	0.403	0	0	0.2279	0.44	0.232816	0.461926
142940	TRUB1	TruB pseudouridine (psi) synthase family member 1	PUS4	NP_631908	5	5	1.1217	8	10	2.0991	9	10	2.0024	1.74107	0.538562	0	0	0.6891	4	4	0.9404	3	3	0.775	0.8015	0.127729	0.46035
9169	SCAF11	SR-related CTD-associated factor 11	CASP11|SFRS2IP|SIP1|SRRP129|SRSF2IP	NP_004710	8	9	1.8397	12	12	2.4723	4	4	0.9344	1.7488	0.772969	1	1	1.2404	2	2	0.5821	2	2	0.5926	0.805033	0.377075	0.460335
4130	MAP1A	microtubule associated protein 1A	MAP1L|MTAP1A	NP_002364	69	88	16.0418	74	94	17.8002	48	52	9.4853	14.4424	4.38211	1	1	1.2404	32	37	6.8554	53	63	11.7292	6.60833	5.24876	0.457564
6949	TCOF1	Treacher Collins-Franceschetti syndrome 1	MFD1|TCS|TCS1|treacle	NP_000347;NP_001008657;NP_001128715;NP_001128716;NP_001128717;NP_001182070	42	56	10.2842	36	67	12.748	18	22	4.1392	9.05713	4.43364	3	5	3.4462	29	36	6.676	11	11	2.2342	4.1188	2.29602	0.454758
27032	ATP2C1	ATPase, Ca++ transporting, type 2C, member 1	ATP2C1A|BCPM|HHD|PMR1|SPCA1|hSPCA1	NP_001001485;NP_001001486;NP_001001487;NP_001186108;NP_001186109;NP_001186110;NP_001186111;NP_001186112;NP_001186113;NP_001186114;NP_055197	2	2	0.5833	6	6	1.3526	2	2	0.5784	0.8381	0.445577	0	0	0.6891	0	0	0.2239	0	0	0.2279	0.3803	0.267436	0.453764
25874	MPC2	mitochondrial pyruvate carrier 2	BRP44	NP_001137146;NP_056230	4	8	1.6602	4	6	1.3526	4	5	1.1124	1.37507	0.27459	0	0	0.6891	3	3	0.7612	1	1	0.4103	0.6202	0.185319	0.451033
26509	MYOF	myoferlin	FER1L3	NP_038479;NP_579899	13	13	2.5579	13	13	2.659	4	4	0.9344	2.05043	0.967834	0	0	0.6891	6	6	1.2987	3	3	0.775	0.920933	0.329963	0.449141
4724	NDUFS4	NADH:ubiquinone oxidoreductase subunit S4	AQDQ|CI-18|CI-18 kDa|CI-AQDQ	NP_001304980;NP_002486	6	9	1.8397	2	2	0.6063	4	4	0.9344	1.1268	0.638813	0	0	0.6891	0	0	0.2239	2	2	0.5926	0.501867	0.245514	0.445391
667	DST	dystonin	BP240|BPA|BPAG1|CATX-15|CATX15|D6S1101|DMH|DT|EBSB2|HSAN6|MACF2	NP_001138241;NP_001138242;NP_001714;NP_056363;NP_899236	80	82	14.9618	78	82	15.5541	21	21	3.9611	11.4923	6.52896	1	1	1.2404	12	12	2.3737	61	63	11.7292	5.11443	5.75651	0.44503
143244	EIF5AL1	eukaryotic translation initiation factor 5A-like 1	EIF5AP1|bA342M3.3	NP_001093162	9	24	4.5332	9	25	4.8992	11	22	4.1392	4.52387	0.380086	0	0	0.6891	8	11	2.1945	8	16	3.1464	2.01	1.239	0.44431
84726	PRRC2B	proline rich coiled-coil 2B	BAT2L|BAT2L1|KIAA0515|LQFBS-1	NP_037450	16	16	3.0965	18	18	3.5923	16	17	3.2488	3.31253	0.25397	1	1	1.2404	12	12	2.3737	3	3	0.775	1.46303	0.822274	0.441666
56648	EIF5A2	eukaryotic translation initiation factor 5A2	EIF-5A2|eIF5AII	NP_065123	9	23	4.3536	9	25	4.8992	8	19	3.605	4.28593	0.649748	1	1	1.2404	7	10	2.0153	6	12	2.4166	1.89077	0.597907	0.441156
55505	NOP10	NOP10 ribonucleoprotein	DKCB1|NOLA3|NOP10P	NP_061118	5	11	2.1988	4	4	0.9795	4	7	1.4684	1.5489	0.613623	0	0	0.6891	2	2	0.5821	2	3	0.775	0.682067	0.0966421	0.440356
84844	PHF5A	PHD finger protein 5A	INI|Rds3|SAP14b|SF3B7|SF3b14b|bK223H9.2	NP_116147	5	6	1.3012	7	7	1.5392	2	2	0.5784	1.1396	0.50037	0	0	0.6891	1	1	0.403	1	1	0.4103	0.5008	0.163113	0.439452
23041	MON2	MON2 homolog, regulator of endosome-to-Golgi trafficking	-	NP_001265398;NP_001265399;NP_001265400;NP_001265401;NP_055841	11	11	2.1988	13	13	2.659	5	5	1.1124	1.99007	0.794147	1	1	1.2404	2	2	0.5821	3	3	0.775	0.865833	0.338419	0.435078
8411	EEA1	early endosome antigen 1	MST105|MSTP105|ZFYVE2	NP_003557	25	25	4.7129	26	28	5.4595	8	8	1.6464	3.9396	2.02075	3	3	2.3432	8	8	1.657	5	5	1.1398	1.71333	0.603675	0.4349
201626	PDE12	phosphodiesterase 12	2'-PDE	NP_001309105;NP_001309106;NP_808881	2	3	0.7627	6	6	1.3526	10	11	2.1805	1.43193	0.712222	0	0	0.6891	3	3	0.7612	1	1	0.4103	0.6202	0.185319	0.433121
3698	ITIH2	inter-alpha-trypsin inhibitor heavy chain 2	H2P|SHAP	NP_002207	2	2	0.5833	2	2	0.6063	7	14	2.7146	1.3014	1.22392	0	0	0.6891	1	1	0.403	2	2	0.5926	0.561567	0.145553	0.43151
5184	PEPD	peptidase D	PROLIDASE	NP_000276;NP_001159528;NP_001159529	10	15	2.917	14	14	2.8456	14	24	4.4955	3.41937	0.932642	1	1	1.2404	6	6	1.2987	8	9	1.8694	1.4695	0.347548	0.429758
25828	TXN2	thioredoxin 2	MT-TRX|MTRX|TRX2	NP_036605	5	9	1.8397	6	6	1.3526	7	8	1.6464	1.6129	0.245272	0	0	0.6891	5	5	1.1195	0	0	0.2279	0.678833	0.445889	0.420878
2286	FKBP2	FK506 binding protein 2	FKBP-13|PPIase	NP_001128680;NP_004461;NP_476433	4	7	1.4807	5	9	1.9125	6	12	2.3585	1.91723	0.438919	0	0	0.6891	3	4	0.9404	3	3	0.775	0.8015	0.127729	0.41805
6921	TCEB1	transcription elongation factor B (SIII), polypeptide 1 (15kDa, elongin C)	SIII|eloC	NP_001191786;NP_001191787;NP_001191788;NP_001191789;NP_001191790;NP_001191791;NP_001191792;NP_001191793;NP_005639	6	18	3.4557	7	10	2.0991	5	8	1.6464	2.4004	0.94153	0	0	0.6891	4	5	1.1195	4	5	1.1398	0.9828	0.254554	0.409432
10142	AKAP9	A-kinase anchoring protein 9	AKAP-9|AKAP350|AKAP450|CG-NAP|HYPERION|LQT11|MU-RMS-40.16A|PPP1R45|PRKA9|YOTIAO	NP_005742;NP_671714	40	40	7.4079	46	46	8.8221	5	5	1.1124	5.7808	4.10432	1	1	1.2404	1	1	0.403	27	28	5.3363	2.32657	2.63992	0.402464
10289	EIF1B	eukaryotic translation initiation factor 1B	GC20	NP_005866	4	9	1.8397	8	13	2.659	6	7	1.4684	1.98903	0.609186	0	0	0.6891	3	5	1.1195	2	2	0.5926	0.8004	0.280529	0.402407
5930	RBBP6	retinoblastoma binding protein 6	MY038|P2P-R|PACT|RBQ-1|SNAMA	NP_008841;NP_061173;NP_116015	16	16	3.0965	14	15	3.0323	3	3	0.7564	2.29507	1.33291	1	1	1.2404	5	5	1.1195	1	1	0.4103	0.9234	0.448451	0.402341
54832	VPS13C	vacuolar protein sorting 13 homolog C (S. cerevisiae)	-	NP_001018098;NP_060154;NP_060550;NP_065872	35	36	6.6891	38	42	8.0746	10	11	2.1805	5.64807	3.08187	0	0	0.6891	7	7	1.4778	24	24	4.6063	2.25773	2.0718	0.399736
8925	HERC1	HECT and RLD domain containing E3 ubiquitin protein ligase family member 1	p532|p619	NP_003913	11	11	2.1988	9	9	1.9125	2	2	0.5784	1.56323	0.86482	0	0	0.6891	0	0	0.2239	4	4	0.9574	0.623467	0.371128	0.398831
23469	PHF3	PHD finger protein 3	-	NP_001277188;NP_001277189;NP_055968	8	8	1.6602	8	8	1.7259	10	11	2.1805	1.85553	0.28334	0	0	0.6891	5	5	1.1195	1	1	0.4103	0.739633	0.35729	0.39861
4035	LRP1	LDL receptor related protein 1	A2MR|APOER|APR|CD91|IGFBP3R|LRP|LRP1A|TGFBR5	NP_002323	6	6	1.3012	9	9	1.9125	2	2	0.5784	1.26403	0.667826	0	0	0.6891	0	0	0.2239	2	2	0.5926	0.501867	0.245514	0.397036
4259	MGST3	microsomal glutathione S-transferase 3	GST-III	NP_004519	5	14	2.7374	7	10	2.0991	6	19	3.605	2.81383	0.755854	1	1	1.2404	4	6	1.2987	2	3	0.775	1.1047	0.287013	0.392596
6168	RPL37A	ribosomal protein L37a	L37A	NP_000989	6	10	2.0193	6	13	2.659	6	7	1.4684	2.0489	0.595852	0	0	0.6891	3	3	0.7612	4	4	0.9574	0.802567	0.138851	0.391706
10209	EIF1	eukaryotic translation initiation factor 1	A121|EIF-1|EIF1A|ISO1|SUI1	NP_005792	7	12	2.3783	10	15	3.0323	9	11	2.1805	2.53037	0.445796	0	0	0.6891	5	7	1.4778	3	3	0.775	0.980633	0.432696	0.387546
2638	GC	group-specific component (vitamin D binding protein)	DBP|DBP/GC|GRD3|Gc-MAF|GcMAF|HEL-S-51|VDBG|VDBP	NP_000574;NP_001191235;NP_001191236	3	7	1.4807	5	8	1.7259	6	13	2.5365	1.91437	0.552556	0	0	0.6891	4	4	0.9404	1	2	0.5926	0.7407	0.17955	0.386916
2	A2M	alpha-2-macroglobulin	A2MD|CPAMD5|FWP007|S863-7	NP_000005	4	8	1.6602	4	6	1.3526	6	9	1.8244	1.6124	0.239505	0	0	0.6891	3	3	0.7612	1	1	0.4103	0.6202	0.185319	0.384644
55847	CISD1	CDGSH iron sulfur domain 1	C10orf70|MDS029|ZCD1|mitoNEET	NP_060934	5	12	2.3783	5	12	2.4723	5	12	2.3585	2.40303	0.0607981	0	0	0.6891	2	3	0.7612	3	6	1.3222	0.924167	0.346587	0.384583
23077	MYCBP2	MYC binding protein 2, E3 ubiquitin protein ligase	PAM	NP_055872	19	19	3.6352	21	21	4.1524	1	1	0.4004	2.72933	2.03343	1	1	1.2404	2	2	0.5821	6	6	1.3222	1.04823	0.40575	0.384062
394	ARHGAP5	Rho GTPase activating protein 5	GFI2|RhoGAP5|p190-B|p190BRhoGAP	NP_001025226;NP_001164	7	7	1.4807	10	10	2.0991	2	2	0.5784	1.38607	0.764754	0	0	0.6891	2	2	0.5821	0	0	0.2279	0.4997	0.241389	0.360517
463	ZFHX3	zinc finger homeobox 3	ATBF1|ATBT|ZNF927	NP_001158238;NP_008816	14	14	2.7374	10	10	2.0991	4	4	0.9344	1.92363	0.914218	0	0	0.6891	0	0	0.2239	5	5	1.1398	0.684267	0.457969	0.355716
2312	FLG	filaggrin	ATOD2	NP_002007	8	12	2.3783	2	2	0.6063	1	1	0.4004	1.12833	1.08739	0	0	0.6891	0	0	0.2239	0	0	0.2279	0.3803	0.267436	0.337046
448834	KPRP	keratinocyte proline rich protein	C1orf45	NP_001020402	9	13	2.5579	4	4	0.9795	4	4	0.9344	1.4906	0.924584	0	0	0.6891	0	0	0.2239	2	2	0.5926	0.501867	0.245514	0.336688
23131	GPATCH8	G-patch domain containing 8	GPATC8|KIAA0553	NP_001002909;NP_001291868;NP_001291869;NP_001291870;NP_001291871;NP_001291872	18	19	3.6352	2	2	0.6063	1	1	0.4004	1.5473	1.8111	0	0	0.6891	2	2	0.5821	0	0	0.2279	0.4997	0.241389	0.32295
2804	GOLGB1	golgin B1	GCP|GCP372|GOLIM1	NP_001243415;NP_001243416;NP_001243417;NP_004478	63	64	11.723	56	58	11.0651	19	19	3.605	8.7977	4.50903	1	2	1.7917	5	5	1.1195	29	29	5.5189	2.81003	2.3699	0.319405
11034	DSTN	destrin (actin depolymerizing factor)	ACTDP|ADF|HEL32|bA462D18.2	NP_001011546;NP_006861	17	23	4.3536	15	24	4.7125	12	17	3.2488	4.10497	0.762868	2	2	1.7917	2	2	0.5821	6	6	1.3222	1.232	0.609824	0.300124
9857	CEP350	centrosomal protein 350kDa	CAP350|GM133	NP_055625	16	17	3.2761	15	16	3.219	1	1	0.4004	2.2985	1.64405	0	0	0.6891	1	1	0.403	4	4	0.9574	0.683167	0.277248	0.297223
4257	MGST1	microsomal glutathione S-transferase 1	GST12|MGST|MGST-I	NP_001247440;NP_001247441;NP_001254527;NP_064696;NP_665707;NP_665734;NP_665735	4	7	1.4807	5	10	2.0991	4	7	1.4684	1.68273	0.360637	0	0	0.6891	2	2	0.5821	0	0	0.2279	0.4997	0.241389	0.296957
23013	SPEN	spen family transcriptional repressor	HIAA0929|MINT|RBM15C|SHARP	NP_055816	45	47	8.6661	47	53	10.1304	16	16	3.0707	7.28907	3.72586	0	0	0.6891	4	4	0.9404	23	24	4.6063	2.0786	2.19266	0.285167
3933	LCN1	lipocalin 1	PMFA|TLC|TP|VEGP	NP_001239546;NP_001239547;NP_001239548;NP_002288	7	19	3.6352	0	0	0.2332	0	0	0.2225	1.36363	1.96724	0	0	0.6891	0	0	0.2239	0	0	0.2279	0.3803	0.267436	0.278887
2879	GPX4	glutathione peroxidase 4	GPx-4|GSHPx-4|MCSP|PHGPx|snGPx|snPHGPx	NP_001034936;NP_001034937;NP_002076	6	6	1.3012	6	7	1.5392	6	6	1.2904	1.37693	0.140631	0	0	0.6891	0	0	0.2239	0	0	0.2279	0.3803	0.267436	0.276193
8085	KMT2D	lysine (K)-specific methyltransferase 2D	AAD10|ALR|CAGL114|KABUK1|KMS|MLL2|MLL4|TNRC21	NP_003473	21	21	3.9944	12	12	2.4723	8	8	1.6464	2.70437	1.19108	0	0	0.6891	0	0	0.2239	4	4	0.9574	0.623467	0.371128	0.230541
4069	LYZ	lysozyme	LZM	NP_000230	9	40	7.4079	1	1	0.4197	0	0	0.2225	2.68337	4.09275	0	0	0.6891	1	1	0.403	0	0	0.2279	0.44	0.232816	0.163973

## Sheet: Untreated vs MEV treated 48 h
					Untreated Rep 1			Untreated Rep 2			Untreated Rep 3			Untreated	Untreated	Treated - 48 h Rep 1			Treated - 48 h Rep 2			Treated - 48 h Rep 3			Treated - 48 h	Treated - 48 h	48 h/UT
Entrez ID	Gene Symbol	Gene Desc	Alternate names	Refseq	No. of peptides	No. of spectra	NSpC	No. of peptides	No. of spectra	NSpC	No. of peptides	No. of spectra	NSpC	Average NspC	SD	No. of peptides	No. of spectra	NSpC	No. of peptides	No. of spectra	NSpC	No. of peptides	No. of spectra	NSpC	Average NspC	SD	FOLD
5284	PIGR	polymeric immunoglobulin receptor	-	NP_002635	0	0	0.2243	0	0	0.2332	0	0	0.2225	0.226667	0.00572917	0	0	0.4343	14	20	4.2109	0	0	0.2317	1.62563	2.2412	7.17191
51592	TRIM33	tripartite motif containing 33	ECTO|PTC7|RFG7|TF1G|TIF1G|TIF1GAMMA|TIFGAMMA	NP_056990;NP_148980	0	0	0.2243	0	0	0.2332	0	0	0.2225	0.226667	0.00572917	4	6	2.5196	2	4	1.04	1	1	0.4172	1.3256	1.07991	5.84824
92747	BPIFB1	BPI fold containing family B member 1	C20orf114|LPLUNC1	NP_149974	0	0	0.2243	0	0	0.2332	0	0	0.2225	0.226667	0.00572917	0	0	0.4343	11	14	3.0216	0	0	0.2317	1.2292	1.55557	5.42294
1755	DMBT1	deleted in malignant brain tumors 1	GP340|muclin	NP_001307573;NP_004397;NP_015568;NP_060049	0	0	0.2243	0	0	0.2332	0	0	0.2225	0.226667	0.00572917	0	0	0.4343	13	14	3.0216	0	0	0.2317	1.2292	1.55557	5.42294
727897	MUC5B	mucin 5B, oligomeric mucus/gel-forming	MG1|MUC-5B|MUC5|MUC9	NP_002449	0	0	0.2243	0	0	0.2332	0	0	0.2225	0.226667	0.00572917	0	0	0.4343	12	13	2.8234	0	0	0.2317	1.16313	1.4414	5.13147
5255	PHKA1	phosphorylase kinase, alpha 1 (muscle)	PHKA	NP_001116142;NP_001165907;NP_002628	0	0	0.2243	0	0	0.2332	0	0	0.2225	0.226667	0.00572917	6	6	2.5196	1	1	0.4457	1	1	0.4172	1.1275	1.20568	4.97426
388015	RTL1	retrotransposon-like 1	MART1|Mar1|PEG11	NP_001128360	2	2	0.5833	0	0	0.2332	0	0	0.2225	0.346333	0.205289	8	10	3.9102	0	0	0.2476	0	0	0.2317	1.46317	2.11921	4.22474
91056	AP5B1	adaptor related protein complex 5, beta 1 subunit	AP-5|PP1030	NP_612377	0	0	0.2243	0	0	0.2332	0	0	0.2225	0.226667	0.00572917	2	5	2.172	1	1	0.4457	0	0	0.2317	0.9498	1.06385	4.19029
55813	UTP6	UTP6 small subunit processome component	C17orf40|HCA66	NP_060898	0	0	0.2243	0	0	0.2332	1	1	0.4004	0.285967	0.099202	4	5	2.172	3	3	0.8419	1	1	0.4172	1.1437	0.915502	3.99942
114793	FMNL2	formin like 2	FHOD2	NP_443137	0	0	0.2243	0	0	0.2332	0	0	0.2225	0.226667	0.00572917	4	4	1.8244	2	2	0.6438	0	0	0.2317	0.899967	0.826674	3.97044
2444	FRK	fyn-related Src family tyrosine kinase	GTK|PTK5|RAK	NP_002022	0	0	0.2243	0	0	0.2332	0	0	0.2225	0.226667	0.00572917	3	3	1.4768	1	1	0.4457	2	2	0.6026	0.8417	0.555579	3.71338
5558	PRIM2	primase, DNA, polypeptide 2 (58kDa)	PRIM2A|p58	NP_000938;NP_001269416;NP_001269417	1	1	0.4038	0	0	0.2332	0	0	0.2225	0.2865	0.101726	4	4	1.8244	2	2	0.6438	2	2	0.6026	1.0236	0.693819	3.57277
64421	DCLRE1C	DNA cross-link repair 1C	A-SCID|DCLREC1C|RS-SCID|SCIDA|SNM1C	NP_001029027;NP_001029029;NP_001029030;NP_001276005;NP_001276006;NP_001276007;NP_001276008;NP_071932	0	0	0.2243	0	0	0.2332	0	0	0.2225	0.226667	0.00572917	1	2	1.1293	2	2	0.6438	2	2	0.6026	0.7919	0.292922	3.49368
3151	HMGN2	high mobility group nucleosomal binding domain 2	HMG17	NP_005508	0	0	0.2243	4	4	0.9795	0	0	0.2225	0.475433	0.436535	1	1	0.7818	8	13	2.8234	4	6	1.3443	1.64983	1.05454	3.47017
92105	INTS4	integrator complex subunit 4	INT4|MST093	NP_291025	0	0	0.2243	0	0	0.2332	0	0	0.2225	0.226667	0.00572917	3	3	1.4768	2	2	0.6438	0	0	0.2317	0.7841	0.634296	3.45926
7837	PXDN	peroxidasin	COPOA|D2S448|D2S448E|MG50|PRG2|PXN|VPO	NP_036425	0	0	0.2243	1	1	0.4197	0	0	0.2225	0.288833	0.113337	3	3	1.4768	5	5	1.2381	0	0	0.2317	0.9822	0.660819	3.40058
55139	ANKZF1	ankyrin repeat and zinc finger domain containing 1	ZNF744	NP_001035869;NP_001269721;NP_060559	0	0	0.2243	0	0	0.2332	0	0	0.2225	0.226667	0.00572917	4	4	1.8244	0	0	0.2476	0	0	0.2317	0.7679	0.91499	3.38779
81928	CABLES2	Cdk5 and Abl enzyme substrate 2	C20orf150|dJ908M14.2|ik3-2	NP_112492	0	0	0.2243	0	0	0.2332	0	0	0.2225	0.226667	0.00572917	1	4	1.8244	0	0	0.2476	0	0	0.2317	0.7679	0.91499	3.38779
56896	DPYSL5	dihydropyrimidinase like 5	CRAM|CRMP-5|CRMP5|Ulip6	NP_001240652;NP_001240653;NP_064519	0	0	0.2243	0	0	0.2332	0	0	0.2225	0.226667	0.00572917	4	4	1.8244	0	0	0.2476	0	0	0.2317	0.7679	0.91499	3.38779
7425	VGF	VGF nerve growth factor inducible	SCG7|SgVII	NP_003369	0	0	0.2243	0	0	0.2332	0	0	0.2225	0.226667	0.00572917	4	4	1.8244	0	0	0.2476	0	0	0.2317	0.7679	0.91499	3.38779
23061	TBC1D9B	TBC1 domain family member 9B	-	NP_055858;NP_942568	0	0	0.2243	1	1	0.4197	1	1	0.4004	0.348133	0.107676	4	4	1.8244	6	6	1.4363	0	0	0.2317	1.16413	0.830499	3.34393
57647	DHX37	DEAH-box helicase 37	DDX37	NP_116045	2	2	0.5833	1	1	0.4197	1	1	0.4004	0.4678	0.10049	8	8	3.2148	5	5	1.2381	0	0	0.2317	1.56153	1.51762	3.33804
64062	RBM26	RNA binding motif protein 26	ARRS2|C13orf10|PPP1R132|PRO1777|SE70-2|ZC3H17	NP_001273560;NP_001273561;NP_071401	3	3	0.7627	0	0	0.2332	3	3	0.7564	0.5841	0.303905	8	8	3.2148	9	9	2.0307	2	2	0.6026	1.94937	1.308	3.33739
5096	PCCB	propionyl-CoA carboxylase beta subunit	-	NP_000523;NP_001171485	0	0	0.2243	0	0	0.2332	0	0	0.2225	0.226667	0.00572917	1	1	0.7818	3	3	0.8419	2	2	0.6026	0.7421	0.124492	3.27397
65244	SPATS2	spermatogenesis associated, serine rich 2	Nbla00526|P59SCR|SCR59|SPATA10	NP_001280214;NP_001280215;NP_075559	1	1	0.4038	1	1	0.4197	0	0	0.2225	0.348667	0.109552	4	5	2.172	2	2	0.6438	2	2	0.6026	1.13947	0.894437	3.26807
11128	POLR3A	polymerase (RNA) III (DNA directed) polypeptide A, 155kDa	ADDH|HLD7|RPC1|RPC155|hRPC155	NP_008986	4	4	0.9422	0	0	0.2332	0	0	0.2225	0.465967	0.412465	7	7	2.8672	5	5	1.2381	1	1	0.4172	1.5075	1.24702	3.23521
83479	DDX59	DEAD-box helicase 59	OFD5|ZNHIT5	NP_001026895;NP_001307110;NP_001307111	1	1	0.4038	0	0	0.2332	1	1	0.4004	0.3458	0.0975293	2	2	1.1293	4	5	1.2381	4	4	0.9734	1.1136	0.133047	3.22036
22978	NT5C2	5'-nucleotidase, cytosolic II	GMP|NT5B|PNT5|SPG45|SPG65|cN-II	NP_001127845;NP_036361	1	1	0.4038	0	0	0.2332	2	2	0.5784	0.405133	0.172604	2	2	1.1293	6	6	1.4363	6	6	1.3443	1.3033	0.157553	3.21697
4646	MYO6	myosin VI	DFNA22|DFNB37	NP_001287828;NP_004990	0	0	0.2243	0	0	0.2332	3	3	0.7564	0.404633	0.304671	4	4	1.8244	7	7	1.6344	1	1	0.4172	1.292	0.763532	3.19301
23094	SIPA1L3	signal-induced proliferation-associated 1 like 3	SPAL3	NP_055888	0	0	0.2243	0	0	0.2332	0	0	0.2225	0.226667	0.00572917	3	3	1.4768	0	0	0.2476	1	1	0.4172	0.713867	0.666139	3.14941
90411	MCFD2	multiple coagulation factor deficiency 2	F5F8D|F5F8D2|LMAN1IP|SDNSF	NP_001164977;NP_001164978;NP_001164979;NP_001164980;NP_001164981;NP_001164982;NP_644808	0	0	0.2243	0	0	0.2332	0	0	0.2225	0.226667	0.00572917	0	0	0.4343	2	3	0.8419	3	3	0.788	0.688067	0.221415	3.03559
27445	PCLO	piccolo presynaptic cytomatrix protein	ACZ|PCH3	NP_055325;NP_149015	0	0	0.2243	0	0	0.2332	0	0	0.2225	0.226667	0.00572917	0	0	0.4343	3	3	0.8419	3	3	0.788	0.688067	0.221415	3.03559
8736	MYOM1	myomesin 1	SKELEMIN	NP_003794;NP_062830	0	0	0.2243	0	0	0.2332	0	0	0.2225	0.226667	0.00572917	1	1	0.7818	2	4	1.04	0	0	0.2317	0.6845	0.412841	3.01985
23187	PHLDB1	pleckstrin homology-like domain, family B, member 1	LL5A	NP_001138230;NP_001138231;NP_055972	1	1	0.4038	0	0	0.2332	0	0	0.2225	0.2865	0.101726	2	2	1.1293	4	4	1.04	1	1	0.4172	0.862167	0.387931	3.00931
2132	EXT2	exostosin glycosyltransferase 2	SOTV|SSMS	NP_000392;NP_001171554;NP_997005	0	0	0.2243	0	0	0.2332	0	0	0.2225	0.226667	0.00572917	1	1	0.7818	1	2	0.6438	2	2	0.6026	0.676067	0.0938563	2.98265
55275	VPS53	VPS53 GARP complex subunit	HCCS1|PCH2E|hVps53L|pp13624	NP_001121631;NP_060759	0	0	0.2243	0	0	0.2332	0	0	0.2225	0.226667	0.00572917	1	1	0.7818	1	2	0.6438	1	2	0.6026	0.676067	0.0938563	2.98265
4907	NT5E	5'-nucleotidase ecto	CALJA|CD73|E5NT|NT|NT5|NTE|eN|eNT	NP_001191742;NP_002517	0	0	0.2243	0	0	0.2332	0	0	0.2225	0.226667	0.00572917	0	0	0.4343	0	0	0.2476	6	6	1.3443	0.6754	0.586758	2.97971
143684	FAM76B	family with sequence similarity 76 member B	-	NP_653265	0	0	0.2243	0	0	0.2332	2	2	0.5784	0.3453	0.20192	4	4	1.8244	1	1	0.4457	3	3	0.788	1.01937	0.71788	2.95212
148741	ANKRD35	ankyrin repeat domain 35	-	NP_001267728;NP_653299	0	0	0.2243	0	0	0.2332	0	0	0.2225	0.226667	0.00572917	2	2	1.1293	2	2	0.6438	0	0	0.2317	0.668267	0.4493	2.94824
6502	SKP2	S-phase kinase-associated protein 2, E3 ubiquitin protein ligase	FBL1|FBXL1|FLB1|p45	NP_001230049;NP_005974;NP_116026	0	0	0.2243	0	0	0.2332	0	0	0.2225	0.226667	0.00572917	2	2	1.1293	2	2	0.6438	0	0	0.2317	0.668267	0.4493	2.94824
7770	ZNF227	zinc finger protein 227	-	NP_001276095;NP_001276096;NP_001276097;NP_001276098;NP_001276099;NP_001276100;NP_001276101;NP_001276102;NP_872296	0	0	0.2243	0	0	0.2332	0	0	0.2225	0.226667	0.00572917	1	2	1.1293	1	2	0.6438	0	0	0.2317	0.668267	0.4493	2.94824
29763	PACSIN3	protein kinase C and casein kinase substrate in neurons 3	SDPIII	NP_001171903;NP_001171904;NP_057307	0	0	0.2243	1	1	0.4197	1	1	0.4004	0.348133	0.107676	4	4	1.8244	2	2	0.6438	2	2	0.6026	1.0236	0.693819	2.94025
28952	CCDC22	coiled-coil domain containing 22	CXorf37|JM1	NP_054727	0	0	0.2243	0	0	0.2332	0	0	0.2225	0.226667	0.00572917	2	2	1.1293	1	1	0.4457	1	1	0.4172	0.664067	0.403156	2.92971
5796	PTPRK	protein tyrosine phosphatase, receptor type K	R-PTP-kappa	NP_001129120;NP_001278910;NP_001278911;NP_001278912;NP_001278913;NP_002835	0	0	0.2243	0	0	0.2332	0	0	0.2225	0.226667	0.00572917	2	2	1.1293	1	1	0.4457	1	1	0.4172	0.664067	0.403156	2.92971
85462	FHDC1	FH2 domain containing 1	-	NP_203751	0	0	0.2243	0	0	0.2332	1	1	0.4004	0.285967	0.099202	4	4	1.8244	0	0	0.2476	1	1	0.4172	0.829733	0.865571	2.9015
196441	ZFC3H1	zinc finger, C3H1-type containing	CCDC131|PSRC2	NP_659419	0	0	0.2243	0	0	0.2332	1	1	0.4004	0.285967	0.099202	4	4	1.8244	0	0	0.2476	1	1	0.4172	0.829733	0.865571	2.9015
84059	ADGRV1	adhesion G protein-coupled receptor V1	FEB4|GPR98|MASS1|USH2B|USH2C|VLGR1|VLGR1b	NP_115495	0	0	0.2243	0	0	0.2332	0	0	0.2225	0.226667	0.00572917	3	3	1.4768	0	0	0.2476	0	0	0.2317	0.652033	0.714313	2.87662
779	CACNA1S	calcium channel, voltage-dependent, L type, alpha 1S subunit	CACNL1A3|CCHL1A3|Cav1.1|HOKPP|HOKPP1|MHS5|TTPP1|hypoPP	NP_000060	0	0	0.2243	0	0	0.2332	0	0	0.2225	0.226667	0.00572917	3	3	1.4768	0	0	0.2476	0	0	0.2317	0.652033	0.714313	2.87662
8326	FZD9	frizzled class receptor 9	CD349|FZD3	NP_003499	0	0	0.2243	0	0	0.2332	0	0	0.2225	0.226667	0.00572917	3	3	1.4768	0	0	0.2476	0	0	0.2317	0.652033	0.714313	2.87662
222194	RSBN1L	round spermatid basic protein 1-like	-	NP_940869	0	0	0.2243	0	0	0.2332	0	0	0.2225	0.226667	0.00572917	2	3	1.4768	0	0	0.2476	0	0	0.2317	0.652033	0.714313	2.87662
124739	USP43	ubiquitin specific peptidase 43	-	NP_001254505;NP_694942	0	0	0.2243	0	0	0.2332	0	0	0.2225	0.226667	0.00572917	3	3	1.4768	0	0	0.2476	0	0	0.2317	0.652033	0.714313	2.87662
114984	FLYWCH2	FLYWCH family member 2	-	NP_001135971;NP_001135972;NP_612448	0	0	0.2243	0	0	0.2332	2	2	0.5784	0.3453	0.20192	2	2	1.1293	4	5	1.2381	2	2	0.6026	0.99	0.33988	2.86707
3150	HMGN1	high mobility group nucleosome binding domain 1	HMG14	NP_004956	1	1	0.4038	0	0	0.2332	1	1	0.4004	0.3458	0.0975293	2	3	1.4768	2	2	0.6438	3	3	0.788	0.969533	0.445183	2.80374
100423062	IGLL5	immunoglobulin lambda like polypeptide 5	IGL|IGLV|VL-MAR	NP_001171597;NP_001243225	0	0	0.2243	0	0	0.2332	0	0	0.2225	0.226667	0.00572917	0	0	0.4343	5	5	1.2381	0	0	0.2317	0.6347	0.532288	2.80015
124220	ZG16B	zymogen granule protein 16B	EECP|HRPE773|JCLN2|PAUF|PRO1567	NP_660295	0	0	0.2243	0	0	0.2332	0	0	0.2225	0.226667	0.00572917	0	0	0.4343	4	5	1.2381	0	0	0.2317	0.6347	0.532288	2.80015
57572	DOCK6	dedicator of cytokinesis 6	AOS2|ZIR1	NP_065863	1	1	0.4038	1	1	0.4197	0	0	0.2225	0.348667	0.109552	3	3	1.4768	3	3	0.8419	2	2	0.6026	0.973767	0.451772	2.79283
55421	NCBP3	nuclear cap binding subunit 3	C17orf85|ELG|HSA277841	NP_001107590	1	1	0.4038	0	0	0.2332	0	0	0.2225	0.2865	0.101726	2	2	1.1293	3	3	0.8419	1	1	0.4172	0.796133	0.358249	2.77882
23325	KIAA1033	KIAA1033	MRT43|SWIP	NP_001280569;NP_056090	0	0	0.2243	0	0	0.2332	4	4	0.9344	0.463967	0.407432	4	4	1.8244	6	6	1.4363	2	2	0.6026	1.28777	0.624296	2.77556
4684	NCAM1	neural cell adhesion molecule 1	CD56|MSK39|NCAM	NP_000606;NP_001070150;NP_001229536;NP_001229537;NP_851996	2	2	0.5833	2	2	0.6063	1	1	0.4004	0.53	0.112825	6	6	2.5196	5	6	1.4363	1	1	0.4172	1.4577	1.05136	2.75038
80305	TRABD	TraB domain containing	LP6054|PP2447	NP_001307413;NP_001307414;NP_001307416;NP_001307417;NP_079480	1	1	0.4038	0	0	0.2332	0	0	0.2225	0.2865	0.101726	2	2	1.1293	1	1	0.4457	3	3	0.788	0.787667	0.3418	2.74927
1659	DHX8	DEAH-box helicase 8	DDX8|HRH1|PRP22|PRPF22	NP_001289552;NP_001309145;NP_001309146;NP_001309147;NP_001309148;NP_001309149;NP_001309150;NP_004932	1	1	0.4038	0	0	0.2332	2	3	0.7564	0.464467	0.266824	3	5	2.172	5	5	1.2381	1	1	0.4172	1.27577	0.878006	2.74673
8974	P4HA2	prolyl 4-hydroxylase, alpha polypeptide II	-	NP_001017973;NP_001017974;NP_001136070;NP_001136071;NP_004190	0	0	0.2243	0	0	0.2332	0	0	0.2225	0.226667	0.00572917	0	0	0.4343	2	2	0.6438	3	3	0.788	0.622033	0.177852	2.74426
253260	RICTOR	RPTOR independent companion of MTOR, complex 2	AVO3|PIA|hAVO3	NP_001272368;NP_001272369;NP_689969	0	0	0.2243	1	1	0.4197	0	0	0.2225	0.288833	0.113337	1	2	1.1293	2	2	0.6438	2	2	0.6026	0.7919	0.292922	2.74172
7678	ZNF124	zinc finger protein 124	HZF-16|HZF16|ZK7	NP_001230669;NP_001284496;NP_001284497;NP_001284498;NP_003422	0	0	0.2243	0	0	0.2332	0	0	0.2225	0.226667	0.00572917	1	1	0.7818	2	3	0.8419	0	0	0.2317	0.618467	0.336295	2.72853
197407	ZNF48	zinc finger protein 48	ZNF553	NP_001201835;NP_001201836;NP_001201838;NP_001311423;NP_689865	0	0	0.2243	0	0	0.2332	0	0	0.2225	0.226667	0.00572917	1	1	0.7818	2	3	0.8419	0	0	0.2317	0.618467	0.336295	2.72853
9726	ZNF646	zinc finger protein 646	-	NP_055514	0	0	0.2243	0	0	0.2332	0	0	0.2225	0.226667	0.00572917	1	1	0.7818	3	3	0.8419	0	0	0.2317	0.618467	0.336295	2.72853
1636	ACE	angiotensin I converting enzyme	ACE1|CD143|DCP|DCP1|ICH|MVCD3	NP_000780;NP_001171528;NP_690043	1	1	0.4038	3	3	0.7929	3	3	0.7564	0.651033	0.214887	6	6	2.5196	8	8	1.8326	4	4	0.9734	1.7752	0.774697	2.72674
1768	DNAH6	dynein, axonemal, heavy chain 6	DNHL1|Dnahc6|HL-2|HL2	NP_001361	0	0	0.2243	0	0	0.2332	0	0	0.2225	0.226667	0.00572917	0	0	0.4343	1	1	0.4457	4	4	0.9734	0.6178	0.308011	2.72559
2009	EML1	echinoderm microtubule associated protein like 1	ELP79|EMAP|EMAPL|HuEMAP	NP_001008707;NP_004425	1	1	0.4038	0	0	0.2332	0	0	0.2225	0.2865	0.101726	3	3	1.4768	1	1	0.4457	1	1	0.4172	0.7799	0.603701	2.72216
54477	PLEKHA5	pleckstrin homology domain containing A5	PEPP-2|PEPP2	NP_001137293;NP_001177789;NP_001243399;NP_001243716;NP_061885	1	1	0.4038	0	0	0.2332	1	1	0.4004	0.3458	0.0975293	1	1	0.7818	6	6	1.4363	2	2	0.6026	0.940233	0.438851	2.71901
10473	HMGN4	high mobility group nucleosomal binding domain 4	HMG17L3|NHC	NP_006344	0	0	0.2243	1	1	0.4197	0	0	0.2225	0.288833	0.113337	2	3	1.4768	2	2	0.6438	0	0	0.2317	0.7841	0.634296	2.71471
8189	SYMPK	symplekin	SPK|SYM	NP_004810	3	3	0.7627	3	3	0.7929	3	3	0.7564	0.770667	0.0195106	7	7	2.8672	10	11	2.4271	4	4	0.9734	2.08923	0.991078	2.71094
6935	ZEB1	zinc finger E-box binding homeobox 1	AREB6|BZP|DELTAEF1|FECD6|NIL2A|PPCD3|TCF8|ZFHEP|ZFHX1A	NP_001121600;NP_001167564;NP_001167565;NP_001167566;NP_001167567;NP_001310567;NP_001310570;NP_001310571;NP_001310572;NP_001310573;NP_001310574;NP_001310575;NP_001310576;NP_001310577;NP_001310578;NP_001310579;NP_001310580;NP_001310581;NP_001310582;NP_001310583;NP_001310584;NP_001310585;NP_001310586;NP_001310587;NP_001310588;NP_001310589;NP_001310590;NP_001310591;NP_001310592;NP_001310593;NP_001310…	1	1	0.4038	0	0	0.2332	0	0	0.2225	0.2865	0.101726	3	3	1.4768	0	0	0.2476	2	2	0.6026	0.775667	0.632611	2.70739
9321	TRIP11	thyroid hormone receptor interactor 11	ACG1A|CEV14|GMAP-210|GMAP210|TRIP-11|TRIP230	NP_001308780;NP_004230	3	3	0.7627	4	4	0.9795	0	0	0.2225	0.6549	0.389843	7	8	3.2148	6	6	1.4363	2	2	0.6026	1.75123	1.33427	2.67405
1281	COL3A1	collagen type III alpha 1	EDS4A	NP_000081	0	0	0.2243	2	2	0.6063	0	0	0.2225	0.351033	0.221069	0	0	0.4343	1	3	0.8419	7	7	1.5297	0.9353	0.553641	2.66442
7461	CLIP2	CAP-Gly domain containing linker protein 2	CLIP|CLIP-115|CYLN2|WBSCR3|WBSCR4|WSCR3|WSCR4	NP_003379;NP_115797	0	0	0.2243	0	0	0.2332	0	0	0.2225	0.226667	0.00572917	2	2	1.1293	1	1	0.4457	0	0	0.2317	0.602233	0.468827	2.65691
9464	HAND2	heart and neural crest derivatives expressed 2	DHAND2|Hed|Thing2|bHLHa26|dHand	NP_068808	0	0	0.2243	0	0	0.2332	0	0	0.2225	0.226667	0.00572917	1	2	1.1293	1	1	0.4457	0	0	0.2317	0.602233	0.468827	2.65691
4772	NFATC1	nuclear factor of activated T-cells, cytoplasmic, calcineurin-dependent 1	NF-ATC|NF-ATc1.2|NFAT2|NFATc	NP_001265598;NP_001265599;NP_001265601;NP_001265602;NP_001265604;NP_006153;NP_765975;NP_765976;NP_765977;NP_765978	0	0	0.2243	0	0	0.2332	0	0	0.2225	0.226667	0.00572917	2	2	1.1293	1	1	0.4457	0	0	0.2317	0.602233	0.468827	2.65691
4776	NFATC4	nuclear factor of activated T-cells, cytoplasmic, calcineurin-dependent 4	NF-AT3|NF-ATC4|NFAT3	NP_001129494;NP_001185894;NP_001185895;NP_001185896;NP_001275731;NP_001306972;NP_004545	0	0	0.2243	0	0	0.2332	0	0	0.2225	0.226667	0.00572917	2	2	1.1293	1	1	0.4457	0	0	0.2317	0.602233	0.468827	2.65691
8227	AKAP17A	A-kinase anchoring protein 17A	721P|AKAP-17A|CCDC133|CXYorf3|DXYS155E|PRKA17A|SFRS17A|XE7|XE7Y	NP_005079	0	0	0.2243	0	0	0.2332	0	0	0.2225	0.226667	0.00572917	2	2	1.1293	0	0	0.2476	1	1	0.4172	0.598033	0.46784	2.63838
64755	C16orf58	chromosome 16 open reading frame 58	RUS	NP_073581	0	0	0.2243	0	0	0.2332	0	0	0.2225	0.226667	0.00572917	2	2	1.1293	0	0	0.2476	1	1	0.4172	0.598033	0.46784	2.63838
8573	CASK	calcium/calmodulin-dependent serine protein kinase (MAGUK family)	CAGH39|CAMGUK|CMG|FGS4|LIN2|MICPCH|MRXSNA|TNRC8	NP_001119526;NP_001119527;NP_003679	0	0	0.2243	0	0	0.2332	0	0	0.2225	0.226667	0.00572917	2	2	1.1293	0	0	0.2476	1	1	0.4172	0.598033	0.46784	2.63838
282973	JAKMIP3	Janus kinase and microtubule interacting protein 3	C10orf14|C10orf39|Jamip3|NECC2|bA140A10.5	NP_001098991;NP_001310015;NP_001310016;NP_001310017;NP_001310018;NP_001310019	0	0	0.2243	0	0	0.2332	0	0	0.2225	0.226667	0.00572917	1	2	1.1293	0	0	0.2476	1	1	0.4172	0.598033	0.46784	2.63838
4645	MYO5B	myosin VB	-	NP_001073936	0	0	0.2243	0	0	0.2332	0	0	0.2225	0.226667	0.00572917	1	2	1.1293	0	0	0.2476	1	1	0.4172	0.598033	0.46784	2.63838
2649	NR6A1	nuclear receptor subfamily 6 group A member 1	CT150|GCNF|GCNF1|NR61|RTR|hGCNF|hRTR	NP_001265475;NP_001480;NP_201591	0	0	0.2243	0	0	0.2332	0	0	0.2225	0.226667	0.00572917	1	2	1.1293	0	0	0.2476	1	1	0.4172	0.598033	0.46784	2.63838
57551	TAOK1	TAO kinase 1	KFC-B|MAP3K16|MARKK|PSK-2|PSK2|TAO1|hKFC-B|hTAOK1	NP_065842;NP_079418	0	0	0.2243	0	0	0.2332	0	0	0.2225	0.226667	0.00572917	2	2	1.1293	0	0	0.2476	1	1	0.4172	0.598033	0.46784	2.63838
283989	TSEN54	tRNA splicing endonuclease subunit 54	PCH2A|PCH4|PCH5|SEN54L|sen54	NP_997229	0	0	0.2243	0	0	0.2332	0	0	0.2225	0.226667	0.00572917	2	2	1.1293	0	0	0.2476	1	1	0.4172	0.598033	0.46784	2.63838
54963	UCKL1	uridine-cytidine kinase 1-like 1	UCK1L|URKL1	NP_001180308;NP_060329	0	0	0.2243	0	0	0.2332	0	0	0.2225	0.226667	0.00572917	2	2	1.1293	0	0	0.2476	1	1	0.4172	0.598033	0.46784	2.63838
4548	MTR	5-methyltetrahydrofolate-homocysteine methyltransferase	HMAG|MS|cblG	NP_000245;NP_001278868;NP_001278869	0	0	0.2243	0	0	0.2332	3	3	0.7564	0.404633	0.304671	2	2	1.1293	8	8	1.8326	0	0	0.2317	1.06453	0.802413	2.63086
3024	HIST1H1A	histone cluster 1, H1a	H1.1|H1A|H1F1|HIST1	NP_005316	3	8	1.6602	6	8	1.7259	4	8	1.6464	1.6775	0.0424798	6	16	5.9969	4	11	2.4271	11	24	4.6834	4.36913	1.80553	2.60455
66036	MTMR9	myotubularin related protein 9	C8orf9|LIP-STYX|MTMR8	NP_056273	1	1	0.4038	0	0	0.2332	0	0	0.2225	0.2865	0.101726	1	1	0.7818	3	3	0.8419	2	2	0.6026	0.7421	0.124492	2.59023
25942	SIN3A	SIN3 transcription regulator family member A	-	NP_001138829;NP_001138830;NP_056292	3	3	0.7627	0	0	0.2332	3	3	0.7564	0.5841	0.303905	6	7	2.8672	6	6	1.4363	0	0	0.2317	1.51173	1.31937	2.58814
81628	TSC22D4	TSC22 domain family member 4	THG-1|THG1|TILZ2	NP_001289972;NP_112197	0	0	0.2243	0	0	0.2332	1	1	0.4004	0.285967	0.099202	2	2	1.1293	3	3	0.8419	0	0	0.2317	0.7343	0.458372	2.56778
22862	FNDC3A	fibronectin type III domain containing 3A	FNDC3|HUGO|bA203I16.1|bA203I16.5	NP_001073141;NP_001265367;NP_055738	0	0	0.2243	1	1	0.4197	2	2	0.5784	0.407467	0.177367	3	3	1.4768	5	5	1.2381	1	1	0.4172	1.04403	0.555819	2.56225
5498	PPOX	protoporphyrinogen oxidase	PPO|V290M|VP	NP_000300;NP_001116236	0	0	0.2243	1	1	0.4197	1	1	0.4004	0.348133	0.107676	4	4	1.8244	0	0	0.2476	2	2	0.6026	0.891533	0.827156	2.5609
440193	CCDC88C	coiled-coil domain containing 88C	DAPLE|HKRP2|KIAA1509|SCA40	NP_001073883	0	0	0.2243	1	1	0.4197	0	0	0.2225	0.288833	0.113337	1	1	0.7818	2	2	0.6438	3	3	0.788	0.737867	0.0815231	2.55465
4696	NDUFA3	NADH:ubiquinone oxidoreductase subunit A3	B9|CI-B9	NP_004533	2	2	0.5833	1	1	0.4197	0	0	0.2225	0.4085	0.180661	2	3	1.4768	3	4	1.04	1	2	0.6026	1.0398	0.4371	2.54541
401024	FSIP2	fibrous sheath interacting protein 2	-	NP_775922	0	0	0.2243	1	1	0.4197	0	0	0.2225	0.288833	0.113337	2	2	1.1293	3	3	0.8419	0	0	0.2317	0.7343	0.458372	2.5423
50807	ASAP1	ArfGAP with SH3 domain, ankyrin repeat and PH domain 1	AMAP1|CENTB4|DDEF1|PAG2|PAP|ZG14P	NP_001234925;NP_060952	2	2	0.5833	1	1	0.4197	3	3	0.7564	0.586467	0.168372	4	4	1.8244	10	10	2.2289	1	1	0.4172	1.49017	0.950972	2.54092
6726	SRP9	signal recognition particle 9kDa	ALURBP	NP_001123912;NP_003124	4	6	1.3012	2	2	0.6063	3	4	0.9344	0.9473	0.34763	4	12	4.6057	3	5	1.2381	4	6	1.3443	2.39603	1.91436	2.52933
54443	ANLN	anillin actin binding protein	FSGS8|Scraps|scra	NP_001271230;NP_001271231;NP_061155	0	0	0.2243	1	1	0.4197	0	0	0.2225	0.288833	0.113337	2	2	1.1293	2	2	0.6438	1	1	0.4172	0.7301	0.36381	2.52776
8805	TRIM24	tripartite motif containing 24	PTC6|RNF82|TF1A|TIF1|TIF1A|TIF1ALPHA|hTIF1	NP_003843;NP_056989	1	1	0.4038	1	1	0.4197	3	3	0.7564	0.526633	0.199143	4	6	2.5196	4	5	1.2381	0	0	0.2317	1.3298	1.1467	2.5251
55170	PRMT6	protein arginine methyltransferase 6	HRMT1L6	NP_060607	0	0	0.2243	0	0	0.2332	1	1	0.4004	0.285967	0.099202	2	2	1.1293	0	0	0.2476	3	3	0.788	0.721633	0.444581	2.52349
4695	NDUFA2	NADH:ubiquinone oxidoreductase subunit A2	B8|CD14|CIB8	NP_001171941;NP_002479	1	1	0.4038	1	1	0.4197	1	1	0.4004	0.407967	0.0103026	2	4	1.8244	3	3	0.8419	1	1	0.4172	1.02783	0.72179	2.51941
55035	NOL8	nucleolar protein 8	C9orf34|NOP132|bA62C3.3|bA62C3.4	NP_001243323;NP_060418	2	2	0.5833	0	0	0.2332	0	0	0.2225	0.346333	0.205289	1	1	0.7818	4	4	1.04	2	3	0.788	0.869933	0.147315	2.51184
51466	EVL	Enah/Vasp-like	RNB6	NP_057421	0	0	0.2243	0	0	0.2332	0	0	0.2225	0.226667	0.00572917	0	0	0.4343	4	4	1.04	0	0	0.2317	0.568667	0.420569	2.50882
3240	HP	haptoglobin	BP|HP2ALPHA2|HPA1S	NP_001119574;NP_001305067;NP_005134	0	0	0.2243	0	0	0.2332	0	0	0.2225	0.226667	0.00572917	0	0	0.4343	4	4	1.04	0	0	0.2317	0.568667	0.420569	2.50882
51274	KLF3	Kruppel-like factor 3 (basic)	BKLF	NP_057615	0	0	0.2243	0	0	0.2332	0	0	0.2225	0.226667	0.00572917	0	0	0.4343	3	4	1.04	0	0	0.2317	0.568667	0.420569	2.50882
6304	SATB1	SATB homeobox 1	-	NP_001124482;NP_001182399;NP_001309800;NP_001309801;NP_001309802;NP_001309803;NP_001309804;NP_001309805;NP_002962	0	0	0.2243	0	0	0.2332	0	0	0.2225	0.226667	0.00572917	0	0	0.4343	2	4	1.04	0	0	0.2317	0.568667	0.420569	2.50882
55602	CDKN2AIP	CDKN2A interacting protein	CARF	NP_001304272;NP_060102	3	3	0.7627	2	2	0.6063	2	2	0.5784	0.649133	0.099336	7	7	2.8672	4	4	1.04	4	4	0.9734	1.62687	1.07468	2.50621
23236	PLCB1	phospholipase C beta 1	EIEE12|PI-PLC|PLC-154|PLC-I|PLC154|PLCB1A|PLCB1B	NP_056007;NP_877398	2	2	0.5833	0	0	0.2332	4	4	0.9344	0.583633	0.3506	5	6	2.5196	7	7	1.6344	0	0	0.2317	1.4619	1.15366	2.50483
22839	DLGAP4	discs large homolog associated protein 4	DAP-4|DAP4|DLP4|SAPAP-4|SAPAP4	NP_001035951;NP_055717;NP_892118	1	1	0.4038	0	0	0.2332	0	0	0.2225	0.2865	0.101726	3	3	1.4768	0	0	0.2476	1	1	0.4172	0.713867	0.666139	2.49168
253959	RALGAPA1	Ral GTPase activating protein catalytic alpha subunit 1	GARNL1|GRIPE|RalGAPalpha1|TULIP1|p240	NP_001269972;NP_001269973;NP_055805;NP_919277	1	1	0.4038	0	0	0.2332	0	0	0.2225	0.2865	0.101726	3	3	1.4768	0	0	0.2476	1	1	0.4172	0.713867	0.666139	2.49168
90441	ZNF622	zinc finger protein 622	ZPR9	NP_219482	1	1	0.4038	0	0	0.2332	0	0	0.2225	0.2865	0.101726	3	3	1.4768	0	0	0.2476	1	1	0.4172	0.713867	0.666139	2.49168
5875	RABGGTA	Rab geranylgeranyltransferase alpha subunit	PTAR3	NP_004572;NP_878256	3	3	0.7627	0	0	0.2332	1	1	0.4004	0.465433	0.270674	3	3	1.4768	3	3	0.8419	5	5	1.1589	1.1592	0.31745	2.49058
8139	GAN	gigaxonin	GAN1|KLHL16	NP_071324	0	0	0.2243	0	0	0.2332	0	0	0.2225	0.226667	0.00572917	0	0	0.4343	3	3	0.8419	1	1	0.4172	0.564467	0.240416	2.49029
64943	NT5DC2	5'-nucleotidase domain containing 2	-	NP_001127703;NP_075059	2	2	0.5833	1	1	0.4197	1	1	0.4004	0.4678	0.10049	3	3	1.4768	4	4	1.04	4	4	0.9734	1.1634	0.273448	2.48696
948	CD36	CD36 molecule	BDPLT10|CHDS7|FAT|GP3B|GP4|GPIV|PASIV|SCARB3	NP_000063;NP_001001547;NP_001001548;NP_001120915;NP_001120916;NP_001276837;NP_001276838;NP_001276840	0	0	0.2243	0	0	0.2332	0	0	0.2225	0.226667	0.00572917	0	0	0.4343	2	2	0.6438	2	2	0.6026	0.560233	0.11099	2.47162
2592	GALT	galactose-1-phosphate uridylyltransferase	-	NP_000146;NP_001245261	0	0	0.2243	0	0	0.2332	0	0	0.2225	0.226667	0.00572917	0	0	0.4343	2	2	0.6438	2	2	0.6026	0.560233	0.11099	2.47162
29995	LMCD1	LIM and cysteine-rich domains 1	-	NP_001265162;NP_001265163;NP_001265164;NP_055398	0	0	0.2243	0	0	0.2332	0	0	0.2225	0.226667	0.00572917	0	0	0.4343	2	2	0.6438	2	2	0.6026	0.560233	0.11099	2.47162
55174	INTS10	integrator complex subunit 10	C8orf35|INT10	NP_060612	0	0	0.2243	1	1	0.4197	0	0	0.2225	0.288833	0.113337	3	3	1.4768	0	0	0.2476	1	1	0.4172	0.713867	0.666139	2.47155
9757	KMT2B	lysine (K)-specific methyltransferase 2B	CXXC10|HRX2|MLL1B|MLL2|MLL4|TRX2|WBP-7|WBP7	NP_055542	0	0	0.2243	0	0	0.2332	0	0	0.2225	0.226667	0.00572917	1	1	0.7818	2	2	0.6438	0	0	0.2317	0.552433	0.286205	2.43721
401551	WDR38	WD repeat domain 38	-	NP_001038941;NP_001263303;NP_001263304;NP_001263305	0	0	0.2243	0	0	0.2332	0	0	0.2225	0.226667	0.00572917	1	1	0.7818	2	2	0.6438	0	0	0.2317	0.552433	0.286205	2.43721
90701	SEC11C	SEC11 homolog C, signal peptidase complex subunit	SEC11L3|SPC21|SPCS4C	NP_001294870;NP_150596	0	0	0.2243	0	0	0.2332	0	0	0.2225	0.226667	0.00572917	0	0	0.4343	0	0	0.2476	4	4	0.9734	0.551767	0.376889	2.43426
23053	ZSWIM8	zinc finger, SWIM-type containing 8	KIAA0913	NP_001229416;NP_001229417;NP_055852	0	0	0.2243	0	0	0.2332	0	0	0.2225	0.226667	0.00572917	0	0	0.4343	0	0	0.2476	4	4	0.9734	0.551767	0.376889	2.43426
55758	RCOR3	REST corepressor 3	-	NP_001129695;NP_001129696;NP_001129697;NP_060724	1	1	0.4038	0	0	0.2332	1	1	0.4004	0.3458	0.0975293	2	3	1.4768	1	1	0.4457	2	2	0.6026	0.8417	0.555579	2.43407
54439	RBM27	RNA binding motif protein 27	ARRS1|Psc1|ZC3H18|ZC3H20	NP_061862	4	4	0.9422	1	1	0.4197	2	2	0.5784	0.646767	0.267875	6	7	2.8672	6	6	1.4363	1	1	0.4172	1.57357	1.23075	2.43297
538	ATP7A	ATPase, Cu++ transporting, alpha polypeptide	DSMAX|MK|MNK|SMAX3	NP_000043;NP_001269153	1	1	0.4038	0	0	0.2332	0	0	0.2225	0.2865	0.101726	0	0	0.4343	5	5	1.2381	1	1	0.4172	0.696533	0.469088	2.43118
1286	COL4A4	collagen type IV alpha 4	CA44	NP_000083	0	0	0.2243	1	1	0.4197	1	1	0.4004	0.348133	0.107676	3	3	1.4768	2	2	0.6438	1	1	0.4172	0.845933	0.557971	2.42991
9181	ARHGEF2	Rho/Rac guanine nucleotide exchange factor 2	GEF|GEF-H1|GEFH1|LFP40|P40	NP_001155855;NP_001155856;NP_004714	10	10	2.0193	5	5	1.1661	4	5	1.1124	1.4326	0.508806	14	14	5.3013	15	16	3.418	8	8	1.7152	3.47817	1.79381	2.42787
4301	MLLT4	myeloid/lymphoid or mixed-lineage leukemia; translocated to, 4	AF6|MLL-AF6	NP_001035089;NP_001193937;NP_001278893	3	3	0.7627	6	6	1.3526	0	0	0.2225	0.779267	0.565232	6	7	2.8672	8	8	1.8326	4	4	0.9734	1.89107	0.948253	2.42673
8906	AP1G2	adaptor related protein complex 1 gamma 2 subunit	G2AD	NP_001269403;NP_001269404;NP_003908	0	0	0.2243	0	0	0.2332	0	0	0.2225	0.226667	0.00572917	1	1	0.7818	1	1	0.4457	1	1	0.4172	0.548233	0.202776	2.41868
57118	CAMK1D	calcium/calmodulin dependent protein kinase ID	CKLiK|CaM-K1|CaMKID	NP_065130;NP_705718	0	0	0.2243	0	0	0.2332	0	0	0.2225	0.226667	0.00572917	1	1	0.7818	1	1	0.4457	1	1	0.4172	0.548233	0.202776	2.41868
8318	CDC45	cell division cycle 45	CDC45L|CDC45L2|PORC-PI-1	NP_001171481;NP_001171482;NP_003495	0	0	0.2243	0	0	0.2332	0	0	0.2225	0.226667	0.00572917	1	1	0.7818	1	1	0.4457	1	1	0.4172	0.548233	0.202776	2.41868
6416	MAP2K4	mitogen-activated protein kinase kinase 4	JNKK|JNKK1|MAPKK4|MEK4|MKK4|PRKMK4|SAPKK-1|SAPKK1|SEK1|SERK1|SKK1	NP_001268364;NP_003001	0	0	0.2243	0	0	0.2332	0	0	0.2225	0.226667	0.00572917	1	1	0.7818	1	1	0.4457	1	1	0.4172	0.548233	0.202776	2.41868
91862	MARVELD3	MARVEL domain containing 3	MARVD3|MRVLDC3	NP_001017967;NP_001258258;NP_443090	0	0	0.2243	0	0	0.2332	0	0	0.2225	0.226667	0.00572917	1	1	0.7818	1	1	0.4457	1	1	0.4172	0.548233	0.202776	2.41868
4233	MET	MET proto-oncogene, receptor tyrosine kinase	AUTS9|DFNB97|HGFR|RCCP2|c-Met	NP_000236;NP_001120972;NP_001311330;NP_001311331	0	0	0.2243	0	0	0.2332	0	0	0.2225	0.226667	0.00572917	1	1	0.7818	1	1	0.4457	1	1	0.4172	0.548233	0.202776	2.41868
4486	MST1R	macrophage stimulating 1 receptor	CD136|CDw136|PTK8|RON	NP_001231866;NP_001305842;NP_002438	0	0	0.2243	0	0	0.2332	0	0	0.2225	0.226667	0.00572917	1	1	0.7818	1	1	0.4457	1	1	0.4172	0.548233	0.202776	2.41868
55274	PHF10	PHD finger protein 10	BAF45A|XAP135	NP_060758;NP_579866	0	0	0.2243	0	0	0.2332	0	0	0.2225	0.226667	0.00572917	1	1	0.7818	1	1	0.4457	1	1	0.4172	0.548233	0.202776	2.41868
6725	SRMS	src-related kinase lacking C-terminal regulatory tyrosine and N-terminal myristylation sites	C20orf148|SRM|dJ697K14.1	NP_543013	0	0	0.2243	0	0	0.2332	0	0	0.2225	0.226667	0.00572917	1	1	0.7818	1	1	0.4457	1	1	0.4172	0.548233	0.202776	2.41868
112840	WDR89	WD repeat domain 89	C14orf150|MSTP050	NP_001008726;NP_001245201;NP_542397	0	0	0.2243	1	1	0.4197	0	0	0.2225	0.288833	0.113337	0	0	0.4343	3	5	1.2381	1	1	0.4172	0.696533	0.469088	2.41154
1939	EIF2D	eukaryotic translation initiation factor 2D	HCA56|LGTN	NP_001188407;NP_008824	0	0	0.2243	1	1	0.4197	2	2	0.5784	0.407467	0.177367	2	2	1.1293	3	3	0.8419	4	4	0.9734	0.981533	0.143873	2.40887
1769	DNAH8	dynein, axonemal, heavy chain 8	ATPase|hdhc9	NP_001193856	0	0	0.2243	0	0	0.2332	0	0	0.2225	0.226667	0.00572917	1	1	0.7818	0	0	0.2476	2	2	0.6026	0.544	0.271878	2.4
29915	HCFC2	host cell factor C2	HCF-2|HCF2	NP_037452	0	0	0.2243	0	0	0.2332	0	0	0.2225	0.226667	0.00572917	1	1	0.7818	0	0	0.2476	2	2	0.6026	0.544	0.271878	2.4
27037	TRMT2A	tRNA methyltransferase 2 homolog A	HTF9C	NP_001244923;NP_073564;NP_892029	0	0	0.2243	0	0	0.2332	0	0	0.2225	0.226667	0.00572917	1	1	0.7818	0	0	0.2476	2	2	0.6026	0.544	0.271878	2.4
6280	S100A9	S100 calcium binding protein A9	60B8AG|CAGB|CFAG|CGLB|L1AG|LIAG|MAC387|MIF|MRP14|NIF|P14	NP_002956	3	3	0.7627	0	0	0.2332	0	0	0.2225	0.406133	0.308842	0	0	0.4343	5	10	2.2289	0	0	0.2317	0.964967	1.09928	2.37598
112724	RDH13	retinol dehydrogenase 13 (all-trans/9-cis)	SDR7C3	NP_001139443;NP_612421	1	1	0.4038	0	0	0.2332	0	0	0.2225	0.2865	0.101726	1	1	0.7818	1	3	0.8419	1	1	0.4172	0.6803	0.229824	2.37452
10776	ARPP19	cAMP regulated phosphoprotein 19kDa	ARPP-16|ARPP-19|ARPP16|ENSAL	NP_001293120;NP_001293124;NP_001293125;NP_006619	1	1	0.4038	1	2	0.6063	0	0	0.2225	0.410867	0.191998	2	3	1.4768	1	3	0.8419	2	2	0.6026	0.973767	0.451772	2.37003
57719	ANO8	anoctamin 8	KIAA1623|TMEM16H	NP_066010	0	0	0.2243	0	0	0.2332	0	0	0.2225	0.226667	0.00572917	2	2	1.1293	0	0	0.2476	0	0	0.2317	0.5362	0.513701	2.36559
55745	AP5M1	adaptor related protein complex 5, mu 1 subunit	C14orf108|MUDENG|Mu5|MuD	NP_060699	0	0	0.2243	0	0	0.2332	0	0	0.2225	0.226667	0.00572917	1	2	1.1293	0	0	0.2476	0	0	0.2317	0.5362	0.513701	2.36559
84071	ARMC2	armadillo repeat containing 2	bA787I22.1	NP_001273538;NP_115507	0	0	0.2243	0	0	0.2332	0	0	0.2225	0.226667	0.00572917	2	2	1.1293	0	0	0.2476	0	0	0.2317	0.5362	0.513701	2.36559
55049	C19orf60	chromosome 19 open reading frame 60	-	NP_001093888;NP_001093889	0	0	0.2243	0	0	0.2332	0	0	0.2225	0.226667	0.00572917	2	2	1.1293	0	0	0.2476	0	0	0.2317	0.5362	0.513701	2.36559
9478	CABP1	calcium binding protein 1	CALBRAIN|HCALB_BR	NP_001028849;NP_004267;NP_112482	0	0	0.2243	0	0	0.2332	0	0	0.2225	0.226667	0.00572917	2	2	1.1293	0	0	0.2476	0	0	0.2317	0.5362	0.513701	2.36559
8536	CAMK1	calcium/calmodulin-dependent protein kinase I	CAMKI	NP_003647	0	0	0.2243	0	0	0.2332	0	0	0.2225	0.226667	0.00572917	2	2	1.1293	0	0	0.2476	0	0	0.2317	0.5362	0.513701	2.36559
343099	CCDC18	coiled-coil domain containing 18	NY-SAR-41	NP_001293005;NP_996769	0	0	0.2243	0	0	0.2332	0	0	0.2225	0.226667	0.00572917	2	2	1.1293	0	0	0.2476	0	0	0.2317	0.5362	0.513701	2.36559
84952	CGNL1	cingulin-like 1	JACOP	NP_001239264;NP_116255	0	0	0.2243	0	0	0.2332	0	0	0.2225	0.226667	0.00572917	2	2	1.1293	0	0	0.2476	0	0	0.2317	0.5362	0.513701	2.36559
1198	CLK3	CDC like kinase 3	PHCLK3|PHCLK3/152	NP_001123500;NP_003983	0	0	0.2243	0	0	0.2332	0	0	0.2225	0.226667	0.00572917	2	2	1.1293	0	0	0.2476	0	0	0.2317	0.5362	0.513701	2.36559
54973	CPSF3L	cleavage and polyadenylation specific factor 3-like	CPSF73L|INT11|INTS11|RC-68|RC68	NP_001243385;NP_001243389;NP_001243391;NP_001243392;NP_060341	0	0	0.2243	0	0	0.2332	0	0	0.2225	0.226667	0.00572917	2	2	1.1293	0	0	0.2476	0	0	0.2317	0.5362	0.513701	2.36559
53944	CSNK1G1	casein kinase 1 gamma 1	CK1gamma1	NP_071331	0	0	0.2243	0	0	0.2332	0	0	0.2225	0.226667	0.00572917	2	2	1.1293	0	0	0.2476	0	0	0.2317	0.5362	0.513701	2.36559
9150	CTDP1	CTD phosphatase subunit 1	CCFDN|FCP1	NP_001189433;NP_001305440;NP_004706;NP_430255	0	0	0.2243	0	0	0.2332	0	0	0.2225	0.226667	0.00572917	2	2	1.1293	0	0	0.2476	0	0	0.2317	0.5362	0.513701	2.36559
8701	DNAH11	dynein, axonemal, heavy chain 11	CILD7|DNAHBL|DNAHC11|DNHBL|DPL11	NP_001264044	0	0	0.2243	0	0	0.2332	0	0	0.2225	0.226667	0.00572917	2	2	1.1293	0	0	0.2476	0	0	0.2317	0.5362	0.513701	2.36559
1879	EBF1	early B-cell factor 1	COE1|EBF|O/E-1|OLF1	NP_001277289;NP_001311030;NP_001311032;NP_001311035;NP_001311036;NP_001311037;NP_001311038;NP_001311040;NP_076870;NP_874367	0	0	0.2243	0	0	0.2332	0	0	0.2225	0.226667	0.00572917	2	2	1.1293	0	0	0.2476	0	0	0.2317	0.5362	0.513701	2.36559
80237	ELL3	elongation factor for RNA polymerase II 3	-	NP_079441	0	0	0.2243	0	0	0.2332	0	0	0.2225	0.226667	0.00572917	2	2	1.1293	0	0	0.2476	0	0	0.2317	0.5362	0.513701	2.36559
3097	HIVEP2	human immunodeficiency virus type I enhancer binding protein 2	HIV-EP2|MBP-2|MIBP1|SHN2|ZAS2|ZNF40B	NP_006725	0	0	0.2243	0	0	0.2332	0	0	0.2225	0.226667	0.00572917	2	2	1.1293	0	0	0.2476	0	0	0.2317	0.5362	0.513701	2.36559
3363	HTR7	5-hydroxytryptamine (serotonin) receptor 7, adenylate cyclase-coupled	5-HT7	NP_000863;NP_062873;NP_062874	0	0	0.2243	0	0	0.2332	0	0	0.2225	0.226667	0.00572917	1	2	1.1293	0	0	0.2476	0	0	0.2317	0.5362	0.513701	2.36559
54627	MAP10	microtubule associated protein 10	KIAA1383|MTR120	NP_061963	0	0	0.2243	0	0	0.2332	0	0	0.2225	0.226667	0.00572917	2	2	1.1293	0	0	0.2476	0	0	0.2317	0.5362	0.513701	2.36559
23139	MAST2	microtubule associated serine/threonine kinase 2	MAST205|MTSSK	NP_001306174;NP_001311249;NP_001311250;NP_055927	0	0	0.2243	0	0	0.2332	0	0	0.2225	0.226667	0.00572917	2	2	1.1293	0	0	0.2476	0	0	0.2317	0.5362	0.513701	2.36559
23383	MAU2	MAU2 sister chromatid cohesion factor	KIAA0892|MAU2L|SCC4|mau-2	NP_056144	0	0	0.2243	0	0	0.2332	0	0	0.2225	0.226667	0.00572917	2	2	1.1293	0	0	0.2476	0	0	0.2317	0.5362	0.513701	2.36559
2122	MECOM	MDS1 and EVI1 complex locus	AML1-EVI-1|EVI1|MDS1|MDS1-EVI1|PRDM3	NP_001098547;NP_001098548;NP_001157471;NP_001157472;NP_001192123;NP_004982;NP_005232	0	0	0.2243	0	0	0.2332	0	0	0.2225	0.226667	0.00572917	2	2	1.1293	0	0	0.2476	0	0	0.2317	0.5362	0.513701	2.36559
4350	MPG	N-methylpurine DNA glycosylase	AAG|ADPG|APNG|CRA36.1|MDG|Mid1|PIG11|PIG16|anpg	NP_001015052;NP_001015054;NP_002425	0	0	0.2243	0	0	0.2332	0	0	0.2225	0.226667	0.00572917	2	2	1.1293	0	0	0.2476	0	0	0.2317	0.5362	0.513701	2.36559
4588	MUC6	mucin 6, oligomeric mucus/gel-forming	MUC-6	NP_005952	0	0	0.2243	0	0	0.2332	0	0	0.2225	0.226667	0.00572917	2	2	1.1293	0	0	0.2476	0	0	0.2317	0.5362	0.513701	2.36559
9678	PHF14	PHD finger protein 14	-	NP_055475	0	0	0.2243	0	0	0.2332	0	0	0.2225	0.226667	0.00572917	2	2	1.1293	0	0	0.2476	0	0	0.2317	0.5362	0.513701	2.36559
51669	SARAF	store-operated calcium entry-associated regulatory factor	FOAP-7|HSPC035|TMEM66|XTP3	NP_001271168;NP_057211	0	0	0.2243	0	0	0.2332	0	0	0.2225	0.226667	0.00572917	1	2	1.1293	0	0	0.2476	0	0	0.2317	0.5362	0.513701	2.36559
51460	SFMBT1	Scm-like with four mbt domains 1	RU1|SFMBT|hSFMBT	NP_057413	0	0	0.2243	0	0	0.2332	0	0	0.2225	0.226667	0.00572917	2	2	1.1293	0	0	0.2476	0	0	0.2317	0.5362	0.513701	2.36559
6954	TCP11	t-complex 11, testis-specific	D6S230E|FPPR	NP_001087197;NP_001248746;NP_001248747;NP_001248748;NP_001248749;NP_001248750;NP_061149	0	0	0.2243	0	0	0.2332	0	0	0.2225	0.226667	0.00572917	2	2	1.1293	0	0	0.2476	0	0	0.2317	0.5362	0.513701	2.36559
80263	TRIM45	tripartite motif containing 45	RNF99	NP_001139107;NP_079464	0	0	0.2243	0	0	0.2332	0	0	0.2225	0.226667	0.00572917	1	2	1.1293	0	0	0.2476	0	0	0.2317	0.5362	0.513701	2.36559
9668	ZNF432	zinc finger protein 432	-	NP_001309213;NP_001309214;NP_055465	0	0	0.2243	0	0	0.2332	0	0	0.2225	0.226667	0.00572917	2	2	1.1293	0	0	0.2476	0	0	0.2317	0.5362	0.513701	2.36559
55511	SAGE1	sarcoma antigen 1	CT14|SAGE	NP_061136	2	3	0.7627	0	0	0.2332	1	1	0.4004	0.465433	0.270674	2	4	1.8244	3	5	1.2381	0	0	0.2317	1.09807	0.805531	2.35924
23310	NCAPD3	non-SMC condensin II complex subunit D3	CAP-D3|CAPD3|hCAP-D3|hHCP-6|hcp-6	NP_056076	1	1	0.4038	0	0	0.2332	1	1	0.4004	0.3458	0.0975293	1	1	0.7818	5	5	1.2381	1	1	0.4172	0.812367	0.411303	2.34924
60493	FASTKD5	FAST kinase domains 5	dJ1187M17.5	NP_068598	1	1	0.4038	0	0	0.2332	0	0	0.2225	0.2865	0.101726	1	1	0.7818	1	1	0.4457	3	3	0.788	0.671833	0.195862	2.34497
116449	CLNK	cytokine dependent hematopoietic cell linker	MIST	NP_443196	0	0	0.2243	1	1	0.4197	0	0	0.2225	0.288833	0.113337	1	1	0.7818	2	2	0.6438	2	2	0.6026	0.676067	0.0938563	2.34068
57117	INTS12	integrator complex subunit 12	INT12|PHF22|SBBI22	NP_001135943;NP_065128	0	0	0.2243	1	1	0.4197	0	0	0.2225	0.288833	0.113337	1	1	0.7818	2	2	0.6438	2	2	0.6026	0.676067	0.0938563	2.34068
6093	ROCK1	Rho associated coiled-coil containing protein kinase 1	P160ROCK|ROCK-I	NP_005397	0	0	0.2243	0	0	0.2332	1	1	0.4004	0.285967	0.099202	2	2	1.1293	2	2	0.6438	0	0	0.2317	0.668267	0.4493	2.33687
6942	TCF20	transcription factor 20 (AR1)	AR1|SPBP|TCF-20	NP_005641;NP_852469	0	0	0.2243	0	0	0.2332	1	1	0.4004	0.285967	0.099202	2	2	1.1293	2	2	0.6438	0	0	0.2317	0.668267	0.4493	2.33687
140467	ZNF358	zinc finger protein 358	ZFEND	NP_060553	1	1	0.4038	0	0	0.2332	0	0	0.2225	0.2865	0.101726	2	2	1.1293	2	2	0.6438	0	0	0.2317	0.668267	0.4493	2.33252
79187	FSD1	fibronectin type III and SPRY domain containing 1	GLFND|MIR1	NP_077309	3	3	0.7627	0	0	0.2332	0	0	0.2225	0.406133	0.308842	4	5	2.172	0	0	0.2476	1	1	0.4172	0.9456	1.06547	2.3283
25904	CNOT10	CCR4-NOT transcription complex subunit 10	-	NP_001243670;NP_001243671;NP_056257	0	0	0.2243	1	1	0.4197	1	1	0.4004	0.348133	0.107676	1	1	0.7818	4	4	1.04	2	2	0.6026	0.808133	0.219886	2.32133
701	BUB1B	BUB1 mitotic checkpoint serine/threonine kinase B	BUB1beta|BUBR1|Bub1A|MAD3L|MVA1|SSK1|hBUBR1	NP_001202	1	1	0.4038	0	0	0.2332	0	0	0.2225	0.2865	0.101726	2	2	1.1293	1	1	0.4457	1	1	0.4172	0.664067	0.403156	2.31786
26276	VPS33B	vacuolar protein sorting 33 homolog B (yeast)	-	NP_001276077;NP_001276078;NP_061138	0	0	0.2243	1	1	0.4197	0	0	0.2225	0.288833	0.113337	2	2	1.1293	2	2	0.6438	0	0	0.2317	0.668267	0.4493	2.31368
23279	NUP160	nucleoporin 160kDa	-	NP_001305328;NP_056046	3	3	0.7627	5	5	1.1661	13	13	2.5365	1.48843	0.929793	8	8	3.2148	24	25	5.2023	9	9	1.9007	3.43927	1.66221	2.31066
6714	SRC	SRC proto-oncogene, non-receptor tyrosine kinase	ASV|SRC1|c-SRC|p60-Src	NP_005408;NP_938033	5	5	1.1217	2	2	0.6063	1	1	0.4004	0.709467	0.371552	6	6	2.5196	5	5	1.2381	5	5	1.1589	1.63887	0.763765	2.31
57708	MIER1	mesoderm induction early response 1, transcriptional regulator	ER1|MI-ER1	NP_001071168;NP_001071169;NP_001071170;NP_001071171;NP_001071172;NP_001139582;NP_001139583;NP_001139584;NP_001139585;NP_001265144;NP_065999	0	0	0.2243	2	2	0.6063	0	0	0.2225	0.351033	0.221069	1	1	0.7818	4	4	1.04	2	2	0.6026	0.808133	0.219886	2.30216
2800	GOLGA1	golgin A1	golgin-97	NP_002068	0	0	0.2243	1	1	0.4197	0	0	0.2225	0.288833	0.113337	2	2	1.1293	1	1	0.4457	1	1	0.4172	0.664067	0.403156	2.29913
4123	MAN2C1	mannosidase alpha class 2C member 1	MAN6A8|MANA|MANA1	NP_001243423;NP_001243424;NP_001243425;NP_006706	0	0	0.2243	1	1	0.4197	0	0	0.2225	0.288833	0.113337	2	2	1.1293	1	1	0.4457	1	1	0.4172	0.664067	0.403156	2.29913
64783	RBM15	RNA binding motif protein 15	OTT|OTT1|SPEN	NP_001188474;NP_073605	3	3	0.7627	4	4	0.9795	5	5	1.1124	0.951533	0.176519	9	10	3.9102	7	7	1.6344	4	4	0.9734	2.17267	1.54062	2.28333
55964	SEPT3	septin 3	SEP3|bK250D10.3	NP_061979;NP_663786	0	0	0.2243	1	1	0.4197	2	2	0.5784	0.407467	0.177367	1	1	0.7818	3	3	0.8419	5	5	1.1589	0.927533	0.20261	2.27634
51537	MTFP1	mitochondrial fission process 1	HSPC242|MTP18	NP_001003704;NP_057582	0	0	0.2243	1	1	0.4197	1	1	0.4004	0.348133	0.107676	2	2	1.1293	2	2	0.6438	2	2	0.6026	0.7919	0.292922	2.2747
256536	TCERG1L	transcription elongation regulator 1 like	-	NP_777597	1	1	0.4038	1	1	0.4197	0	0	0.2225	0.348667	0.109552	1	2	1.1293	2	2	0.6438	2	2	0.6026	0.7919	0.292922	2.27122
9254	CACNA2D2	calcium channel, voltage-dependent, alpha 2/delta subunit 2	CACNA2D	NP_001005505;NP_001167522;NP_001278030;NP_006021	0	0	0.2243	1	1	0.4197	0	0	0.2225	0.288833	0.113337	3	3	1.4768	0	0	0.2476	0	0	0.2317	0.652033	0.714313	2.25747
4249	MGAT5	mannosyl (alpha-1,6-)-glycoprotein beta-1,6-N-acetyl-glucosaminyltransferase	GNT-V|GNT-VA	NP_002401	0	0	0.2243	1	1	0.4197	0	0	0.2225	0.288833	0.113337	2	3	1.4768	0	0	0.2476	0	0	0.2317	0.652033	0.714313	2.25747
1373	CPS1	carbamoyl-phosphate synthase 1	CPSASE1|PHN	NP_001116105;NP_001116106;NP_001866	1	1	0.4038	0	0	0.2332	1	1	0.4004	0.3458	0.0975293	2	3	1.4768	1	1	0.4457	1	1	0.4172	0.7799	0.603701	2.25535
3039	HBA1	hemoglobin subunit alpha 1	HBA-T3|HBH	NP_000549	4	16	3.0965	4	15	3.0323	4	16	3.0707	3.0665	0.0323054	3	8	3.2148	5	39	7.979	6	50	9.5105	6.90143	3.28326	2.25059
3040	HBA2	hemoglobin subunit alpha 2	HBA-T2|HBH	NP_000508	4	16	3.0965	4	15	3.0323	4	16	3.0707	3.0665	0.0323054	3	8	3.2148	5	39	7.979	6	50	9.5105	6.90143	3.28326	2.25059
6499	SKIV2L	Ski2 like RNA helicase	170A|DDX13|HLP|SKI2|SKI2W|SKIV2|THES2	NP_008860	5	5	1.1217	5	5	1.1661	11	11	2.1805	1.48943	0.598893	11	11	4.2579	23	23	4.8057	4	4	0.9734	3.34567	2.07262	2.24627
10428	CFDP1	craniofacial development protein 1	BCNT|BUCENTAUR|CENP-29|CP27|SWC5|Yeti|p97	NP_006315	2	2	0.5833	2	2	0.6063	4	4	0.9344	0.708	0.196405	3	5	2.172	6	6	1.4363	5	5	1.1589	1.58907	0.523542	2.24444
55020	TTC38	tetratricopeptide repeat domain 38	LL22NC03-5H6.5	NP_060401	0	0	0.2243	1	1	0.4197	1	1	0.4004	0.348133	0.107676	3	3	1.4768	1	1	0.4457	1	1	0.4172	0.7799	0.603701	2.24023
51428	DDX41	DEAD-box helicase 41	ABS	NP_001308661;NP_001308759;NP_057306	2	2	0.5833	0	0	0.2332	1	1	0.4004	0.405633	0.175109	3	3	1.4768	2	2	0.6438	2	2	0.6026	0.907733	0.493257	2.23782
23022	PALLD	palladin, cytoskeletal associated protein	CGI-151|CGI151|MYN|PNCA1|SIH002	NP_001159580;NP_001159581;NP_001159582;NP_057165	2	2	0.5833	1	1	0.4197	0	0	0.2225	0.4085	0.180661	3	3	1.4768	2	2	0.6438	2	2	0.6026	0.907733	0.493257	2.22211
51297	BPIFA1	BPI fold containing family A member 1	LUNX|NASG|PLUNC|SPLUNC1|SPURT|bA49G10.5	NP_001230122;NP_057667;NP_570913	0	0	0.2243	0	0	0.2332	0	0	0.2225	0.226667	0.00572917	0	0	0.4343	3	3	0.8419	0	0	0.2317	0.502633	0.310786	2.2175
149954	BPIFB4	BPI fold containing family B member 4	C20orf186|LPLUNC4|RY2G5|dJ726C3.5	NP_872325	0	0	0.2243	0	0	0.2332	0	0	0.2225	0.226667	0.00572917	0	0	0.4343	3	3	0.8419	0	0	0.2317	0.502633	0.310786	2.2175
3512	JCHAIN	joining chain of multimeric IgA and IgM	IGCJ|IGJ|JCH	NP_653247	0	0	0.2243	0	0	0.2332	0	0	0.2225	0.226667	0.00572917	0	0	0.4343	1	3	0.8419	0	0	0.2317	0.502633	0.310786	2.2175
2648	KAT2A	K(lysine) acetyltransferase 2A	GCN5|GCN5L2|PCAF-b|hGCN5	NP_066564	0	0	0.2243	0	0	0.2332	0	0	0.2225	0.226667	0.00572917	0	0	0.4343	3	3	0.8419	0	0	0.2317	0.502633	0.310786	2.2175
10743	RAI1	retinoic acid induced 1	SMCR|SMS	NP_109590	0	0	0.2243	0	0	0.2332	0	0	0.2225	0.226667	0.00572917	0	0	0.4343	3	3	0.8419	0	0	0.2317	0.502633	0.310786	2.2175
6317	SERPINB3	serpin peptidase inhibitor, clade B (ovalbumin), member 3	HsT1196|SCC|SCCA-1|SCCA-PD|SCCA1|T4-A	NP_008850	0	0	0.2243	0	0	0.2332	0	0	0.2225	0.226667	0.00572917	0	0	0.4343	2	3	0.8419	0	0	0.2317	0.502633	0.310786	2.2175
23137	SMC5	structural maintenance of chromosomes 5	SMC5L1	NP_055925	0	0	0.2243	0	0	0.2332	0	0	0.2225	0.226667	0.00572917	0	0	0.4343	3	3	0.8419	0	0	0.2317	0.502633	0.310786	2.2175
7753	ZNF202	zinc finger protein 202	ZKSCAN10|ZSCAN42	NP_001288708;NP_001288709;NP_001288748;NP_003446	0	0	0.2243	0	0	0.2332	0	0	0.2225	0.226667	0.00572917	0	0	0.4343	2	3	0.8419	0	0	0.2317	0.502633	0.310786	2.2175
729288	ZNF286B	zinc finger protein 286B	ZNF286C|ZNF286L|ZNF590	NP_001138517	0	0	0.2243	0	0	0.2332	0	0	0.2225	0.226667	0.00572917	0	0	0.4343	2	3	0.8419	0	0	0.2317	0.502633	0.310786	2.2175
7621	ZNF70	zinc finger protein 70	Cos17	NP_068735	0	0	0.2243	0	0	0.2332	0	0	0.2225	0.226667	0.00572917	0	0	0.4343	2	3	0.8419	0	0	0.2317	0.502633	0.310786	2.2175
7629	ZNF76	zinc finger protein 76	D6S229E|ZNF523|Zfp523	NP_001278961;NP_003418	0	0	0.2243	0	0	0.2332	0	0	0.2225	0.226667	0.00572917	0	0	0.4343	2	3	0.8419	0	0	0.2317	0.502633	0.310786	2.2175
2890	GRIA1	glutamate receptor, ionotropic, AMPA 1	GLUH1|GLUR1|GLURA|GluA1|HBGR1	NP_000818;NP_001107655;NP_001244948;NP_001244949;NP_001244950;NP_001244951;NP_001244952	1	1	0.4038	1	1	0.4197	1	1	0.4004	0.407967	0.0103026	1	3	1.4768	1	1	0.4457	1	3	0.788	0.9035	0.525164	2.21464
2891	GRIA2	glutamate receptor, ionotropic, AMPA 2	GLUR2|GLURB|GluA2|GluR-K2|HBGR2	NP_000817;NP_001077088;NP_001077089	1	1	0.4038	1	1	0.4197	1	1	0.4004	0.407967	0.0103026	1	3	1.4768	1	1	0.4457	1	3	0.788	0.9035	0.525164	2.21464
2892	GRIA3	glutamate receptor, ionotropic, AMPA 3	GLUR-C|GLUR-K3|GLUR3|GLURC|GluA3|MRX94	NP_000819;NP_001243672;NP_015564	1	1	0.4038	1	1	0.4197	1	1	0.4004	0.407967	0.0103026	1	3	1.4768	1	1	0.4457	1	3	0.788	0.9035	0.525164	2.21464
2893	GRIA4	glutamate receptor, ionotropic, AMPA 4	GLUR4|GLUR4C|GLURD|GluA4	NP_000820;NP_001070711;NP_001070712;NP_001106283	1	1	0.4038	1	1	0.4197	1	1	0.4004	0.407967	0.0103026	1	3	1.4768	1	1	0.4457	1	3	0.788	0.9035	0.525164	2.21464
23122	CLASP2	cytoplasmic linker associated protein 2	-	NP_001193973;NP_055912	5	5	1.1217	0	0	0.2332	6	7	1.4684	0.9411	0.637097	6	8	3.2148	11	11	2.4271	2	2	0.6026	2.0815	1.33995	2.21177
55726	ASUN	asunder spermatogenesis regulator	C12orf11|GCT1|Mat89Bb|NET48|SPATA30	NP_060634	0	0	0.2243	2	2	0.6063	0	0	0.2225	0.351033	0.221069	3	3	1.4768	0	0	0.2476	2	2	0.6026	0.775667	0.632611	2.20967
11099	PTPN21	protein tyrosine phosphatase, non-receptor type 21	PTPD1|PTPRL10	NP_008970	0	0	0.2243	1	1	0.4197	3	3	0.7564	0.4668	0.269159	2	3	1.4768	2	2	0.6438	2	4	0.9734	1.03133	0.419511	2.20937
7798	LUZP1	leucine zipper protein 1	LUZP	NP_001136018;NP_361013	3	3	0.7627	1	1	0.4197	0	0	0.2225	0.4683	0.27336	4	4	1.8244	4	4	1.04	0	0	0.2317	1.03203	0.79638	2.20379
54785	BORCS6	BLOC-1 related complex subunit 6	C17orf59|PRO2472	NP_060092	0	0	0.2243	0	0	0.2332	0	0	0.2225	0.226667	0.00572917	0	0	0.4343	2	2	0.6438	1	1	0.4172	0.498433	0.126181	2.19897
57511	COG6	component of oligomeric golgi complex 6	CDG2L|COD2|SHNS	NP_001138551;NP_065802	0	0	0.2243	0	0	0.2332	0	0	0.2225	0.226667	0.00572917	0	0	0.4343	2	2	0.6438	1	1	0.4172	0.498433	0.126181	2.19897
168002	DACT2	dishevelled-binding antagonist of beta-catenin 2	C6orf116|DAPPER2|DPR2|bA503C24.7	NP_001273279;NP_001273280;NP_999627	0	0	0.2243	0	0	0.2332	0	0	0.2225	0.226667	0.00572917	0	0	0.4343	2	2	0.6438	1	1	0.4172	0.498433	0.126181	2.19897
348654	GEN1	GEN1, Holliday junction 5' flap endonuclease	Gen	NP_001123481;NP_872431	0	0	0.2243	0	0	0.2332	0	0	0.2225	0.226667	0.00572917	0	0	0.4343	2	2	0.6438	1	1	0.4172	0.498433	0.126181	2.19897
8916	HERC3	HECT and RLD domain containing E3 ubiquitin protein ligase 3	-	NP_001258531;NP_001305434;NP_055421	0	0	0.2243	0	0	0.2332	0	0	0.2225	0.226667	0.00572917	0	0	0.4343	2	2	0.6438	1	1	0.4172	0.498433	0.126181	2.19897
3635	INPP5D	inositol polyphosphate-5-phosphatase D	SHIP|SHIP-1|SHIP1|SIP-145|hp51CN|p150Ship	NP_001017915;NP_005532	0	0	0.2243	0	0	0.2332	0	0	0.2225	0.226667	0.00572917	0	0	0.4343	2	2	0.6438	1	1	0.4172	0.498433	0.126181	2.19897
27031	NPHP3	nephronophthisis 3 (adolescent)	CFAP31|MKS7|NPH3|RHPD|RHPD1|SLSN3	NP_694972	0	0	0.2243	0	0	0.2332	0	0	0.2225	0.226667	0.00572917	0	0	0.4343	2	2	0.6438	1	1	0.4172	0.498433	0.126181	2.19897
55848	PLGRKT	plasminogen receptor, C-terminal lysine transmembrane protein	AD025|C9orf46|MDS030|PLG-RKT|Plg-R(KT)	NP_060935	0	0	0.2243	0	0	0.2332	0	0	0.2225	0.226667	0.00572917	0	0	0.4343	2	2	0.6438	1	1	0.4172	0.498433	0.126181	2.19897
5664	PSEN2	presenilin 2	AD3L|AD4|CMD1V|PS2|STM2	NP_000438;NP_036618	0	0	0.2243	0	0	0.2332	0	0	0.2225	0.226667	0.00572917	0	0	0.4343	2	2	0.6438	1	1	0.4172	0.498433	0.126181	2.19897
91445	RNF185	ring finger protein 185	-	NP_001129297;NP_689480	0	0	0.2243	0	0	0.2332	0	0	0.2225	0.226667	0.00572917	0	0	0.4343	2	2	0.6438	1	1	0.4172	0.498433	0.126181	2.19897
201266	SLC39A11	solute carrier family 39 member 11	C17orf26|ZIP11	NP_001153242;NP_631916	0	0	0.2243	0	0	0.2332	0	0	0.2225	0.226667	0.00572917	0	0	0.4343	2	2	0.6438	1	1	0.4172	0.498433	0.126181	2.19897
4747	NEFL	neurofilament, light polypeptide	CMT1F|CMT2E|NF-L|NF68|NFL|PPP1R110	NP_006149	1	6	1.3012	3	5	1.1661	3	8	1.6464	1.37123	0.24769	9	14	5.3013	3	8	1.8326	3	9	1.9007	3.01153	1.98329	2.19622
9875	URB1	URB1 ribosome biogenesis 1 homolog (S. cerevisiae)	C21orf108|NPA1	NP_055640	3	3	0.7627	6	6	1.3526	1	1	0.4004	0.838567	0.480612	6	6	2.5196	7	8	1.8326	5	5	1.1589	1.83703	0.680361	2.19068
3159	HMGA1	high mobility group AT-hook 1	HMG-R|HMGA1A|HMGIY	NP_001306006;NP_001306007;NP_001306008;NP_001306009;NP_001306010;NP_001306011;NP_002122;NP_665906;NP_665908;NP_665909;NP_665910;NP_665912	3	3	0.7627	2	3	0.7929	4	6	1.2904	0.948667	0.296335	4	7	2.8672	5	8	1.8326	5	7	1.5297	2.0765	0.701314	2.18886
29926	GMPPA	GDP-mannose pyrophosphorylase A	AAMR	NP_037467;NP_995319	2	2	0.5833	1	1	0.4197	2	2	0.5784	0.527133	0.0930722	4	4	1.8244	3	3	0.8419	3	3	0.788	1.15143	0.583429	2.18433
55425	GPALPP1	GPALPP motifs containing 1	AD029|KIAA1704|LSR7|bA245H20.2	NP_001303880;NP_001303881;NP_061029	0	0	0.2243	1	1	0.4197	0	0	0.2225	0.288833	0.113337	0	0	0.4343	4	4	1.04	1	1	0.4172	0.6305	0.35474	2.18292
100131755	ARMCX4	armadillo repeat containing, X-linked 4	CXorf35|GASP4	NP_001243084	0	0	0.2243	0	0	0.2332	0	0	0.2225	0.226667	0.00572917	0	0	0.4343	1	1	0.4457	2	2	0.6026	0.4942	0.09405	2.18029
2990	GUSB	glucuronidase, beta	BG|MPS7	NP_000172;NP_001280033;NP_001280034;NP_001271219	0	0	0.2243	0	0	0.2332	0	0	0.2225	0.226667	0.00572917	0	0	0.4343	1	1	0.4457	2	2	0.6026	0.4942	0.09405	2.18029
200576	PIKFYVE	phosphoinositide kinase, FYVE finger containing	CFD|FAB1|HEL37|PIP5K|PIP5K3|ZFYVE29	NP_001171471;NP_055855;NP_689884	0	0	0.2243	0	0	0.2332	0	0	0.2225	0.226667	0.00572917	0	0	0.4343	1	1	0.4457	2	2	0.6026	0.4942	0.09405	2.18029
5453	POU3F1	POU class 3 homeobox 1	OCT6|OTF6|SCIP	NP_002690	0	0	0.2243	0	0	0.2332	0	0	0.2225	0.226667	0.00572917	0	0	0.4343	1	1	0.4457	2	2	0.6026	0.4942	0.09405	2.18029
5460	POU5F1	POU class 5 homeobox 1	OCT3|OCT4|OTF-3|OTF3|OTF4|Oct-3|Oct-4	NP_001167002;NP_001272915;NP_001272916;NP_002692;NP_976034	0	0	0.2243	0	0	0.2332	0	0	0.2225	0.226667	0.00572917	0	0	0.4343	1	1	0.4457	2	2	0.6026	0.4942	0.09405	2.18029
90507	SCRN2	secernin 2	Ses2	NP_001138495;NP_612364	0	0	0.2243	0	0	0.2332	0	0	0.2225	0.226667	0.00572917	0	0	0.4343	1	1	0.4457	2	2	0.6026	0.4942	0.09405	2.18029
9481	SLC25A27	solute carrier family 25 member 27	UCP4	NP_001190980;NP_001190981;NP_004268	0	0	0.2243	0	0	0.2332	0	0	0.2225	0.226667	0.00572917	0	0	0.4343	1	1	0.4457	2	2	0.6026	0.4942	0.09405	2.18029
145389	SLC38A6	solute carrier family 38 member 6	NAT-1|SNAT6	NP_001166173;NP_722518	0	0	0.2243	0	0	0.2332	0	0	0.2225	0.226667	0.00572917	0	0	0.4343	1	1	0.4457	1	2	0.6026	0.4942	0.09405	2.18029
4087	SMAD2	SMAD family member 2	JV18|JV18-1|MADH2|MADR2|hMAD-2|hSMAD2	NP_001003652;NP_001129409;NP_005892	0	0	0.2243	0	0	0.2332	0	0	0.2225	0.226667	0.00572917	0	0	0.4343	1	1	0.4457	2	2	0.6026	0.4942	0.09405	2.18029
79971	WLS	wntless Wnt ligand secretion mediator	C1orf139|EVI|GPR177|MRP|mig-14	NP_001002292;NP_001180263;NP_079187	0	0	0.2243	0	0	0.2332	0	0	0.2225	0.226667	0.00572917	0	0	0.4343	1	1	0.4457	2	2	0.6026	0.4942	0.09405	2.18029
54583	EGLN1	egl-9 family hypoxia-inducible factor 1	C1orf12|ECYT3|HALAH|HIF-PH2|HIFPH2|HPH-2|HPH2|PHD2|SM20|ZMYND6	NP_071334	0	0	0.2243	2	2	0.6063	3	3	0.7564	0.529	0.274343	4	4	1.8244	3	3	0.8419	2	3	0.788	1.15143	0.583429	2.17662
3603	IL16	interleukin 16	LCF|NIL16|PRIL16|prIL-16	NP_001165599;NP_004504;NP_757366	0	0	0.2243	0	0	0.2332	1	1	0.4004	0.285967	0.099202	0	0	0.4343	2	2	0.6438	3	3	0.788	0.622033	0.177852	2.1752
208	AKT2	v-akt murine thymoma viral oncogene homolog 2	HIHGHH|PKBB|PKBBETA|PRKBB|RAC-BETA	NP_001229956;NP_001229957;NP_001617	2	2	0.5833	0	0	0.2332	1	1	0.4004	0.405633	0.175109	0	0	0.4343	5	5	1.2381	4	4	0.9734	0.881933	0.409632	2.17421
64411	ARAP3	ArfGAP with RhoGAP domain, ankyrin repeat and PH domain 3	CENTD3|DRAG1	NP_071926	1	1	0.4038	0	0	0.2332	0	0	0.2225	0.2865	0.101726	0	0	0.4343	2	2	0.6438	3	3	0.788	0.622033	0.177852	2.17115
5813	PURA	purine-rich element binding protein A	MRD31|PUR-ALPHA|PUR1|PURALPHA	NP_005850	1	1	0.4038	3	3	0.7929	5	5	1.1124	0.7697	0.354869	3	3	1.4768	6	7	1.6344	8	9	1.9007	1.67063	0.21426	2.1705
54874	FNBP1L	formin binding protein 1 like	C1orf39|TOCA1	NP_001020119;NP_001157945;NP_060207	0	0	0.2243	1	1	0.4197	2	2	0.5784	0.407467	0.177367	5	5	2.172	0	0	0.2476	0	0	0.2317	0.883767	1.11567	2.16893
30849	PIK3R4	phosphoinositide-3-kinase regulatory subunit 4	VPS15|p150	NP_055417	0	0	0.2243	0	0	0.2332	1	1	0.4004	0.285967	0.099202	1	1	0.7818	3	3	0.8419	0	0	0.2317	0.618467	0.336295	2.16272
118461	C10orf71	chromosome 10 open reading frame 71	-	NP_001128668	0	0	0.2243	0	0	0.2332	0	0	0.2225	0.226667	0.00572917	0	0	0.4343	0	0	0.2476	2	3	0.788	0.489967	0.274467	2.16162
56145	PCDHA3	protocadherin alpha 3	PCDH-ALPHA3	NP_061729;NP_113685	0	0	0.2243	0	0	0.2332	0	0	0.2225	0.226667	0.00572917	0	0	0.4343	0	0	0.2476	3	3	0.788	0.489967	0.274467	2.16162
56655	POLE4	polymerase (DNA-directed), epsilon 4, accessory subunit	YHHQ1|p12	NP_063949	0	0	0.2243	0	0	0.2332	0	0	0.2225	0.226667	0.00572917	0	0	0.4343	0	0	0.2476	2	3	0.788	0.489967	0.274467	2.16162
81858	SHARPIN	SHANK associated RH domain interactor	SIPL1	NP_112236	0	0	0.2243	0	0	0.2332	0	0	0.2225	0.226667	0.00572917	0	0	0.4343	0	0	0.2476	3	3	0.788	0.489967	0.274467	2.16162
10567	RABAC1	Rab acceptor 1 (prenylated)	PRA1|PRAF1|YIP3	NP_006414	0	0	0.2243	1	1	0.4197	0	0	0.2225	0.288833	0.113337	0	0	0.4343	2	2	0.6438	3	3	0.788	0.622033	0.177852	2.15361
149371	EXOC8	exocyst complex component 8	EXO84|Exo84p|SEC84	NP_787072	2	2	0.5833	2	2	0.6063	1	1	0.4004	0.53	0.112825	4	5	2.172	2	2	0.6438	2	2	0.6026	1.13947	0.894437	2.14994
1756	DMD	dystrophin	BMD|CMD3B|DXS142|DXS164|DXS206|DXS230|DXS239|DXS268|DXS269|DXS270|DXS272|MRX85	NP_000100;NP_003997;NP_004000;NP_004001;NP_004002;NP_004003;NP_004004;NP_004005;NP_004006;NP_004007;NP_004008;NP_004009;NP_004010;NP_004011;NP_004012;NP_004013;NP_004014	0	0	0.2243	0	0	0.2332	1	1	0.4004	0.285967	0.099202	1	1	0.7818	2	2	0.6438	1	1	0.4172	0.614267	0.184085	2.14804
80227	PAAF1	proteasomal ATPase associated factor 1	PAAF|Rpn14|WDR71	NP_001254732;NP_001254733;NP_001254734;NP_001254735;NP_079431	0	0	0.2243	0	0	0.2332	1	1	0.4004	0.285967	0.099202	1	1	0.7818	2	2	0.6438	1	1	0.4172	0.614267	0.184085	2.14804
116988	AGAP3	ArfGAP with GTPase domain, ankyrin repeat and PH domain 3	AGAP-3|CENTG3|CRAG|MRIP-1|cnt-g3	NP_001036000;NP_001268229;NP_001295233;NP_001295234;NP_114152	0	0	0.2243	0	0	0.2332	0	0	0.2225	0.226667	0.00572917	1	1	0.7818	1	1	0.4457	0	0	0.2317	0.4864	0.277299	2.14588
250	ALPP	alkaline phosphatase, placental	ALP|PALP|PLAP|PLAP-1	NP_001623	0	0	0.2243	0	0	0.2332	0	0	0.2225	0.226667	0.00572917	1	1	0.7818	1	1	0.4457	0	0	0.2317	0.4864	0.277299	2.14588
157567	ANKRD46	ankyrin repeat domain 46	ANK-S|GENX-115279	NP_001257306;NP_001257307;NP_001257308;NP_940683	0	0	0.2243	0	0	0.2332	0	0	0.2225	0.226667	0.00572917	1	1	0.7818	1	1	0.4457	0	0	0.2317	0.4864	0.277299	2.14588
8313	AXIN2	axin 2	AXIL|ODCRCS	NP_004646	0	0	0.2243	0	0	0.2332	0	0	0.2225	0.226667	0.00572917	1	1	0.7818	1	1	0.4457	0	0	0.2317	0.4864	0.277299	2.14588
8702	B4GALT4	UDP-Gal:betaGlcNAc beta 1,4- galactosyltransferase, polypeptide 4	B4Gal-T4|beta4Gal-T4	NP_003769;NP_997708	0	0	0.2243	0	0	0.2332	0	0	0.2225	0.226667	0.00572917	1	1	0.7818	1	1	0.4457	0	0	0.2317	0.4864	0.277299	2.14588
57597	BAHCC1	BAH domain and coiled-coil containing 1	BAHD2	NP_001278253	0	0	0.2243	0	0	0.2332	0	0	0.2225	0.226667	0.00572917	1	1	0.7818	1	1	0.4457	0	0	0.2317	0.4864	0.277299	2.14588
29117	BRD7	bromodomain containing 7	BP75|CELTIX1|NAG4	NP_001167455;NP_037395	0	0	0.2243	0	0	0.2332	0	0	0.2225	0.226667	0.00572917	1	1	0.7818	1	1	0.4457	0	0	0.2317	0.4864	0.277299	2.14588
283638	CEP170B	centrosomal protein 170B	CEP170R|FAM68C|KIAA0284	NP_001106197;NP_055820	0	0	0.2243	0	0	0.2332	0	0	0.2225	0.226667	0.00572917	1	1	0.7818	1	1	0.4457	0	0	0.2317	0.4864	0.277299	2.14588
85459	CEP295	centrosomal protein 295kDa	KIAA1731	NP_203753	0	0	0.2243	0	0	0.2332	0	0	0.2225	0.226667	0.00572917	1	1	0.7818	1	1	0.4457	0	0	0.2317	0.4864	0.277299	2.14588
55779	CFAP44	cilia and flagella associated protein 44	WDR52	NP_001157968;NP_060808	0	0	0.2243	0	0	0.2332	0	0	0.2225	0.226667	0.00572917	1	1	0.7818	1	1	0.4457	0	0	0.2317	0.4864	0.277299	2.14588
84570	COL25A1	collagen type XXV alpha 1	AMY|CFEOM5|CLAC|CLAC-P|CLACP	NP_001243003;NP_115907;NP_942014	0	0	0.2243	0	0	0.2332	0	0	0.2225	0.226667	0.00572917	1	1	0.7818	1	1	0.4457	0	0	0.2317	0.4864	0.277299	2.14588
57325	CSRP2BP	CSRP2 binding protein	ATAC2|CRP2BP|KAT14|PRO1194|dJ717M23.1	NP_065397	0	0	0.2243	0	0	0.2332	0	0	0.2225	0.226667	0.00572917	1	1	0.7818	1	1	0.4457	0	0	0.2317	0.4864	0.277299	2.14588
134218	DNAJC21	DnaJ heat shock protein family (Hsp40) member C21	DNAJA5|GS3|JJJ1	NP_001012339;NP_919259	0	0	0.2243	0	0	0.2332	0	0	0.2225	0.226667	0.00572917	1	1	0.7818	1	1	0.4457	0	0	0.2317	0.4864	0.277299	2.14588
23348	DOCK9	dedicator of cytokinesis 9	ZIZ1|ZIZIMIN1	NP_001123520;NP_001123521;NP_001123522;NP_001305778;NP_056111	0	0	0.2243	0	0	0.2332	0	0	0.2225	0.226667	0.00572917	1	1	0.7818	1	1	0.4457	0	0	0.2317	0.4864	0.277299	2.14588
80303	EFHD1	EF-hand domain family member D1	MST133|MSTP133|PP3051|SWS2	NP_001230181;NP_001295324;NP_079478	0	0	0.2243	0	0	0.2332	0	0	0.2225	0.226667	0.00572917	1	1	0.7818	1	1	0.4457	0	0	0.2317	0.4864	0.277299	2.14588
30846	EHD2	EH domain containing 2	PAST2	NP_055416	0	0	0.2243	0	0	0.2332	0	0	0.2225	0.226667	0.00572917	1	1	0.7818	1	1	0.4457	0	0	0.2317	0.4864	0.277299	2.14588
161436	EML5	echinoderm microtubule associated protein like 5	EMAP-2	NP_899243	0	0	0.2243	0	0	0.2332	0	0	0.2225	0.226667	0.00572917	1	1	0.7818	1	1	0.4457	0	0	0.2317	0.4864	0.277299	2.14588
57089	ENTPD7	ectonucleoside triphosphate diphosphohydrolase 7	LALP1	NP_065087	0	0	0.2243	0	0	0.2332	0	0	0.2225	0.226667	0.00572917	1	1	0.7818	1	1	0.4457	0	0	0.2317	0.4864	0.277299	2.14588
80028	FBXL18	F-box and leucine-rich repeat protein 18	Fbl18	NP_001308142;NP_079239	0	0	0.2243	0	0	0.2332	0	0	0.2225	0.226667	0.00572917	1	1	0.7818	1	1	0.4457	0	0	0.2317	0.4864	0.277299	2.14588
10517	FBXW10	F-box and WD repeat domain containing 10	Fbw10|HREP|SM25H2|SM2SH2	NP_001254514;NP_001254515	0	0	0.2243	0	0	0.2332	0	0	0.2225	0.226667	0.00572917	1	1	0.7818	1	1	0.4457	0	0	0.2317	0.4864	0.277299	2.14588
11146	GLMN	glomulin, FKBP associated protein	FAP|FAP48|FAP68|FKBPAP|GLML|GVM|VMGLOM	NP_001306612;NP_444504	0	0	0.2243	0	0	0.2332	0	0	0.2225	0.226667	0.00572917	1	1	0.7818	1	1	0.4457	0	0	0.2317	0.4864	0.277299	2.14588
2791	GNG11	guanine nucleotide binding protein (G protein), gamma 11	GNGT11	NP_004117	0	0	0.2243	0	0	0.2332	0	0	0.2225	0.226667	0.00572917	1	1	0.7818	1	1	0.4457	0	0	0.2317	0.4864	0.277299	2.14588
221914	GPC2	glypican 2	-	NP_689955	0	0	0.2243	0	0	0.2332	0	0	0.2225	0.226667	0.00572917	1	1	0.7818	1	1	0.4457	0	0	0.2317	0.4864	0.277299	2.14588
3778	KCNMA1	potassium channel, calcium activated large conductance subfamily M alpha, member 1	BKTM|KCa1.1|MaxiK|SAKCA|SLO|SLO-ALPHA|SLO1|bA205K10.1|mSLO1	NP_001014797;NP_001154824;NP_001154825;NP_001258447;NP_001258448;NP_001258449;NP_001258450;NP_001258451;NP_001309758;NP_001309759;NP_001309761;NP_001309764;NP_001309765;NP_001309766;NP_001309767;NP_001309768;NP_002238	0	0	0.2243	0	0	0.2332	0	0	0.2225	0.226667	0.00572917	1	1	0.7818	1	1	0.4457	0	0	0.2317	0.4864	0.277299	2.14588
4036	LRP2	LDL receptor related protein 2	DBS|GP330	NP_004516	0	0	0.2243	0	0	0.2332	0	0	0.2225	0.226667	0.00572917	1	1	0.7818	1	1	0.4457	0	0	0.2317	0.4864	0.277299	2.14588
55805	LRP2BP	LRP2 binding protein	-	NP_060879	0	0	0.2243	0	0	0.2332	0	0	0.2225	0.226667	0.00572917	1	1	0.7818	1	1	0.4457	0	0	0.2317	0.4864	0.277299	2.14588
9500	MAGED1	MAGE family member D1	DLXIN-1|NRAGE	NP_001005332;NP_001005333;NP_008917	0	0	0.2243	0	0	0.2332	0	0	0.2225	0.226667	0.00572917	1	1	0.7818	1	1	0.4457	0	0	0.2317	0.4864	0.277299	2.14588
4155	MBP	myelin basic protein	-	NP_001020252;NP_001020261;NP_001020263;NP_001020271;NP_001020272;NP_002376	0	0	0.2243	0	0	0.2332	0	0	0.2225	0.226667	0.00572917	1	1	0.7818	1	1	0.4457	0	0	0.2317	0.4864	0.277299	2.14588
29079	MED4	mediator complex subunit 4	ARC36|DRIP36|HSPC126|TRAP36|VDRIP	NP_001257558;NP_054885	0	0	0.2243	0	0	0.2332	0	0	0.2225	0.226667	0.00572917	1	1	0.7818	1	1	0.4457	0	0	0.2317	0.4864	0.277299	2.14588
4311	MME	membrane metallo-endopeptidase	CALLA|CD10|NEP|SFE	NP_000893;NP_009218;NP_009219;NP_009220	0	0	0.2243	0	0	0.2332	0	0	0.2225	0.226667	0.00572917	1	1	0.7818	1	1	0.4457	0	0	0.2317	0.4864	0.277299	2.14588
4600	MX2	MX dynamin-like GTPase 2	MXB	NP_002454	0	0	0.2243	0	0	0.2332	0	0	0.2225	0.226667	0.00572917	1	1	0.7818	1	1	0.4457	0	0	0.2317	0.4864	0.277299	2.14588
23327	NEDD4L	neural precursor cell expressed, developmentally down-regulated 4-like, E3 ubiquitin protein ligase	NEDD4-2|NEDD4.2|RSP5|hNEDD4-2	NP_001138436;NP_001138437;NP_001138438;NP_001138439;NP_001138440;NP_001138441;NP_001138442;NP_001138443;NP_001230889;NP_056092	0	0	0.2243	0	0	0.2332	0	0	0.2225	0.226667	0.00572917	1	1	0.7818	1	1	0.4457	0	0	0.2317	0.4864	0.277299	2.14588
169611	OLFML2A	olfactomedin like 2A	PRO34319	NP_001269644;NP_872293	0	0	0.2243	0	0	0.2332	0	0	0.2225	0.226667	0.00572917	1	1	0.7818	1	1	0.4457	0	0	0.2317	0.4864	0.277299	2.14588
114880	OSBPL6	oxysterol binding protein like 6	ORP6	NP_001188409;NP_001188410;NP_001188411;NP_115912;NP_665682	0	0	0.2243	0	0	0.2332	0	0	0.2225	0.226667	0.00572917	1	1	0.7818	1	1	0.4457	0	0	0.2317	0.4864	0.277299	2.14588
25957	PNISR	PNN-interacting serine/arginine-rich protein	C6orf111|HSPC306|SFRS18|SRrp130|bA98I9.2	NP_001309334;NP_001309335;NP_001309337;NP_001309339;NP_001309341;NP_001309342;NP_001309343;NP_001309344;NP_001309345;NP_001309346;NP_001309347;NP_001309348;NP_056306;NP_116259	0	0	0.2243	0	0	0.2332	0	0	0.2225	0.226667	0.00572917	1	1	0.7818	1	1	0.4457	0	0	0.2317	0.4864	0.277299	2.14588
2185	PTK2B	protein tyrosine kinase 2 beta	CADTK|CAKB|FADK2|FAK2|PKB|PTK|PYK2|RAFTK	NP_004094;NP_775266;NP_775267;NP_775268	0	0	0.2243	0	0	0.2332	0	0	0.2225	0.226667	0.00572917	1	1	0.7818	1	1	0.4457	0	0	0.2317	0.4864	0.277299	2.14588
9910	RABGAP1L	RAB GTPase activating protein 1-like	HHL|TBC1D18	NP_001030307;NP_001230692;NP_001230693;NP_001230694;NP_055672	0	0	0.2243	0	0	0.2332	0	0	0.2225	0.226667	0.00572917	1	1	0.7818	1	1	0.4457	0	0	0.2317	0.4864	0.277299	2.14588
64145	RBSN	rabenosyn, RAB effector	Rabenosyn-5|ZFYVE20	NP_001289307;NP_071735	0	0	0.2243	0	0	0.2332	0	0	0.2225	0.226667	0.00572917	1	1	0.7818	1	1	0.4457	0	0	0.2317	0.4864	0.277299	2.14588
84282	RNF135	ring finger protein 135	L13|MMFD|REUL|Riplet	NP_001171921;NP_115698;NP_922921	0	0	0.2243	0	0	0.2332	0	0	0.2225	0.226667	0.00572917	1	1	0.7818	1	1	0.4457	0	0	0.2317	0.4864	0.277299	2.14588
4920	ROR2	receptor tyrosine kinase-like orphan receptor 2	BDB|BDB1|NTRKR2	NP_001305133;NP_004551	0	0	0.2243	0	0	0.2332	0	0	0.2225	0.226667	0.00572917	1	1	0.7818	1	1	0.4457	0	0	0.2317	0.4864	0.277299	2.14588
7857	SCG2	secretogranin II	CHGC|EM66|SN|SgII	NP_003460	0	0	0.2243	0	0	0.2332	0	0	0.2225	0.226667	0.00572917	1	1	0.7818	1	1	0.4457	0	0	0.2317	0.4864	0.277299	2.14588
83590	TMUB1	transmembrane and ubiquitin-like domain containing 1	C7orf21|DULP|SB144	NP_001129516;NP_113622	0	0	0.2243	0	0	0.2332	0	0	0.2225	0.226667	0.00572917	1	1	0.7818	1	1	0.4457	0	0	0.2317	0.4864	0.277299	2.14588
57690	TNRC6C	trinucleotide repeat containing 6C	-	NP_001136112;NP_061869	0	0	0.2243	0	0	0.2332	0	0	0.2225	0.226667	0.00572917	1	1	0.7818	1	1	0.4457	0	0	0.2317	0.4864	0.277299	2.14588
64759	TNS3	tensin 3	TEM6|TENS1	NP_073585	0	0	0.2243	0	0	0.2332	0	0	0.2225	0.226667	0.00572917	1	1	0.7818	1	1	0.4457	0	0	0.2317	0.4864	0.277299	2.14588
7486	WRN	Werner syndrome, RecQ helicase-like	RECQ3|RECQL2|RECQL3	NP_000544	0	0	0.2243	0	0	0.2332	0	0	0.2225	0.226667	0.00572917	1	1	0.7818	1	1	0.4457	0	0	0.2317	0.4864	0.277299	2.14588
339448	C1orf174	chromosome 1 open reading frame 174	-	NP_997239	1	1	0.4038	0	0	0.2332	0	0	0.2225	0.2865	0.101726	1	1	0.7818	1	2	0.6438	1	1	0.4172	0.614267	0.184085	2.14404
55823	VPS11	VPS11, CORVET/HOPS core subunit	END1|PEP5|RNF108|hVPS11	NP_001277114;NP_068375	1	1	0.4038	0	0	0.2332	0	0	0.2225	0.2865	0.101726	1	1	0.7818	2	2	0.6438	1	1	0.4172	0.614267	0.184085	2.14404
23632	CA14	carbonic anhydrase XIV	CAXiV	NP_036245	0	0	0.2243	1	1	0.4197	1	1	0.4004	0.348133	0.107676	0	0	0.4343	2	2	0.6438	5	5	1.1589	0.745667	0.372886	2.1419
64122	FN3K	fructosamine 3 kinase	-	NP_071441	2	2	0.5833	0	0	0.2332	0	0	0.2225	0.346333	0.205289	0	0	0.4343	1	1	0.4457	6	6	1.3443	0.741433	0.522129	2.14081
6427	SRSF2	serine/arginine-rich splicing factor 2	PR264|SC-35|SC35|SFRS2|SFRS2A|SRp30b	NP_001182356;NP_003007	8	20	3.8148	8	14	2.8456	8	14	2.7146	3.125	0.600964	7	32	11.5657	8	17	3.6162	11	25	4.869	6.68363	4.27414	2.13876
57513	CASKIN2	CASK interacting protein 2	ANKS5B	NP_001136115;NP_065804	0	0	0.2243	0	0	0.2332	1	1	0.4004	0.285967	0.099202	1	1	0.7818	1	1	0.4457	1	2	0.6026	0.610033	0.168173	2.13323
285498	RNF212	ring finger protein 212	ZHP3	NP_001124506;NP_001180247;NP_919420	0	0	0.2243	0	0	0.2332	1	1	0.4004	0.285967	0.099202	1	1	0.7818	1	1	0.4457	1	2	0.6026	0.610033	0.168173	2.13323
139804	RBMXL3	RNA binding motif protein, X-linked-like 3	CXorf55	NP_001138818	1	1	0.4038	1	3	0.7929	1	3	0.7564	0.651033	0.214887	3	6	2.5196	3	4	1.04	1	2	0.6026	1.3874	1.00461	2.13107
24	ABCA4	ATP binding cassette subfamily A member 4	ABC10|ABCR|ARMD2|CORD3|FFM|RMP|RP19|STGD|STGD1	NP_000341	0	0	0.2243	0	0	0.2332	0	0	0.2225	0.226667	0.00572917	1	1	0.7818	0	0	0.2476	1	1	0.4172	0.4822	0.272967	2.12735
9212	AURKB	aurora kinase B	AIK2|AIM-1|AIM1|ARK2|AurB|IPL1|PPP1R48|STK12|STK5|aurkb-sv1|aurkb-sv2	NP_001243763;NP_001271455;NP_001300879;NP_001300880;NP_001300881;NP_001300882;NP_001300883;NP_001300884;NP_004208	0	0	0.2243	0	0	0.2332	0	0	0.2225	0.226667	0.00572917	1	1	0.7818	0	0	0.2476	1	1	0.4172	0.4822	0.272967	2.12735
8535	CBX4	chromobox 4	NBP16|PC2	NP_003646	0	0	0.2243	0	0	0.2332	0	0	0.2225	0.226667	0.00572917	1	1	0.7818	0	0	0.2476	1	1	0.4172	0.4822	0.272967	2.12735
8208	CHAF1B	chromatin assembly factor 1 subunit B	CAF-1|CAF-IP60|CAF1|CAF1A|CAF1P60|MPHOSPH7|MPP7	NP_005432	0	0	0.2243	0	0	0.2332	0	0	0.2225	0.226667	0.00572917	1	1	0.7818	0	0	0.2476	1	1	0.4172	0.4822	0.272967	2.12735
79789	CLMN	calmin (calponin-like, transmembrane)	-	NP_079010	0	0	0.2243	0	0	0.2332	0	0	0.2225	0.226667	0.00572917	1	1	0.7818	0	0	0.2476	1	1	0.4172	0.4822	0.272967	2.12735
57540	DISP3	dispatched RND transporter family member 3	PTCHD2	NP_065831	0	0	0.2243	0	0	0.2332	0	0	0.2225	0.226667	0.00572917	1	1	0.7818	0	0	0.2476	1	1	0.4172	0.4822	0.272967	2.12735
80258	EFHC2	EF-hand domain (C-terminal) containing 2	MRX74|dJ1158H2.1	NP_079460	0	0	0.2243	0	0	0.2332	0	0	0.2225	0.226667	0.00572917	1	1	0.7818	0	0	0.2476	1	1	0.4172	0.4822	0.272967	2.12735
8225	GTPBP6	GTP binding protein 6 (putative)	PGPL	NP_036359	0	0	0.2243	0	0	0.2332	0	0	0.2225	0.226667	0.00572917	1	1	0.7818	0	0	0.2476	1	1	0.4172	0.4822	0.272967	2.12735
9456	HOMER1	homer scaffolding protein 1	HOMER|HOMER1A|HOMER1B|HOMER1C|SYN47|Ves-1	NP_001264006;NP_001264007;NP_004263	0	0	0.2243	0	0	0.2332	0	0	0.2225	0.226667	0.00572917	1	1	0.7818	0	0	0.2476	1	1	0.4172	0.4822	0.272967	2.12735
3281	HSBP1	heat shock factor binding protein 1	NPC-A-13	NP_001528	0	0	0.2243	0	0	0.2332	0	0	0.2225	0.226667	0.00572917	1	1	0.7818	0	0	0.2476	1	1	0.4172	0.4822	0.272967	2.12735
3382	ICA1	islet cell autoantigen 1	ICA69|ICAp69	NP_001129492;NP_001263407;NP_004959;NP_071682	0	0	0.2243	0	0	0.2332	0	0	0.2225	0.226667	0.00572917	1	1	0.7818	0	0	0.2476	1	1	0.4172	0.4822	0.272967	2.12735
3756	KCNH1	potassium channel, voltage gated eag related subfamily H, member 1	EAG|EAG1|Kv10.1|TMBTS|h-eag	NP_002229;NP_758872	0	0	0.2243	0	0	0.2332	0	0	0.2225	0.226667	0.00572917	1	1	0.7818	0	0	0.2476	1	1	0.4172	0.4822	0.272967	2.12735
153364	MBLAC2	metallo-beta-lactamase domain containing 2	-	NP_981951	0	0	0.2243	0	0	0.2332	0	0	0.2225	0.226667	0.00572917	1	1	0.7818	0	0	0.2476	1	1	0.4172	0.4822	0.272967	2.12735
93432	MGAM2	maltase-glucoamylase 2 (putative)	-	NP_001280555	0	0	0.2243	0	0	0.2332	0	0	0.2225	0.226667	0.00572917	1	1	0.7818	0	0	0.2476	1	1	0.4172	0.4822	0.272967	2.12735
5064	PALM	paralemmin	-	NP_001035224;NP_002570	0	0	0.2243	0	0	0.2332	0	0	0.2225	0.226667	0.00572917	1	1	0.7818	0	0	0.2476	1	1	0.4172	0.4822	0.272967	2.12735
23133	PHF8	PHD finger protein 8	JHDM1F|MRXSSD|ZNF422	NP_001171825;NP_001171826;NP_001171827;NP_055922	0	0	0.2243	0	0	0.2332	0	0	0.2225	0.226667	0.00572917	1	1	0.7818	0	0	0.2476	1	1	0.4172	0.4822	0.272967	2.12735
57605	PITPNM2	phosphatidylinositol transfer protein, membrane associated 2	NIR-3|NIR3|RDGB2|RDGBA2	NP_001287730;NP_065896	0	0	0.2243	0	0	0.2332	0	0	0.2225	0.226667	0.00572917	1	1	0.7818	0	0	0.2476	1	1	0.4172	0.4822	0.272967	2.12735
53635	PTOV1	prostate tumor overexpressed 1	ACID2|PTOV-1	NP_001292034;NP_001292037;NP_059128	0	0	0.2243	0	0	0.2332	0	0	0.2225	0.226667	0.00572917	1	1	0.7818	0	0	0.2476	1	1	0.4172	0.4822	0.272967	2.12735
79890	RIN3	Ras and Rab interactor 3	-	NP_001306916;NP_079108	0	0	0.2243	0	0	0.2332	0	0	0.2225	0.226667	0.00572917	1	1	0.7818	0	0	0.2476	1	1	0.4172	0.4822	0.272967	2.12735
29901	SAC3D1	SAC3 domain containing 1	HSU79266|SHD1	NP_037431	0	0	0.2243	0	0	0.2332	0	0	0.2225	0.226667	0.00572917	1	1	0.7818	0	0	0.2476	1	1	0.4172	0.4822	0.272967	2.12735
10507	SEMA4D	semaphorin 4D	C9orf164|CD100|M-sema-G|SEMAJ|coll-4	NP_001135759;NP_006369	0	0	0.2243	0	0	0.2332	0	0	0.2225	0.226667	0.00572917	1	1	0.7818	0	0	0.2476	1	1	0.4172	0.4822	0.272967	2.12735
26037	SIPA1L1	signal-induced proliferation-associated 1 like 1	E6TP1	NP_001271174;NP_001271175;NP_001271176;NP_056371	0	0	0.2243	0	0	0.2332	0	0	0.2225	0.226667	0.00572917	1	1	0.7818	0	0	0.2476	1	1	0.4172	0.4822	0.272967	2.12735
23539	SLC16A8	solute carrier family 16 (monocarboxylate transporter), member 8	MCT3|REMP	NP_037488	0	0	0.2243	0	0	0.2332	0	0	0.2225	0.226667	0.00572917	1	1	0.7818	0	0	0.2476	1	1	0.4172	0.4822	0.272967	2.12735
6645	SNTB2	syntrophin beta 2	D16S2531E|EST25263|SNT2B2|SNT3|SNTL	NP_006741	0	0	0.2243	0	0	0.2332	0	0	0.2225	0.226667	0.00572917	1	1	0.7818	0	0	0.2476	1	1	0.4172	0.4822	0.272967	2.12735
100507050	TPBGL	trophoblast glycoprotein-like	-	NP_001182457	0	0	0.2243	0	0	0.2332	0	0	0.2225	0.226667	0.00572917	1	1	0.7818	0	0	0.2476	1	1	0.4172	0.4822	0.272967	2.12735
7272	TTK	TTK protein kinase	CT96|ESK|MPH1|MPS1|MPS1L1|PYT	NP_001160163;NP_003309	0	0	0.2243	0	0	0.2332	0	0	0.2225	0.226667	0.00572917	1	1	0.7818	0	0	0.2476	1	1	0.4172	0.4822	0.272967	2.12735
23090	ZNF423	zinc finger protein 423	Ebfaz|JBTS19|NPHP14|OAZ|Roaz|ZFP423|Zfp104|hOAZ	NP_001258549;NP_055884	0	0	0.2243	0	0	0.2332	0	0	0.2225	0.226667	0.00572917	1	1	0.7818	0	0	0.2476	1	1	0.4172	0.4822	0.272967	2.12735
84146	ZNF644	zinc finger protein 644	BM-005|MYP21|NatF|ZEP-2	NP_057704;NP_115562;NP_958357	0	0	0.2243	0	0	0.2332	0	0	0.2225	0.226667	0.00572917	1	1	0.7818	0	0	0.2476	1	1	0.4172	0.4822	0.272967	2.12735
26088	GGA1	golgi-associated, gamma adaptin ear containing, ARF binding protein 1	-	NP_001001560;NP_001166158;NP_001166159;NP_037497	0	0	0.2243	1	1	0.4197	0	0	0.2225	0.288833	0.113337	1	1	0.7818	2	2	0.6438	1	1	0.4172	0.614267	0.184085	2.12672
10244	RABEPK	Rab9 effector protein with kelch motifs	RAB9P40|bA65N13.1|p40	NP_001167623;NP_001167624;NP_005824	0	0	0.2243	2	2	0.6063	0	0	0.2225	0.351033	0.221069	0	0	0.4343	2	2	0.6438	4	5	1.1589	0.745667	0.372886	2.1242
54471	MIEF1	mitochondrial elongation factor 1	HSU79252|MID51|SMCR7L|dJ1104E15.3	NP_001291493;NP_061881	1	1	0.4038	0	0	0.2332	1	1	0.4004	0.3458	0.0975293	2	2	1.1293	3	3	0.8419	0	0	0.2317	0.7343	0.458372	2.12348
9168	TMSB10	thymosin beta 10	MIG12|TB10	NP_066926	1	2	0.5833	1	3	0.7929	1	2	0.5784	0.651533	0.122452	1	6	2.5196	1	3	0.8419	1	3	0.788	1.38317	0.984549	2.12294
55706	NDC1	NDC1 transmembrane nucleoporin	NET3|TMEM48	NP_001162023;NP_060557	2	2	0.5833	0	0	0.2332	1	1	0.4004	0.405633	0.175109	2	2	1.1293	3	3	0.8419	2	2	0.6026	0.857933	0.263716	2.11505
85313	PPIL4	peptidylprolyl isomerase like 4	HDCME13P	NP_624311	2	2	0.5833	0	0	0.2332	1	1	0.4004	0.405633	0.175109	2	2	1.1293	3	3	0.8419	2	2	0.6026	0.857933	0.263716	2.11505
2819	GPD1	glycerol-3-phosphate dehydrogenase 1	GPD-C|GPDH-C|HTGTI	NP_001244128;NP_005267	1	1	0.4038	0	0	0.2332	0	0	0.2225	0.2865	0.101726	1	1	0.7818	0	0	0.2476	3	3	0.788	0.6058	0.310226	2.11449
64757	MARC1	mitochondrial amidoxime reducing component 1	MOSC1	NP_073583	1	1	0.4038	0	0	0.2332	0	0	0.2225	0.2865	0.101726	1	1	0.7818	0	0	0.2476	3	3	0.788	0.6058	0.310226	2.11449
5256	PHKA2	phosphorylase kinase, alpha 2 (liver)	GSD9A|PHK|PYK|PYKL|XLG|XLG2	NP_000283	0	0	0.2243	0	0	0.2332	2	2	0.5784	0.3453	0.20192	2	2	1.1293	1	2	0.6438	1	1	0.4172	0.7301	0.36381	2.11439
150786	WTH3DI	RAB6C-like	-	NP_001071105	0	0	0.2243	1	1	0.4197	0	0	0.2225	0.288833	0.113337	1	1	0.7818	1	1	0.4457	1	2	0.6026	0.610033	0.168173	2.11206
652968	GATSL3	GATS protein-like 3	-	NP_001032755	1	1	0.4038	0	0	0.2332	1	1	0.4004	0.3458	0.0975293	2	2	1.1293	2	2	0.6438	1	1	0.4172	0.7301	0.36381	2.11134
23168	RTF1	RTF1 homolog, Paf1/RNA polymerase II complex component	GTL7|KIAA0252	NP_055953	4	4	0.9422	2	2	0.6063	5	5	1.1124	0.886967	0.257531	9	9	3.5625	7	7	1.6344	1	1	0.4172	1.87137	1.58598	2.10985
8602	NOP14	NOP14 nucleolar protein	C4orf9|NOL14|RES4-25|RES425|UTP2	NP_001278907;NP_001278908;NP_003694	6	6	1.3012	3	3	0.7929	5	5	1.1124	1.06883	0.256935	8	9	3.5625	10	10	2.2289	4	4	0.9734	2.25493	1.29475	2.10971
10454	TAB1	TGF-beta activated kinase 1/MAP3K7 binding protein 1	3'-Tab1|MAP3K7IP1	NP_006107;NP_705717	2	2	0.5833	0	0	0.2332	0	0	0.2225	0.346333	0.205289	2	2	1.1293	2	2	0.6438	1	1	0.4172	0.7301	0.36381	2.10808
100	ADA	adenosine deaminase	-	NP_000013;NP_001308979;NP_001308980	0	0	0.2243	2	2	0.6063	2	2	0.5784	0.469667	0.212951	1	1	0.7818	3	3	0.8419	6	6	1.3443	0.989333	0.308875	2.10646
1390	CREM	cAMP responsive element modulator	CREM-2|ICER|hCREM-2	NP_001254491;NP_001254492;NP_001254493;NP_001254494;NP_001254495;NP_001254496;NP_001254497;NP_001254498;NP_001254499;NP_001872;NP_853549;NP_874386;NP_874387;NP_874388;NP_874389;NP_874390;NP_874392;NP_874393;NP_877570;NP_877571;NP_877572;NP_877573;NP_898829;NP_898830;NP_898831;NP_898883	1	1	0.4038	1	1	0.4197	0	0	0.2225	0.348667	0.109552	1	2	1.1293	2	3	0.8419	0	0	0.2317	0.7343	0.458372	2.10602
10765	KDM5B	lysine (K)-specific demethylase 5B	CT31|JARID1B|PLU-1|PLU1|PPP1R98|PUT1|RBBP2H1A|RBP2-H1	NP_001300971;NP_006609	0	0	0.2243	0	0	0.2332	1	1	0.4004	0.285967	0.099202	2	2	1.1293	1	1	0.4457	0	0	0.2317	0.602233	0.468827	2.10596
8242	KDM5C	lysine (K)-specific demethylase 5C	DXS1272E|JARID1C|MRX13|MRXJ|MRXSCJ|MRXSJ|SMCX|XE169	NP_001140174;NP_001269551;NP_004178	0	0	0.2243	0	0	0.2332	1	1	0.4004	0.285967	0.099202	2	2	1.1293	1	1	0.4457	0	0	0.2317	0.602233	0.468827	2.10596
5428	POLG	polymerase (DNA directed), gamma	MDP1|MIRAS|MTDPS4A|MTDPS4B|PEO|POLG1|POLGA|SANDO|SCAE	NP_001119603;NP_002684	0	0	0.2243	0	0	0.2332	1	1	0.4004	0.285967	0.099202	2	2	1.1293	1	1	0.4457	0	0	0.2317	0.602233	0.468827	2.10596
81704	DOCK8	dedicator of cytokinesis 8	HEL-205|MRD2|ZIR8	NP_001177387;NP_001180465;NP_982272	1	1	0.4038	2	2	0.6063	1	1	0.4004	0.470167	0.117907	2	2	1.1293	5	5	1.2381	2	2	0.6026	0.99	0.33988	2.10564
196374	KRT78	keratin 78, type II	CK-78|K5B|K78|Kb40	NP_001287743;NP_775487	2	5	1.1217	1	1	0.4197	1	1	0.4004	0.647267	0.410985	2	3	1.4768	7	7	1.6344	2	4	0.9734	1.36153	0.345246	2.10351
84816	RTN4IP1	reticulon 4 interacting protein 1	NIMP	NP_001305675;NP_116119	2	2	0.5833	0	0	0.2332	1	1	0.4004	0.405633	0.175109	1	1	0.7818	0	0	0.2476	6	7	1.5297	0.853033	0.644011	2.10297
552889	ATXN7L3B	ataxin 7 like 3B	lnc-SCA7	NP_001129734	1	1	0.4038	0	0	0.2332	0	0	0.2225	0.2865	0.101726	1	2	1.1293	1	1	0.4457	0	0	0.2317	0.602233	0.468827	2.10204
892	CCNC	cyclin C	CycC	NP_001013417;NP_005181	1	1	0.4038	0	0	0.2332	0	0	0.2225	0.2865	0.101726	2	2	1.1293	1	1	0.4457	0	0	0.2317	0.602233	0.468827	2.10204
11064	CNTRL	centriolin	CEP1|CEP110|FAN|bA165P4.1	NP_008949	1	1	0.4038	0	0	0.2332	0	0	0.2225	0.2865	0.101726	2	2	1.1293	1	1	0.4457	0	0	0.2317	0.602233	0.468827	2.10204
79443	FYCO1	FYVE and coiled-coil domain containing 1	CATC2|CTRCT18|RUFY3|ZFYVE7	NP_078789	1	1	0.4038	0	0	0.2332	0	0	0.2225	0.2865	0.101726	2	2	1.1293	1	1	0.4457	0	0	0.2317	0.602233	0.468827	2.10204
83737	ITCH	itchy E3 ubiquitin protein ligase	ADMFD|AIF4|AIP4|NAPP1	NP_001244066;NP_001244067;NP_001311126;NP_001311127;NP_113671	1	1	0.4038	0	0	0.2332	0	0	0.2225	0.2865	0.101726	2	2	1.1293	1	1	0.4457	0	0	0.2317	0.602233	0.468827	2.10204
146909	KIF18B	kinesin family member 18B	-	NP_001251503;NP_001252506	1	1	0.4038	0	0	0.2332	0	0	0.2225	0.2865	0.101726	2	2	1.1293	1	1	0.4457	0	0	0.2317	0.602233	0.468827	2.10204
5979	RET	ret proto-oncogene	CDHF12|CDHR16|HSCR1|MEN2A|MEN2B|MTC1|PTC|RET-ELE1|RET51	NP_065681;NP_066124	1	1	0.4038	0	0	0.2332	0	0	0.2225	0.2865	0.101726	2	2	1.1293	1	1	0.4457	0	0	0.2317	0.602233	0.468827	2.10204
9692	KIAA0391	KIAA0391	MRPP3|PRORP	NP_001243607;NP_001243608;NP_001243609;NP_001243610;NP_055487	1	1	0.4038	0	0	0.2332	1	1	0.4004	0.3458	0.0975293	2	2	1.1293	1	1	0.4457	2	2	0.6026	0.725867	0.358083	2.09909
10557	RPP38	ribonuclease P/MRP 38kDa subunit	-	NP_001091059;NP_001252530;NP_006405;NP_892117	1	1	0.4038	0	0	0.2332	1	1	0.4004	0.3458	0.0975293	2	2	1.1293	1	1	0.4457	2	2	0.6026	0.725867	0.358083	2.09909
7089	TLE2	transducin like enhancer of split 2	ESG|ESG2|GRG2	NP_001138233;NP_001138234;NP_001287775;NP_003251	0	0	0.2243	1	1	0.4197	2	2	0.5784	0.407467	0.177367	2	2	1.1293	1	2	0.6438	3	3	0.788	0.8537	0.249329	2.09514
178	AGL	amylo-alpha-1, 6-glucosidase, 4-alpha-glucanotransferase	GDE	NP_000019;NP_000633;NP_000634;NP_000635;NP_000636;NP_000637	8	8	1.6602	2	2	0.6063	3	3	0.7564	1.00763	0.570101	9	9	3.5625	5	5	1.2381	7	7	1.5297	2.1101	1.26624	2.09411
1471	CST3	cystatin C	ARMD11|HEL-S-2	NP_000090;NP_001275543	1	1	0.4038	1	1	0.4197	0	0	0.2225	0.348667	0.109552	1	2	1.1293	2	2	0.6438	1	1	0.4172	0.7301	0.36381	2.09398
8777	MPDZ	multiple PDZ domain protein	HYC2|MUPP1	NP_001248335;NP_001248336;NP_003820	1	1	0.4038	1	1	0.4197	0	0	0.2225	0.348667	0.109552	2	2	1.1293	2	2	0.6438	1	1	0.4172	0.7301	0.36381	2.09398
9203	ZMYM3	zinc finger, MYM-type 3	DXS6673E|MYM|XFIM|ZNF198L2|ZNF261	NP_001164633;NP_001164634;NP_005087;NP_963893	1	1	0.4038	1	1	0.4197	1	1	0.4004	0.407967	0.0103026	2	2	1.1293	2	2	0.6438	3	3	0.788	0.8537	0.249329	2.09257
10036	CHAF1A	chromatin assembly factor 1 subunit A	CAF-1|CAF1|CAF1B|CAF1P150|P150	NP_005474	3	3	0.7627	0	0	0.2332	1	1	0.4004	0.465433	0.270674	3	3	1.4768	3	3	0.8419	2	2	0.6026	0.973767	0.451772	2.09217
662	BNIP1	BCL2/adenovirus E1B 19kDa interacting protein 1	NIP1|SEC20|TRG-8	NP_001196;NP_053581;NP_053582;NP_053583	0	0	0.2243	0	0	0.2332	1	1	0.4004	0.285967	0.099202	2	2	1.1293	0	0	0.2476	1	1	0.4172	0.598033	0.46784	2.09127
348180	CTU2	cytosolic thiouridylase subunit 2 homolog (S. pombe)	C16orf84|NCS2|UPF0432	NP_001012777;NP_001012780;NP_001305436;NP_001305442	0	0	0.2243	0	0	0.2332	1	1	0.4004	0.285967	0.099202	2	2	1.1293	0	0	0.2476	1	1	0.4172	0.598033	0.46784	2.09127
4780	NFE2L2	nuclear factor, erythroid 2 like 2	HEBP1|NRF2	NP_001138884;NP_001138885;NP_001300829;NP_001300830;NP_001300831;NP_001300832;NP_001300833;NP_006155	0	0	0.2243	0	0	0.2332	1	1	0.4004	0.285967	0.099202	1	2	1.1293	0	0	0.2476	1	1	0.4172	0.598033	0.46784	2.09127
54974	THG1L	tRNA-histidine guanylyltransferase 1-like	ICF45|IHG-1	NP_001304753;NP_001304754;NP_001304755;NP_060342	0	0	0.2243	0	0	0.2332	1	1	0.4004	0.285967	0.099202	2	2	1.1293	0	0	0.2476	1	1	0.4172	0.598033	0.46784	2.09127
51567	TDP2	tyrosyl-DNA phosphodiesterase 2	AD022|EAP2|EAPII|TTRAP|dJ30M3.3|hTDP2	NP_057698	0	0	0.2243	1	1	0.4197	2	2	0.5784	0.407467	0.177367	3	3	1.4768	3	3	0.8419	0	0	0.2317	0.850133	0.622591	2.08639
54897	CASZ1	castor zinc finger 1	CAS11|CST|SRG|ZNF693|dJ734G22.1	NP_001073312;NP_060236	0	0	0.2243	1	1	0.4197	0	0	0.2225	0.288833	0.113337	2	2	1.1293	1	1	0.4457	0	0	0.2317	0.602233	0.468827	2.08505
1794	DOCK2	dedicator of cytokinesis 2	IMD40	NP_004937	0	0	0.2243	1	1	0.4197	0	0	0.2225	0.288833	0.113337	2	2	1.1293	1	1	0.4457	0	0	0.2317	0.602233	0.468827	2.08505
4149	MAX	MYC associated factor X	bHLHd4	NP_001257997;NP_001257998;NP_001307344;NP_002373;NP_660087;NP_660088;NP_660089;NP_932061	0	0	0.2243	1	1	0.4197	0	0	0.2225	0.288833	0.113337	2	2	1.1293	1	1	0.4457	0	0	0.2317	0.602233	0.468827	2.08505
4437	MSH3	mutS homolog 3	DUP|MRP1	NP_002430	0	0	0.2243	1	1	0.4197	0	0	0.2225	0.288833	0.113337	2	2	1.1293	1	1	0.4457	0	0	0.2317	0.602233	0.468827	2.08505
200185	KRTCAP2	keratinocyte associated protein 2	KCP2	NP_776251	0	0	0.2243	1	1	0.4197	1	1	0.4004	0.348133	0.107676	1	2	1.1293	1	1	0.4457	2	2	0.6026	0.725867	0.358083	2.08502
55471	NDUFAF7	NADH:ubiquinone oxidoreductase complex assembly factor 7	C2orf56|MidA|PRO1853	NP_001077415;NP_653337	0	0	0.2243	2	2	0.6063	1	1	0.4004	0.410333	0.191194	2	2	1.1293	2	2	0.6438	3	3	0.788	0.8537	0.249329	2.0805
9144	SYNGR2	synaptogyrin 2	-	NP_001307452;NP_004701	0	0	0.2243	1	1	0.4197	2	2	0.5784	0.407467	0.177367	3	3	1.4768	2	2	0.6438	1	1	0.4172	0.845933	0.557971	2.07608
9630	GNA14	guanine nucleotide binding protein (G protein), alpha 14	-	NP_004288	3	3	0.7627	1	1	0.4197	2	2	0.5784	0.586933	0.171659	4	4	1.8244	2	4	1.04	3	3	0.788	1.21747	0.540511	2.07428
64848	YTHDC2	YTH domain containing 2	CAHL	NP_073739	2	2	0.5833	0	0	0.2332	0	0	0.2225	0.346333	0.205289	2	3	1.4768	1	1	0.4457	0	0	0.2317	0.718067	0.665737	2.07334
59272	ACE2	angiotensin I converting enzyme 2	ACEH	NP_068576	0	0	0.2243	1	1	0.4197	0	0	0.2225	0.288833	0.113337	2	2	1.1293	0	0	0.2476	1	1	0.4172	0.598033	0.46784	2.07051
2053	EPHX2	epoxide hydrolase 2	CEH|SEH	NP_001243411;NP_001243412;NP_001243413;NP_001970	0	0	0.2243	1	1	0.4197	0	0	0.2225	0.288833	0.113337	2	2	1.1293	0	0	0.2476	1	1	0.4172	0.598033	0.46784	2.07051
51168	MYO15A	myosin XVA	DFNB3|MYO15	NP_057323	0	0	0.2243	1	1	0.4197	0	0	0.2225	0.288833	0.113337	2	2	1.1293	0	0	0.2476	1	1	0.4172	0.598033	0.46784	2.07051
8079	MLF2	myeloid leukemia factor 2	NTN4	NP_005430	0	0	0.2243	2	2	0.6063	0	0	0.2225	0.351033	0.221069	2	2	1.1293	1	1	0.4457	2	2	0.6026	0.725867	0.358083	2.0678
23635	SSBP2	single-stranded DNA binding protein 2	HSPC116|SOSS-B2	NP_001243661;NP_001243662;NP_001243663;NP_001243664;NP_001243665;NP_036578	1	1	0.4038	2	2	0.6063	2	3	0.7564	0.588833	0.176948	3	4	1.8244	4	4	1.04	3	3	0.788	1.21747	0.540511	2.06759
3010	HIST1H1T	histone cluster 1, H1t	H1.6|H1FT|H1t|dJ221C16.2	NP_005314	3	8	1.6602	4	6	1.3526	3	7	1.4684	1.49373	0.155357	3	12	4.6057	2	7	1.6344	5	15	3.0136	3.08457	1.48692	2.065
1022	CDK7	cyclin-dependent kinase 7	CAK1|CDKN7|HCAK|MO15|STK1|p39MO15	NP_001310998;NP_001310999;NP_001311000;NP_001311001;NP_001311003;NP_001311004;NP_001311006;NP_001311007;NP_001790	2	2	0.5833	1	1	0.4197	1	1	0.4004	0.4678	0.10049	2	3	1.4768	1	1	0.4457	3	4	0.9734	0.9653	0.515598	2.06349
84779	NAA11	N(alpha)-acetyltransferase 11, NatA catalytic subunit	ARD1B|ARD2|hARD2	NP_116082	2	2	0.5833	0	0	0.2332	2	3	0.7564	0.5243	0.266543	3	4	1.8244	1	1	0.4457	3	4	0.9734	1.08117	0.695639	2.06211
79677	SMC6	structural maintenance of chromosomes 6	SMC-6|SMC6L1|hSMC6	NP_001135758;NP_078900	2	2	0.5833	0	0	0.2332	0	0	0.2225	0.346333	0.205289	3	3	1.4768	0	0	0.2476	1	1	0.4172	0.713867	0.666139	2.06121
79879	CCDC134	coiled-coil domain containing 134	-	NP_001291726;NP_079097	2	2	0.5833	1	1	0.4197	0	0	0.2225	0.4085	0.180661	3	3	1.4768	1	1	0.4457	2	2	0.6026	0.8417	0.555579	2.06047
10589	DRAP1	DR1 associated protein 1	NC2-alpha	NP_006433	2	2	0.5833	0	0	0.2332	1	1	0.4004	0.405633	0.175109	3	4	1.8244	1	1	0.4457	0	0	0.2317	0.833933	0.864417	2.05588
23637	RABGAP1	RAB GTPase activating protein 1	GAPCENA|TBC1D11	NP_036329	5	5	1.1217	2	2	0.6063	3	3	0.7564	0.828133	0.265082	7	7	2.8672	7	7	1.6344	2	2	0.6026	1.7014	1.13379	2.0545
8120	AP3B2	adaptor related protein complex 3 beta 2 subunit	NAPTB	NP_001265440;NP_001265441;NP_004635	1	1	0.4038	1	1	0.4197	2	2	0.5784	0.4673	0.0965433	4	4	1.8244	1	1	0.4457	2	2	0.6026	0.957567	0.754788	2.04915
389203	SMIM20	small integral membrane protein 20	C4orf52	NP_001138904	1	1	0.4038	1	1	0.4197	2	2	0.5784	0.4673	0.0965433	1	4	1.8244	1	1	0.4457	2	2	0.6026	0.957567	0.754788	2.04915
4440	MSI1	musashi RNA binding protein 1	-	NP_002433	1	1	0.4038	1	1	0.4197	0	0	0.2225	0.348667	0.109552	3	3	1.4768	0	0	0.2476	1	1	0.4172	0.713867	0.666139	2.04742
5092	PCBD1	pterin-4 alpha-carbinolamine dehydratase/dimerization cofactor of hepatocyte nuclear factor 1 alpha	DCOH|PCBD|PCD|PHS	NP_000272;NP_001276726;NP_001309933	2	2	0.5833	1	1	0.4197	1	1	0.4004	0.4678	0.10049	3	4	1.8244	1	1	0.4457	2	2	0.6026	0.957567	0.754788	2.04696
5331	PLCB3	phospholipase C beta 3	-	NP_000923;NP_001171812;NP_001303243	8	8	1.6602	0	0	0.2332	6	6	1.2904	1.06127	0.74058	9	9	3.5625	12	12	2.6252	0	0	0.2317	2.1398	1.71763	2.01627
10427	SEC24B	SEC24 homolog B, COPII coat complex component	SEC24	NP_001036199;NP_001287742;NP_001305014;NP_001305015;NP_006314	2	2	0.5833	0	0	0.2332	3	3	0.7564	0.5243	0.266543	1	2	1.1293	6	6	1.4363	2	2	0.6026	1.05607	0.421647	2.01424
23368	PPP1R13B	protein phosphatase 1 regulatory subunit 13B	ASPP1|p53BP2-like|p85	NP_056131	2	2	0.5833	0	0	0.2332	1	1	0.4004	0.405633	0.175109	1	1	0.7818	6	6	1.4363	0	0	0.2317	0.8166	0.603054	2.01315
1475	CSTA	cystatin A	AREI|STF1|STFA	NP_005204	2	2	0.5833	0	0	0.2332	0	0	0.2225	0.346333	0.205289	0	0	0.4343	4	5	1.2381	1	1	0.4172	0.696533	0.469088	2.01116
2801	GOLGA2	golgin A2	GM130	NP_004477	3	3	0.7627	1	1	0.4197	4	4	0.9344	0.7056	0.262058	4	4	1.8244	7	7	1.6344	3	3	0.788	1.4156	0.551757	2.00624
7750	ZMYM2	zinc finger, MYM-type 2	FIM|MYM|RAMP|SCLL|ZNF198	NP_001177893;NP_001177894;NP_003444;NP_932072	11	11	2.1988	0	0	0.2332	2	2	0.5784	1.00347	1.04948	3	3	1.4768	13	14	3.0216	7	7	1.5297	2.00937	0.877019	2.00242
55833	UBAP2	ubiquitin associated protein 2	UBAP-2	NP_001269458;NP_001269459;NP_060919	4	4	0.9422	2	2	0.6063	1	1	0.4004	0.649633	0.273487	3	3	1.4768	7	7	1.6344	3	3	0.788	1.29973	0.450125	2.00072
80205	CHD9	chromodomain helicase DNA binding protein 9	AD013|CHD-9|CReMM|KISH2|PRIC320	NP_001295248;NP_079410	9	10	2.0193	10	11	2.2857	7	7	1.4684	1.92447	0.416821	4	4	1.8244	1	1	0.4457	2	2	0.6026	0.957567	0.754788	0.497575
65267	WNK3	WNK lysine deficient protein kinase 3	PRKWNK3	NP_001002838;NP_065973	2	3	0.7627	3	3	0.7929	7	7	1.4684	1.008	0.399004	0	0	0.4343	2	2	0.6438	1	1	0.4172	0.498433	0.126181	0.494478
5531	PPP4C	protein phosphatase 4 catalytic subunit	PP-X|PP4|PP4C|PPH3|PPP4|PPX	NP_001290432;NP_001290433;NP_001290435;NP_001290436;NP_002711	7	10	2.0193	6	7	1.5392	6	6	1.2904	1.6163	0.370516	1	1	0.7818	1	1	0.4457	5	5	1.1589	0.795467	0.356796	0.492153
23358	USP24	ubiquitin specific peptidase 24	-	NP_056121	7	7	1.4807	6	6	1.3526	16	17	3.2488	2.02737	1.05973	1	1	0.7818	5	5	1.2381	4	4	0.9734	0.997767	0.229124	0.492149
7803	PTP4A1	protein tyrosine phosphatase type IVA, member 1	HH72|PRL-1|PRL1|PTP(CAAX1)|PTPCAAX1	NP_003454	6	6	1.3012	5	6	1.3526	4	5	1.1124	1.2554	0.12648	0	0	0.4343	1	1	0.4457	4	4	0.9734	0.6178	0.308011	0.492114
23475	QPRT	quinolinate phosphoribosyltransferase	HEL-S-90n|QPRTase	NP_001305178;NP_001305179;NP_055113	5	6	1.3012	7	8	1.7259	8	9	1.8244	1.61717	0.278032	1	1	0.7818	1	1	0.4457	5	5	1.1589	0.795467	0.356796	0.491889
8541	PPFIA3	protein tyrosine phosphatase, receptor type, f polypeptide (PTPRF), interacting protein (liprin), alpha 3	LPNA3	NP_003651	1	1	0.4038	2	3	0.7929	4	7	1.4684	0.888367	0.538682	0	0	0.4343	2	2	0.6438	0	0	0.2317	0.4366	0.20606	0.491464
80005	DOCK5	dedicator of cytokinesis 5	-	NP_001309739;NP_079216	6	6	1.3012	5	5	1.1661	2	2	0.5784	1.01523	0.384292	0	0	0.4343	2	2	0.6438	1	1	0.4172	0.498433	0.126181	0.490954
100302736	TMED7-TICAM2	TMED7-TICAM2 readthrough	-	NP_001157940;NP_001157941	8	8	1.6602	8	11	2.2857	7	10	2.0024	1.98277	0.313212	3	3	1.4768	2	2	0.6438	3	3	0.788	0.969533	0.445183	0.48898
84726	PRRC2B	proline rich coiled-coil 2B	BAT2L|BAT2L1|KIAA0515|LQFBS-1	NP_037450	16	16	3.0965	18	18	3.5923	16	17	3.2488	3.31253	0.25397	3	3	1.4768	9	9	2.0307	6	6	1.3443	1.61727	0.364121	0.488227
6636	SNRPF	small nuclear ribonucleoprotein polypeptide F	SMF|Sm-F|snRNP-F	NP_003086	2	4	0.9422	5	11	2.2857	5	11	2.1805	1.8028	0.747155	0	0	0.4343	1	4	1.04	3	5	1.1589	0.877733	0.388599	0.486872
78989	COLEC11	collectin subfamily member 11	3MC2|CL-K1-I|CL-K1-II|CL-K1-IIa|CL-K1-IIb|CLK1	NP_001242911;NP_001242912;NP_001242913;NP_001242914;NP_001242915;NP_001242916;NP_001242917;NP_001242918;NP_076932;NP_954705	4	4	0.9422	0	0	0.2332	4	5	1.1124	0.7626	0.466305	0	0	0.4343	1	1	0.4457	0	0	0.2317	0.370567	0.120397	0.485925
255252	LRRC57	leucine rich repeat containing 57	-	NP_694992	4	4	0.9422	0	0	0.2332	7	7	1.4684	0.881267	0.61985	0	0	0.4343	0	0	0.2476	2	2	0.6026	0.428167	0.177579	0.485854
633	BGN	biglycan	DSPG1|PG-S1|PGI|SLRR1A	NP_001702	5	6	1.3012	6	7	1.5392	6	9	1.8244	1.55493	0.261955	0	0	0.4343	3	4	1.04	2	3	0.788	0.7541	0.30427	0.484973
285527	FRYL	FRY like transcription coactivator	AF4p12|KIAA0826	NP_055845	13	13	2.5579	1	1	0.4197	4	4	0.9344	1.304	1.11599	0	0	0.4343	4	4	1.04	1	1	0.4172	0.6305	0.35474	0.483512
55636	CHD7	chromodomain helicase DNA binding protein 7	CRG|HH5|IS3|KAL5	NP_001303619;NP_060250	27	31	5.7907	20	22	4.3391	9	9	1.8244	3.98473	2.00676	9	9	3.5625	4	4	1.04	5	5	1.1589	1.92047	1.42328	0.481956
6168	RPL37A	ribosomal protein L37a	L37A	NP_000989	6	10	2.0193	6	13	2.659	6	7	1.4684	2.0489	0.595852	1	1	0.7818	2	2	0.6438	5	7	1.5297	0.9851	0.476658	0.480795
115708	TRMT61A	tRNA methyltransferase 61A	C14orf172|GCD14|Gcd14p|TRM61|hTRM61	NP_689520	3	3	0.7627	2	2	0.6063	3	4	0.9344	0.7678	0.164109	0	0	0.4343	0	0	0.2476	1	1	0.4172	0.366367	0.10321	0.477164
1537	CYC1	cytochrome c1	MC3DN6|UQCR4	NP_001907	8	13	2.5579	7	12	2.4723	7	14	2.7146	2.5816	0.122876	2	2	1.1293	3	3	0.8419	5	8	1.7152	1.2288	0.445071	0.475984
3094	HINT1	histidine triad nucleotide binding protein 1	HINT|NMAN|PKCI-1|PRKCNH1	NP_005331	8	22	4.174	11	23	4.5258	10	24	4.4955	4.39843	0.194955	4	5	2.172	7	8	1.8326	7	11	2.2716	2.09207	0.230157	0.475639
29123	ANKRD11	ankyrin repeat domain 11	ANCO-1|ANCO1|LZ16|T13	NP_001243111;NP_001243112;NP_037407	8	9	1.8397	4	4	0.9795	0	0	0.2225	1.0139	0.809149	1	1	0.7818	0	0	0.2476	1	1	0.4172	0.4822	0.272967	0.475589
196528	ARID2	AT-rich interaction domain 2	BAF200|p200	NP_689854	10	10	2.0193	6	6	1.3526	2	2	0.5784	1.31677	0.721118	0	0	0.4343	2	2	0.6438	3	3	0.788	0.622033	0.177852	0.472395
3958	LGALS3	lectin, galactoside-binding, soluble, 3	CBP35|GAL3|GALBP|GALIG|L31|LGALS2|MAC2	NP_001170859;NP_002297	4	7	1.4807	5	7	1.5392	6	6	1.2904	1.43677	0.130088	0	0	0.4343	0	0	0.2476	5	6	1.3443	0.6754	0.586758	0.470083
7123	CLEC3B	C-type lectin domain family 3 member B	TN|TNA	NP_001295323;NP_003269	1	1	0.4038	2	2	0.6063	4	4	0.9344	0.648167	0.267766	0	0	0.4343	0	0	0.2476	0	0	0.2317	0.304533	0.112662	0.469838
4152	MBD1	methyl-CpG binding domain protein 1	CXXC3|PCM1|RFT	NP_001191065;NP_001191066;NP_001191067;NP_001191068;NP_001191069;NP_001191070;NP_001191071;NP_001191072;NP_001191080;NP_001310871;NP_001310876;NP_001310878;NP_001310879;NP_001310880;NP_001310881;NP_001310882;NP_002375;NP_056669;NP_056670;NP_056671;NP_056723;NP_001310883	1	4	0.9422	1	2	0.6063	1	1	0.4004	0.649633	0.273487	0	0	0.4343	0	0	0.2476	0	0	0.2317	0.304533	0.112662	0.468777
22924	MAPRE3	microtubule associated protein RP/EB family member 3	EB3|EBF3|EBF3-S|RP3	NP_001289979;NP_036458	5	6	1.3012	4	6	1.3526	7	8	1.6464	1.4334	0.186245	1	1	0.7818	1	1	0.4457	3	3	0.788	0.671833	0.195862	0.468699
132789	GNPDA2	glucosamine-6-phosphate deaminase 2	GNP2|SB52	NP_001257809;NP_001257810;NP_612208	7	8	1.6602	4	4	0.9795	8	8	1.6464	1.4287	0.38908	1	1	0.7818	0	0	0.2476	4	4	0.9734	0.6676	0.376135	0.467278
10007	GNPDA1	glucosamine-6-phosphate deaminase 1	GNP1|GNPDA|GNPI|GPI|HLN	NP_005462	15	15	2.917	9	9	1.9125	13	13	2.5365	2.45533	0.507145	3	3	1.4768	0	0	0.2476	8	8	1.7152	1.14653	0.787572	0.466956
222068	TMED4	transmembrane p24 trafficking protein 4	ERS25|GMP25iso|HNLF|p24alpha3	NP_001289987;NP_001289988;NP_001289989;NP_001289990;NP_001289991;NP_872353	4	5	1.1217	4	7	1.5392	4	6	1.2904	1.3171	0.210027	0	0	0.4343	0	0	0.2476	4	5	1.1589	0.6136	0.481382	0.465872
10328	EMC8	ER membrane protein complex subunit 8	C16orf2|C16orf4|COX4NB|FAM158B|NOC4	NP_001135760;NP_006058	5	5	1.1217	4	4	0.9795	6	7	1.4684	1.18987	0.251477	1	1	0.7818	1	1	0.4457	1	1	0.4172	0.548233	0.202776	0.460752
546	ATRX	alpha thalassemia/mental retardation syndrome X-linked	ATR2|JMS|MRX52|MRXHF1|RAD54|RAD54L|SFM1|SHS|XH2|XNP|ZNF-HX	NP_000480;NP_612114	27	28	5.2517	19	23	4.5258	16	16	3.0707	4.28273	1.11063	6	6	2.5196	10	10	2.2289	5	5	1.1589	1.96913	0.716579	0.459784
4298	MLLT1	myeloid/lymphoid or mixed-lineage leukemia; translocated to, 1	ENL|LTG19|YEATS1	NP_005925	8	9	1.8397	5	5	1.1661	2	2	0.5784	1.19473	0.631137	1	1	0.7818	1	1	0.4457	1	1	0.4172	0.548233	0.202776	0.458875
7388	UQCRH	ubiquinol-cytochrome c reductase hinge protein	QCR6|UQCR8	NP_001284494;NP_001284495;NP_005995	3	4	0.9422	3	3	0.7929	5	5	1.1124	0.949167	0.159864	0	0	0.4343	0	0	0.2476	2	2	0.6026	0.428167	0.177579	0.451097
134147	CMBL	carboxymethylenebutenolidase homolog (Pseudomonas)	JS-1	NP_620164	4	4	0.9422	2	2	0.6063	3	4	0.9344	0.827633	0.19172	0	0	0.4343	1	1	0.4457	0	0	0.2317	0.370567	0.120397	0.447743
89796	NAV1	neuron navigator 1	POMFIL3|STEERIN1|UNC53H1	NP_001161210;NP_065176	18	18	3.4557	15	15	3.0323	3	3	0.7564	2.4148	1.45174	1	1	0.7818	9	9	2.0307	1	1	0.4172	1.07657	0.846174	0.44582
27032	ATP2C1	ATPase, Ca++ transporting, type 2C, member 1	ATP2C1A|BCPM|HHD|PMR1|SPCA1|hSPCA1	NP_001001485;NP_001001486;NP_001001487;NP_001186108;NP_001186109;NP_001186110;NP_001186111;NP_001186112;NP_001186113;NP_001186114;NP_055197	2	2	0.5833	6	6	1.3526	2	2	0.5784	0.8381	0.445577	0	0	0.4343	1	1	0.4457	0	0	0.2317	0.370567	0.120397	0.442151
384	ARG2	arginase 2	-	NP_001163	8	9	1.8397	3	3	0.7929	5	5	1.1124	1.24833	0.536476	1	1	0.7818	0	0	0.2476	2	2	0.6026	0.544	0.271878	0.435781
2273	FHL1	four and a half LIM domains 1	FHL-1|FHL1A|FHL1B|FLH1A|KYOT|SLIM|SLIM-1|SLIM1|SLIMMER|XMPMA	NP_001153171;NP_001153172;NP_001153173;NP_001153174;NP_001153175;NP_001153176;NP_001161291;NP_001440	13	14	2.7374	12	14	2.8456	13	17	3.2488	2.94393	0.269508	3	4	1.8244	1	4	1.04	3	4	0.9734	1.27927	0.473272	0.434543
4817	NIT1	nitrilase 1	-	NP_001172021;NP_001172022;NP_001172023;NP_005591	6	7	1.4807	4	4	0.9795	9	11	2.1805	1.5469	0.603231	1	1	0.7818	1	1	0.4457	3	3	0.788	0.671833	0.195862	0.434309
23195	MDN1	midasin AAA ATPase 1	Rea1	NP_055426	67	74	13.5221	60	67	12.748	28	31	5.7424	10.6708	4.28566	22	23	8.4325	12	13	2.8234	11	13	2.6426	4.63283	3.29185	0.434159
3698	ITIH2	inter-alpha-trypsin inhibitor heavy chain 2	H2P|SHAP	NP_002207	2	2	0.5833	2	2	0.6063	7	14	2.7146	1.3014	1.22392	0	0	0.4343	3	3	0.8419	1	1	0.4172	0.564467	0.240416	0.433738
4257	MGST1	microsomal glutathione S-transferase 1	GST12|MGST|MGST-I	NP_001247440;NP_001247441;NP_001254527;NP_064696;NP_665707;NP_665734;NP_665735	4	7	1.4807	5	10	2.0991	4	7	1.4684	1.68273	0.360637	1	1	0.7818	0	0	0.2476	4	5	1.1589	0.729433	0.457901	0.433481
1410	CRYAB	crystallin alpha B	CMD1II|CRYA2|CTPP2|CTRCT16|HEL-S-101|HSPB5|MFM2	NP_001276736;NP_001276737;NP_001876	4	4	0.9422	1	1	0.4197	3	3	0.7564	0.7061	0.264857	0	0	0.4343	0	0	0.2476	0	0	0.2317	0.304533	0.112662	0.431289
2312	FLG	filaggrin	ATOD2	NP_002007	8	12	2.3783	2	2	0.6063	1	1	0.4004	1.12833	1.08739	1	1	0.7818	1	1	0.4457	0	0	0.2317	0.4864	0.277299	0.431078
26509	MYOF	myoferlin	FER1L3	NP_038479;NP_579899	13	13	2.5579	13	13	2.659	4	4	0.9344	2.05043	0.967834	0	0	0.4343	5	5	1.2381	4	4	0.9734	0.881933	0.409632	0.43012
8655	DYNLL1	dynein, light chain, LC8-type 1	DLC1|DLC8|DNCL1|DNCLC1|LC8|LC8a|PIN|hdlc1	NP_001032583;NP_001032584;NP_003737	8	11	2.1988	4	5	1.1661	9	9	1.8244	1.72977	0.522813	0	0	0.4343	1	1	0.4457	5	6	1.3443	0.741433	0.522129	0.428632
643314	KIAA0754	KIAA0754	-	NP_055853	5	5	1.1217	3	3	0.7929	0	0	0.2225	0.712367	0.454977	0	0	0.4343	0	0	0.2476	0	0	0.2317	0.304533	0.112662	0.427495
2022	ENG	endoglin	END|HHT1|ORW1	NP_000109;NP_001108225;NP_001265067	7	7	1.4807	8	9	1.9125	10	10	2.0024	1.79853	0.278898	0	0	0.4343	5	6	1.4363	1	1	0.4172	0.7626	0.583504	0.424012
8085	KMT2D	lysine (K)-specific methyltransferase 2D	AAD10|ALR|CAGL114|KABUK1|KMS|MLL2|MLL4|TNRC21	NP_003473	21	21	3.9944	12	12	2.4723	8	8	1.6464	2.70437	1.19108	5	5	2.172	3	3	0.8419	1	1	0.4172	1.1437	0.915502	0.422909
6827	SUPT4H1	SPT4 homolog, DSIF elongation factor subunit	SPT4|SPT4H|SUPT4H	NP_003159	3	4	0.9422	4	5	1.1661	3	4	0.9344	1.01423	0.131578	0	0	0.4343	0	0	0.2476	2	2	0.6026	0.428167	0.177579	0.422158
54539	NDUFB11	NADH:ubiquinone oxidoreductase subunit B11	CI-ESSS|ESSS|LSDMCA3|NP17.3|Np15|P17.3	NP_001129470;NP_061929	4	6	1.3012	3	6	1.3526	4	9	1.8244	1.49273	0.288379	0	0	0.4343	2	2	0.6438	2	3	0.788	0.622033	0.177852	0.416708
9612	NCOR2	nuclear receptor corepressor 2	CTG26|N-CoR2|SMAP270|SMRT|SMRTE|SMRTE-tau|TNRC14|TRAC|TRAC-1|TRAC1	NP_001070729;NP_001193583;NP_006303	37	38	7.0485	4	4	0.9795	15	15	2.8927	3.64023	3.10279	2	2	1.1293	9	10	2.2289	5	5	1.1589	1.5057	0.626484	0.413627
56897	WRNIP1	Werner helicase interacting protein 1	WHIP|bA420G6.2	NP_064520;NP_569079	3	3	0.7627	6	6	1.3526	2	2	0.5784	0.8979	0.40442	0	0	0.4343	1	1	0.4457	0	0	0.2317	0.370567	0.120397	0.412704
9801	MRPL19	mitochondrial ribosomal protein L19	L19mt|MRP-L15|MRP-L19|MRPL15|RLX1|RPML15	NP_055578	9	10	2.0193	8	8	1.7259	15	15	2.8927	2.21263	0.60695	2	2	1.1293	1	1	0.4457	5	5	1.1589	0.9113	0.403493	0.411862
51170	HSD17B11	hydroxysteroid (17-beta) dehydrogenase 11	17-BETA-HSD11|17-BETA-HSDXI|17BHSD11|DHRS8|PAN1B|RETSDR2|SDR16C2	NP_057329	8	9	1.8397	9	10	2.0991	11	12	2.3585	2.0991	0.2594	1	1	0.7818	1	1	0.4457	5	6	1.3443	0.857267	0.454029	0.408397
28972	SPCS1	signal peptidase complex subunit 1	HSPC033|SPC1|SPC12|YJR010C-A	NP_054760	4	13	2.5579	3	5	1.1661	2	4	0.9344	1.5528	0.878118	0	0	0.4343	2	3	0.8419	2	2	0.6026	0.626267	0.204828	0.403314
3064	HTT	huntingtin	HD|IT15	NP_002102	20	20	3.8148	10	10	2.0991	11	11	2.1805	2.69813	0.967918	4	4	1.8244	2	2	0.6438	3	3	0.788	1.0854	0.644041	0.402278
7555	CNBP	CCHC-type zinc finger, nucleic acid binding protein	CNBP1|DM2|PROMM|RNF163|ZCCHC22|ZNF9	NP_001120664;NP_001120665;NP_001120666;NP_001120667;NP_001120668;NP_003409	9	19	3.6352	10	12	2.4723	9	10	2.0024	2.7033	0.840553	2	3	1.4768	0	0	0.2476	6	7	1.5297	1.0847	0.725432	0.40125
11342	RNF13	ring finger protein 13	RZF	NP_009213;NP_899237	3	3	0.7627	0	0	0.2332	4	6	1.2904	0.7621	0.5286	0	0	0.4343	0	0	0.2476	0	0	0.2317	0.304533	0.112662	0.399598
463	ZFHX3	zinc finger homeobox 3	ATBF1|ATBT|ZNF927	NP_001158238;NP_008816	14	14	2.7374	10	10	2.0991	4	4	0.9344	1.92363	0.914218	4	4	1.8244	0	0	0.2476	0	0	0.2317	0.7679	0.91499	0.399193
2638	GC	group-specific component (vitamin D binding protein)	DBP|DBP/GC|GRD3|Gc-MAF|GcMAF|HEL-S-51|VDBG|VDBP	NP_000574;NP_001191235;NP_001191236	3	7	1.4807	5	8	1.7259	6	13	2.5365	1.91437	0.552556	0	0	0.4343	4	5	1.2381	2	2	0.6026	0.758333	0.423926	0.396128
23001	WDFY3	WD repeat and FYVE domain containing 3	ALFY|ZFYVE25	NP_055806	4	4	0.9422	4	4	0.9795	1	1	0.4004	0.774033	0.324113	0	0	0.4343	0	0	0.2476	0	0	0.2317	0.304533	0.112662	0.393437
54331	GNG2	guanine nucleotide binding protein (G protein), gamma 2	-	NP_001230702;NP_001230703;NP_444292	5	10	2.0193	4	7	1.5392	5	8	1.6464	1.73497	0.252006	1	1	0.7818	2	3	0.8419	1	1	0.4172	0.6803	0.229824	0.392111
55847	CISD1	CDGSH iron sulfur domain 1	C10orf70|MDS029|ZCD1|mitoNEET	NP_060934	5	12	2.3783	5	12	2.4723	5	12	2.3585	2.40303	0.0607981	0	0	0.4343	2	2	0.6438	4	8	1.7152	0.9311	0.687082	0.387469
9553	MRPL33	mitochondrial ribosomal protein L33	C2orf1|L33mt|MRP-L33|RPL33L	NP_004882;NP_663303	3	4	0.9422	3	4	0.9795	3	4	0.9344	0.952033	0.0241044	0	0	0.4343	0	0	0.2476	1	1	0.4172	0.366367	0.10321	0.384825
8567	MADD	MAP kinase activating death domain	DENN|IG20|RAB3GEP	NP_001129415;NP_001129416;NP_003673;NP_569826;NP_569827;NP_569828;NP_569829;NP_569830;NP_569831;NP_569832	4	4	0.9422	8	8	1.7259	0	0	0.2225	0.963533	0.751927	0	0	0.4343	1	1	0.4457	0	0	0.2317	0.370567	0.120397	0.384591
4288	MKI67	marker of proliferation Ki-67	KIA|MIB-|MIB-1|PPP1R105	NP_001139438;NP_002408	121	154	27.9379	129	165	31.1098	67	80	14.48	24.5092	8.82918	19	19	7.0406	49	57	11.5514	43	48	9.139	9.24367	2.25722	0.37715
1063	CENPF	centromere protein F	CENF|CILD31|PRO1779|hcp-1	NP_057427	97	107	19.4636	96	107	20.2345	50	51	9.307	16.335	6.09865	27	31	11.2175	19	19	4.0127	14	14	2.8281	6.01943	4.54046	0.368498
8775	NAPA	NSF attachment protein alpha	SNAPA	NP_003818	14	19	3.6352	19	21	4.1524	17	22	4.1392	3.9756	0.294869	3	4	1.8244	2	3	0.8419	7	8	1.7152	1.4605	0.538498	0.367366
4069	LYZ	lysozyme	LZM	NP_000230	9	40	7.4079	1	1	0.4197	0	0	0.2225	2.68337	4.09275	0	0	0.4343	5	10	2.2289	0	0	0.2317	0.964967	1.09928	0.35961
4297	KMT2A	lysine (K)-specific methyltransferase 2A	ALL-1|CXXC7|HRX|HTRX1|MLL|MLL-AF9|MLL/GAS7|MLL1|MLL1A|TET1-MLL|TRX1|WDSTS	NP_001184033;NP_005924	15	15	2.917	13	14	2.8456	4	4	0.9344	2.23233	1.12461	3	3	1.4768	2	2	0.6438	0	0	0.2317	0.7841	0.634296	0.351247
23077	MYCBP2	MYC binding protein 2, E3 ubiquitin protein ligase	PAM	NP_055872	19	19	3.6352	21	21	4.1524	1	1	0.4004	2.72933	2.03343	4	4	1.8244	1	1	0.4457	2	2	0.6026	0.957567	0.754788	0.350843
83481	EPPK1	epiplakin 1	EPIPL|EPIPL1	NP_112598	16	18	3.4557	15	18	3.5923	7	8	1.6464	2.89813	1.08618	0	0	0.4343	6	6	1.4363	5	5	1.1589	1.00983	0.517365	0.348443
26278	SACS	sacsin molecular chaperone	ARSACS|DNAJC29|PPP1R138|SPAX6	NP_001264984;NP_055178	20	20	3.8148	22	23	4.5258	2	2	0.5784	2.973	2.10403	4	4	1.8244	2	2	0.6438	2	2	0.6026	1.0236	0.693819	0.344299
11214	AKAP13	A-kinase anchoring protein 13	AKAP-13|AKAP-Lbc|ARHGEF13|BRX|HA-3|Ht31|LBC|PRKA13|PROTO-LB|PROTO-LBC|c-lbc|p47	NP_001257475;NP_006729;NP_009131	40	41	7.5876	30	36	6.9537	13	13	2.5365	5.6926	2.75158	7	7	2.8672	8	8	1.8326	5	5	1.1589	1.9529	0.86048	0.343059
84320	ACBD6	acyl-CoA binding domain containing 6	-	NP_115736	4	4	0.9422	3	3	0.7929	4	4	0.9344	0.889833	0.0840373	0	0	0.4343	0	0	0.2476	0	0	0.2317	0.304533	0.112662	0.342236
8295	TRRAP	transformation/transcription domain-associated protein	PAF350/400|PAF400|STAF40|TR-AP|Tra1	NP_001231509;NP_003487	27	28	5.2517	35	35	6.7669	18	18	3.4269	5.1485	1.67239	7	8	3.2148	4	4	1.04	4	4	0.9734	1.74273	1.27528	0.338493
23049	SMG1	SMG1 phosphatidylinositol 3-kinase-related kinase	61E3.4|ATX|LIP	NP_055907	12	12	2.3783	17	17	3.4056	3	3	0.7564	2.1801	1.33567	2	2	1.1293	1	1	0.4457	1	2	0.6026	0.725867	0.358083	0.332951
2946	GSTM2	glutathione S-transferase mu 2 (muscle)	GST4|GSTM|GSTM2-2|GTHMUS	NP_000839;NP_001135840	5	6	1.3012	10	10	2.0991	7	8	1.6464	1.68223	0.400155	0	0	0.4343	1	1	0.4457	3	3	0.788	0.556	0.200999	0.330513
5116	PCNT	pericentrin	KEN|MOPD2|PCN|PCNT2|PCNTB|PCTN2|SCKL4	NP_001302458;NP_006022	9	9	1.8397	7	7	1.5392	3	3	0.7564	1.37843	0.559258	0	0	0.4343	1	1	0.4457	1	1	0.4172	0.4324	0.0143447	0.313689
23013	SPEN	spen family transcriptional repressor	HIAA0929|MINT|RBM15C|SHARP	NP_055816	45	47	8.6661	47	53	10.1304	16	16	3.0707	7.28907	3.72586	8	8	3.2148	10	11	2.4271	5	5	1.1589	2.26693	1.03727	0.311005
57448	BIRC6	baculoviral IAP repeat containing 6	APOLLON|BRUCE	NP_057336	30	31	5.7907	37	37	7.1405	12	12	2.3585	5.09657	2.46541	5	5	2.172	3	3	0.8419	7	8	1.7152	1.57637	0.675831	0.3093
3933	LCN1	lipocalin 1	PMFA|TLC|TP|VEGP	NP_001239546;NP_001239547;NP_001239548;NP_002288	7	19	3.6352	0	0	0.2332	0	0	0.2225	1.36363	1.96724	1	1	0.7818	0	0	0.2476	0	0	0.2317	0.420367	0.313111	0.30827
5930	RBBP6	retinoblastoma binding protein 6	MY038|P2P-R|PACT|RBQ-1|SNAMA	NP_008841;NP_061173;NP_116015	16	16	3.0965	14	15	3.0323	3	3	0.7564	2.29507	1.33291	0	0	0.4343	5	5	1.2381	1	1	0.4172	0.696533	0.469088	0.303492
4035	LRP1	LDL receptor related protein 1	A2MR|APOER|APR|CD91|IGFBP3R|LRP|LRP1A|TGFBR5	NP_002323	6	6	1.3012	9	9	1.9125	2	2	0.5784	1.26403	0.667826	0	0	0.4343	1	1	0.4457	0	0	0.2317	0.370567	0.120397	0.293162
448834	KPRP	keratinocyte proline rich protein	C1orf45	NP_001020402	9	13	2.5579	4	4	0.9795	4	4	0.9344	1.4906	0.924584	0	0	0.4343	2	2	0.6438	0	0	0.2317	0.4366	0.20606	0.292902
667	DST	dystonin	BP240|BPA|BPAG1|CATX-15|CATX15|D6S1101|DMH|DT|EBSB2|HSAN6|MACF2	NP_001138241;NP_001138242;NP_001714;NP_056363;NP_899236	80	82	14.9618	78	82	15.5541	21	21	3.9611	11.4923	6.52896	10	12	4.6057	12	12	2.6252	13	13	2.6426	3.29117	1.13845	0.286379
58499	ZNF462	zinc finger protein 462	Zfp462	NP_067047	12	12	2.3783	9	9	1.9125	4	4	0.9344	1.74173	0.736941	0	0	0.4343	2	2	0.6438	1	1	0.4172	0.498433	0.126181	0.286171
4130	MAP1A	microtubule associated protein 1A	MAP1L|MTAP1A	NP_002364	69	88	16.0418	74	94	17.8002	48	52	9.4853	14.4424	4.38211	6	6	2.5196	22	24	5.004	18	20	3.9412	3.8216	1.24651	0.264609
23269	MGA	MGA, MAX dimerization protein	MAD5|MXD5	NP_001074010;NP_001157745	20	20	3.8148	16	18	3.5923	1	1	0.4004	2.6025	1.91032	1	1	0.7818	3	3	0.8419	1	1	0.4172	0.6803	0.229824	0.261402
2195	FAT1	FAT atypical cadherin 1	CDHF7|CDHR8|FAT|ME5|hFat1	NP_005236	12	12	2.3783	4	4	0.9795	0	0	0.2225	1.19343	1.09371	0	0	0.4343	0	0	0.2476	0	0	0.2317	0.304533	0.112662	0.255174
2274	FHL2	four and a half LIM domains 2	AAG11|DRAL|FHL-2|SLIM-3|SLIM3	NP_001034581;NP_001305823;NP_001305824;NP_001305825;NP_001305826;NP_001305827;NP_001305828;NP_001441;NP_963849;NP_963851	9	9	1.8397	7	8	1.7259	7	8	1.6464	1.73733	0.0971559	0	0	0.4343	0	0	0.2476	2	2	0.6026	0.428167	0.177579	0.24645
23131	GPATCH8	G-patch domain containing 8	GPATC8|KIAA0553	NP_001002909;NP_001291868;NP_001291869;NP_001291870;NP_001291871;NP_001291872	18	19	3.6352	2	2	0.6063	1	1	0.4004	1.5473	1.8111	0	0	0.4343	1	1	0.4457	0	0	0.2317	0.370567	0.120397	0.239492
23152	CIC	capicua transcriptional repressor	-	NP_001291744;NP_055940	9	9	1.8397	6	8	1.7259	5	5	1.1124	1.55933	0.391216	0	0	0.4343	1	1	0.4457	0	0	0.2317	0.370567	0.120397	0.237644
8925	HERC1	HECT and RLD domain containing E3 ubiquitin protein ligase family member 1	p532|p619	NP_003913	11	11	2.1988	9	9	1.9125	2	2	0.5784	1.56323	0.86482	0	0	0.4343	1	1	0.4457	0	0	0.2317	0.370567	0.120397	0.237051
10142	AKAP9	A-kinase anchoring protein 9	AKAP-9|AKAP350|AKAP450|CG-NAP|HYPERION|LQT11|MU-RMS-40.16A|PPP1R45|PRKA9|YOTIAO	NP_005742;NP_671714	40	40	7.4079	46	46	8.8221	5	5	1.1124	5.7808	4.10432	5	5	2.172	6	6	1.4363	0	0	0.2317	1.28	0.979547	0.221423
2804	GOLGB1	golgin B1	GCP|GCP372|GOLIM1	NP_001243415;NP_001243416;NP_001243417;NP_004478	63	64	11.723	56	58	11.0651	19	19	3.605	8.7977	4.50903	11	11	4.2579	4	4	1.04	1	1	0.4172	1.90503	2.0613	0.216538
2186	BPTF	bromodomain PHD finger transcription factor	FAC1|FALZ|NURF301	NP_004450;NP_872579	42	43	7.9471	40	41	7.8878	19	19	3.605	6.47997	2.48997	4	4	1.8244	6	6	1.4363	3	3	0.788	1.34957	0.523616	0.208268
10847	SRCAP	Snf2-related CREBBP activator protein	DOMO1|EAF1|FLHS|SWR1	NP_006653	29	29	5.4314	17	17	3.4056	4	4	0.9344	3.25713	2.25217	1	1	0.7818	2	2	0.6438	1	2	0.6026	0.676067	0.0938563	0.207565
54832	VPS13C	vacuolar protein sorting 13 homolog C (S. cerevisiae)	-	NP_001018098;NP_060154;NP_060550;NP_065872	35	36	6.6891	38	42	8.0746	10	11	2.1805	5.64807	3.08187	2	3	1.4768	4	4	1.04	4	4	0.9734	1.1634	0.273448	0.205982
259282	BOD1L1	biorientation of chromosomes in cell division 1 like 1	BOD1L|FAM44A	NP_683692	59	61	11.1834	54	62	11.813	18	18	3.4269	8.80777	4.67059	5	5	2.172	11	11	2.4271	3	3	0.788	1.7957	0.881966	0.203877
57634	EP400	E1A binding protein p400	CAGH32|P400|TNRC12	NP_056224	39	43	7.9471	35	38	7.3273	12	12	2.3585	5.87763	3.06337	4	4	1.8244	5	5	1.2381	1	1	0.4172	1.1599	0.706852	0.197341
9857	CEP350	centrosomal protein 350kDa	CAP350|GM133	NP_055625	16	17	3.2761	15	16	3.219	1	1	0.4004	2.2985	1.64405	1	1	0.7818	0	0	0.2476	0	0	0.2317	0.420367	0.313111	0.182887
8924	HERC2	HECT and RLD domain containing E3 ubiquitin protein ligase 2	D15F37S1|MRT38|SHEP1|jdf2|p528	NP_004658	14	17	3.2761	22	22	4.3391	1	1	0.4004	2.67187	2.03769	1	1	0.7818	0	0	0.2476	0	0	0.2317	0.420367	0.313111	0.157331

## Sheet: Untreated vs MEV treated 72 h
					Untreated Rep 1			Untreated Rep 2			Untreated Rep 3			Untreated	Untreated	Treated - 72 h Rep 1			Treated - 72 h Rep 2			Treated - 72 h Rep 3			Treated - 72 h	Treated - 72 h	72 h/UT
Entrez ID	Gene Symbol	Gene Desc	Alternate names	Refseq	No. of peptides	No. of spectra	NSpC	No. of peptides	No. of spectra	NSpC	No. of peptides	No. of spectra	NSpC	Average NspC	SD	No. of peptides	No. of spectra	NSpC	No. of peptides	No. of spectra	NSpC	No. of peptides	No. of spectra	NSpC	Average NspC	SD	FOLD
92747	BPIFB1	BPI fold containing family B member 1	C20orf114|LPLUNC1	NP_149974	0	0	0.2243	0	0	0.2332	0	0	0.2225	0.226667	0.00572917	0	0	0.2322	0	0	0.2263	8	11	2.4061	0.954867	1.25681	4.21265
5284	PIGR	polymeric immunoglobulin receptor	-	NP_002635	0	0	0.2243	0	0	0.2332	0	0	0.2225	0.226667	0.00572917	0	0	0.2322	0	0	0.2263	7	10	2.2096	0.889367	1.14336	3.92368
4920	ROR2	receptor tyrosine kinase-like orphan receptor 2	BDB|BDB1|NTRKR2	NP_001305133;NP_004551	0	0	0.2243	0	0	0.2332	0	0	0.2225	0.226667	0.00572917	2	2	0.6037	4	4	0.9507	4	4	1.031	0.8618	0.227099	3.80206
6280	S100A9	S100 calcium binding protein A9	60B8AG|CAGB|CFAG|CGLB|L1AG|LIAG|MAC387|MIF|MRP14|NIF|P14	NP_002956	3	3	0.7627	0	0	0.2332	0	0	0.2225	0.406133	0.308842	6	12	2.4618	0	0	0.2263	4	7	1.6203	1.43613	1.12907	3.53611
9757	KMT2B	lysine (K)-specific methyltransferase 2B	CXXC10|HRX2|MLL1B|MLL2|MLL4|TRX2|WBP-7|WBP7	NP_055542	0	0	0.2243	0	0	0.2332	0	0	0.2225	0.226667	0.00572917	0	0	0.2322	1	1	0.4074	7	7	1.6203	0.7533	0.755937	3.32338
4684	NCAM1	neural cell adhesion molecule 1	CD56|MSK39|NCAM	NP_000606;NP_001070150;NP_001229536;NP_001229537;NP_851996	2	2	0.5833	2	2	0.6063	1	1	0.4004	0.53	0.112825	8	9	1.9043	3	4	0.9507	8	11	2.4061	1.7537	0.739295	3.30887
375449	MAST4	microtubule associated serine/threonine kinase family member 4	-	NP_001158136;NP_001277155;NP_001277156;NP_001277157;NP_001284580;NP_055998;NP_942123	0	0	0.2243	0	0	0.2332	0	0	0.2225	0.226667	0.00572917	1	1	0.418	3	3	0.7696	4	4	1.031	0.739533	0.307604	3.26265
54477	PLEKHA5	pleckstrin homology domain containing A5	PEPP-2|PEPP2	NP_001137293;NP_001177789;NP_001243399;NP_001243716;NP_061885	1	1	0.4038	0	0	0.2332	1	1	0.4004	0.3458	0.0975293	5	5	1.1611	1	1	0.4074	7	7	1.6203	1.06293	0.61238	3.07384
51297	BPIFA1	BPI fold containing family A member 1	LUNX|NASG|PLUNC|SPLUNC1|SPURT|bA49G10.5	NP_001230122;NP_057667;NP_570913	0	0	0.2243	0	0	0.2332	0	0	0.2225	0.226667	0.00572917	0	0	0.2322	0	0	0.2263	3	7	1.6203	0.692933	0.803129	3.05706
81553	FAM49A	family with sequence similarity 49 member A	-	NP_110424	1	1	0.4038	1	1	0.4197	1	1	0.4004	0.407967	0.0103026	2	6	1.3469	3	6	1.3129	3	4	1.031	1.23027	0.173405	3.01561
23327	NEDD4L	neural precursor cell expressed, developmentally down-regulated 4-like, E3 ubiquitin protein ligase	NEDD4-2|NEDD4.2|RSP5|hNEDD4-2	NP_001138436;NP_001138437;NP_001138438;NP_001138439;NP_001138440;NP_001138441;NP_001138442;NP_001138443;NP_001230889;NP_056092	0	0	0.2243	0	0	0.2332	0	0	0.2225	0.226667	0.00572917	4	4	0.9753	0	0	0.2263	3	3	0.8346	0.678733	0.398084	2.99441
25984	KRT23	keratin 23, type I	CK23|HAIK1|K23	NP_001269362;NP_056330	0	0	0.2243	0	0	0.2332	0	0	0.2225	0.226667	0.00572917	1	2	0.6037	2	2	0.5885	2	3	0.8346	0.6756	0.137908	2.98059
5096	PCCB	propionyl-CoA carboxylase beta subunit	-	NP_000523;NP_001171485	0	0	0.2243	0	0	0.2332	0	0	0.2225	0.226667	0.00572917	2	2	0.6037	2	2	0.5885	3	3	0.8346	0.6756	0.137908	2.98059
9659	PDE4DIP	phosphodiesterase 4D interacting protein	CMYA2|MMGL	NP_001002810;NP_001002811;NP_001002812;NP_001182189;NP_001182190;NP_001185761;NP_001185763;NP_055459;NP_071754	0	0	0.2243	0	0	0.2332	0	0	0.2225	0.226667	0.00572917	2	2	0.6037	2	2	0.5885	3	3	0.8346	0.6756	0.137908	2.98059
8500	PPFIA1	protein tyrosine phosphatase, receptor type, f polypeptide (PTPRF), interacting protein (liprin), alpha 1	LIP.1|LIP1|LIPRIN	NP_003617;NP_803172	2	2	0.5833	2	2	0.6063	2	2	0.5784	0.589333	0.0148964	14	14	2.8335	2	2	0.5885	8	8	1.8167	1.74623	1.12416	2.96307
4641	MYO1C	myosin IC	MMI-beta|MMIb|NMI|myr2	NP_001074248;NP_001074419;NP_203693	4	4	0.9422	3	3	0.7929	0	0	0.2225	0.652533	0.379828	10	10	2.0901	7	7	1.494	10	10	2.2096	1.93123	0.38334	2.95959
7837	PXDN	peroxidasin	COPOA|D2S448|D2S448E|MG50|PRG2|PXN|VPO	NP_036425	0	0	0.2243	1	1	0.4197	0	0	0.2225	0.288833	0.113337	5	5	1.1611	0	0	0.2263	4	4	1.031	0.806133	0.506346	2.791
4149	MAX	MYC associated factor X	bHLHd4	NP_001257997;NP_001257998;NP_001307344;NP_002373;NP_660087;NP_660088;NP_660089;NP_932061	0	0	0.2243	1	1	0.4197	0	0	0.2225	0.288833	0.113337	1	1	0.418	4	4	0.9507	4	4	1.031	0.7999	0.333163	2.76942
8189	SYMPK	symplekin	SPK|SYM	NP_004810	3	3	0.7627	3	3	0.7929	3	3	0.7564	0.770667	0.0195106	13	13	2.6476	6	6	1.3129	10	11	2.4061	2.1222	0.7112	2.75372
4548	MTR	5-methyltetrahydrofolate-homocysteine methyltransferase	HMAG|MS|cblG	NP_000245;NP_001278868;NP_001278869	0	0	0.2243	0	0	0.2332	3	3	0.7564	0.404633	0.304671	8	8	1.7185	3	3	0.7696	3	3	0.8346	1.10757	0.530081	2.73721
8829	NRP1	neuropilin 1	BDCA4|CD304|NP1|NRP|VEGF165R	NP_001019799;NP_001019800;NP_001231901;NP_001231902;NP_003864	0	0	0.2243	0	0	0.2332	0	0	0.2225	0.226667	0.00572917	1	1	0.418	1	1	0.4074	4	4	1.031	0.6188	0.357015	2.73
94025	MUC16	mucin 16, cell surface associated	CA125	NP_078966	0	0	0.2243	0	0	0.2332	0	0	0.2225	0.226667	0.00572917	0	0	0.2322	2	2	0.5885	4	4	1.031	0.617233	0.400174	2.72309
114793	FMNL2	formin like 2	FHOD2	NP_443137	0	0	0.2243	0	0	0.2332	0	0	0.2225	0.226667	0.00572917	3	3	0.7895	0	0	0.2263	3	3	0.8346	0.6168	0.338934	2.72118
4363	ABCC1	ATP binding cassette subfamily C member 1	ABC29|ABCC|GS-X|MRP|MRP1	NP_004987	1	1	0.4038	0	0	0.2332	1	1	0.4004	0.3458	0.0975293	5	5	1.1611	2	2	0.5885	4	4	1.031	0.926867	0.300167	2.68035
64778	FNDC3B	fibronectin type III domain containing 3B	FAD104|PRO4979|YVTM2421	NP_001128567;NP_073600	2	2	0.5833	0	0	0.2332	2	2	0.5784	0.464967	0.200731	6	6	1.3469	3	3	0.7696	7	7	1.6203	1.2456	0.434303	2.6789
57647	DHX37	DEAH-box helicase 37	DDX37	NP_116045	2	2	0.5833	1	1	0.4197	1	1	0.4004	0.4678	0.10049	7	7	1.5327	2	2	0.5885	7	7	1.6203	1.24717	0.572101	2.66603
3151	HMGN2	high mobility group nucleosomal binding domain 2	HMG17	NP_005508	0	0	0.2243	4	4	0.9795	0	0	0.2225	0.475433	0.436535	3	6	1.3469	0	0	0.2263	6	10	2.2096	1.26093	0.994441	2.65218
124997	WDR81	WD repeat domain 81	CAMRQ2|PPP1R166	NP_001157145;NP_001157281;NP_001157283;NP_689561	1	1	0.4038	1	1	0.4197	0	0	0.2225	0.348667	0.109552	4	6	1.3469	1	2	0.5885	3	3	0.8346	0.923333	0.386908	2.64818
55690	PACS1	phosphofurin acidic cluster sorting protein 1	MRD17	NP_060496	2	2	0.5833	1	1	0.4197	1	1	0.4004	0.4678	0.10049	8	8	1.7185	3	3	0.7696	5	5	1.2274	1.2385	0.474547	2.6475
60386	SLC25A19	solute carrier family 25 (mitochondrial thiamine pyrophosphate carrier), member 19	DNC|MCPHA|MUP1|THMD3|THMD4|TPC	NP_001119593;NP_001119594;NP_068380	0	0	0.2243	0	0	0.2332	0	0	0.2225	0.226667	0.00572917	2	2	0.6037	4	4	0.9507	0	0	0.2455	0.599967	0.352615	2.64691
5253	PHF2	PHD finger protein 2	CENP-35|GRC5|JHDM1E	NP_005383	0	0	0.2243	0	0	0.2332	1	1	0.4004	0.285967	0.099202	3	3	0.7895	1	1	0.4074	4	4	1.031	0.742633	0.314431	2.59692
66036	MTMR9	myotubularin related protein 9	C8orf9|LIP-STYX|MTMR8	NP_056273	1	1	0.4038	0	0	0.2332	0	0	0.2225	0.2865	0.101726	2	2	0.6037	3	3	0.7696	3	3	0.8346	0.735967	0.119068	2.56882
1889	ECE1	endothelin converting enzyme 1	ECE	NP_001106818;NP_001106819;NP_001106820;NP_001388	1	1	0.4038	1	1	0.4197	2	2	0.5784	0.4673	0.0965433	4	4	0.9753	2	2	0.5885	8	9	2.0132	1.19233	0.736729	2.55154
221037	JMJD1C	jumonji domain containing 1C	TRIP-8|TRIP8	NP_001269877;NP_001305082;NP_001305083;NP_001309181;NP_001309183;NP_001309187;NP_116165	1	1	0.4038	0	0	0.2332	0	0	0.2225	0.2865	0.101726	5	5	1.1611	2	2	0.5885	1	1	0.4418	0.730467	0.380084	2.54962
3700	ITIH4	inter-alpha-trypsin inhibitor heavy chain family member 4	GP120|H4P|IHRP|ITI-HC4|ITIHL1|PK-120|PK120	NP_001159921;NP_002209	0	0	0.2243	1	1	0.4197	3	3	0.7564	0.4668	0.269159	3	4	0.9753	3	4	0.9507	4	7	1.6203	1.1821	0.379692	2.53235
10802	SEC24A	SEC24 homolog A, COPII coat complex component	-	NP_001239160;NP_068817	1	1	0.4038	1	1	0.4197	2	2	0.5784	0.4673	0.0965433	4	4	0.9753	4	4	0.9507	7	7	1.6203	1.1821	0.379692	2.52964
5747	PTK2	protein tyrosine kinase 2	FADK|FAK|FAK1|FRNK|PPP1R71|p125FAK|pp125FAK	NP_001186578;NP_001303271;NP_005598;NP_722560	1	1	0.4038	1	1	0.4197	3	3	0.7564	0.526633	0.199143	3	3	0.7895	4	4	0.9507	8	10	2.2096	1.3166	0.777549	2.50003
1062	CENPE	centromere protein E	CENP-E|KIF10|MCPH13|PPP1R61	NP_001273663;NP_001804	0	0	0.2243	0	0	0.2332	0	0	0.2225	0.226667	0.00572917	1	1	0.418	0	0	0.2263	4	4	1.031	0.558433	0.420329	2.46368
3673	ITGA2	integrin subunit alpha 2	BR|CD49B|GPIa|HPA-5|VLA-2|VLAA2	NP_002194	4	4	0.9422	5	5	1.1661	11	11	2.1805	1.4296	0.659864	18	18	3.577	13	13	2.5808	19	21	4.3711	3.50963	0.897049	2.45498
64062	RBM26	RNA binding motif protein 26	ARRS2|C13orf10|PPP1R132|PRO1777|SE70-2|ZC3H17	NP_001273560;NP_001273561;NP_071401	3	3	0.7627	0	0	0.2332	3	3	0.7564	0.5841	0.303905	7	7	1.5327	4	4	0.9507	7	8	1.8167	1.43337	0.441463	2.45397
25942	SIN3A	SIN3 transcription regulator family member A	-	NP_001138829;NP_001138830;NP_056292	3	3	0.7627	0	0	0.2332	3	3	0.7564	0.5841	0.303905	8	8	1.7185	4	4	0.9507	7	7	1.6203	1.42983	0.417837	2.44793
9678	PHF14	PHD finger protein 14	-	NP_055475	0	0	0.2243	0	0	0.2332	0	0	0.2225	0.226667	0.00572917	3	3	0.7895	0	0	0.2263	2	2	0.6382	0.551333	0.291475	2.43235
9910	RABGAP1L	RAB GTPase activating protein 1-like	HHL|TBC1D18	NP_001030307;NP_001230692;NP_001230693;NP_001230694;NP_055672	0	0	0.2243	0	0	0.2332	0	0	0.2225	0.226667	0.00572917	2	2	0.6037	1	1	0.4074	2	2	0.6382	0.549767	0.124494	2.42544
22998	LIMCH1	LIM and calponin homology domains 1	LIMCH1A|LMO7B	NP_001106188;NP_001106189;NP_001106190;NP_001106191;NP_001276051;NP_001276053;NP_055803	10	10	2.0193	5	5	1.1661	9	9	1.8244	1.66993	0.447082	30	32	6.18	14	14	2.762	15	15	3.192	4.04467	1.86171	2.42205
5331	PLCB3	phospholipase C beta 3	-	NP_000923;NP_001171812;NP_001303243	8	8	1.6602	0	0	0.2332	6	6	1.2904	1.06127	0.74058	19	19	3.7628	4	4	0.9507	14	14	2.9955	2.56967	1.45361	2.42132
9646	CTR9	CTR9 homolog, Paf1/RNA polymerase II complex component	SH2BP1|TSBP|p150|p150TSP	NP_055448	4	4	0.9422	0	0	0.2332	7	7	1.4684	0.881267	0.61985	16	16	3.2052	5	5	1.1318	9	9	2.0132	2.11673	1.04057	2.40192
3397	ID1	inhibitor of DNA binding 1, dominant negative helix-loop-helix protein	ID|bHLHb24	NP_002156;NP_851998	0	0	0.2243	0	0	0.2332	0	0	0.2225	0.226667	0.00572917	4	5	1.1611	0	0	0.2263	0	0	0.2455	0.5443	0.534251	2.40132
85358	SHANK3	SH3 and multiple ankyrin repeat domains 3	DEL22q13.3|PROSAP2|PSAP2|SCZD15|SPANK-2	NP_277052	0	0	0.2243	0	0	0.2332	0	0	0.2225	0.226667	0.00572917	1	1	0.418	3	3	0.7696	1	1	0.4418	0.543133	0.196487	2.39618
55117	SLC6A15	solute carrier family 6 (neutral amino acid transporter), member 15	NTT73|SBAT1|V7-3|hv7-3	NP_001139807;NP_060527;NP_877499	0	0	0.2243	0	0	0.2332	0	0	0.2225	0.226667	0.00572917	4	4	0.9753	1	1	0.4074	0	0	0.2455	0.542733	0.38326	2.39441
7763	ZFAND5	zinc finger, AN1-type domain 5	ZA20D2|ZFAND5A|ZNF216	NP_001095890;NP_001095891;NP_001265172;NP_001265173;NP_001265174;NP_005998	0	0	0.2243	0	0	0.2332	0	0	0.2225	0.226667	0.00572917	3	4	0.9753	1	1	0.4074	0	0	0.2455	0.542733	0.38326	2.39441
387104	SOGA3	SOGA family member 3	C6orf174|dJ403A15.3	NP_001012279	1	1	0.4038	0	0	0.2332	0	0	0.2225	0.2865	0.101726	1	1	0.418	1	1	0.4074	5	5	1.2274	0.684267	0.470397	2.38837
90411	MCFD2	multiple coagulation factor deficiency 2	F5F8D|F5F8D2|LMAN1IP|SDNSF	NP_001164977;NP_001164978;NP_001164979;NP_001164980;NP_001164981;NP_001164982;NP_644808	0	0	0.2243	0	0	0.2332	0	0	0.2225	0.226667	0.00572917	2	3	0.7895	2	2	0.5885	0	0	0.2455	0.541167	0.275072	2.3875
4248	MGAT3	mannosyl (beta-1,4-)-glycoprotein beta-1,4-N-acetylglucosaminyltransferase	GNT-III|GNT3	NP_001091740;NP_002400	0	0	0.2243	0	0	0.2332	0	0	0.2225	0.226667	0.00572917	1	2	0.6037	3	3	0.7696	0	0	0.2455	0.5396	0.267865	2.38059
3039	HBA1	hemoglobin subunit alpha 1	HBA-T3|HBH	NP_000549	4	16	3.0965	4	15	3.0323	4	16	3.0707	3.0665	0.0323054	5	25	4.8783	5	45	8.3812	4	42	8.5001	7.2532	2.05758	2.3653
3040	HBA2	hemoglobin subunit alpha 2	HBA-T2|HBH	NP_000508	4	16	3.0965	4	15	3.0323	4	16	3.0707	3.0665	0.0323054	5	25	4.8783	5	45	8.3812	4	42	8.5001	7.2532	2.05758	2.3653
2060	EPS15	epidermal growth factor receptor pathway substrate 15	AF-1P|AF1P|MLLT5	NP_001153441;NP_001972	4	4	0.9422	1	1	0.4197	0	0	0.2225	0.528133	0.371901	5	5	1.1611	3	3	0.7696	8	8	1.8167	1.24913	0.529072	2.36519
5362	PLXNA2	plexin A2	OCT|PLXN2	NP_079455	0	0	0.2243	1	1	0.4197	0	0	0.2225	0.288833	0.113337	0	0	0.2322	2	2	0.5885	5	5	1.2274	0.6827	0.504243	2.36365
8497	PPFIA4	protein tyrosine phosphatase, receptor type, f polypeptide (PTPRF), interacting protein (liprin), alpha 4	-	NP_001291260;NP_001291261	0	0	0.2243	0	0	0.2332	1	1	0.4004	0.285967	0.099202	4	4	0.9753	1	1	0.4074	2	2	0.6382	0.673633	0.285603	2.35564
11346	SYNPO	synaptopodin	-	NP_001103444;NP_001159680;NP_001159681;NP_009217	0	0	0.2243	0	0	0.2332	2	2	0.5784	0.3453	0.20192	1	1	0.418	2	2	0.5885	6	6	1.4239	0.810133	0.53833	2.34617
79677	SMC6	structural maintenance of chromosomes 6	SMC-6|SMC6L1|hSMC6	NP_001135758;NP_078900	2	2	0.5833	0	0	0.2332	0	0	0.2225	0.346333	0.205289	2	2	0.6037	1	1	0.4074	5	6	1.4239	0.811667	0.539218	2.3436
23236	PLCB1	phospholipase C beta 1	EIEE12|PI-PLC|PLC-154|PLC-I|PLC154|PLCB1A|PLCB1B	NP_056007;NP_877398	2	2	0.5833	0	0	0.2332	4	4	0.9344	0.583633	0.3506	9	9	1.9043	3	3	0.7696	6	6	1.4239	1.36593	0.569567	2.3404
8165	AKAP1	A-kinase anchoring protein 1	AKAP|AKAP121|AKAP149|AKAP84|D-AKAP1|PPP1R43|PRKA1|SAKAP84|TDRD17	NP_001229831;NP_001229832;NP_003479	2	2	0.5833	0	0	0.2332	0	0	0.2225	0.346333	0.205289	1	1	0.418	2	2	0.5885	6	6	1.4239	0.810133	0.53833	2.33917
6341	SCO1	SCO1 cytochrome c oxidase assembly protein	SCOD1	NP_004580	0	0	0.2243	1	1	0.4197	0	0	0.2225	0.288833	0.113337	2	2	0.6037	2	2	0.5885	3	3	0.8346	0.6756	0.137908	2.33907
5981	RFC1	replication factor C subunit 1	A1|MHCBFB|PO-GA|RECC1|RFC|RFC140	NP_001191676;NP_002904	5	5	1.1217	1	1	0.4197	4	4	0.9344	0.825267	0.363502	15	15	3.0193	5	5	1.1318	7	7	1.6203	1.9238	0.979667	2.33113
6093	ROCK1	Rho associated coiled-coil containing protein kinase 1	P160ROCK|ROCK-I	NP_005397	0	0	0.2243	0	0	0.2332	1	1	0.4004	0.285967	0.099202	6	6	1.3469	1	1	0.4074	0	0	0.2455	0.6666	0.594692	2.33104
57521	RPTOR	regulatory associated protein of MTOR, complex 1	KOG1|Mip1	NP_001156506;NP_065812	0	0	0.2243	0	0	0.2332	2	2	0.5784	0.3453	0.20192	3	3	0.7895	2	2	0.5885	4	4	1.031	0.803	0.221559	2.32551
23061	TBC1D9B	TBC1 domain family member 9B	-	NP_055858;NP_942568	0	0	0.2243	1	1	0.4197	1	1	0.4004	0.348133	0.107676	3	3	0.7895	2	2	0.5885	4	4	1.031	0.803	0.221559	2.30659
56957	OTUD7B	OTU deubiquitinase 7B	CEZANNE|ZA20D1	NP_064590	0	0	0.2243	1	1	0.4197	2	2	0.5784	0.407467	0.177367	2	2	0.6037	2	2	0.5885	7	7	1.6203	0.9375	0.591371	2.3008
10180	RBM6	RNA binding motif protein 6	3G2|DEF-3|DEF3|HLC-11|NY-LU-12|g16	NP_001161054;NP_005768	3	3	0.7627	0	0	0.2332	0	0	0.2225	0.406133	0.308842	6	6	1.3469	0	0	0.2263	5	5	1.2274	0.933533	0.61539	2.29859
4734	NEDD4	neural precursor cell expressed, developmentally down-regulated 4, E3 ubiquitin protein ligase	NEDD4-1|RPF1	NP_001271267;NP_001271268;NP_001271269;NP_006145;NP_940682	2	2	0.5833	1	1	0.4197	0	0	0.2225	0.4085	0.180661	5	5	1.1611	2	2	0.5885	4	4	1.031	0.926867	0.300167	2.26895
1659	DHX8	DEAH-box helicase 8	DDX8|HRH1|PRP22|PRPF22	NP_001289552;NP_001309145;NP_001309146;NP_001309147;NP_001309148;NP_001309149;NP_001309150;NP_004932	1	1	0.4038	0	0	0.2332	2	3	0.7564	0.464467	0.266824	5	5	1.1611	3	3	0.7696	5	5	1.2274	1.0527	0.247403	2.26647
27348	TOR1B	torsin family 1 member B	DQ1	NP_001304822;NP_001304823;NP_055321	2	2	0.5833	0	0	0.2332	0	0	0.2225	0.346333	0.205289	4	4	0.9753	5	5	1.1318	0	0	0.2455	0.7842	0.473045	2.26429
23384	SPECC1L	sperm antigen with calponin homology and coiled-coil domains 1-like	CYTSA|GBBB2|OBLFC1	NP_001138940;NP_001241661;NP_001241662;NP_056145	3	3	0.7627	0	0	0.2332	2	2	0.5784	0.524767	0.268794	9	9	1.9043	1	1	0.4074	5	5	1.2274	1.1797	0.749589	2.24805
84816	RTN4IP1	reticulon 4 interacting protein 1	NIMP	NP_001305675;NP_116119	2	2	0.5833	0	0	0.2332	1	1	0.4004	0.405633	0.175109	4	4	0.9753	6	6	1.3129	1	1	0.4418	0.91	0.439206	2.24341
10426	TUBGCP3	tubulin gamma complex associated protein 3	104p|GCP3|Grip104|SPBC98|Spc98|Spc98p	NP_001273206;NP_001273207;NP_001273208;NP_006313	2	2	0.5833	1	1	0.4197	2	2	0.5784	0.527133	0.0930722	6	6	1.3469	5	5	1.1318	4	4	1.031	1.1699	0.16136	2.21936
9690	UBE3C	ubiquitin protein ligase E3C	HECTH2	NP_055486	1	1	0.4038	2	2	0.6063	4	4	0.9344	0.648167	0.267766	3	3	0.7895	6	6	1.3129	10	10	2.2096	1.43733	0.718181	2.21754
84687	PPP1R9B	protein phosphatase 1 regulatory subunit 9B	PPP1R6|PPP1R9|SPINO|Spn	NP_115984	5	5	1.1217	1	1	0.4197	3	3	0.7564	0.765933	0.351097	9	9	1.9043	6	6	1.3129	8	8	1.8167	1.67797	0.319177	2.19075
51479	ANKFY1	ankyrin repeat and FYVE domain containing 1	ANKHZN|BTBD23|ZFYVE14	NP_001244928;NP_057460	0	0	0.2243	0	0	0.2332	0	0	0.2225	0.226667	0.00572917	0	0	0.2322	0	0	0.2263	4	4	1.031	0.4965	0.4629	2.19044
1755	DMBT1	deleted in malignant brain tumors 1	GP340|muclin	NP_001307573;NP_004397;NP_015568;NP_060049	0	0	0.2243	0	0	0.2332	0	0	0.2225	0.226667	0.00572917	0	0	0.2322	0	0	0.2263	4	4	1.031	0.4965	0.4629	2.19044
701	BUB1B	BUB1 mitotic checkpoint serine/threonine kinase B	BUB1beta|BUBR1|Bub1A|MAD3L|MVA1|SSK1|hBUBR1	NP_001202	1	1	0.4038	0	0	0.2332	0	0	0.2225	0.2865	0.101726	1	1	0.418	0	0	0.2263	5	5	1.2274	0.6239	0.531363	2.17766
55813	UTP6	UTP6 small subunit processome component	C17orf40|HCA66	NP_060898	0	0	0.2243	0	0	0.2332	1	1	0.4004	0.285967	0.099202	0	0	0.2322	1	1	0.4074	5	5	1.2274	0.622333	0.531275	2.17624
10617	STAMBP	STAM binding protein	AMSH|MICCAP	NP_006454;NP_964010;NP_998787	0	0	0.2243	3	3	0.7929	5	5	1.1124	0.709867	0.449835	10	12	2.4618	5	5	1.1318	4	4	1.031	1.54153	0.798566	2.17158
23085	ERC1	ELKS/RAB6-interacting/CAST family member 1	Cast2|ELKS|ERC-1|RAB6IP2	NP_001288177;NP_829883;NP_829884	4	4	0.9422	5	5	1.1661	4	4	0.9344	1.01423	0.131578	12	13	2.6476	5	5	1.1318	12	13	2.799	2.1928	0.921966	2.16203
30846	EHD2	EH domain containing 2	PAST2	NP_055416	0	0	0.2243	0	0	0.2332	0	0	0.2225	0.226667	0.00572917	2	2	0.6037	0	0	0.2263	1	2	0.6382	0.4894	0.228503	2.15912
54892	NCAPG2	non-SMC condensin II complex subunit G2	CAP-G2|CAPG2|LUZP5|MTB|hCAP-G2	NP_001268861;NP_001268862;NP_060230	1	1	0.4038	1	1	0.4197	1	1	0.4004	0.407967	0.0103026	2	2	0.6037	1	1	0.4074	6	7	1.6203	0.877133	0.651042	2.15001
57117	INTS12	integrator complex subunit 12	INT12|PHF22|SBBI22	NP_001135943;NP_065128	0	0	0.2243	1	1	0.4197	0	0	0.2225	0.288833	0.113337	2	2	0.6037	0	0	0.2263	4	4	1.031	0.620333	0.402608	2.14772
9785	DHX38	DEAH-box helicase 38	DDX38|PRP16|PRPF16	NP_054722	5	5	1.1217	5	5	1.1661	6	7	1.4684	1.25207	0.188661	20	20	3.9487	6	6	1.3129	13	13	2.799	2.68687	1.32147	2.14595
316	AOX1	aldehyde oxidase 1	AO|AOH1	NP_001150	0	0	0.2243	0	0	0.2332	0	0	0.2225	0.226667	0.00572917	0	0	0.2322	2	2	0.5885	2	2	0.6382	0.4863	0.221456	2.14544
63971	KIF13A	kinesin family member 13A	RBKIN|bA500C11.2	NP_001099036;NP_001099037;NP_001099038;NP_001230352;NP_071396	0	0	0.2243	0	0	0.2332	0	0	0.2225	0.226667	0.00572917	0	0	0.2322	2	2	0.5885	2	2	0.6382	0.4863	0.221456	2.14544
23075	SWAP70	SWAP switching B-cell complex 70kDa subunit	HSPC321|SWAP-70	NP_001284643;NP_055870	0	0	0.2243	0	0	0.2332	0	0	0.2225	0.226667	0.00572917	0	0	0.2322	2	2	0.5885	2	2	0.6382	0.4863	0.221456	2.14544
80028	FBXL18	F-box and leucine-rich repeat protein 18	Fbl18	NP_001308142;NP_079239	0	0	0.2243	0	0	0.2332	0	0	0.2225	0.226667	0.00572917	3	3	0.7895	0	0	0.2263	1	1	0.4418	0.485867	0.284174	2.14353
2733	GLE1	GLE1, RNA export mediator	GLE1L|LCCS|LCCS1|hGLE1	NP_001003722;NP_001490	0	0	0.2243	0	0	0.2332	0	0	0.2225	0.226667	0.00572917	3	3	0.7895	0	0	0.2263	1	1	0.4418	0.485867	0.284174	2.14353
114880	OSBPL6	oxysterol binding protein like 6	ORP6	NP_001188409;NP_001188410;NP_001188411;NP_115912;NP_665682	0	0	0.2243	0	0	0.2332	0	0	0.2225	0.226667	0.00572917	3	3	0.7895	0	0	0.2263	1	1	0.4418	0.485867	0.284174	2.14353
8914	TIMELESS	timeless circadian clock	TIM|TIM1|hTIM	NP_003911	0	0	0.2243	0	0	0.2332	0	0	0.2225	0.226667	0.00572917	3	3	0.7895	0	0	0.2263	1	1	0.4418	0.485867	0.284174	2.14353
27037	TRMT2A	tRNA methyltransferase 2 homolog A	HTF9C	NP_001244923;NP_073564;NP_892029	0	0	0.2243	0	0	0.2332	0	0	0.2225	0.226667	0.00572917	3	3	0.7895	0	0	0.2263	1	1	0.4418	0.485867	0.284174	2.14353
57539	WDR35	WD repeat domain 35	CED2|IFT121|IFTA1|SRTD7	NP_001006658;NP_065830	0	0	0.2243	0	0	0.2332	0	0	0.2225	0.226667	0.00572917	3	3	0.7895	0	0	0.2263	1	1	0.4418	0.485867	0.284174	2.14353
23325	KIAA1033	KIAA1033	MRT43|SWIP	NP_001280569;NP_056090	0	0	0.2243	0	0	0.2332	4	4	0.9344	0.463967	0.407432	2	2	0.6037	4	4	0.9507	6	6	1.4239	0.992767	0.411715	2.13974
9961	MVP	major vault protein	LRP|VAULT1	NP_001280133;NP_001280134;NP_005106;NP_059447	1	1	0.4038	0	0	0.2332	1	1	0.4004	0.3458	0.0975293	4	4	0.9753	1	1	0.4074	2	3	0.8346	0.7391	0.29575	2.13736
7561	ZNF14	zinc finger protein 14	GIOT-4|KOX6	NP_066358	0	0	0.2243	0	0	0.2332	0	0	0.2225	0.226667	0.00572917	1	2	0.6037	1	1	0.4074	1	1	0.4418	0.4843	0.104824	2.13662
55181	SMG8	SMG8 nonsense mediated mRNA decay factor	C17orf71	NP_060619	1	1	0.4038	1	1	0.4197	1	1	0.4004	0.407967	0.0103026	5	5	1.1611	0	0	0.2263	4	5	1.2274	0.8716	0.559829	2.13645
9724	UTP14C	UTP14, U3 small nucleolar ribonucleoprotein, homolog C (yeast)	2700066J21Rik|KIAA0266|UTP14B	NP_067677	4	4	0.9422	0	0	0.2332	0	0	0.2225	0.465967	0.412465	6	7	1.5327	0	0	0.2263	5	5	1.2274	0.995467	0.683385	2.13635
80124	VCPIP1	valosin containing protein (p97)/p47 complex interacting protein 1	DUBA3|VCIP135	NP_079330	0	0	0.2243	1	1	0.4197	0	0	0.2225	0.288833	0.113337	3	3	0.7895	0	0	0.2263	3	3	0.8346	0.6168	0.338934	2.13549
55119	PRPF38B	pre-mRNA processing factor 38B	NET1	NP_060531	1	1	0.4038	0	0	0.2332	0	0	0.2225	0.2865	0.101726	3	3	0.7895	1	1	0.4074	2	2	0.6382	0.6117	0.192423	2.13508
10725	NFAT5	nuclear factor of activated T-cells 5, tonicity-responsive	NF-AT5|NFATL1|NFATZ|OREBP|TONEBP	NP_001106649;NP_006590;NP_619727;NP_619728;NP_775321;NP_775322	1	1	0.4038	1	1	0.4197	0	0	0.2225	0.348667	0.109552	4	4	0.9753	0	0	0.2263	3	4	1.031	0.7442	0.449378	2.13442
647087	C7orf73	chromosome 7 open reading frame 73	PL-5283	NP_001124401	0	0	0.2243	0	0	0.2332	0	0	0.2225	0.226667	0.00572917	1	1	0.418	2	2	0.5885	1	1	0.4418	0.482767	0.0923378	2.12985
1285	COL4A3	collagen type IV alpha 3	-	NP_000082	0	0	0.2243	0	0	0.2332	0	0	0.2225	0.226667	0.00572917	1	1	0.418	2	2	0.5885	1	1	0.4418	0.482767	0.0923378	2.12985
8805	TRIM24	tripartite motif containing 24	PTC6|RNF82|TF1A|TIF1|TIF1A|TIF1ALPHA|hTIF1	NP_003843;NP_056989	1	1	0.4038	1	1	0.4197	3	3	0.7564	0.526633	0.199143	7	7	1.5327	1	1	0.4074	6	6	1.4239	1.12133	0.620673	2.12925
9897	KIAA0196	KIAA0196	RTSC|SPG8	NP_055661	3	3	0.7627	0	0	0.2332	4	4	0.9344	0.643433	0.365498	5	5	1.1611	5	5	1.1318	8	8	1.8167	1.36987	0.387246	2.129
146754	DNAH2	dynein, axonemal, heavy chain 2	DNAHC2|DNHD3	NP_001290199;NP_065928	0	0	0.2243	0	0	0.2332	1	1	0.4004	0.285967	0.099202	1	1	0.418	3	3	0.7696	1	2	0.6382	0.6086	0.177659	2.12822
50618	ITSN2	intersectin 2	PRO2015|SH3D1B|SH3P18|SWA|SWAP	NP_006268;NP_062541;NP_671494	0	0	0.2243	0	0	0.2332	0	0	0.2225	0.226667	0.00572917	4	4	0.9753	0	0	0.2263	0	0	0.2455	0.482367	0.427001	2.12809
6698	SPRR1A	small proline rich protein 1A	SPRK	NP_001186757;NP_005978	0	0	0.2243	0	0	0.2332	0	0	0.2225	0.226667	0.00572917	4	4	0.9753	0	0	0.2263	0	0	0.2455	0.482367	0.427001	2.12809
6699	SPRR1B	small proline rich protein 1B	CORNIFIN|GADD33|SPR-IB|SPRR1	NP_003116	0	0	0.2243	0	0	0.2332	0	0	0.2225	0.226667	0.00572917	4	4	0.9753	0	0	0.2263	0	0	0.2455	0.482367	0.427001	2.12809
23339	VPS39	VPS39 HOPS complex subunit	TLP|VAM6|hVam6p	NP_001288067;NP_056104	0	0	0.2243	0	0	0.2332	0	0	0.2225	0.226667	0.00572917	4	4	0.9753	0	0	0.2263	0	0	0.2455	0.482367	0.427001	2.12809
4646	MYO6	myosin VI	DFNA22|DFNB37	NP_001287828;NP_004990	0	0	0.2243	0	0	0.2332	3	3	0.7564	0.404633	0.304671	8	8	1.7185	0	0	0.2263	2	2	0.6382	0.861	0.770646	2.12785
6814	STXBP3	syntaxin binding protein 3	MUNC18-3|MUNC18C|PSP|UNC-18C	NP_009200	0	0	0.2243	1	1	0.4197	2	2	0.5784	0.407467	0.177367	1	1	0.418	4	4	0.9507	5	5	1.2274	0.865367	0.411392	2.12377
79607	FAM118B	family with sequence similarity 118 member B	-	NP_078832	0	0	0.2243	0	0	0.2332	0	0	0.2225	0.226667	0.00572917	0	0	0.2322	3	3	0.7696	1	1	0.4418	0.4812	0.270858	2.12294
6416	MAP2K4	mitogen-activated protein kinase kinase 4	JNKK|JNKK1|MAPKK4|MEK4|MKK4|PRKMK4|SAPKK-1|SAPKK1|SEK1|SERK1|SKK1	NP_001268364;NP_003001	0	0	0.2243	0	0	0.2332	0	0	0.2225	0.226667	0.00572917	0	0	0.2322	3	3	0.7696	1	1	0.4418	0.4812	0.270858	2.12294
1767	DNAH5	dynein, axonemal, heavy chain 5	CILD3|DNAHC5|HL1|KTGNR|PCD	NP_001360	0	0	0.2243	0	0	0.2332	0	0	0.2225	0.226667	0.00572917	3	3	0.7895	1	1	0.4074	0	0	0.2455	0.4808	0.279329	2.12118
51303	FKBP11	FK506 binding protein 11	FKBP19	NP_001137253;NP_001137254;NP_057678	0	0	0.2243	0	0	0.2332	0	0	0.2225	0.226667	0.00572917	3	3	0.7895	1	1	0.4074	0	0	0.2455	0.4808	0.279329	2.12118
89932	PAPLN	papilin, proteoglycan-like sulfated glycoprotein	-	NP_775733	0	0	0.2243	0	0	0.2332	0	0	0.2225	0.226667	0.00572917	2	3	0.7895	1	1	0.4074	0	0	0.2455	0.4808	0.279329	2.12118
79631	EFL1	elongation factor like GTPase 1	EFTUD1|FAM42A|HsT19294|RIA1	NP_001035700;NP_001309773;NP_001309774;NP_078856	1	1	0.4038	1	1	0.4197	4	4	0.9344	0.585967	0.301857	7	7	1.5327	3	3	0.7696	6	6	1.4239	1.24207	0.412769	2.11969
283578	TMED8	transmembrane p24 trafficking protein family member 8	FAM15B	NP_998766	0	0	0.2243	0	0	0.2332	1	1	0.4004	0.285967	0.099202	2	2	0.6037	3	3	0.7696	1	1	0.4418	0.605033	0.163904	2.11575
64755	C16orf58	chromosome 16 open reading frame 58	RUS	NP_073581	0	0	0.2243	0	0	0.2332	0	0	0.2225	0.226667	0.00572917	2	2	0.6037	2	2	0.5885	0	0	0.2455	0.479233	0.202562	2.11426
55863	TMEM126B	transmembrane protein 126B	HT007	NP_001180466;NP_001180467;NP_001243475;NP_001243476;NP_060950	0	0	0.2243	0	0	0.2332	0	0	0.2225	0.226667	0.00572917	2	2	0.6037	2	2	0.5885	0	0	0.2455	0.479233	0.202562	2.11426
9828	ARHGEF17	Rho guanine nucleotide exchange factor 17	P164RHOGEF|TEM4|p164-RhoGEF	NP_055601	3	3	0.7627	3	3	0.7929	1	1	0.4004	0.652	0.218415	10	10	2.0901	0	0	0.2263	8	8	1.8167	1.3777	1.00647	2.11304
22874	PLEKHA6	pleckstrin homology domain containing A6	PEPP-3|PEPP3	NP_055750	6	6	1.3012	3	3	0.7929	5	5	1.1124	1.06883	0.256935	13	13	2.6476	5	5	1.1318	14	14	2.9955	2.2583	0.990964	2.11286
6793	STK10	serine/threonine kinase 10	LOK|PRO2729	NP_005981	1	1	0.4038	1	1	0.4197	2	2	0.5784	0.4673	0.0965433	5	5	1.1611	3	3	0.7696	4	4	1.031	0.987233	0.199386	2.11263
55833	UBAP2	ubiquitin associated protein 2	UBAP-2	NP_001269458;NP_001269459;NP_060919	4	4	0.9422	2	2	0.6063	1	1	0.4004	0.649633	0.273487	6	6	1.3469	4	4	0.9507	8	8	1.8167	1.37143	0.433521	2.11109
100499483	CCDC180	coiled-coil domain containing 180	BDAG1|C9orf174|KIAA1529	NP_065944	0	0	0.2243	0	0	0.2332	0	0	0.2225	0.226667	0.00572917	1	1	0.418	3	3	0.7696	0	0	0.2455	0.4777	0.267102	2.1075
27031	NPHP3	nephronophthisis 3 (adolescent)	CFAP31|MKS7|NPH3|RHPD|RHPD1|SLSN3	NP_694972	0	0	0.2243	0	0	0.2332	0	0	0.2225	0.226667	0.00572917	1	1	0.418	3	3	0.7696	0	0	0.2455	0.4777	0.267102	2.1075
10743	RAI1	retinoic acid induced 1	SMCR|SMS	NP_109590	0	0	0.2243	0	0	0.2332	0	0	0.2225	0.226667	0.00572917	1	1	0.418	3	3	0.7696	0	0	0.2455	0.4777	0.267102	2.1075
27330	RPS6KA6	ribosomal protein S6 kinase, 90kDa, polypeptide 6	PP90RSK4|RSK4	NP_055311	0	0	0.2243	0	0	0.2332	0	0	0.2225	0.226667	0.00572917	1	1	0.418	3	3	0.7696	0	0	0.2455	0.4777	0.267102	2.1075
65244	SPATS2	spermatogenesis associated, serine rich 2	Nbla00526|P59SCR|SCR59|SPATA10	NP_001280214;NP_001280215;NP_075559	1	1	0.4038	1	1	0.4197	0	0	0.2225	0.348667	0.109552	1	1	0.418	3	4	0.9507	3	3	0.8346	0.734433	0.28012	2.10641
55102	ATG2B	autophagy related 2B	C14orf103	NP_060506	1	1	0.4038	0	0	0.2332	0	0	0.2225	0.2865	0.101726	4	4	0.9753	2	2	0.5885	0	0	0.2455	0.6031	0.365119	2.10506
23637	RABGAP1	RAB GTPase activating protein 1	GAPCENA|TBC1D11	NP_036329	5	5	1.1217	2	2	0.6063	3	3	0.7564	0.828133	0.265082	6	7	1.5327	7	8	1.6751	9	9	2.0132	1.74033	0.246803	2.10151
79738	BBS10	Bardet-Biedl syndrome 10	C12orf58	NP_078961	0	0	0.2243	0	0	0.2332	0	0	0.2225	0.226667	0.00572917	0	0	0.2322	2	4	0.9507	0	0	0.2455	0.476133	0.411041	2.10059
29942	PURG	purine-rich element binding protein G	PURG-A|PURG-B	NP_001015508;NP_001310240;NP_001310241;NP_037489	0	0	0.2243	0	0	0.2332	0	0	0.2225	0.226667	0.00572917	0	0	0.2322	3	4	0.9507	0	0	0.2455	0.476133	0.411041	2.10059
151393	RMDN2	regulator of microtubule dynamics 2	BLOCK18|FAM82A|FAM82A1|PRO34163|PYST9371|RMD-2|RMD2|RMD4	NP_001164262;NP_001164263;NP_001164264;NP_001309140;NP_001309141;NP_653314	0	0	0.2243	0	0	0.2332	0	0	0.2225	0.226667	0.00572917	0	0	0.2322	4	4	0.9507	0	0	0.2455	0.476133	0.411041	2.10059
6304	SATB1	SATB homeobox 1	-	NP_001124482;NP_001182399;NP_001309800;NP_001309801;NP_001309802;NP_001309803;NP_001309804;NP_001309805;NP_002962	0	0	0.2243	0	0	0.2332	0	0	0.2225	0.226667	0.00572917	0	0	0.2322	2	4	0.9507	0	0	0.2455	0.476133	0.411041	2.10059
91368	CDKN2AIPNL	CDKN2A interacting protein N-terminal like	-	NP_542387	1	1	0.4038	1	1	0.4197	1	1	0.4004	0.407967	0.0103026	1	1	0.418	4	6	1.3129	3	3	0.8346	0.855167	0.447804	2.09617
1861	TOR1A	torsin family 1, member A (torsin A)	DQ2|DYT1	NP_000104	1	1	0.4038	0	0	0.2332	1	1	0.4004	0.3458	0.0975293	1	1	0.418	6	6	1.3129	1	1	0.4418	0.724233	0.509939	2.09437
9994	CASP8AP2	caspase 8 associated protein 2	CED-4|FLASH|RIP25	NP_001131139;NP_001131140;NP_036247	0	0	0.2243	1	1	0.4197	0	0	0.2225	0.288833	0.113337	3	5	1.1611	1	1	0.4074	0	0	0.2455	0.604667	0.488637	2.09348
6388	SDF2	stromal cell derived factor 2	-	NP_008854	1	1	0.4038	1	1	0.4197	2	2	0.5784	0.4673	0.0965433	6	7	1.5327	4	4	0.9507	1	1	0.4418	0.975067	0.545858	2.0866
2029	ENSA	endosulfine alpha	ARPP-19e	NP_004427;NP_996925;NP_996926;NP_996927;NP_996928;NP_996929;NP_996930;NP_997051	4	4	0.9422	2	3	0.7929	1	1	0.4004	0.711833	0.279849	3	5	1.1611	6	13	2.5808	2	2	0.6382	1.46003	1.00521	2.05109
6904	TBCD	tubulin folding cofactor D	SSD-1|tfcD	NP_005984	3	3	0.7627	2	2	0.6063	6	6	1.2904	0.886467	0.358451	4	5	1.1611	7	7	1.494	12	13	2.799	1.81803	0.865695	2.05088
2	A2M	alpha-2-macroglobulin	A2MD|CPAMD5|FWP007|S863-7	NP_000005	4	8	1.6602	4	6	1.3526	6	9	1.8244	1.6124	0.239505	6	12	2.4618	6	13	2.5808	8	23	4.7642	3.26893	1.29631	2.02737
50807	ASAP1	ArfGAP with SH3 domain, ankyrin repeat and PH domain 1	AMAP1|CENTB4|DDEF1|PAG2|PAP|ZG14P	NP_001234925;NP_060952	2	2	0.5833	1	1	0.4197	3	3	0.7564	0.586467	0.168372	7	7	1.5327	1	1	0.4074	7	7	1.6203	1.1868	0.6764	2.02364
10427	SEC24B	SEC24 homolog B, COPII coat complex component	SEC24	NP_001036199;NP_001287742;NP_001305014;NP_001305015;NP_006314	2	2	0.5833	0	0	0.2332	3	3	0.7564	0.5243	0.266543	5	5	1.1611	2	2	0.5885	5	6	1.4239	1.05783	0.427167	2.01761
23369	PUM2	pumilio RNA binding family member 2	PUMH2|PUML2	NP_001269681;NP_001269719;NP_001269720;NP_056132	5	5	1.1217	2	2	0.6063	1	1	0.4004	0.709467	0.371552	9	12	2.4618	2	2	0.5885	5	5	1.2274	1.4259	0.952295	2.00982
9181	ARHGEF2	Rho/Rac guanine nucleotide exchange factor 2	GEF|GEF-H1|GEFH1|LFP40|P40	NP_001155855;NP_001155856;NP_004714	10	10	2.0193	5	5	1.1661	4	5	1.1124	1.4326	0.508806	14	14	2.8335	10	11	2.2185	15	17	3.585	2.879	0.684385	2.00963
55858	TMEM165	transmembrane protein 165	CDG2K|FT27|GDT1|TMPT27|TPARL	NP_060945	3	4	0.9422	1	1	0.4197	3	3	0.7564	0.7061	0.264857	1	3	0.7895	6	10	2.0374	4	6	1.4239	1.41693	0.623979	2.0067
55291	PPP6R3	protein phosphatase 6 regulatory subunit 3	C11orf23|PP6R3|SAP190|SAPL|SAPLa|SAPS3	NP_001157632;NP_001157633;NP_001157634;NP_001157635;NP_001157636;NP_060782	9	9	1.8397	4	4	0.9795	4	6	1.2904	1.36987	0.435571	17	18	3.577	9	9	1.8563	13	13	2.799	2.7441	0.861663	2.00319
6944	VPS72	vacuolar protein sorting 72 homolog (S. cerevisiae)	CFL1|Swc2|TCFL1|YL-1|YL1	NP_001258016;NP_001258017;NP_005988	0	0	0.2243	3	4	0.9795	2	2	0.5784	0.594067	0.377844	1	1	0.418	0	0	0.2263	0	0	0.2455	0.2966	0.105573	0.499271
1289	COL5A1	collagen type V alpha 1	EDSC	NP_000084;NP_001265003	1	1	0.4038	2	2	0.6063	1	1	0.4004	0.470167	0.117907	0	0	0.2322	0	0	0.2263	0	0	0.2455	0.234667	0.0098348	0.499114
2625	GATA3	GATA binding protein 3	HDR|HDRS	NP_001002295;NP_002042	1	1	0.4038	2	2	0.6063	1	1	0.4004	0.470167	0.117907	0	0	0.2322	0	0	0.2263	0	0	0.2455	0.234667	0.0098348	0.499114
81572	PDRG1	p53 and DNA damage regulated 1	C20orf126|PDRG	NP_110442	1	1	0.4038	2	2	0.6063	1	1	0.4004	0.470167	0.117907	0	0	0.2322	0	0	0.2263	0	0	0.2455	0.234667	0.0098348	0.499114
5993	RFX5	regulatory factor X5	-	NP_000440;NP_001020774	1	1	0.4038	2	2	0.6063	1	1	0.4004	0.470167	0.117907	0	0	0.2322	0	0	0.2263	0	0	0.2455	0.234667	0.0098348	0.499114
5116	PCNT	pericentrin	KEN|MOPD2|PCN|PCNT2|PCNTB|PCTN2|SCKL4	NP_001302458;NP_006022	9	9	1.8397	7	7	1.5392	3	3	0.7564	1.37843	0.559258	0	0	0.2322	1	1	0.4074	6	6	1.4239	0.687833	0.643443	0.498996
55177	RMDN3	regulator of microtubule dynamics 3	FAM82A2|FAM82C|RMD-3|RMD3|ptpip51	NP_001291731;NP_001310823;NP_001310824;NP_001310825;NP_001310826;NP_060615	8	8	1.6602	4	4	0.9795	5	5	1.1124	1.2507	0.360809	1	1	0.418	0	0	0.2263	5	5	1.2274	0.6239	0.531363	0.498841
1793	DOCK1	dedicator of cytokinesis 1	DOCK180|ced5	NP_001277152;NP_001371	2	2	0.5833	2	2	0.6063	0	0	0.2225	0.4707	0.215255	0	0	0.2322	0	0	0.2263	0	0	0.2455	0.234667	0.0098348	0.498548
2077	ERF	Ets2 repressor factor	CRS4|PE-2|PE2	NP_001287964;NP_001295331;NP_001299585;NP_006485	2	2	0.5833	1	2	0.6063	0	0	0.2225	0.4707	0.215255	0	0	0.2322	0	0	0.2263	0	0	0.2455	0.234667	0.0098348	0.498548
23658	LSM5	LSM5 homolog, U6 small nuclear RNA and mRNA degradation associated	YER146W	NP_001124182;NP_001132971;NP_036454	2	2	0.5833	2	2	0.6063	0	0	0.2225	0.4707	0.215255	0	0	0.2322	0	0	0.2263	0	0	0.2455	0.234667	0.0098348	0.498548
54930	HAUS4	HAUS augmin like complex subunit 4	C14orf94	NP_001159741;NP_001159742;NP_060285	0	0	0.2243	3	3	0.7929	1	1	0.4004	0.472533	0.291082	0	0	0.2322	0	0	0.2263	0	0	0.2455	0.234667	0.0098348	0.496614
100129520	TEX13C	TEX13 family member C	-	NP_001182201	0	0	0.2243	3	3	0.7929	1	1	0.4004	0.472533	0.291082	0	0	0.2322	0	0	0.2263	0	0	0.2455	0.234667	0.0098348	0.496614
49854	ZBTB21	zinc finger and BTB domain containing 21	ZNF295	NP_001091872;NP_001091873;NP_001307658;NP_001307660;NP_065778	0	0	0.2243	3	3	0.7929	1	1	0.4004	0.472533	0.291082	0	0	0.2322	0	0	0.2263	0	0	0.2455	0.234667	0.0098348	0.496614
7186	TRAF2	TNF receptor associated factor 2	MGC:45012|TRAP|TRAP3	NP_066961	1	1	0.4038	3	3	0.7929	0	0	0.2225	0.473067	0.29144	0	0	0.2322	0	0	0.2263	0	0	0.2455	0.234667	0.0098348	0.496054
342933	ZSCAN5B	zinc finger and SCAN domain containing 5B	ZNF371|ZNF495B	NP_001073925	2	2	0.5833	4	4	0.9795	0	0	0.2225	0.5951	0.378638	0	0	0.2322	1	1	0.4074	0	0	0.2455	0.295033	0.0975393	0.495771
389690	MROH5	maestro heat like repeat family member 5	-	NP_997297	0	0	0.2243	4	4	0.9795	0	0	0.2225	0.475433	0.436535	0	0	0.2322	0	0	0.2263	0	0	0.2455	0.234667	0.0098348	0.493585
54331	GNG2	guanine nucleotide binding protein (G protein), gamma 2	-	NP_001230702;NP_001230703;NP_444292	5	10	2.0193	4	7	1.5392	5	8	1.6464	1.73497	0.252006	3	4	0.9753	3	4	0.9507	2	2	0.6382	0.854733	0.187926	0.492651
259282	BOD1L1	biorientation of chromosomes in cell division 1 like 1	BOD1L|FAM44A	NP_683692	59	61	11.1834	54	62	11.813	18	18	3.4269	8.80777	4.67059	18	18	3.577	8	8	1.6751	37	38	7.7134	4.32183	3.08729	0.490684
29123	ANKRD11	ankyrin repeat domain 11	ANCO-1|ANCO1|LZ16|T13	NP_001243111;NP_001243112;NP_037407	8	9	1.8397	4	4	0.9795	0	0	0.2225	1.0139	0.809149	0	0	0.2322	0	0	0.2263	3	4	1.031	0.4965	0.4629	0.489693
1387	CREBBP	CREB binding protein	CBP|KAT3A|RSTS	NP_001073315;NP_004371	3	3	0.7627	7	7	1.5392	9	9	1.8244	1.37543	0.549469	4	4	0.9753	2	2	0.5885	1	1	0.4418	0.668533	0.275608	0.486053
55847	CISD1	CDGSH iron sulfur domain 1	C10orf70|MDS029|ZCD1|mitoNEET	NP_060934	5	12	2.3783	5	12	2.4723	5	12	2.3585	2.40303	0.0607981	5	8	1.7185	2	4	0.9507	1	3	0.8346	1.16793	0.480325	0.486025
9917	FAM20B	family with sequence similarity 20 member B	gxk1	NP_001311239;NP_001311240;NP_055679	4	4	0.9422	5	5	1.1661	6	8	1.6464	1.25157	0.359796	3	3	0.7895	2	2	0.5885	1	1	0.4418	0.6066	0.174555	0.484673
10150	MBNL2	muscleblind-like splicing regulator 2	MBLL|MBLL39|PRO2032	NP_001292999;NP_659002;NP_997187	4	4	0.9422	5	5	1.1661	7	8	1.6464	1.25157	0.359796	3	3	0.7895	2	2	0.5885	1	1	0.4418	0.6066	0.174555	0.484673
7323	UBE2D3	ubiquitin conjugating enzyme E2D 3	E2(17)KB3|UBC4/5|UBCH5C	NP_001287724;NP_003331;NP_871615;NP_871616;NP_871617;NP_871618;NP_871619;NP_871620;NP_871621;NP_871622	3	4	0.9422	5	6	1.3526	8	14	2.7146	1.6698	0.9278	3	3	0.7895	1	2	0.5885	3	4	1.031	0.803	0.221559	0.480896
3987	LIMS1	LIM-type zinc finger domains 1	PINCH|PINCH-1|PINCH1	NP_001180411;NP_001180412;NP_001180413;NP_001180414;NP_001180417;NP_004978	7	8	1.6602	10	10	2.0991	10	12	2.3585	2.03927	0.352974	8	9	1.9043	2	3	0.7696	0	0	0.2455	0.973133	0.847923	0.477198
9643	MORF4L2	mortality factor 4 like 2	MORFL2|MRGX	NP_001135890;NP_001135891;NP_001135892;NP_001135893;NP_001135894;NP_001135895;NP_001135896;NP_001135897;NP_001135898;NP_001135899;NP_001135900;NP_001135901;NP_001135902;NP_001135903;NP_001135904;NP_036418	4	6	1.3012	1	1	0.4197	4	4	0.9344	0.8851	0.442813	0	0	0.2322	2	2	0.5885	1	1	0.4418	0.420833	0.179073	0.475464
23152	CIC	capicua transcriptional repressor	-	NP_001291744;NP_055940	9	9	1.8397	6	8	1.7259	5	5	1.1124	1.55933	0.391216	5	5	1.1611	0	0	0.2263	3	3	0.8346	0.740667	0.474426	0.474989
6281	S100A10	S100 calcium binding protein A10	42C|ANX2L|ANX2LG|CAL1L|CLP11|Ca[1]|GP11|P11|p10	NP_002957	4	7	1.4807	4	5	1.1661	2	3	0.7564	1.1344	0.363189	1	1	0.418	3	4	0.9507	0	0	0.2455	0.538067	0.367612	0.474318
79623	GALNT14	polypeptide N-acetylgalactosaminyltransferase 14	GALNT15|GalNac-T10|GalNac-T14	NP_001240755;NP_001240756;NP_078848	4	4	0.9422	5	5	1.1661	4	4	0.9344	1.01423	0.131578	3	3	0.7895	1	1	0.4074	0	0	0.2455	0.4808	0.279329	0.474053
391322	LOC391322	D-dopachrome tautomerase-like	-	NP_001138403	3	5	1.1217	4	4	0.9795	3	4	0.9344	1.01187	0.0977549	1	1	0.418	3	3	0.7696	0	0	0.2455	0.4777	0.267102	0.472098
9556	C14orf2	chromosome 14 open reading frame 2	MP68|PLPM	NP_001120865;NP_004885	2	4	0.9422	3	5	1.1661	2	2	0.5784	0.895567	0.296612	1	1	0.418	1	1	0.4074	1	1	0.4418	0.4224	0.017617	0.471657
55702	CCDC94	coiled-coil domain containing 94	-	NP_060544	2	2	0.5833	3	3	0.7929	6	6	1.2904	0.888867	0.363187	1	1	0.418	2	2	0.5885	0	0	0.2455	0.417333	0.171501	0.469512
2957	GTF2A1	general transcription factor IIA 1	TF2A1|TFIIA|TFIIA-42|TFIIAL	NP_001265869;NP_056943;NP_963889	2	2	0.5833	1	4	0.9795	2	3	0.7564	0.773067	0.198625	0	0	0.2322	1	1	0.4074	1	1	0.4418	0.360467	0.112406	0.466281
7321	UBE2D1	ubiquitin conjugating enzyme E2D 1	E2(17)KB1|SFT|UBC4/5|UBCH5|UBCH5A	NP_001191809;NP_003329	1	1	0.4038	1	1	0.4197	2	7	1.4684	0.763967	0.610109	0	0	0.2322	2	2	0.5885	0	0	0.2455	0.3554	0.20198	0.465204
5440	POLR2K	polymerase (RNA) II (DNA directed) polypeptide K, 7.0kDa	ABC10-alpha|RPABC4|RPB10alpha|RPB12|RPB7.0|hRPB7.0|hsRPB10a	NP_005025	3	4	0.9422	3	3	0.7929	2	2	0.5784	0.771167	0.182871	2	2	0.6037	0	0	0.2263	0	0	0.2455	0.3585	0.212566	0.46488
93436	ARMC6	armadillo repeat containing 6	R30923_1	NP_001186125;NP_219483	6	6	1.3012	5	5	1.1661	7	7	1.4684	1.3119	0.151434	1	1	0.418	3	3	0.7696	2	2	0.6382	0.6086	0.177659	0.463907
29127	RACGAP1	Rac GTPase activating protein 1	CYK4|HsCYK-4|ID-GAP|MgcRacGAP	NP_001119575;NP_001119576;NP_001306928;NP_001306929;NP_001306930;NP_001306931;NP_001306932;NP_001306933;NP_001306934;NP_001306935;NP_001306936;NP_037409	3	3	0.7627	4	4	0.9795	2	2	0.5784	0.773533	0.200769	2	2	0.6037	0	0	0.2263	0	0	0.2455	0.3585	0.212566	0.463458
5825	ABCD3	ATP binding cassette subfamily D member 3	ABC43|CBAS5|PMP70|PXMP1|ZWS2	NP_001116146;NP_002849	2	2	0.5833	1	2	0.6063	3	3	0.7564	0.648667	0.0940059	0	0	0.2322	0	0	0.2263	1	1	0.4418	0.3001	0.122751	0.462641
54832	VPS13C	vacuolar protein sorting 13 homolog C (S. cerevisiae)	-	NP_001018098;NP_060154;NP_060550;NP_065872	35	36	6.6891	38	42	8.0746	10	11	2.1805	5.64807	3.08187	8	8	1.7185	4	5	1.1318	24	24	4.9607	2.60367	2.06222	0.460984
3598	IL13RA2	interleukin 13 receptor subunit alpha 2	CD213A2|CT19|IL-13R|IL13BP	NP_000631	3	5	1.1217	1	1	0.4197	1	1	0.4004	0.647267	0.410985	1	1	0.418	0	0	0.2263	0	0	0.2455	0.2966	0.105573	0.458235
9162	DGKI	diacylglycerol kinase iota	DGK-IOTA	NP_001308637;NP_001308638;NP_001308639;NP_004708	0	0	0.2243	1	1	0.4197	3	6	1.2904	0.6448	0.567578	0	0	0.2322	1	1	0.4074	0	0	0.2455	0.295033	0.0975393	0.457558
84300	UQCC2	ubiquinol-cytochrome c reductase complex assembly factor 2	C6orf125|Cbp6|M19|MNF1|bA6B20.2	NP_115716	2	2	0.5833	2	2	0.6063	3	3	0.7564	0.648667	0.0940059	1	1	0.418	0	0	0.2263	0	0	0.2455	0.2966	0.105573	0.457246
59286	UBL5	ubiquitin like 5	HUB1	NP_001041706;NP_077268	4	8	1.6602	4	8	1.7259	5	9	1.8244	1.73683	0.0826442	4	6	1.3469	2	2	0.5885	1	1	0.4418	0.7924	0.485781	0.456233
11116	FGFR1OP	FGFR1 oncogene partner	FOP	NP_001265619;NP_008976;NP_919410	1	1	0.4038	3	3	0.7929	3	3	0.7564	0.651033	0.214887	1	1	0.418	0	0	0.2263	0	0	0.2455	0.2966	0.105573	0.455583
9736	USP34	ubiquitin specific peptidase 34	-	NP_055524	4	4	0.9422	8	8	1.7259	2	2	0.5784	1.08217	0.586415	1	1	0.418	0	0	0.2263	3	3	0.8346	0.492967	0.311002	0.455537
125988	C19orf70	chromosome 19 open reading frame 70	MIC13|P117|QIL1	NP_001295169;NP_991330	0	0	0.2243	2	2	0.6063	5	5	1.1124	0.647667	0.445493	0	0	0.2322	1	1	0.4074	0	0	0.2455	0.295033	0.0975393	0.455533
9474	ATG5	autophagy related 5	APG5|APG5-LIKE|APG5L|ASP|hAPG5	NP_001273035;NP_001273036;NP_001273037;NP_001273040;NP_004840	3	3	0.7627	3	3	0.7929	1	1	0.4004	0.652	0.218415	1	1	0.418	0	0	0.2263	0	0	0.2455	0.2966	0.105573	0.454908
79776	ZFHX4	zinc finger homeobox 4	ZFH4|ZHF4	NP_078997	6	6	1.3012	6	6	1.3526	2	2	0.5784	1.0774	0.43291	2	2	0.6037	0	0	0.2263	2	2	0.6382	0.4894	0.228503	0.454242
126328	NDUFA11	NADH:ubiquinone oxidoreductase subunit A11	B14.7|CI-B14.7	NP_001180304;NP_783313	2	2	0.5833	2	4	0.9795	1	1	0.4004	0.6544	0.296025	1	1	0.418	0	0	0.2263	0	0	0.2455	0.2966	0.105573	0.45324
10728	PTGES3	prostaglandin E synthase 3	P23|TEBP|cPGES	NP_001269530;NP_001269531;NP_001269532;NP_001269533;NP_001269534;NP_006592	10	13	2.5579	6	10	2.0991	10	16	3.0707	2.5759	0.48605	5	9	1.9043	4	4	0.9507	2	2	0.6382	1.1644	0.659548	0.452036
1063	CENPF	centromere protein F	CENF|CILD31|PRO1779|hcp-1	NP_057427	97	107	19.4636	96	107	20.2345	50	51	9.307	16.335	6.09865	30	30	5.808	17	17	3.3055	63	65	13.0263	7.37993	5.04745	0.451786
7322	UBE2D2	ubiquitin conjugating enzyme E2D 2	E2(17)KB2|PUBC1|UBC4|UBC4/5|UBCH4|UBCH5B	NP_003330;NP_862821	3	4	0.9422	3	4	0.9795	7	13	2.5365	1.48607	0.909893	2	2	0.6037	2	3	0.7696	1	2	0.6382	0.6705	0.0875395	0.451191
100128496	C20orf78	chromosome 20 open reading frame 78	dJ1068E13.1	NP_001229600;NP_001289747	0	0	0.2243	0	0	0.2332	3	5	1.1124	0.5233	0.510195	0	0	0.2322	0	0	0.2263	0	0	0.2455	0.234667	0.0098348	0.448436
26960	NBEA	neurobeachin	BCL8B|LYST2	NP_001191126;NP_056493	0	0	0.2243	0	0	0.2332	5	5	1.1124	0.5233	0.510195	0	0	0.2322	0	0	0.2263	0	0	0.2455	0.234667	0.0098348	0.448436
23155	CLCC1	chloride channel CLIC like 1	MCLC	NP_001041675;NP_001265131;NP_001265132;NP_055942	2	2	0.5833	0	0	0.2332	3	3	0.7564	0.5243	0.266543	0	0	0.2322	0	0	0.2263	0	0	0.2455	0.234667	0.0098348	0.447581
220	ALDH1A3	aldehyde dehydrogenase 1 family member A3	ALDH1A6|ALDH6|MCOP8|RALDH3	NP_000684;NP_001280744	3	3	0.7627	0	0	0.2332	2	2	0.5784	0.524767	0.268794	0	0	0.2322	0	0	0.2263	0	0	0.2455	0.234667	0.0098348	0.447183
3628	INPP1	inositol polyphosphate-1-phosphatase	-	NP_001122400;NP_002185	0	0	0.2243	1	1	0.4197	4	4	0.9344	0.526133	0.366819	0	0	0.2322	0	0	0.2263	0	0	0.2455	0.234667	0.0098348	0.446021
57582	KCNT1	potassium channel, sodium activated subfamily T, member 1	EIEE14|ENFL5|KCa4.1|SLACK|Slo2.2|bA100C15.2	NP_001258932;NP_065873	2	2	0.5833	1	1	0.4197	2	2	0.5784	0.527133	0.0930722	0	0	0.2322	0	0	0.2263	0	0	0.2455	0.234667	0.0098348	0.445175
91582	RPS19BP1	ribosomal protein S19 binding protein 1	AROS|S19BP	NP_919307	5	6	1.3012	4	4	0.9795	2	2	0.5784	0.953033	0.362126	2	2	0.6037	0	0	0.2263	1	1	0.4418	0.423933	0.189333	0.444825
3485	IGFBP2	insulin like growth factor binding protein 2	IBP2|IGF-BP53	NP_001300919;NP_001300921;NP_001300922;NP_000588	5	6	1.3012	2	2	0.6063	4	4	0.9344	0.9473	0.34763	3	3	0.7895	0	0	0.2263	0	0	0.2455	0.420433	0.319765	0.443823
147007	TMEM199	transmembrane protein 199	C17orf32	NP_689677	2	2	0.5833	2	2	0.6063	1	1	0.4004	0.53	0.112825	0	0	0.2322	0	0	0.2263	0	0	0.2455	0.234667	0.0098348	0.442767
9553	MRPL33	mitochondrial ribosomal protein L33	C2orf1|L33mt|MRP-L33|RPL33L	NP_004882;NP_663303	3	4	0.9422	3	4	0.9795	3	4	0.9344	0.952033	0.0241044	2	3	0.7895	0	0	0.2263	0	0	0.2455	0.420433	0.319765	0.441616
825	CAPN3	calpain 3	CANP3|CANPL3|LGMD2|LGMD2A|nCL-1|p94	NP_000061;NP_077320;NP_775110;NP_775111;NP_775112;NP_775113	0	0	0.2243	3	3	0.7929	2	2	0.5784	0.531867	0.287142	0	0	0.2322	0	0	0.2263	0	0	0.2455	0.234667	0.0098348	0.441213
122553	TRAPPC6B	trafficking protein particle complex 6B	TPC6	NP_001073005;NP_803235	3	4	0.9422	2	2	0.6063	3	4	0.9344	0.827633	0.19172	2	2	0.6037	0	0	0.2263	0	0	0.2455	0.3585	0.212566	0.433163
10011	SRA1	steroid receptor RNA activator 1	SRA|SRAP|STRAA1|pp7684	NP_001030312;NP_001240693	4	4	0.9422	2	2	0.6063	4	4	0.9344	0.827633	0.19172	1	1	0.418	1	1	0.4074	0	0	0.2455	0.356967	0.0966783	0.43131
4257	MGST1	microsomal glutathione S-transferase 1	GST12|MGST|MGST-I	NP_001247440;NP_001247441;NP_001254527;NP_064696;NP_665707;NP_665734;NP_665735	4	7	1.4807	5	10	2.0991	4	7	1.4684	1.68273	0.360637	4	5	1.1611	3	3	0.7696	0	0	0.2455	0.7254	0.459398	0.431084
221830	TWISTNB	TWIST neighbor	-	NP_001002926	0	0	0.2243	3	3	0.7929	7	7	1.4684	0.828533	0.622815	1	1	0.418	1	1	0.4074	0	0	0.2455	0.356967	0.0966783	0.430842
134147	CMBL	carboxymethylenebutenolidase homolog (Pseudomonas)	JS-1	NP_620164	4	4	0.9422	2	2	0.6063	3	4	0.9344	0.827633	0.19172	0	0	0.2322	2	2	0.5885	0	0	0.2455	0.3554	0.20198	0.429417
64215	DNAJC1	DnaJ heat shock protein family (Hsp40) member C1	DNAJL1|ERdj1|HTJ1|MTJ1	NP_071760	5	5	1.1217	1	1	0.4197	2	2	0.5784	0.7066	0.368141	0	0	0.2322	0	0	0.2263	1	1	0.4418	0.3001	0.122751	0.42471
463	ZFHX3	zinc finger homeobox 3	ATBF1|ATBT|ZNF927	NP_001158238;NP_008816	14	14	2.7374	10	10	2.0991	4	4	0.9344	1.92363	0.914218	2	2	0.6037	0	0	0.2263	7	7	1.6203	0.816767	0.721011	0.424596
57412	AS3MT	arsenite methyltransferase	CYT19	NP_065733	3	3	0.7627	2	2	0.6063	3	3	0.7564	0.708467	0.088535	1	1	0.418	0	0	0.2263	0	0	0.2455	0.2966	0.105573	0.418651
9946	CRYZL1	crystallin zeta like 1	4P11|QOH-1	NP_665857	0	0	0.2243	2	2	0.6063	5	6	1.2904	0.707	0.540137	0	0	0.2322	1	1	0.4074	0	0	0.2455	0.295033	0.0975393	0.417303
8085	KMT2D	lysine (K)-specific methyltransferase 2D	AAD10|ALR|CAGL114|KABUK1|KMS|MLL2|MLL4|TNRC21	NP_003473	21	21	3.9944	12	12	2.4723	8	8	1.6464	2.70437	1.19108	5	5	1.1611	1	1	0.4074	8	8	1.8167	1.1284	0.705219	0.417251
84618	NT5C1A	5'-nucleotidase, cytosolic IA	CN-I|CN-IA|CN1|CN1A|CNI	NP_115915	0	0	0.2243	4	4	0.9795	4	4	0.9344	0.712733	0.423596	1	1	0.418	0	0	0.2263	0	0	0.2455	0.2966	0.105573	0.416144
154807	VKORC1L1	vitamin K epoxide reductase complex subunit 1 like 1	-	NP_001271271;NP_775788	2	2	0.5833	3	4	0.9795	2	2	0.5784	0.713733	0.230174	1	1	0.418	0	0	0.2263	0	0	0.2455	0.2966	0.105573	0.415561
51142	CHCHD2	coiled-coil-helix-coiled-coil-helix domain containing 2	C7orf17	NP_001307256;NP_057223	3	4	0.9422	4	6	1.3526	3	3	0.7564	1.01707	0.305069	1	1	0.418	1	1	0.4074	1	1	0.4418	0.4224	0.017617	0.415312
2195	FAT1	FAT atypical cadherin 1	CDHF7|CDHR8|FAT|ME5|hFat1	NP_005236	12	12	2.3783	4	4	0.9795	0	0	0.2225	1.19343	1.09371	1	1	0.418	0	0	0.2263	3	3	0.8346	0.492967	0.311002	0.413066
10142	AKAP9	A-kinase anchoring protein 9	AKAP-9|AKAP350|AKAP450|CG-NAP|HYPERION|LQT11|MU-RMS-40.16A|PPP1R45|PRKA9|YOTIAO	NP_005742;NP_671714	40	40	7.4079	46	46	8.8221	5	5	1.1124	5.7808	4.10432	5	5	1.1611	3	3	0.7696	25	25	5.1573	2.36267	2.42813	0.408709
140735	DYNLL2	dynein, light chain, LC8-type 2	DNCL1B|Dlc2|RSPH22	NP_542408	6	7	1.4807	3	3	0.7929	6	6	1.2904	1.188	0.35515	2	2	0.6037	1	1	0.4074	1	1	0.4418	0.4843	0.104824	0.40766
54751	FBLIM1	filamin binding LIM protein 1	CAL|FBLP-1|FBLP1	NP_001019386;NP_001019387;NP_060026	5	5	1.1217	4	4	0.9795	7	7	1.4684	1.18987	0.251477	2	2	0.6037	1	1	0.4074	1	1	0.4418	0.4843	0.104824	0.40702
79659	DYNC2H1	dynein, cytoplasmic 2, heavy chain 1	ATD3|DHC1b|DHC2|DNCH2|DYH1B|SRPS2B|SRTD3|hdhc11	NP_001073932;NP_001368	2	2	0.5833	8	8	1.7259	1	1	0.4004	0.9032	0.718324	0	0	0.2322	0	0	0.2263	2	2	0.6382	0.365567	0.236126	0.404746
4682	NUBP1	nucleotide binding protein 1	NBP|NBP1|NBP35	NP_001265435;NP_001310523;NP_001310524;NP_001310525;NP_001310526;NP_002475	4	4	0.9422	4	4	0.9795	3	3	0.7564	0.8927	0.119504	0	0	0.2322	1	1	0.4074	1	1	0.4418	0.360467	0.112406	0.403794
388962	BOLA3	bolA family member 3	MMDS2	NP_001030582;NP_997717	2	4	0.9422	1	1	0.4197	1	1	0.4004	0.587433	0.307388	0	0	0.2322	0	0	0.2263	0	0	0.2455	0.234667	0.0098348	0.399478
394	ARHGAP5	Rho GTPase activating protein 5	GFI2|RhoGAP5|p190-B|p190BRhoGAP	NP_001025226;NP_001164	7	7	1.4807	10	10	2.0991	2	2	0.5784	1.38607	0.764754	3	3	0.7895	0	0	0.2263	2	2	0.6382	0.551333	0.291475	0.397768
11342	RNF13	ring finger protein 13	RZF	NP_009213;NP_899237	3	3	0.7627	0	0	0.2332	4	6	1.2904	0.7621	0.5286	0	0	0.2322	0	0	0.2263	1	1	0.4418	0.3001	0.122751	0.39378
23131	GPATCH8	G-patch domain containing 8	GPATC8|KIAA0553	NP_001002909;NP_001291868;NP_001291869;NP_001291870;NP_001291871;NP_001291872	18	19	3.6352	2	2	0.6063	1	1	0.4004	1.5473	1.8111	4	4	0.9753	1	1	0.4074	1	1	0.4418	0.608167	0.318412	0.39305
8655	DYNLL1	dynein, light chain, LC8-type 1	DLC1|DLC8|DNCL1|DNCLC1|LC8|LC8a|PIN|hdlc1	NP_001032583;NP_001032584;NP_003737	8	11	2.1988	4	5	1.1661	9	9	1.8244	1.72977	0.522813	3	3	0.7895	2	2	0.5885	2	2	0.6382	0.672067	0.104692	0.38853
51619	UBE2D4	ubiquitin conjugating enzyme E2D 4 (putative)	HBUCE1	NP_057067	1	1	0.4038	1	1	0.4197	2	7	1.4684	0.763967	0.610109	0	0	0.2322	1	1	0.4074	0	0	0.2455	0.295033	0.0975393	0.386186
2638	GC	group-specific component (vitamin D binding protein)	DBP|DBP/GC|GRD3|Gc-MAF|GcMAF|HEL-S-51|VDBG|VDBP	NP_000574;NP_001191235;NP_001191236	3	7	1.4807	5	8	1.7259	6	13	2.5365	1.91437	0.552556	5	7	1.5327	1	1	0.4074	0	0	0.2455	0.728533	0.701118	0.380561
5557	PRIM1	primase, DNA, polypeptide 1 (49kDa)	p49	NP_000937	4	4	0.9422	6	6	1.3526	5	5	1.1124	1.13573	0.206193	2	2	0.6037	1	1	0.4074	0	0	0.2455	0.418867	0.179375	0.368807
11034	DSTN	destrin (actin depolymerizing factor)	ACTDP|ADF|HEL32|bA462D18.2	NP_001011546;NP_006861	17	23	4.3536	15	24	4.7125	12	17	3.2488	4.10497	0.762868	11	13	2.6476	4	4	0.9507	2	3	0.8346	1.47763	1.01488	0.359962
8925	HERC1	HECT and RLD domain containing E3 ubiquitin protein ligase family member 1	p532|p619	NP_003913	11	11	2.1988	9	9	1.9125	2	2	0.5784	1.56323	0.86482	0	0	0.2322	1	1	0.4074	4	4	1.031	0.556867	0.419852	0.356227
7555	CNBP	CCHC-type zinc finger, nucleic acid binding protein	CNBP1|DM2|PROMM|RNF163|ZCCHC22|ZNF9	NP_001120664;NP_001120665;NP_001120666;NP_001120667;NP_001120668;NP_003409	9	19	3.6352	10	12	2.4723	9	10	2.0024	2.7033	0.840553	7	10	2.0901	0	0	0.2263	1	1	0.4418	0.9194	1.01957	0.340103
65264	UBE2Z	ubiquitin conjugating enzyme E2Z	HOYS7|USE1	NP_075567	4	4	0.9422	7	7	1.5392	6	6	1.2904	1.25727	0.299876	2	2	0.6037	1	1	0.4074	0	0	0.2455	0.418867	0.179375	0.333157
3481	IGF2	insulin like growth factor 2	C11orf43|GRDF|IGF-II|PP9974	NP_000603;NP_001007140;NP_001121070;NP_001278790;NP_001278791	3	3	0.7627	2	2	0.6063	3	3	0.7564	0.708467	0.088535	0	0	0.2322	0	0	0.2263	0	0	0.2455	0.234667	0.0098348	0.331232
9857	CEP350	centrosomal protein 350kDa	CAP350|GM133	NP_055625	16	17	3.2761	15	16	3.219	1	1	0.4004	2.2985	1.64405	0	0	0.2322	0	0	0.2263	8	8	1.8167	0.7584	0.916519	0.329954
